# Supplementary material for: Transcriptomic and Genome-wide Association Study Reveal Long Noncoding RNAs&nbsp;Responding to Nitrogen Deficiency in Maize
Source: Research Square preprint supplement (doi:10.21203/rs.3.rs-104831/v1), 2020-11-13
Supplement: Supplementary file 1 [file 06cef2d17278d431733acc81.xlsx]

## Sheet: Sheet1
	Supporting Table 9. The targets of lncRNAs contained significant SNPs for multiple root traits.

## Sheet: co_location
Chromosome	Trait	Marker	Position	lncRNA_ID	lncRNA_Gene_ID	lncRNA_Status	lncRNA_Start	lncRNA_End	lncRNA_Strand	mRNA_ID	mRNA_Gene_ID	mRNA_Gene_Description	mRNA_Start	mRNA_End	mRNA_Strand	Distance	Location
chr4	Crossings	PZE-104092320	167437768	LNC_002985	XLOC_029548	lncRNA	170101216	170102323	+	Zm00001d051804_T002	Zm00001d051804	sp|P38561|GLNA3_MAIZE Glutamine synthetase root isozyme 3 OS=Zea mays GN=GLN4 PE=1 SV=1//0	170036801	170039987	-	61228	upstream
chr4	Crossings	PZE-104092320	167437768	LNC_002985	XLOC_029548	lncRNA	170101216	170102323	+	Zm00001d051804_T003	Zm00001d051804	sp|P38561|GLNA3_MAIZE Glutamine synthetase root isozyme 3 OS=Zea mays GN=GLN4 PE=1 SV=1//0	170036802	170039987	-	61228	upstream
chr4	Crossings	PZE-104092320	167437768	LNC_002985	XLOC_029548	lncRNA	170101216	170102323	+	Zm00001d051804_T001	Zm00001d051804	sp|P38561|GLNA3_MAIZE Glutamine synthetase root isozyme 3 OS=Zea mays GN=GLN4 PE=1 SV=1//0	170036696	170039992	-	61223	upstream
chr4	Crossings	PZE-104092320	167437768	LNC_002984	XLOC_029547	lncRNA	170090465	170090709	+	Zm00001d051804_T002	Zm00001d051804	sp|P38561|GLNA3_MAIZE Glutamine synthetase root isozyme 3 OS=Zea mays GN=GLN4 PE=1 SV=1//0	170036801	170039987	-	50477	upstream
chr4	Crossings	PZE-104092320	167437768	LNC_002984	XLOC_029547	lncRNA	170090465	170090709	+	Zm00001d051804_T003	Zm00001d051804	sp|P38561|GLNA3_MAIZE Glutamine synthetase root isozyme 3 OS=Zea mays GN=GLN4 PE=1 SV=1//0	170036802	170039987	-	50477	upstream
chr4	Crossings	PZE-104092320	167437768	LNC_002984	XLOC_029547	lncRNA	170090465	170090709	+	Zm00001d051804_T001	Zm00001d051804	sp|P38561|GLNA3_MAIZE Glutamine synthetase root isozyme 3 OS=Zea mays GN=GLN4 PE=1 SV=1//0	170036696	170039992	-	50472	upstream
chr4	Crossings	PZE-104092320	167437768	LNC_002986	XLOC_029549	lncRNA	170103010	170103707	+	Zm00001d051804_T002	Zm00001d051804	sp|P38561|GLNA3_MAIZE Glutamine synthetase root isozyme 3 OS=Zea mays GN=GLN4 PE=1 SV=1//0	170036801	170039987	-	63022	upstream
chr4	Crossings	PZE-104092320	167437768	LNC_002986	XLOC_029549	lncRNA	170103010	170103707	+	Zm00001d051804_T003	Zm00001d051804	sp|P38561|GLNA3_MAIZE Glutamine synthetase root isozyme 3 OS=Zea mays GN=GLN4 PE=1 SV=1//0	170036802	170039987	-	63022	upstream
chr4	Crossings	PZE-104092320	167437768	LNC_002986	XLOC_029549	lncRNA	170103010	170103707	+	Zm00001d051804_T001	Zm00001d051804	sp|P38561|GLNA3_MAIZE Glutamine synthetase root isozyme 3 OS=Zea mays GN=GLN4 PE=1 SV=1//0	170036696	170039992	-	63017	upstream
chr4	Crossings	PZE-104092320	167437768	LNC_002980	XLOC_029475	lncRNA	166155073	166155298	+	Zm00001d051666_T001	Zm00001d051666	sp|Q69T31|CINV1_ORYSJ Cytosolic invertase 1 OS=Oryza sativa subsp. japonica GN=CINV1 PE=1 SV=1//0	166118999	166121899	-	33173	upstream
chr4	Crossings	PZE-104092320	167437768	LNC_002980	XLOC_029475	lncRNA	166155073	166155298	+	Zm00001d051664_T001	Zm00001d051664	-//-	166088731	166091819	-	63253	upstream
chr4	Tips	PZE-104049074	75505829	LNC_003194	XLOC_031800	lncRNA	72541652	72541999	-	Zm00001d050195_T001	Zm00001d050195	sp|O22176|WRK15_ARATH Probable WRKY transcription factor 15 OS=Arabidopsis thaliana GN=WRKY15 PE=2 SV=1//1.63871e-25	72636377	72637297	-	94377	downstream
chr4	Forks	PZE-104043052	61411237	LNC_002856	XLOC_028468	lncRNA	65327976	65328196	+	Zm00001d050092_T001	Zm00001d050092	sp|O49607|SBT16_ARATH Subtilisin-like protease SBT1.6 OS=Arabidopsis thaliana GN=SBT1.6 PE=2 SV=1//0	65314401	65316809	+	11166	downstream
chr4	Forks	PZE-104043052	61411237	LNC_003178	XLOC_031660	lncRNA	57592850	57594756	-	Zm00001d049990_T001	Zm00001d049990	sp|Q9FRH3|CAP13_ARATH Putative clathrin assembly protein At1g25240 OS=Arabidopsis thaliana GN=At1g25240 PE=3 SV=1//3.76485e-53	57683950	57685116	+	89193	upstream
chr4	Forks	PZE-104043052	61411237	LNC_002846	XLOC_028390	lncRNA	57604112	57604416	+	Zm00001d049990_T001	Zm00001d049990	sp|Q9FRH3|CAP13_ARATH Putative clathrin assembly protein At1g25240 OS=Arabidopsis thaliana GN=At1g25240 PE=3 SV=1//3.76485e-53	57683950	57685116	+	79533	upstream
chr4	PRL	ZM005894-0463	31060531	LNC_002819	XLOC_028102	lncRNA	34769499	34769742	+	Zm00001d049554_T001	Zm00001d049554	sp|Q9C5L3|GLPT1_ARATH Putative glycerol-3-phosphate transporter 1 OS=Arabidopsis thaliana GN=At3g47420 PE=2 SV=1//0	34700552	34704381	-	65117	upstream
chr4	PRL	ZM005894-0463	31060531	LNC_002818	XLOC_028099	lncRNA	34619647	34619877	+	Zm00001d049554_T001	Zm00001d049554	sp|Q9C5L3|GLPT1_ARATH Putative glycerol-3-phosphate transporter 1 OS=Arabidopsis thaliana GN=At3g47420 PE=2 SV=1//0	34700552	34704381	-	80674	downstream
chr4	PRL	ZM005894-0463	31060531	LNC_003144	XLOC_031367	lncRNA	34290460	34290742	-	Zm00001d049551_T001	Zm00001d049551	sp|O48923|C71DA_SOYBN Cytochrome P450 71D10 OS=Glycine max GN=CYP71D10 PE=2 SV=1//2.52796e-95	34378460	34380111	-	87717	downstream
chr4	PRL	ZM005894-0463	31060531	LNC_002817	XLOC_028096	lncRNA	34372309	34373061	+	Zm00001d049551_T001	Zm00001d049551	sp|O48923|C71DA_SOYBN Cytochrome P450 71D10 OS=Glycine max GN=CYP71D10 PE=2 SV=1//2.52796e-95	34378460	34380111	-	5398	downstream
chr4	PRL	ZM005894-0463	31060531	LNC_003142	XLOC_031313	lncRNA	29876861	29878145	-	Zm00001d049418_T001	Zm00001d049418	sp|Q2QXJ0|GL124_ORYSJ Putative germin-like protein 12-4 OS=Oryza sativa subsp. japonica GN=Os12g0155000 PE=3 SV=2//3.99957e-130	29894576	29895967	-	16430	downstream
chr4	PRL	ZM005894-0463	31060531	LNC_002811	XLOC_028013	lncRNA	29941956	29942194	+	Zm00001d049418_T001	Zm00001d049418	sp|Q2QXJ0|GL124_ORYSJ Putative germin-like protein 12-4 OS=Oryza sativa subsp. japonica GN=Os12g0155000 PE=3 SV=2//3.99957e-130	29894576	29895967	-	45988	upstream
chr4	PRL	ZM005894-0463	31060531	LNC_003141	XLOC_031305	lncRNA	29533131	29534639	-	Zm00001d049407_T001	Zm00001d049407	sp|Q6UIL3|LAHY_LARTR (+)-larreatricin hydroxylase, chloroplastic OS=Larrea tridentata PE=1 SV=1//1.51156e-80	29595235	29597575	-	60595	downstream
chr4	CRN/Crossings	PZE-104016717/SYN30707	16500659/17414413	LNC_002800	XLOC_027884	lncRNA	19769019	19770625	+	Zm00001d049187_T001	Zm00001d049187	sp|Q2R480|6PGD2_ORYSJ 6-phosphogluconate dehydrogenase, decarboxylating 2, chloroplastic OS=Oryza sativa subsp. japonica GN=G6PGH2 PE=2 SV=1//0	19755800	19757563	-	11455	upstream
chr4	CRN/Crossings	PZE-104016717/SYN30707	16500659/17414413	LNC_002801	XLOC_027884	lncRNA	19769019	19770625	+	Zm00001d049187_T001	Zm00001d049187	sp|Q2R480|6PGD2_ORYSJ 6-phosphogluconate dehydrogenase, decarboxylating 2, chloroplastic OS=Oryza sativa subsp. japonica GN=G6PGH2 PE=2 SV=1//0	19755800	19757563	-	11455	upstream
chr4	CRN/Crossings	PZE-104016717/SYN30707	16500659/17414413	LNC_002802	XLOC_027884	lncRNA	19769019	19774773	+	Zm00001d049187_T001	Zm00001d049187	sp|Q2R480|6PGD2_ORYSJ 6-phosphogluconate dehydrogenase, decarboxylating 2, chloroplastic OS=Oryza sativa subsp. japonica GN=G6PGH2 PE=2 SV=1//0	19755800	19757563	-	11455	upstream
chr4	CRN/Crossings	PZE-104016717/SYN30707	16500659/17414413	LNC_003128	XLOC_031140	lncRNA	16935989	16936272	-	Zm00001d049127_T001	Zm00001d049127	sp|Q944L7|Y1480_ARATH Uncharacterized protein At1g18480 OS=Arabidopsis thaliana GN=At1g18480 PE=2 SV=1//4.21235e-89	16940880	16942236	-	4607	downstream
chr4	CRN/Crossings	PZE-104016717/SYN30707	16500659/17414413	LNC_003126	XLOC_031136	lncRNA	16917319	16917599	-	Zm00001d049127_T001	Zm00001d049127	sp|Q944L7|Y1480_ARATH Uncharacterized protein At1g18480 OS=Arabidopsis thaliana GN=At1g18480 PE=2 SV=1//4.21235e-89	16940880	16942236	-	23280	downstream
chr4	CRN/Crossings	PZE-104016717/SYN30707	16500659/17414413	LNC_003127	XLOC_031139	lncRNA	16933694	16935368	-	Zm00001d049127_T001	Zm00001d049127	sp|Q944L7|Y1480_ARATH Uncharacterized protein At1g18480 OS=Arabidopsis thaliana GN=At1g18480 PE=2 SV=1//4.21235e-89	16940880	16942236	-	5511	downstream
chr4	Forks	PZE-104010552	7929588	LNC_002790	XLOC_027776	lncRNA	12109338	12109826	+	Zm00001d048998_T001	Zm00001d048998	sp|Q9XF89|CB5_ARATH Chlorophyll a-b binding protein CP26, chloroplastic OS=Arabidopsis thaliana GN=LHCB5 PE=1 SV=1//2.36302e-138	12010181	12012169	+	97168	downstream
chr4	Forks	PZE-104010552	7929588	LNC_002789	XLOC_027775	lncRNA	12069649	12070147	+	Zm00001d048998_T001	Zm00001d048998	sp|Q9XF89|CB5_ARATH Chlorophyll a-b binding protein CP26, chloroplastic OS=Arabidopsis thaliana GN=LHCB5 PE=1 SV=1//2.36302e-138	12010181	12012169	+	57479	downstream
chr4	Forks	PZE-104010552	7929588	LNC_003112	XLOC_031051	lncRNA	11949660	11950595	-	Zm00001d048998_T001	Zm00001d048998	sp|Q9XF89|CB5_ARATH Chlorophyll a-b binding protein CP26, chloroplastic OS=Arabidopsis thaliana GN=LHCB5 PE=1 SV=1//2.36302e-138	12010181	12012169	+	59585	upstream
chr4	Forks	PZE-104010552	7929588	LNC_002788	XLOC_027756	lncRNA	11335190	11335927	+	Zm00001d048979_T001	Zm00001d048979	sp|Q53JI9|SPSA5_ORYSJ Probable sucrose-phosphate synthase 5 OS=Oryza sativa subsp. japonica GN=SPS5 PE=2 SV=1//0	11357735	11364084	-	21807	downstream
chr4	Forks	PZE-104010552	7929588	LNC_002786	XLOC_027721	lncRNA	7340822	7342322	+	Zm00001d048901_T001	Zm00001d048901	sp|Q9SN74|BH047_ARATH Transcription factor bHLH47 OS=Arabidopsis thaliana GN=BHLH47 PE=2 SV=1//4.05614e-28	7400913	7405887	+	58590	upstream
chr4	Forks	PZE-104010552	7929588	LNC_002786	XLOC_027721	lncRNA	7340822	7342322	+	Zm00001d048901_T002	Zm00001d048901	sp|Q9SN74|BH047_ARATH Transcription factor bHLH47 OS=Arabidopsis thaliana GN=BHLH47 PE=2 SV=1//4.05614e-28	7400931	7405867	+	58608	upstream
chr4	Forks	PZE-104010552	7929588	LNC_002786	XLOC_027721	lncRNA	7340822	7342322	+	Zm00001d048901_T003	Zm00001d048901	sp|Q9SN74|BH047_ARATH Transcription factor bHLH47 OS=Arabidopsis thaliana GN=BHLH47 PE=2 SV=1//4.05614e-28	7401027	7405867	+	58704	upstream
chr4	Forks	PZE-104010552	7929588	LNC_002785	XLOC_027721	lncRNA	7340157	7342322	+	Zm00001d048901_T001	Zm00001d048901	sp|Q9SN74|BH047_ARATH Transcription factor bHLH47 OS=Arabidopsis thaliana GN=BHLH47 PE=2 SV=1//4.05614e-28	7400913	7405887	+	58590	upstream
chr4	Forks	PZE-104010552	7929588	LNC_002785	XLOC_027721	lncRNA	7340157	7342322	+	Zm00001d048901_T002	Zm00001d048901	sp|Q9SN74|BH047_ARATH Transcription factor bHLH47 OS=Arabidopsis thaliana GN=BHLH47 PE=2 SV=1//4.05614e-28	7400931	7405867	+	58608	upstream
chr4	Forks	PZE-104010552	7929588	LNC_002785	XLOC_027721	lncRNA	7340157	7342322	+	Zm00001d048901_T003	Zm00001d048901	sp|Q9SN74|BH047_ARATH Transcription factor bHLH47 OS=Arabidopsis thaliana GN=BHLH47 PE=2 SV=1//4.05614e-28	7401027	7405867	+	58704	upstream
chr4	Forks	PZE-104010552	7929588	LNC_003105	XLOC_030945	lncRNA	5551721	5552852	-	Zm00001d048795_T001	Zm00001d048795	sp|Q2R0W8|SP1L2_ORYSJ Protein SPIRAL1-like 2 OS=Oryza sativa subsp. japonica GN=Os11g0629400 PE=3 SV=1//3.82605e-15	5650242	5651052	+	97389	upstream
chr4	Forks	PZE-104010552	7929588	LNC_002778	XLOC_027624	lncRNA	4535311	4535706	+	Zm00001d048736_T001	Zm00001d048736	sp|Q9ST02|NAATA_HORVU Nicotianamine aminotransferase A OS=Hordeum vulgare GN=naat-A PE=1 SV=2//9.90244e-92	4607651	4610357	+	71944	upstream
chr4	Forks	PZE-104010552	7929588	LNC_002776	XLOC_027622	lncRNA	4526810	4528783	+	Zm00001d048736_T001	Zm00001d048736	sp|Q9ST02|NAATA_HORVU Nicotianamine aminotransferase A OS=Hordeum vulgare GN=naat-A PE=1 SV=2//9.90244e-92	4607651	4610357	+	78867	upstream
chr4	Forks	PZE-104010552	7929588	LNC_002777	XLOC_027622	lncRNA	4526810	4530238	+	Zm00001d048736_T001	Zm00001d048736	sp|Q9ST02|NAATA_HORVU Nicotianamine aminotransferase A OS=Hordeum vulgare GN=naat-A PE=1 SV=2//9.90244e-92	4607651	4610357	+	77412	upstream
chr4	Forks	PZE-104010552	7929588	LNC_002774	XLOC_027622	lncRNA	4526808	4527925	+	Zm00001d048736_T001	Zm00001d048736	sp|Q9ST02|NAATA_HORVU Nicotianamine aminotransferase A OS=Hordeum vulgare GN=naat-A PE=1 SV=2//9.90244e-92	4607651	4610357	+	79725	upstream
chr4	Forks	PZE-104010552	7929588	LNC_002775	XLOC_027622	lncRNA	4526808	4528783	+	Zm00001d048736_T001	Zm00001d048736	sp|Q9ST02|NAATA_HORVU Nicotianamine aminotransferase A OS=Hordeum vulgare GN=naat-A PE=1 SV=2//9.90244e-92	4607651	4610357	+	78867	upstream
chr10	Forks	PZE-110109365	148503798	LNC_001120	XLOC_011186	lncRNA	148802189	148802415	+	Zm00001d026605_T001	Zm00001d026605	sp|Q0J930|GUN13_ORYSJ Endoglucanase 13 OS=Oryza sativa subsp. japonica GN=GLU6 PE=2 SV=1//0	148895982	148898783	-	93566	downstream
chr10	Forks	PZE-110109365	148503798	LNC_001121	XLOC_011193	lncRNA	148990936	148991742	+	Zm00001d026605_T001	Zm00001d026605	sp|Q0J930|GUN13_ORYSJ Endoglucanase 13 OS=Oryza sativa subsp. japonica GN=GLU6 PE=2 SV=1//0	148895982	148898783	-	92152	upstream
chr10	Forks	PZE-110108403	148106661	LNC_001120	XLOC_011186	lncRNA	148802189	148802415	+	Zm00001d026603_T002	Zm00001d026603	sp|B8ANF1|CHLH_ORYSI Magnesium-chelatase subunit ChlH, chloroplastic OS=Oryza sativa subsp. indica GN=CHLH PE=3 SV=1//0	148758097	148764012	-	38176	upstream
chr10	Forks	PZE-110108403	148106661	LNC_001120	XLOC_011186	lncRNA	148802189	148802415	+	Zm00001d026603_T001	Zm00001d026603	sp|B8ANF1|CHLH_ORYSI Magnesium-chelatase subunit ChlH, chloroplastic OS=Oryza sativa subsp. indica GN=CHLH PE=3 SV=1//0	148758023	148762969	-	39219	upstream
chr10	Forks	PZE-110108403	148106661	LNC_001119	XLOC_011168	lncRNA	148179405	148182517	+	Zm00001d026573_T001	Zm00001d026573	sp|Q7XR61|MTK1_ORYSJ Methylthioribose kinase 1 OS=Oryza sativa subsp. japonica GN=MTK1 PE=2 SV=1//0	148202959	148206353	-	20441	downstream
chr10	Forks	PZE-110108403	148106661	LNC_001119	XLOC_011168	lncRNA	148179405	148182517	+	Zm00001d026573_T002	Zm00001d026573	sp|Q7XR61|MTK1_ORYSJ Methylthioribose kinase 1 OS=Oryza sativa subsp. japonica GN=MTK1 PE=2 SV=1//0	148202970	148206353	-	20452	downstream
chr10	Forks	PZE-110108403	148106661	LNC_001118	XLOC_011168	lncRNA	148179405	148182517	+	Zm00001d026573_T001	Zm00001d026573	sp|Q7XR61|MTK1_ORYSJ Methylthioribose kinase 1 OS=Oryza sativa subsp. japonica GN=MTK1 PE=2 SV=1//0	148202959	148206353	-	20441	downstream
chr10	Forks	PZE-110108403	148106661	LNC_001118	XLOC_011168	lncRNA	148179405	148182517	+	Zm00001d026573_T002	Zm00001d026573	sp|Q7XR61|MTK1_ORYSJ Methylthioribose kinase 1 OS=Oryza sativa subsp. japonica GN=MTK1 PE=2 SV=1//0	148202970	148206353	-	20452	downstream
chr10	Forks	PZE-110108403	148106661	LNC_001117	XLOC_011154	lncRNA	147912603	147912878	+	Zm00001d026542_T001	Zm00001d026542	sp|Q8GUN5|PHL1_ARATH Protein PHR1-LIKE 1 OS=Arabidopsis thaliana GN=PHL1 PE=1 SV=1//1.99981e-47	147942412	147945498	-	29533	downstream
chr10	Forks	PZE-110108403	148106661	LNC_001352	XLOC_013345	lncRNA	147971634	147972007	-	Zm00001d026542_T001	Zm00001d026542	sp|Q8GUN5|PHL1_ARATH Protein PHR1-LIKE 1 OS=Arabidopsis thaliana GN=PHL1 PE=1 SV=1//1.99981e-47	147942412	147945498	-	26135	upstream
chr5	CRN	PZE-105047147	36470371	LNC_003776	XLOC_038417	lncRNA	36124831	36125111	-	Zm00001d014200_T001	Zm00001d014200	-//-	36213527	36214422	-	88415	downstream
chr5	CRN	PZE-105047147	36470371	LNC_003478	XLOC_035008	lncRNA	36230964	36231204	+	Zm00001d014200_T001	Zm00001d014200	-//-	36213527	36214422	-	16541	upstream
chr5	Forks	PUT-163a-91875212-4781	7724698	LNC_003735	XLOC_037928	lncRNA	7973264	7973587	-	Zm00001d013287_T001	Zm00001d013287	-//-	7898532	7900299	+	72964	downstream
chr5	Forks	PUT-163a-91875212-4781	7724698	LNC_003734	XLOC_037919	lncRNA	7852087	7852377	-	Zm00001d013287_T001	Zm00001d013287	-//-	7898532	7900299	+	46154	upstream
chr5	Forks	PUT-163a-91875212-4781	7724698	LNC_003431	XLOC_034480	lncRNA	7314225	7314512	+	Zm00001d013263_T001	Zm00001d013263	-//-	7387191	7388959	-	72678	downstream
		s

## Sheet: co_expresison
Trait	Marker	Position	Gene_ID	SNP_Chr	mRNA_Gene_ID	lncRNA_ID	lncRNA_Gene_ID	Status	mRNA_ID	mRNA_Gene_ID	mRNA_Gene_Description	Pearson_correlation	Pvalue
Crossings	PZE-104092320	167437768	Zm00001d051829	4	Zm00001d051829	LNC_003726	XLOC_037792	lncRNA	Zm00001d051829_T001	Zm00001d051829	sp|Q9LM76|PUB44_ARATH U-box domain-containing protein 44 OS=Arabidopsis thaliana GN=PUB44 PE=1 SV=1//0	0.972852	1.10971e-07
Crossings	PZE-104092320	167437768	Zm00001d051829	4	Zm00001d051829	LNC_003993	XLOC_040594	lncRNA	Zm00001d051829_T001	Zm00001d051829	sp|Q9LM76|PUB44_ARATH U-box domain-containing protein 44 OS=Arabidopsis thaliana GN=PUB44 PE=1 SV=1//0	0.962554	5.44448e-07
Crossings	PZE-104092320	167437768	Zm00001d051829	4	Zm00001d051829	LNC_004499	XLOC_045008	lncRNA	Zm00001d051829_T001	Zm00001d051829	sp|Q9LM76|PUB44_ARATH U-box domain-containing protein 44 OS=Arabidopsis thaliana GN=PUB44 PE=1 SV=1//0	0.954766	1.3821e-06
Crossings	PZE-104092320	167437768	Zm00001d051829	4	Zm00001d051829	LNC_001511	XLOC_014852	lncRNA	Zm00001d051829_T001	Zm00001d051829	sp|Q9LM76|PUB44_ARATH U-box domain-containing protein 44 OS=Arabidopsis thaliana GN=PUB44 PE=1 SV=1//0	0.951841	1.88136e-06
Crossings	PZE-104092320	167437768	Zm00001d051829	4	Zm00001d051829	LNC_003815	XLOC_038753	lncRNA	Zm00001d051829_T001	Zm00001d051829	sp|Q9LM76|PUB44_ARATH U-box domain-containing protein 44 OS=Arabidopsis thaliana GN=PUB44 PE=1 SV=1//0	0.9502	2.21813e-06
Crossings	PZE-104092320	167437768	Zm00001d051829	4	Zm00001d051829	LNC_001776	XLOC_017735	lncRNA	Zm00001d051829_T001	Zm00001d051829	sp|Q9LM76|PUB44_ARATH U-box domain-containing protein 44 OS=Arabidopsis thaliana GN=PUB44 PE=1 SV=1//0	0.959418	8.09709e-07
Crossings	PZE-104092320	167437768	Zm00001d051829	4	Zm00001d051829	LNC_004001	XLOC_040594	lncRNA	Zm00001d051829_T001	Zm00001d051829	sp|Q9LM76|PUB44_ARATH U-box domain-containing protein 44 OS=Arabidopsis thaliana GN=PUB44 PE=1 SV=1//0	0.962927	5.1823e-07
Crossings	PZE-104092320	167437768	Zm00001d051829	4	Zm00001d051829	LNC_002979	XLOC_029469	lncRNA	Zm00001d051829_T001	Zm00001d051829	sp|Q9LM76|PUB44_ARATH U-box domain-containing protein 44 OS=Arabidopsis thaliana GN=PUB44 PE=1 SV=1//0	-0.954002	1.50095e-06
Crossings	PZE-104092320	167437768	Zm00001d051829	4	Zm00001d051829	LNC_004385	XLOC_044041	lncRNA	Zm00001d051829_T001	Zm00001d051829	sp|Q9LM76|PUB44_ARATH U-box domain-containing protein 44 OS=Arabidopsis thaliana GN=PUB44 PE=1 SV=1//0	0.959963	7.57477e-07
Crossings	PZE-104092320	167437768	Zm00001d051829	4	Zm00001d051829	LNC_002708	XLOC_026883	lncRNA	Zm00001d051829_T001	Zm00001d051829	sp|Q9LM76|PUB44_ARATH U-box domain-containing protein 44 OS=Arabidopsis thaliana GN=PUB44 PE=1 SV=1//0	0.966243	3.26193e-07
Crossings	PZE-104092320	167437768	Zm00001d051829	4	Zm00001d051829	LNC_005465	XLOC_054804	lncRNA	Zm00001d051829_T001	Zm00001d051829	sp|Q9LM76|PUB44_ARATH U-box domain-containing protein 44 OS=Arabidopsis thaliana GN=PUB44 PE=1 SV=1//0	0.961929	5.90865e-07
Crossings	PZE-104092320	167437768	Zm00001d051829	4	Zm00001d051829	LNC_005390	XLOC_054315	lncRNA	Zm00001d051829_T001	Zm00001d051829	sp|Q9LM76|PUB44_ARATH U-box domain-containing protein 44 OS=Arabidopsis thaliana GN=PUB44 PE=1 SV=1//0	0.958343	9.2103e-07
Crossings	PZE-104092320	167437768	Zm00001d051829	4	Zm00001d051829	LNC_001724	XLOC_016935	lncRNA	Zm00001d051829_T001	Zm00001d051829	sp|Q9LM76|PUB44_ARATH U-box domain-containing protein 44 OS=Arabidopsis thaliana GN=PUB44 PE=1 SV=1//0	0.957856	9.75384e-07
Crossings	PZE-104092320	167437768	Zm00001d051829	4	Zm00001d051829	LNC_004368	XLOC_043850	lncRNA	Zm00001d051829_T001	Zm00001d051829	sp|Q9LM76|PUB44_ARATH U-box domain-containing protein 44 OS=Arabidopsis thaliana GN=PUB44 PE=1 SV=1//0	0.964585	4.13414e-07
Crossings	PZE-104092320	167437768	Zm00001d051829	4	Zm00001d051829	LNC_003965	XLOC_040264	lncRNA	Zm00001d051829_T001	Zm00001d051829	sp|Q9LM76|PUB44_ARATH U-box domain-containing protein 44 OS=Arabidopsis thaliana GN=PUB44 PE=1 SV=1//0	0.967532	2.69068e-07
Crossings	PZE-104092320	167437768	Zm00001d051829	4	Zm00001d051829	LNC_004294	XLOC_043457	lncRNA	Zm00001d051829_T001	Zm00001d051829	sp|Q9LM76|PUB44_ARATH U-box domain-containing protein 44 OS=Arabidopsis thaliana GN=PUB44 PE=1 SV=1//0	0.951814	1.88642e-06
Crossings	PZE-104092320	167437768	Zm00001d051829	4	Zm00001d051829	LNC_004573	XLOC_045983	lncRNA	Zm00001d051829_T001	Zm00001d051829	sp|Q9LM76|PUB44_ARATH U-box domain-containing protein 44 OS=Arabidopsis thaliana GN=PUB44 PE=1 SV=1//0	0.979037	3.07797e-08
Crossings	PZE-104092320	167437768	Zm00001d051829	4	Zm00001d051829	LNC_005020	XLOC_050213	lncRNA	Zm00001d051829_T001	Zm00001d051829	sp|Q9LM76|PUB44_ARATH U-box domain-containing protein 44 OS=Arabidopsis thaliana GN=PUB44 PE=1 SV=1//0	0.95068	2.11508e-06
Crossings	PZE-104092320	167437768	Zm00001d051829	4	Zm00001d051829	LNC_004974	XLOC_049751	lncRNA	Zm00001d051829_T001	Zm00001d051829	sp|Q9LM76|PUB44_ARATH U-box domain-containing protein 44 OS=Arabidopsis thaliana GN=PUB44 PE=1 SV=1//0	0.951855	1.87859e-06
Crossings	PZE-104092320	167437768	Zm00001d051829	4	Zm00001d051829	LNC_003995	XLOC_040594	lncRNA	Zm00001d051829_T001	Zm00001d051829	sp|Q9LM76|PUB44_ARATH U-box domain-containing protein 44 OS=Arabidopsis thaliana GN=PUB44 PE=1 SV=1//0	0.963936	4.52196e-07
Crossings	PZE-104092320	167437768	Zm00001d051829	4	Zm00001d051829	LNC_002805	XLOC_027903	lncRNA	Zm00001d051829_T001	Zm00001d051829	sp|Q9LM76|PUB44_ARATH U-box domain-containing protein 44 OS=Arabidopsis thaliana GN=PUB44 PE=1 SV=1//0	0.984647	6.54747e-09
Crossings	PZE-104092320	167437768	Zm00001d051829	4	Zm00001d051829	LNC_005330	XLOC_053540	lncRNA	Zm00001d051829_T001	Zm00001d051829	sp|Q9LM76|PUB44_ARATH U-box domain-containing protein 44 OS=Arabidopsis thaliana GN=PUB44 PE=1 SV=1//0	0.986212	3.83456e-09
Crossings	PZE-104092320	167437768	Zm00001d051829	4	Zm00001d051829	LNC_004794	XLOC_047923	lncRNA	Zm00001d051829_T001	Zm00001d051829	sp|Q9LM76|PUB44_ARATH U-box domain-containing protein 44 OS=Arabidopsis thaliana GN=PUB44 PE=1 SV=1//0	0.951389	1.96974e-06
Crossings	PZE-104092320	167437768	Zm00001d051829	4	Zm00001d051829	LNC_005149	XLOC_051653	lncRNA	Zm00001d051829_T001	Zm00001d051829	sp|Q9LM76|PUB44_ARATH U-box domain-containing protein 44 OS=Arabidopsis thaliana GN=PUB44 PE=1 SV=1//0	-0.951964	1.85784e-06
Crossings	PZE-104092320	167437768	Zm00001d051829	4	Zm00001d051829	LNC_003317	XLOC_032977	lncRNA	Zm00001d051829_T001	Zm00001d051829	sp|Q9LM76|PUB44_ARATH U-box domain-containing protein 44 OS=Arabidopsis thaliana GN=PUB44 PE=1 SV=1//0	0.954081	1.4883e-06
Crossings	PZE-104092320	167437768	Zm00001d051829	4	Zm00001d051829	LNC_001789	XLOC_017858	lncRNA	Zm00001d051829_T001	Zm00001d051829	sp|Q9LM76|PUB44_ARATH U-box domain-containing protein 44 OS=Arabidopsis thaliana GN=PUB44 PE=1 SV=1//0	-0.958302	9.25541e-07
Crossings	PZE-104092320	167437768	Zm00001d051829	4	Zm00001d051829	LNC_005417	XLOC_054522	lncRNA	Zm00001d051829_T001	Zm00001d051829	sp|Q9LM76|PUB44_ARATH U-box domain-containing protein 44 OS=Arabidopsis thaliana GN=PUB44 PE=1 SV=1//0	-0.953132	1.64589e-06
Crossings	PZE-104092320	167437768	Zm00001d051829	4	Zm00001d051829	LNC_005418	XLOC_054523	lncRNA	Zm00001d051829_T001	Zm00001d051829	sp|Q9LM76|PUB44_ARATH U-box domain-containing protein 44 OS=Arabidopsis thaliana GN=PUB44 PE=1 SV=1//0	-0.963481	4.81118e-07
Crossings	PZE-104092320	167437768	Zm00001d051829	4	Zm00001d051829	LNC_001118	XLOC_011168	lncRNA	Zm00001d051829_T001	Zm00001d051829	sp|Q9LM76|PUB44_ARATH U-box domain-containing protein 44 OS=Arabidopsis thaliana GN=PUB44 PE=1 SV=1//0	0.967931	2.53132e-07
Crossings	PZE-104092320	167437768	Zm00001d051829	4	Zm00001d051829	LNC_006063	XLOC_060273	lncRNA	Zm00001d051829_T001	Zm00001d051829	sp|Q9LM76|PUB44_ARATH U-box domain-containing protein 44 OS=Arabidopsis thaliana GN=PUB44 PE=1 SV=1//0	0.956966	1.08122e-06
Crossings	PZE-104092320	167437768	Zm00001d051829	4	Zm00001d051829	LNC_000306	XLOC_003208	lncRNA	Zm00001d051829_T001	Zm00001d051829	sp|Q9LM76|PUB44_ARATH U-box domain-containing protein 44 OS=Arabidopsis thaliana GN=PUB44 PE=1 SV=1//0	-0.951022	2.04386e-06
Crossings	PZE-104092320	167437768	Zm00001d051829	4	Zm00001d051829	LNC_005539	XLOC_055399	lncRNA	Zm00001d051829_T001	Zm00001d051829	sp|Q9LM76|PUB44_ARATH U-box domain-containing protein 44 OS=Arabidopsis thaliana GN=PUB44 PE=1 SV=1//0	0.987094	2.75924e-09
Crossings	PZE-104092320	167437768	Zm00001d051829	4	Zm00001d051829	LNC_005959	XLOC_059578	lncRNA	Zm00001d051829_T001	Zm00001d051829	sp|Q9LM76|PUB44_ARATH U-box domain-containing protein 44 OS=Arabidopsis thaliana GN=PUB44 PE=1 SV=1//0	0.966513	3.13509e-07
Crossings	PZE-104092320	167437768	Zm00001d051829	4	Zm00001d051829	LNC_001740	XLOC_017211	lncRNA	Zm00001d051829_T001	Zm00001d051829	sp|Q9LM76|PUB44_ARATH U-box domain-containing protein 44 OS=Arabidopsis thaliana GN=PUB44 PE=1 SV=1//0	0.962483	5.4957e-07
Crossings	PZE-104092320	167437768	Zm00001d051829	4	Zm00001d051829	LNC_002994	XLOC_029618	lncRNA	Zm00001d051829_T001	Zm00001d051829	sp|Q9LM76|PUB44_ARATH U-box domain-containing protein 44 OS=Arabidopsis thaliana GN=PUB44 PE=1 SV=1//0	0.952937	1.67992e-06
Crossings	PZE-104092320	167437768	Zm00001d051829	4	Zm00001d051829	LNC_005320	XLOC_053365	lncRNA	Zm00001d051829_T001	Zm00001d051829	sp|Q9LM76|PUB44_ARATH U-box domain-containing protein 44 OS=Arabidopsis thaliana GN=PUB44 PE=1 SV=1//0	0.971848	1.32837e-07
Crossings	PZE-104092320	167437768	Zm00001d051692	4	Zm00001d051692	LNC_003726	XLOC_037792	lncRNA	Zm00001d051692_T001	Zm00001d051692	sp|Q9LHE3|ASPG2_ARATH Protein ASPARTIC PROTEASE IN GUARD CELL 2 OS=Arabidopsis thaliana GN=ASPG2 PE=2 SV=1//5.14598e-65	0.954711	1.39046e-06
Crossings	PZE-104092320	167437768	Zm00001d051692	4	Zm00001d051692	LNC_004895	XLOC_049165	lncRNA	Zm00001d051692_T001	Zm00001d051692	sp|Q9LHE3|ASPG2_ARATH Protein ASPARTIC PROTEASE IN GUARD CELL 2 OS=Arabidopsis thaliana GN=ASPG2 PE=2 SV=1//5.14598e-65	0.957765	9.85859e-07
Crossings	PZE-104092320	167437768	Zm00001d051598	4	Zm00001d051598	LNC_003913	XLOC_039752	lncRNA	Zm00001d051598_T001	Zm00001d051598	sp|O22227|MIZ1_ARATH Protein MIZU-KUSSEI 1 OS=Arabidopsis thaliana GN=MIZ1 PE=1 SV=1//3.36142e-53	0.953587	1.56869e-06
Crossings	PZE-104092320	167437768	Zm00001d051598	4	Zm00001d051598	LNC_003604	XLOC_036159	lncRNA	Zm00001d051598_T001	Zm00001d051598	sp|O22227|MIZ1_ARATH Protein MIZU-KUSSEI 1 OS=Arabidopsis thaliana GN=MIZ1 PE=1 SV=1//3.36142e-53	0.953429	1.59524e-06
Crossings	PZE-104092320	167437768	Zm00001d051598	4	Zm00001d051598	LNC_003621	XLOC_036316	lncRNA	Zm00001d051598_T001	Zm00001d051598	sp|O22227|MIZ1_ARATH Protein MIZU-KUSSEI 1 OS=Arabidopsis thaliana GN=MIZ1 PE=1 SV=1//3.36142e-53	0.96158	6.1805e-07
Crossings	PZE-104092320	167437768	Zm00001d051598	4	Zm00001d051598	LNC_001392	XLOC_013970	lncRNA	Zm00001d051598_T001	Zm00001d051598	sp|O22227|MIZ1_ARATH Protein MIZU-KUSSEI 1 OS=Arabidopsis thaliana GN=MIZ1 PE=1 SV=1//3.36142e-53	0.966143	3.31e-07
Crossings	PZE-104092320	167437768	Zm00001d051598	4	Zm00001d051598	LNC_004635	XLOC_046493	lncRNA	Zm00001d051598_T001	Zm00001d051598	sp|O22227|MIZ1_ARATH Protein MIZU-KUSSEI 1 OS=Arabidopsis thaliana GN=MIZ1 PE=1 SV=1//3.36142e-53	0.96799	2.50821e-07
Crossings	PZE-104092320	167437768	Zm00001d051598	4	Zm00001d051598	LNC_003098	XLOC_030855	lncRNA	Zm00001d051598_T001	Zm00001d051598	sp|O22227|MIZ1_ARATH Protein MIZU-KUSSEI 1 OS=Arabidopsis thaliana GN=MIZ1 PE=1 SV=1//3.36142e-53	0.953521	1.57978e-06
Crossings	PZE-104092320	167437768	Zm00001d051598	4	Zm00001d051598	LNC_002050	XLOC_020176	lncRNA	Zm00001d051598_T001	Zm00001d051598	sp|O22227|MIZ1_ARATH Protein MIZU-KUSSEI 1 OS=Arabidopsis thaliana GN=MIZ1 PE=1 SV=1//3.36142e-53	0.951897	1.87058e-06
Crossings	PZE-104092320	167437768	Zm00001d051598	4	Zm00001d051598	LNC_006204	XLOC_061757	lncRNA	Zm00001d051598_T001	Zm00001d051598	sp|O22227|MIZ1_ARATH Protein MIZU-KUSSEI 1 OS=Arabidopsis thaliana GN=MIZ1 PE=1 SV=1//3.36142e-53	0.958935	8.58354e-07
Crossings	PZE-104092320	167437768	Zm00001d051598	4	Zm00001d051598	LNC_001904	XLOC_018731	lncRNA	Zm00001d051598_T001	Zm00001d051598	sp|O22227|MIZ1_ARATH Protein MIZU-KUSSEI 1 OS=Arabidopsis thaliana GN=MIZ1 PE=1 SV=1//3.36142e-53	0.960515	7.07333e-07
Crossings	PZE-104092320	167437768	Zm00001d051598	4	Zm00001d051598	LNC_003387	XLOC_033873	lncRNA	Zm00001d051598_T001	Zm00001d051598	sp|O22227|MIZ1_ARATH Protein MIZU-KUSSEI 1 OS=Arabidopsis thaliana GN=MIZ1 PE=1 SV=1//3.36142e-53	0.96078	6.84207e-07
Crossings	PZE-104092320	167437768	Zm00001d051598	4	Zm00001d051598	LNC_001917	XLOC_018786	lncRNA	Zm00001d051598_T001	Zm00001d051598	sp|O22227|MIZ1_ARATH Protein MIZU-KUSSEI 1 OS=Arabidopsis thaliana GN=MIZ1 PE=1 SV=1//3.36142e-53	0.957172	1.05592e-06
Crossings	PZE-104092320	167437768	Zm00001d051598	4	Zm00001d051598	LNC_004412	XLOC_044243	lncRNA	Zm00001d051598_T001	Zm00001d051598	sp|O22227|MIZ1_ARATH Protein MIZU-KUSSEI 1 OS=Arabidopsis thaliana GN=MIZ1 PE=1 SV=1//3.36142e-53	0.984789	6.25228e-09
Crossings	PZE-104092320	167437768	Zm00001d051598	4	Zm00001d051598	LNC_003316	XLOC_032976	lncRNA	Zm00001d051598_T001	Zm00001d051598	sp|O22227|MIZ1_ARATH Protein MIZU-KUSSEI 1 OS=Arabidopsis thaliana GN=MIZ1 PE=1 SV=1//3.36142e-53	0.953839	1.52733e-06
Crossings	PZE-104092320	167437768	Zm00001d051598	4	Zm00001d051598	LNC_003008	XLOC_029777	lncRNA	Zm00001d051598_T001	Zm00001d051598	sp|O22227|MIZ1_ARATH Protein MIZU-KUSSEI 1 OS=Arabidopsis thaliana GN=MIZ1 PE=1 SV=1//3.36142e-53	0.964741	4.04465e-07
Crossings	PZE-104092320	167437768	Zm00001d051598	4	Zm00001d051598	LNC_004933	XLOC_049500	lncRNA	Zm00001d051598_T001	Zm00001d051598	sp|O22227|MIZ1_ARATH Protein MIZU-KUSSEI 1 OS=Arabidopsis thaliana GN=MIZ1 PE=1 SV=1//3.36142e-53	0.972034	1.28544e-07
Crossings	PZE-104092320	167437768	Zm00001d051598	4	Zm00001d051598	LNC_004758	XLOC_047542	lncRNA	Zm00001d051598_T001	Zm00001d051598	sp|O22227|MIZ1_ARATH Protein MIZU-KUSSEI 1 OS=Arabidopsis thaliana GN=MIZ1 PE=1 SV=1//3.36142e-53	0.963256	4.95924e-07
Crossings	PZE-104092320	167437768	Zm00001d051598	4	Zm00001d051598	LNC_001646	XLOC_015970	lncRNA	Zm00001d051598_T001	Zm00001d051598	sp|O22227|MIZ1_ARATH Protein MIZU-KUSSEI 1 OS=Arabidopsis thaliana GN=MIZ1 PE=1 SV=1//3.36142e-53	0.972327	1.22003e-07
Crossings	PZE-104092320	167437768	Zm00001d051598	4	Zm00001d051598	LNC_005629	XLOC_056264	lncRNA	Zm00001d051598_T001	Zm00001d051598	sp|O22227|MIZ1_ARATH Protein MIZU-KUSSEI 1 OS=Arabidopsis thaliana GN=MIZ1 PE=1 SV=1//3.36142e-53	0.957675	9.96159e-07
Crossings	PZE-104092320	167437768	Zm00001d051598	4	Zm00001d051598	LNC_003472	XLOC_034922	lncRNA	Zm00001d051598_T001	Zm00001d051598	sp|O22227|MIZ1_ARATH Protein MIZU-KUSSEI 1 OS=Arabidopsis thaliana GN=MIZ1 PE=1 SV=1//3.36142e-53	0.971183	1.49111e-07
Crossings	PZE-104092320	167437768	Zm00001d051598	4	Zm00001d051598	LNC_004908	XLOC_049273	lncRNA	Zm00001d051598_T001	Zm00001d051598	sp|O22227|MIZ1_ARATH Protein MIZU-KUSSEI 1 OS=Arabidopsis thaliana GN=MIZ1 PE=1 SV=1//3.36142e-53	0.971978	1.29824e-07
Forks	PZE-104043052	61411237	Zm00001d049995	4	Zm00001d049995	LNC_005064	XLOC_050824	lncRNA	Zm00001d049995_T001	Zm00001d049995	sp|P16081|NIA1_ORYSJ Nitrate reductase [NADH] 1 OS=Oryza sativa subsp. japonica GN=NIA1 PE=2 SV=3//3.64673e-54	0.962617	5.39979e-07
Forks	PZE-104043052	61411237	Zm00001d049995	4	Zm00001d049995	LNC_000535	XLOC_005909	lncRNA	Zm00001d049995_T001	Zm00001d049995	sp|P16081|NIA1_ORYSJ Nitrate reductase [NADH] 1 OS=Oryza sativa subsp. japonica GN=NIA1 PE=2 SV=3//3.64673e-54	0.966471	3.15459e-07
Forks	PZE-104043052	61411237	Zm00001d049995	4	Zm00001d049995	LNC_004754	XLOC_047475	lncRNA	Zm00001d049995_T001	Zm00001d049995	sp|P16081|NIA1_ORYSJ Nitrate reductase [NADH] 1 OS=Oryza sativa subsp. japonica GN=NIA1 PE=2 SV=3//3.64673e-54	0.960075	7.47093e-07
Forks	PZE-104043052	61411237	Zm00001d049995	4	Zm00001d049995	LNC_000843	XLOC_008675	lncRNA	Zm00001d049995_T001	Zm00001d049995	sp|P16081|NIA1_ORYSJ Nitrate reductase [NADH] 1 OS=Oryza sativa subsp. japonica GN=NIA1 PE=2 SV=3//3.64673e-54	0.961956	5.88741e-07
Forks	PZE-104043052	61411237	Zm00001d049995	4	Zm00001d049995	LNC_006052	XLOC_060175	lncRNA	Zm00001d049995_T001	Zm00001d049995	sp|P16081|NIA1_ORYSJ Nitrate reductase [NADH] 1 OS=Oryza sativa subsp. japonica GN=NIA1 PE=2 SV=3//3.64673e-54	0.951024	2.04359e-06
PRL	ZM005894-0463	31060531	Zm00001d049502	4	Zm00001d049502	LNC_003726	XLOC_037792	lncRNA	Zm00001d049502_T001	Zm00001d049502	-//-	0.965715	3.52189e-07
PRL	ZM005894-0463	31060531	Zm00001d049502	4	Zm00001d049502	LNC_005390	XLOC_054315	lncRNA	Zm00001d049502_T001	Zm00001d049502	-//-	0.959289	8.22462e-07
PRL	ZM005894-0463	31060531	Zm00001d049502	4	Zm00001d049502	LNC_003965	XLOC_040264	lncRNA	Zm00001d049502_T001	Zm00001d049502	-//-	0.96227	5.65178e-07
PRL	ZM005894-0463	31060531	Zm00001d049502	4	Zm00001d049502	LNC_004573	XLOC_045983	lncRNA	Zm00001d049502_T001	Zm00001d049502		0.953053	1.65956e-06
PRL	ZM005894-0463	31060531	Zm00001d049502	4	Zm00001d049502	LNC_005330	XLOC_053540	lncRNA	Zm00001d049502_T001	Zm00001d049502	-//-	0.957932	9.66722e-07
PRL	ZM005894-0463	31060531	Zm00001d049502	4	Zm00001d049502	LNC_004965	XLOC_049703	lncRNA	Zm00001d049502_T001	Zm00001d049502	-//-	0.976939	4.9421e-08
PRL	ZM005894-0463	31060531	Zm00001d049502	4	Zm00001d049502	LNC_004422	XLOC_044382	lncRNA	Zm00001d049502_T001	Zm00001d049502	-//-	-0.951962	1.85822e-06
PRL	ZM005894-0463	31060531	Zm00001d049502	4	Zm00001d049502	LNC_002860	XLOC_028487	lncRNA	Zm00001d049502_T001	Zm00001d049502	-//-	-0.952734	1.71589e-06
PRL	ZM005894-0463	31060531	Zm00001d049502	4	Zm00001d049502	LNC_004781	XLOC_047801	lncRNA	Zm00001d049502_T001	Zm00001d049502	-//-	-0.976833	5.0554e-08
PRL	ZM005894-0463	31060531	Zm00001d049502	4	Zm00001d049502	LNC_002490	XLOC_024788	lncRNA	Zm00001d049502_T001	Zm00001d049502	-//-	0.95188	1.87381e-06
PRL	ZM005894-0463	31060531	Zm00001d049502	4	Zm00001d049502	LNC_003317	XLOC_032977	lncRNA	Zm00001d049502_T001	Zm00001d049502	-//-	0.950226	2.21252e-06
PRL	ZM005894-0463	31060531	Zm00001d049502	4	Zm00001d049502	LNC_005418	XLOC_054523	lncRNA	Zm00001d049502_T001	Zm00001d049502	-//-	-0.95074	2.10238e-06
PRL	ZM005894-0463	31060531	Zm00001d049502	4	Zm00001d049502	LNC_005539	XLOC_055399	lncRNA	Zm00001d049502_T001	Zm00001d049502	-//-	0.950349	2.18586e-06
PRL	ZM005894-0463	31060531	Zm00001d049502	4	Zm00001d049502	LNC_002994	XLOC_029618	lncRNA	Zm00001d049502_T001	Zm00001d049502	-//-	0.970581	1.65184e-07
PRL	ZM005894-0463	31060531	Zm00001d049502	4	Zm00001d049502	LNC_005320	XLOC_053365	lncRNA	Zm00001d049502_T001	Zm00001d049502	-//-	0.960308	7.25777e-07
PRL	ZM005894-0463	31060531	Zm00001d049464	4	Zm00001d049464	LNC_001763	XLOC_017581	lncRNA	Zm00001d049464_T001	Zm00001d049464	sp|O82256|COL13_ARATH Zinc finger protein CONSTANS-LIKE 13 OS=Arabidopsis thaliana GN=COL13 PE=2 SV=1//3.11678e-07	0.972982	1.0835e-07
PRL	ZM005894-0463	31060531	Zm00001d049464	4	Zm00001d049464	LNC_003621	XLOC_036316	lncRNA	Zm00001d049464_T001	Zm00001d049464	sp|O82256|COL13_ARATH Zinc finger protein CONSTANS-LIKE 13 OS=Arabidopsis thaliana GN=COL13 PE=2 SV=1//3.11678e-07	0.960926	6.71731e-07
PRL	ZM005894-0463	31060531	Zm00001d049464	4	Zm00001d049464	LNC_004635	XLOC_046493	lncRNA	Zm00001d049464_T001	Zm00001d049464	sp|O82256|COL13_ARATH Zinc finger protein CONSTANS-LIKE 13 OS=Arabidopsis thaliana GN=COL13 PE=2 SV=1//3.11678e-07	0.950637	2.12419e-06
PRL	ZM005894-0463	31060531	Zm00001d049464	4	Zm00001d049464	LNC_003098	XLOC_030855	lncRNA	Zm00001d049464_T001	Zm00001d049464	sp|O82256|COL13_ARATH Zinc finger protein CONSTANS-LIKE 13 OS=Arabidopsis thaliana GN=COL13 PE=2 SV=1//3.11678e-07	0.964852	3.98214e-07
PRL	ZM005894-0463	31060531	Zm00001d049464	4	Zm00001d049464	LNC_002050	XLOC_020176	lncRNA	Zm00001d049464_T001	Zm00001d049464	sp|O82256|COL13_ARATH Zinc finger protein CONSTANS-LIKE 13 OS=Arabidopsis thaliana GN=COL13 PE=2 SV=1//3.11678e-07	0.966116	3.32324e-07
PRL	ZM005894-0463	31060531	Zm00001d049464	4	Zm00001d049464	LNC_002709	XLOC_026884	lncRNA	Zm00001d049464_T001	Zm00001d049464	sp|O82256|COL13_ARATH Zinc finger protein CONSTANS-LIKE 13 OS=Arabidopsis thaliana GN=COL13 PE=2 SV=1//3.11678e-07	0.966085	3.33824e-07
PRL	ZM005894-0463	31060531	Zm00001d049464	4	Zm00001d049464	LNC_005047	XLOC_050563	lncRNA	Zm00001d049464_T001	Zm00001d049464	sp|O82256|COL13_ARATH Zinc finger protein CONSTANS-LIKE 13 OS=Arabidopsis thaliana GN=COL13 PE=2 SV=1//3.11678e-07	0.956406	1.15232e-06
PRL	ZM005894-0463	31060531	Zm00001d049464	4	Zm00001d049464	LNC_003317	XLOC_032977	lncRNA	Zm00001d049464_T001	Zm00001d049464	sp|O82256|COL13_ARATH Zinc finger protein CONSTANS-LIKE 13 OS=Arabidopsis thaliana GN=COL13 PE=2 SV=1//3.11678e-07	0.95118	2.01177e-06
PRL	ZM005894-0463	31060531	Zm00001d049464	4	Zm00001d049464	LNC_004933	XLOC_049500	lncRNA	Zm00001d049464_T001	Zm00001d049464	sp|O82256|COL13_ARATH Zinc finger protein CONSTANS-LIKE 13 OS=Arabidopsis thaliana GN=COL13 PE=2 SV=1//3.11678e-07	0.957722	9.90715e-07
PRL	ZM005894-0463	31060531	Zm00001d049464	4	Zm00001d049464	LNC_001646	XLOC_015970	lncRNA	Zm00001d049464_T001	Zm00001d049464	sp|O82256|COL13_ARATH Zinc finger protein CONSTANS-LIKE 13 OS=Arabidopsis thaliana GN=COL13 PE=2 SV=1//3.11678e-07	0.959742	7.78301e-07
PRL	ZM005894-0463	31060531	Zm00001d049464	4	Zm00001d049464	LNC_005629	XLOC_056264	lncRNA	Zm00001d049464_T001	Zm00001d049464	sp|O82256|COL13_ARATH Zinc finger protein CONSTANS-LIKE 13 OS=Arabidopsis thaliana GN=COL13 PE=2 SV=1//3.11678e-07	0.960458	7.12331e-07
PRL	ZM005894-0463	31060531	Zm00001d049464	4	Zm00001d049464	LNC_001633	XLOC_015806	lncRNA	Zm00001d049464_T001	Zm00001d049464	sp|O82256|COL13_ARATH Zinc finger protein CONSTANS-LIKE 13 OS=Arabidopsis thaliana GN=COL13 PE=2 SV=1//3.11678e-07	0.954724	1.38851e-06
PRL	ZM005894-0463	31060531	Zm00001d049464	4	Zm00001d049464	LNC_000207	XLOC_002089	lncRNA	Zm00001d049464_T001	Zm00001d049464	sp|O82256|COL13_ARATH Zinc finger protein CONSTANS-LIKE 13 OS=Arabidopsis thaliana GN=COL13 PE=2 SV=1//3.11678e-07	0.951028	2.04267e-06
PRL	ZM005894-0463	31060531	Zm00001d049380	4	Zm00001d049380	LNC_005870	XLOC_058559	lncRNA	Zm00001d049380_T008	Zm00001d049380	sp|B8BBZ7|GATP3_ORYSI Probable gamma-aminobutyrate transaminase 3, mitochondrial OS=Oryza sativa subsp. indica GN=OsI_28220 PE=3 SV=1//2.59312e-34	0.959233	8.28071e-07
PRL	ZM005894-0463	31060531	Zm00001d049380	4	Zm00001d049380	LNC_001794	XLOC_017929	lncRNA	Zm00001d049380_T007	Zm00001d049380	sp|B8BBZ7|GATP3_ORYSI Probable gamma-aminobutyrate transaminase 3, mitochondrial OS=Oryza sativa subsp. indica GN=OsI_28220 PE=3 SV=1//2.59312e-34	0.952263	1.80164e-06
PRL	ZM005894-0463	31060531	Zm00001d049365	4	Zm00001d049365	LNC_003173	XLOC_031581	lncRNA	Zm00001d049365_T001	Zm00001d049365	sp|Q9FV52|MAP1B_ARATH Methionine aminopeptidase 1B, chloroplastic OS=Arabidopsis thaliana GN=MAP1B PE=2 SV=2//4.93081e-135	0.977257	4.6126e-08
PRL	ZM005894-0463	31060531	Zm00001d049365	4	Zm00001d049365	LNC_001984	XLOC_019498	lncRNA	Zm00001d049365_T001	Zm00001d049365	sp|Q9FV52|MAP1B_ARATH Methionine aminopeptidase 1B, chloroplastic OS=Arabidopsis thaliana GN=MAP1B PE=2 SV=2//4.93081e-135	0.976042	5.97145e-08
PRL	ZM005894-0463	31060531	Zm00001d049365	4	Zm00001d049365	LNC_003724	XLOC_037769	lncRNA	Zm00001d049365_T001	Zm00001d049365	sp|Q9FV52|MAP1B_ARATH Methionine aminopeptidase 1B, chloroplastic OS=Arabidopsis thaliana GN=MAP1B PE=2 SV=2//4.93081e-135	0.952027	1.84579e-06
PRL	ZM005894-0463	31060531	Zm00001d049365	4	Zm00001d049365	LNC_003902	XLOC_039634	lncRNA	Zm00001d049365_T001	Zm00001d049365	sp|Q9FV52|MAP1B_ARATH Methionine aminopeptidase 1B, chloroplastic OS=Arabidopsis thaliana GN=MAP1B PE=2 SV=2//4.93081e-135	0.951874	1.87496e-06
PRL	ZM005894-0463	31060531	Zm00001d049365	4	Zm00001d049365	LNC_003914	XLOC_039764	lncRNA	Zm00001d049365_T001	Zm00001d049365	sp|Q9FV52|MAP1B_ARATH Methionine aminopeptidase 1B, chloroplastic OS=Arabidopsis thaliana GN=MAP1B PE=2 SV=2//4.93081e-135	0.990454	6.14489e-10
PRL	ZM005894-0463	31060531	Zm00001d049365	4	Zm00001d049365	LNC_004922	XLOC_049409	lncRNA	Zm00001d049365_T001	Zm00001d049365	sp|Q9FV52|MAP1B_ARATH Methionine aminopeptidase 1B, chloroplastic OS=Arabidopsis thaliana GN=MAP1B PE=2 SV=2//4.93081e-135	0.964891	3.96055e-07
PRL	ZM005894-0463	31060531	Zm00001d049365	4	Zm00001d049365	LNC_004103	XLOC_041486	lncRNA	Zm00001d049365_T001	Zm00001d049365	sp|Q9FV52|MAP1B_ARATH Methionine aminopeptidase 1B, chloroplastic OS=Arabidopsis thaliana GN=MAP1B PE=2 SV=2//4.93081e-135	0.950397	2.17542e-06
PRL	ZM005894-0463	31060531	Zm00001d049365	4	Zm00001d049365	LNC_003457	XLOC_034787	lncRNA	Zm00001d049365_T001	Zm00001d049365	sp|Q9FV52|MAP1B_ARATH Methionine aminopeptidase 1B, chloroplastic OS=Arabidopsis thaliana GN=MAP1B PE=2 SV=2//4.93081e-135	0.962359	5.58628e-07
PRL	ZM005894-0463	31060531	Zm00001d049365	4	Zm00001d049365	LNC_001306	XLOC_012983	lncRNA	Zm00001d049365_T001	Zm00001d049365	sp|Q9FV52|MAP1B_ARATH Methionine aminopeptidase 1B, chloroplastic OS=Arabidopsis thaliana GN=MAP1B PE=2 SV=2//4.93081e-135	0.962014	5.84337e-07
PRL	ZM005894-0463	31060531	Zm00001d049365	4	Zm00001d049365	LNC_000824	XLOC_008529	lncRNA	Zm00001d049365_T001	Zm00001d049365	sp|Q9FV52|MAP1B_ARATH Methionine aminopeptidase 1B, chloroplastic OS=Arabidopsis thaliana GN=MAP1B PE=2 SV=2//4.93081e-135	0.960907	6.73317e-07
PRL	ZM005894-0463	31060531	Zm00001d049365	4	Zm00001d049365	LNC_003145	XLOC_031387	lncRNA	Zm00001d049365_T001	Zm00001d049365	sp|Q9FV52|MAP1B_ARATH Methionine aminopeptidase 1B, chloroplastic OS=Arabidopsis thaliana GN=MAP1B PE=2 SV=2//4.93081e-135	0.970349	1.71732e-07
PRL	ZM005894-0463	31060531	Zm00001d049365	4	Zm00001d049365	LNC_005281	XLOC_052904	lncRNA	Zm00001d049365_T001	Zm00001d049365	sp|Q9FV52|MAP1B_ARATH Methionine aminopeptidase 1B, chloroplastic OS=Arabidopsis thaliana GN=MAP1B PE=2 SV=2//4.93081e-135	0.960227	7.33097e-07
PRL	ZM005894-0463	31060531	Zm00001d049365	4	Zm00001d049365	LNC_004718	XLOC_047220	lncRNA	Zm00001d049365_T001	Zm00001d049365	sp|Q9FV52|MAP1B_ARATH Methionine aminopeptidase 1B, chloroplastic OS=Arabidopsis thaliana GN=MAP1B PE=2 SV=2//4.93081e-135	0.988644	1.45937e-09
PRL	ZM005894-0463	31060531	Zm00001d049365	4	Zm00001d049365	LNC_000942	XLOC_009660	lncRNA	Zm00001d049365_T001	Zm00001d049365	sp|Q9FV52|MAP1B_ARATH Methionine aminopeptidase 1B, chloroplastic OS=Arabidopsis thaliana GN=MAP1B PE=2 SV=2//4.93081e-135	0.966239	3.26375e-07
PRL	ZM005894-0463	31060531	Zm00001d049365	4	Zm00001d049365	LNC_005849	XLOC_058342	lncRNA	Zm00001d049365_T001	Zm00001d049365	sp|Q9FV52|MAP1B_ARATH Methionine aminopeptidase 1B, chloroplastic OS=Arabidopsis thaliana GN=MAP1B PE=2 SV=2//4.93081e-135	0.970654	1.6318e-07
PRL	ZM005894-0463	31060531	Zm00001d049365	4	Zm00001d049365	LNC_002548	XLOC_025292	lncRNA	Zm00001d049365_T001	Zm00001d049365	sp|Q9FV52|MAP1B_ARATH Methionine aminopeptidase 1B, chloroplastic OS=Arabidopsis thaliana GN=MAP1B PE=2 SV=2//4.93081e-135	0.952978	1.67265e-06
PRL	ZM005894-0463	31060531	Zm00001d049365	4	Zm00001d049365	LNC_005062	XLOC_050790	lncRNA	Zm00001d049365_T001	Zm00001d049365	sp|Q9FV52|MAP1B_ARATH Methionine aminopeptidase 1B, chloroplastic OS=Arabidopsis thaliana GN=MAP1B PE=2 SV=2//4.93081e-135	0.9561	1.19266e-06
PRL	ZM005894-0463	31060531	Zm00001d049365	4	Zm00001d049365	LNC_004482	XLOC_044827	lncRNA	Zm00001d049365_T001	Zm00001d049365	sp|Q9FV52|MAP1B_ARATH Methionine aminopeptidase 1B, chloroplastic OS=Arabidopsis thaliana GN=MAP1B PE=2 SV=2//4.93081e-135	0.957415	1.0267e-06
PRL	ZM005894-0463	31060531	Zm00001d049365	4	Zm00001d049365	LNC_001379	XLOC_013723	lncRNA	Zm00001d049365_T001	Zm00001d049365	sp|Q9FV52|MAP1B_ARATH Methionine aminopeptidase 1B, chloroplastic OS=Arabidopsis thaliana GN=MAP1B PE=2 SV=2//4.93081e-135	0.989164	1.15563e-09
PRL	ZM005894-0463	31060531	Zm00001d049365	4	Zm00001d049365	LNC_001173	XLOC_011730	lncRNA	Zm00001d049365_T001	Zm00001d049365	sp|Q9FV52|MAP1B_ARATH Methionine aminopeptidase 1B, chloroplastic OS=Arabidopsis thaliana GN=MAP1B PE=2 SV=2//4.93081e-135	0.97902	3.09032e-08
PRL	ZM005894-0463	31060531	Zm00001d049365	4	Zm00001d049365	LNC_000125	XLOC_001567	lncRNA	Zm00001d049365_T001	Zm00001d049365	sp|Q9FV52|MAP1B_ARATH Methionine aminopeptidase 1B, chloroplastic OS=Arabidopsis thaliana GN=MAP1B PE=2 SV=2//4.93081e-135	0.952851	1.69502e-06
PRL	ZM005894-0463	31060531	Zm00001d049365	4	Zm00001d049365	LNC_001264	XLOC_012511	lncRNA	Zm00001d049365_T001	Zm00001d049365	sp|Q9FV52|MAP1B_ARATH Methionine aminopeptidase 1B, chloroplastic OS=Arabidopsis thaliana GN=MAP1B PE=2 SV=2//4.93081e-135	0.980441	2.18133e-08
PRL	ZM005894-0463	31060531	Zm00001d049365	4	Zm00001d049365	LNC_004703	XLOC_047115	lncRNA	Zm00001d049365_T001	Zm00001d049365	sp|Q9FV52|MAP1B_ARATH Methionine aminopeptidase 1B, chloroplastic OS=Arabidopsis thaliana GN=MAP1B PE=2 SV=2//4.93081e-135	0.95779	9.82982e-07
PRL	ZM005894-0463	31060531	Zm00001d049365	4	Zm00001d049365	LNC_000426	XLOC_004655	lncRNA	Zm00001d049365_T001	Zm00001d049365	sp|Q9FV52|MAP1B_ARATH Methionine aminopeptidase 1B, chloroplastic OS=Arabidopsis thaliana GN=MAP1B PE=2 SV=2//4.93081e-135	0.978019	3.89483e-08
PRL	ZM005894-0463	31060531	Zm00001d049365	4	Zm00001d049365	LNC_001577	XLOC_015217	lncRNA	Zm00001d049365_T001	Zm00001d049365	sp|Q9FV52|MAP1B_ARATH Methionine aminopeptidase 1B, chloroplastic OS=Arabidopsis thaliana GN=MAP1B PE=2 SV=2//4.93081e-135	0.954489	1.42425e-06
PRL	ZM005894-0463	31060531	Zm00001d049365	4	Zm00001d049365	LNC_004832	XLOC_048339	lncRNA	Zm00001d049365_T001	Zm00001d049365	sp|Q9FV52|MAP1B_ARATH Methionine aminopeptidase 1B, chloroplastic OS=Arabidopsis thaliana GN=MAP1B PE=2 SV=2//4.93081e-135	0.976631	5.27765e-08
PRL	ZM005894-0463	31060531	Zm00001d049365	4	Zm00001d049365	LNC_005752	XLOC_057592	lncRNA	Zm00001d049365_T001	Zm00001d049365	sp|Q9FV52|MAP1B_ARATH Methionine aminopeptidase 1B, chloroplastic OS=Arabidopsis thaliana GN=MAP1B PE=2 SV=2//4.93081e-135	0.963027	5.11357e-07
PRL	ZM005894-0463	31060531	Zm00001d049365	4	Zm00001d049365	LNC_005534	XLOC_055344	lncRNA	Zm00001d049365_T001	Zm00001d049365	sp|Q9FV52|MAP1B_ARATH Methionine aminopeptidase 1B, chloroplastic OS=Arabidopsis thaliana GN=MAP1B PE=2 SV=2//4.93081e-135	0.981641	1.59284e-08
PRL	ZM005894-0463	31060531	Zm00001d049365	4	Zm00001d049365	LNC_002961	XLOC_029205	lncRNA	Zm00001d049365_T001	Zm00001d049365	sp|Q9FV52|MAP1B_ARATH Methionine aminopeptidase 1B, chloroplastic OS=Arabidopsis thaliana GN=MAP1B PE=2 SV=2//4.93081e-135	0.97982	2.54814e-08
PRL	ZM005894-0463	31060531	Zm00001d049365	4	Zm00001d049365	LNC_001814	XLOC_018022	lncRNA	Zm00001d049365_T001	Zm00001d049365	sp|Q9FV52|MAP1B_ARATH Methionine aminopeptidase 1B, chloroplastic OS=Arabidopsis thaliana GN=MAP1B PE=2 SV=2//4.93081e-135	0.970732	1.61022e-07
PRL	ZM005894-0463	31060531	Zm00001d049365	4	Zm00001d049365	LNC_000855	XLOC_008805	lncRNA	Zm00001d049365_T001	Zm00001d049365	sp|Q9FV52|MAP1B_ARATH Methionine aminopeptidase 1B, chloroplastic OS=Arabidopsis thaliana GN=MAP1B PE=2 SV=2//4.93081e-135	0.989041	1.22197e-09
PRL	ZM005894-0463	31060531	Zm00001d049365	4	Zm00001d049365	LNC_002146	XLOC_021442	lncRNA	Zm00001d049365_T001	Zm00001d049365	sp|Q9FV52|MAP1B_ARATH Methionine aminopeptidase 1B, chloroplastic OS=Arabidopsis thaliana GN=MAP1B PE=2 SV=2//4.93081e-135	0.979093	3.03778e-08
PRL	ZM005894-0463	31060531	Zm00001d049365	4	Zm00001d049365	LNC_003558	XLOC_035860	lncRNA	Zm00001d049365_T001	Zm00001d049365	sp|Q9FV52|MAP1B_ARATH Methionine aminopeptidase 1B, chloroplastic OS=Arabidopsis thaliana GN=MAP1B PE=2 SV=2//4.93081e-135	0.950137	2.23214e-06
PRL	ZM005894-0463	31060531	Zm00001d049365	4	Zm00001d049365	LNC_006064	XLOC_060276	lncRNA	Zm00001d049365_T001	Zm00001d049365	sp|Q9FV52|MAP1B_ARATH Methionine aminopeptidase 1B, chloroplastic OS=Arabidopsis thaliana GN=MAP1B PE=2 SV=2//4.93081e-135	0.962042	5.8225e-07
PRL	ZM005894-0463	31060531	Zm00001d049365	4	Zm00001d049365	LNC_003562	XLOC_035887	lncRNA	Zm00001d049365_T001	Zm00001d049365	sp|Q9FV52|MAP1B_ARATH Methionine aminopeptidase 1B, chloroplastic OS=Arabidopsis thaliana GN=MAP1B PE=2 SV=2//4.93081e-135	0.961385	6.33701e-07
PRL	ZM005894-0463	31060531	Zm00001d049365	4	Zm00001d049365	LNC_002560	XLOC_025354	lncRNA	Zm00001d049365_T001	Zm00001d049365	sp|Q9FV52|MAP1B_ARATH Methionine aminopeptidase 1B, chloroplastic OS=Arabidopsis thaliana GN=MAP1B PE=2 SV=2//4.93081e-135	0.971389	1.43915e-07
PRL	ZM005894-0463	31060531	Zm00001d049365	4	Zm00001d049365	LNC_001301	XLOC_012928	lncRNA	Zm00001d049365_T001	Zm00001d049365	sp|Q9FV52|MAP1B_ARATH Methionine aminopeptidase 1B, chloroplastic OS=Arabidopsis thaliana GN=MAP1B PE=2 SV=2//4.93081e-135	0.969864	1.86086e-07
PRL	ZM005894-0463	31060531	Zm00001d049365	4	Zm00001d049365	LNC_001722	XLOC_016871	lncRNA	Zm00001d049365_T001	Zm00001d049365	sp|Q9FV52|MAP1B_ARATH Methionine aminopeptidase 1B, chloroplastic OS=Arabidopsis thaliana GN=MAP1B PE=2 SV=2//4.93081e-135	0.951961	1.85831e-06
PRL	ZM005894-0463	31060531	Zm00001d049365	4	Zm00001d049365	LNC_001411	XLOC_014210	lncRNA	Zm00001d049365_T001	Zm00001d049365	sp|Q9FV52|MAP1B_ARATH Methionine aminopeptidase 1B, chloroplastic OS=Arabidopsis thaliana GN=MAP1B PE=2 SV=2//4.93081e-135	0.969474	1.98329e-07
PRL	ZM005894-0463	31060531	Zm00001d049365	4	Zm00001d049365	LNC_002917	XLOC_028860	lncRNA	Zm00001d049365_T001	Zm00001d049365	sp|Q9FV52|MAP1B_ARATH Methionine aminopeptidase 1B, chloroplastic OS=Arabidopsis thaliana GN=MAP1B PE=2 SV=2//4.93081e-135	0.978845	3.22051e-08
PRL	ZM005894-0463	31060531	Zm00001d049365	4	Zm00001d049365	LNC_001937	XLOC_018984	lncRNA	Zm00001d049365_T001	Zm00001d049365	sp|Q9FV52|MAP1B_ARATH Methionine aminopeptidase 1B, chloroplastic OS=Arabidopsis thaliana GN=MAP1B PE=2 SV=2//4.93081e-135	0.980498	2.14997e-08
PRL	ZM005894-0463	31060531	Zm00001d049365	4	Zm00001d049365	LNC_004218	XLOC_042444	lncRNA	Zm00001d049365_T001	Zm00001d049365	sp|Q9FV52|MAP1B_ARATH Methionine aminopeptidase 1B, chloroplastic OS=Arabidopsis thaliana GN=MAP1B PE=2 SV=2//4.93081e-135	0.966899	2.96054e-07
PRL	ZM005894-0463	31060531	Zm00001d049365	4	Zm00001d049365	LNC_000198	XLOC_002061	lncRNA	Zm00001d049365_T001	Zm00001d049365	sp|Q9FV52|MAP1B_ARATH Methionine aminopeptidase 1B, chloroplastic OS=Arabidopsis thaliana GN=MAP1B PE=2 SV=2//4.93081e-135	0.958339	9.21527e-07
PRL	ZM005894-0463	31060531	Zm00001d049365	4	Zm00001d049365	LNC_000191	XLOC_002022	lncRNA	Zm00001d049365_T001	Zm00001d049365	sp|Q9FV52|MAP1B_ARATH Methionine aminopeptidase 1B, chloroplastic OS=Arabidopsis thaliana GN=MAP1B PE=2 SV=2//4.93081e-135	0.959942	7.59411e-07
PRL	ZM005894-0463	31060531	Zm00001d049365	4	Zm00001d049365	LNC_002284	XLOC_022610	lncRNA	Zm00001d049365_T001	Zm00001d049365	sp|Q9FV52|MAP1B_ARATH Methionine aminopeptidase 1B, chloroplastic OS=Arabidopsis thaliana GN=MAP1B PE=2 SV=2//4.93081e-135	0.976326	5.62892e-08
PRL	ZM005894-0463	31060531	Zm00001d049365	4	Zm00001d049365	LNC_000738	XLOC_007612	lncRNA	Zm00001d049365_T001	Zm00001d049365	sp|Q9FV52|MAP1B_ARATH Methionine aminopeptidase 1B, chloroplastic OS=Arabidopsis thaliana GN=MAP1B PE=2 SV=2//4.93081e-135	0.990237	6.87166e-10
PRL	ZM005894-0463	31060531	Zm00001d049365	4	Zm00001d049365	LNC_003180	XLOC_031663	lncRNA	Zm00001d049365_T001	Zm00001d049365	sp|Q9FV52|MAP1B_ARATH Methionine aminopeptidase 1B, chloroplastic OS=Arabidopsis thaliana GN=MAP1B PE=2 SV=2//4.93081e-135	0.980763	2.00898e-08
PRL	ZM005894-0463	31060531	Zm00001d049365	4	Zm00001d049365	LNC_003187	XLOC_031734	lncRNA	Zm00001d049365_T001	Zm00001d049365	sp|Q9FV52|MAP1B_ARATH Methionine aminopeptidase 1B, chloroplastic OS=Arabidopsis thaliana GN=MAP1B PE=2 SV=2//4.93081e-135	0.963836	4.58422e-07
PRL	ZM005894-0463	31060531	Zm00001d049365	4	Zm00001d049365	LNC_005790	XLOC_057877	lncRNA	Zm00001d049365_T001	Zm00001d049365	sp|Q9FV52|MAP1B_ARATH Methionine aminopeptidase 1B, chloroplastic OS=Arabidopsis thaliana GN=MAP1B PE=2 SV=2//4.93081e-135	0.954497	1.42309e-06
PRL	ZM005894-0463	31060531	Zm00001d049365	4	Zm00001d049365	LNC_002907	XLOC_028818	lncRNA	Zm00001d049365_T001	Zm00001d049365	sp|Q9FV52|MAP1B_ARATH Methionine aminopeptidase 1B, chloroplastic OS=Arabidopsis thaliana GN=MAP1B PE=2 SV=2//4.93081e-135	0.988195	1.76992e-09
PRL	ZM005894-0463	31060531	Zm00001d049365	4	Zm00001d049365	LNC_003406	XLOC_034026	lncRNA	Zm00001d049365_T001	Zm00001d049365	sp|Q9FV52|MAP1B_ARATH Methionine aminopeptidase 1B, chloroplastic OS=Arabidopsis thaliana GN=MAP1B PE=2 SV=2//4.93081e-135	0.966029	3.36528e-07
PRL	ZM005894-0463	31060531	Zm00001d049365	4	Zm00001d049365	LNC_001900	XLOC_018697	lncRNA	Zm00001d049365_T001	Zm00001d049365	sp|Q9FV52|MAP1B_ARATH Methionine aminopeptidase 1B, chloroplastic OS=Arabidopsis thaliana GN=MAP1B PE=2 SV=2//4.93081e-135	0.974125	8.74686e-08
PRL	ZM005894-0463	31060531	Zm00001d049365	4	Zm00001d049365	LNC_005751	XLOC_057592	lncRNA	Zm00001d049365_T001	Zm00001d049365	sp|Q9FV52|MAP1B_ARATH Methionine aminopeptidase 1B, chloroplastic OS=Arabidopsis thaliana GN=MAP1B PE=2 SV=2//4.93081e-135	0.984246	7.44279e-09
PRL	ZM005894-0463	31060531	Zm00001d049365	4	Zm00001d049365	LNC_003607	XLOC_036171	lncRNA	Zm00001d049365_T001	Zm00001d049365	sp|Q9FV52|MAP1B_ARATH Methionine aminopeptidase 1B, chloroplastic OS=Arabidopsis thaliana GN=MAP1B PE=2 SV=2//4.93081e-135	0.974638	7.92058e-08
PRL	ZM005894-0463	31060531	Zm00001d049365	4	Zm00001d049365	LNC_004974	XLOC_049751	lncRNA	Zm00001d049365_T001	Zm00001d049365	sp|Q9FV52|MAP1B_ARATH Methionine aminopeptidase 1B, chloroplastic OS=Arabidopsis thaliana GN=MAP1B PE=2 SV=2//4.93081e-135	-0.957347	1.03485e-06
PRL	ZM005894-0463	31060531	Zm00001d049365	4	Zm00001d049365	LNC_002808	XLOC_027974	lncRNA	Zm00001d049365_T001	Zm00001d049365	sp|Q9FV52|MAP1B_ARATH Methionine aminopeptidase 1B, chloroplastic OS=Arabidopsis thaliana GN=MAP1B PE=2 SV=2//4.93081e-135	0.973415	1.00028e-07
PRL	ZM005894-0463	31060531	Zm00001d049365	4	Zm00001d049365	LNC_006053	XLOC_060181	lncRNA	Zm00001d049365_T001	Zm00001d049365	sp|Q9FV52|MAP1B_ARATH Methionine aminopeptidase 1B, chloroplastic OS=Arabidopsis thaliana GN=MAP1B PE=2 SV=2//4.93081e-135	0.982758	1.16589e-08
PRL	ZM005894-0463	31060531	Zm00001d049365	4	Zm00001d049365	LNC_006055	XLOC_060181	lncRNA	Zm00001d049365_T001	Zm00001d049365	sp|Q9FV52|MAP1B_ARATH Methionine aminopeptidase 1B, chloroplastic OS=Arabidopsis thaliana GN=MAP1B PE=2 SV=2//4.93081e-135	0.955508	1.27404e-06
PRL	ZM005894-0463	31060531	Zm00001d049365	4	Zm00001d049365	LNC_005116	XLOC_051277	lncRNA	Zm00001d049365_T001	Zm00001d049365	sp|Q9FV52|MAP1B_ARATH Methionine aminopeptidase 1B, chloroplastic OS=Arabidopsis thaliana GN=MAP1B PE=2 SV=2//4.93081e-135	0.964192	4.36547e-07
PRL	ZM005894-0463	31060531	Zm00001d049365	4	Zm00001d049365	LNC_003804	XLOC_038593	lncRNA	Zm00001d049365_T001	Zm00001d049365	sp|Q9FV52|MAP1B_ARATH Methionine aminopeptidase 1B, chloroplastic OS=Arabidopsis thaliana GN=MAP1B PE=2 SV=2//4.93081e-135	0.973537	9.77691e-08
PRL	ZM005894-0463	31060531	Zm00001d049365	4	Zm00001d049365	LNC_004418	XLOC_044310	lncRNA	Zm00001d049365_T001	Zm00001d049365	sp|Q9FV52|MAP1B_ARATH Methionine aminopeptidase 1B, chloroplastic OS=Arabidopsis thaliana GN=MAP1B PE=2 SV=2//4.93081e-135	0.995322	1.75111e-11
PRL	ZM005894-0463	31060531	Zm00001d049365	4	Zm00001d049365	LNC_006179	XLOC_061596	lncRNA	Zm00001d049365_T001	Zm00001d049365	sp|Q9FV52|MAP1B_ARATH Methionine aminopeptidase 1B, chloroplastic OS=Arabidopsis thaliana GN=MAP1B PE=2 SV=2//4.93081e-135	0.9637	4.67026e-07
PRL	ZM005894-0463	31060531	Zm00001d049365	4	Zm00001d049365	LNC_006129	XLOC_060879	lncRNA	Zm00001d049365_T001	Zm00001d049365	sp|Q9FV52|MAP1B_ARATH Methionine aminopeptidase 1B, chloroplastic OS=Arabidopsis thaliana GN=MAP1B PE=2 SV=2//4.93081e-135	0.950972	2.05417e-06
PRL	ZM005894-0463	31060531	Zm00001d049365	4	Zm00001d049365	LNC_003697	XLOC_037314	lncRNA	Zm00001d049365_T001	Zm00001d049365	sp|Q9FV52|MAP1B_ARATH Methionine aminopeptidase 1B, chloroplastic OS=Arabidopsis thaliana GN=MAP1B PE=2 SV=2//4.93081e-135	0.970331	1.72245e-07
PRL	ZM005894-0463	31060531	Zm00001d049365	4	Zm00001d049365	LNC_000316	XLOC_003315	lncRNA	Zm00001d049365_T001	Zm00001d049365	sp|Q9FV52|MAP1B_ARATH Methionine aminopeptidase 1B, chloroplastic OS=Arabidopsis thaliana GN=MAP1B PE=2 SV=2//4.93081e-135	0.969289	2.04357e-07
PRL	ZM005894-0463	31060531	Zm00001d049365	4	Zm00001d049365	LNC_005354	XLOC_054003	lncRNA	Zm00001d049365_T001	Zm00001d049365	sp|Q9FV52|MAP1B_ARATH Methionine aminopeptidase 1B, chloroplastic OS=Arabidopsis thaliana GN=MAP1B PE=2 SV=2//4.93081e-135	0.975456	6.73212e-08
PRL	ZM005894-0463	31060531	Zm00001d049365	4	Zm00001d049365	LNC_004770	XLOC_047656	lncRNA	Zm00001d049365_T001	Zm00001d049365	sp|Q9FV52|MAP1B_ARATH Methionine aminopeptidase 1B, chloroplastic OS=Arabidopsis thaliana GN=MAP1B PE=2 SV=2//4.93081e-135	0.9501	2.24027e-06
PRL	ZM005894-0463	31060531	Zm00001d049365	4	Zm00001d049365	LNC_004771	XLOC_047686	lncRNA	Zm00001d049365_T001	Zm00001d049365	sp|Q9FV52|MAP1B_ARATH Methionine aminopeptidase 1B, chloroplastic OS=Arabidopsis thaliana GN=MAP1B PE=2 SV=2//4.93081e-135	0.969101	2.10606e-07
PRL	ZM005894-0463	31060531	Zm00001d049365	4	Zm00001d049365	LNC_004088	XLOC_041394	lncRNA	Zm00001d049365_T001	Zm00001d049365	sp|Q9FV52|MAP1B_ARATH Methionine aminopeptidase 1B, chloroplastic OS=Arabidopsis thaliana GN=MAP1B PE=2 SV=2//4.93081e-135	0.950144	2.23044e-06
PRL	ZM005894-0463	31060531	Zm00001d049365	4	Zm00001d049365	LNC_004424	XLOC_044382	lncRNA	Zm00001d049365_T001	Zm00001d049365	sp|Q9FV52|MAP1B_ARATH Methionine aminopeptidase 1B, chloroplastic OS=Arabidopsis thaliana GN=MAP1B PE=2 SV=2//4.93081e-135	0.957631	1.00134e-06
PRL	ZM005894-0463	31060531	Zm00001d049365	4	Zm00001d049365	LNC_004422	XLOC_044382	lncRNA	Zm00001d049365_T001	Zm00001d049365	sp|Q9FV52|MAP1B_ARATH Methionine aminopeptidase 1B, chloroplastic OS=Arabidopsis thaliana GN=MAP1B PE=2 SV=2//4.93081e-135	0.983429	9.5704e-09
PRL	ZM005894-0463	31060531	Zm00001d049365	4	Zm00001d049365	LNC_004423	XLOC_044382	lncRNA	Zm00001d049365_T001	Zm00001d049365	sp|Q9FV52|MAP1B_ARATH Methionine aminopeptidase 1B, chloroplastic OS=Arabidopsis thaliana GN=MAP1B PE=2 SV=2//4.93081e-135	0.992098	2.39389e-10
PRL	ZM005894-0463	31060531	Zm00001d049365	4	Zm00001d049365	LNC_000678	XLOC_007084	lncRNA	Zm00001d049365_T001	Zm00001d049365	sp|Q9FV52|MAP1B_ARATH Methionine aminopeptidase 1B, chloroplastic OS=Arabidopsis thaliana GN=MAP1B PE=2 SV=2//4.93081e-135	0.981078	1.85081e-08
PRL	ZM005894-0463	31060531	Zm00001d049365	4	Zm00001d049365	LNC_000243	XLOC_002396	lncRNA	Zm00001d049365_T001	Zm00001d049365	sp|Q9FV52|MAP1B_ARATH Methionine aminopeptidase 1B, chloroplastic OS=Arabidopsis thaliana GN=MAP1B PE=2 SV=2//4.93081e-135	0.99309	1.22644e-10
PRL	ZM005894-0463	31060531	Zm00001d049365	4	Zm00001d049365	LNC_002863	XLOC_028531	lncRNA	Zm00001d049365_T001	Zm00001d049365	sp|Q9FV52|MAP1B_ARATH Methionine aminopeptidase 1B, chloroplastic OS=Arabidopsis thaliana GN=MAP1B PE=2 SV=2//4.93081e-135	0.970614	1.64283e-07
PRL	ZM005894-0463	31060531	Zm00001d049365	4	Zm00001d049365	LNC_001685	XLOC_016363	lncRNA	Zm00001d049365_T001	Zm00001d049365	sp|Q9FV52|MAP1B_ARATH Methionine aminopeptidase 1B, chloroplastic OS=Arabidopsis thaliana GN=MAP1B PE=2 SV=2//4.93081e-135	0.951999	1.85117e-06
PRL	ZM005894-0463	31060531	Zm00001d049365	4	Zm00001d049365	LNC_001681	XLOC_016321	lncRNA	Zm00001d049365_T001	Zm00001d049365	sp|Q9FV52|MAP1B_ARATH Methionine aminopeptidase 1B, chloroplastic OS=Arabidopsis thaliana GN=MAP1B PE=2 SV=2//4.93081e-135	0.97212	1.266e-07
PRL	ZM005894-0463	31060531	Zm00001d049365	4	Zm00001d049365	LNC_002314	XLOC_022906	lncRNA	Zm00001d049365_T001	Zm00001d049365	sp|Q9FV52|MAP1B_ARATH Methionine aminopeptidase 1B, chloroplastic OS=Arabidopsis thaliana GN=MAP1B PE=2 SV=2//4.93081e-135	0.971718	1.35895e-07
PRL	ZM005894-0463	31060531	Zm00001d049365	4	Zm00001d049365	LNC_000797	XLOC_008145	lncRNA	Zm00001d049365_T001	Zm00001d049365	sp|Q9FV52|MAP1B_ARATH Methionine aminopeptidase 1B, chloroplastic OS=Arabidopsis thaliana GN=MAP1B PE=2 SV=2//4.93081e-135	0.963515	4.7885e-07
PRL	ZM005894-0463	31060531	Zm00001d049365	4	Zm00001d049365	LNC_005149	XLOC_051653	lncRNA	Zm00001d049365_T001	Zm00001d049365	sp|Q9FV52|MAP1B_ARATH Methionine aminopeptidase 1B, chloroplastic OS=Arabidopsis thaliana GN=MAP1B PE=2 SV=2//4.93081e-135	0.951361	1.97535e-06
PRL	ZM005894-0463	31060531	Zm00001d049365	4	Zm00001d049365	LNC_004941	XLOC_049547	lncRNA	Zm00001d049365_T001	Zm00001d049365	sp|Q9FV52|MAP1B_ARATH Methionine aminopeptidase 1B, chloroplastic OS=Arabidopsis thaliana GN=MAP1B PE=2 SV=2//4.93081e-135	0.962176	5.72182e-07
PRL	ZM005894-0463	31060531	Zm00001d049365	4	Zm00001d049365	LNC_000183	XLOC_001989	lncRNA	Zm00001d049365_T001	Zm00001d049365	sp|Q9FV52|MAP1B_ARATH Methionine aminopeptidase 1B, chloroplastic OS=Arabidopsis thaliana GN=MAP1B PE=2 SV=2//4.93081e-135	0.977615	4.2639e-08
PRL	ZM005894-0463	31060531	Zm00001d049365	4	Zm00001d049365	LNC_003832	XLOC_039066	lncRNA	Zm00001d049365_T001	Zm00001d049365	sp|Q9FV52|MAP1B_ARATH Methionine aminopeptidase 1B, chloroplastic OS=Arabidopsis thaliana GN=MAP1B PE=2 SV=2//4.93081e-135	0.970874	1.57201e-07
PRL	ZM005894-0463	31060531	Zm00001d049365	4	Zm00001d049365	LNC_001873	XLOC_018506	lncRNA	Zm00001d049365_T001	Zm00001d049365	sp|Q9FV52|MAP1B_ARATH Methionine aminopeptidase 1B, chloroplastic OS=Arabidopsis thaliana GN=MAP1B PE=2 SV=2//4.93081e-135	0.987903	1.99884e-09
PRL	ZM005894-0463	31060531	Zm00001d049365	4	Zm00001d049365	LNC_001305	XLOC_012983	lncRNA	Zm00001d049365_T001	Zm00001d049365	sp|Q9FV52|MAP1B_ARATH Methionine aminopeptidase 1B, chloroplastic OS=Arabidopsis thaliana GN=MAP1B PE=2 SV=2//4.93081e-135	0.96757	2.67544e-07
PRL	ZM005894-0463	31060531	Zm00001d049365	4	Zm00001d049365	LNC_001879	XLOC_018552	lncRNA	Zm00001d049365_T001	Zm00001d049365	sp|Q9FV52|MAP1B_ARATH Methionine aminopeptidase 1B, chloroplastic OS=Arabidopsis thaliana GN=MAP1B PE=2 SV=2//4.93081e-135	0.982278	1.33638e-08
PRL	ZM005894-0463	31060531	Zm00001d049365	4	Zm00001d049365	LNC_003227	XLOC_032047	lncRNA	Zm00001d049365_T001	Zm00001d049365	sp|Q9FV52|MAP1B_ARATH Methionine aminopeptidase 1B, chloroplastic OS=Arabidopsis thaliana GN=MAP1B PE=2 SV=2//4.93081e-135	0.950205	2.21706e-06
PRL	ZM005894-0463	31060531	Zm00001d049365	4	Zm00001d049365	LNC_001789	XLOC_017858	lncRNA	Zm00001d049365_T001	Zm00001d049365	sp|Q9FV52|MAP1B_ARATH Methionine aminopeptidase 1B, chloroplastic OS=Arabidopsis thaliana GN=MAP1B PE=2 SV=2//4.93081e-135	0.969916	1.84521e-07
PRL	ZM005894-0463	31060531	Zm00001d049365	4	Zm00001d049365	LNC_003009	XLOC_029786	lncRNA	Zm00001d049365_T001	Zm00001d049365	sp|Q9FV52|MAP1B_ARATH Methionine aminopeptidase 1B, chloroplastic OS=Arabidopsis thaliana GN=MAP1B PE=2 SV=2//4.93081e-135	0.974055	8.86476e-08
PRL	ZM005894-0463	31060531	Zm00001d049365	4	Zm00001d049365	LNC_004334	XLOC_043703	lncRNA	Zm00001d049365_T001	Zm00001d049365	sp|Q9FV52|MAP1B_ARATH Methionine aminopeptidase 1B, chloroplastic OS=Arabidopsis thaliana GN=MAP1B PE=2 SV=2//4.93081e-135	0.976425	5.51232e-08
PRL	ZM005894-0463	31060531	Zm00001d049365	4	Zm00001d049365	LNC_003499	XLOC_035158	lncRNA	Zm00001d049365_T001	Zm00001d049365	sp|Q9FV52|MAP1B_ARATH Methionine aminopeptidase 1B, chloroplastic OS=Arabidopsis thaliana GN=MAP1B PE=2 SV=2//4.93081e-135	0.976851	5.03563e-08
PRL	ZM005894-0463	31060531	Zm00001d049365	4	Zm00001d049365	LNC_002206	XLOC_021953	lncRNA	Zm00001d049365_T001	Zm00001d049365	sp|Q9FV52|MAP1B_ARATH Methionine aminopeptidase 1B, chloroplastic OS=Arabidopsis thaliana GN=MAP1B PE=2 SV=2//4.93081e-135	0.960819	6.80867e-07
PRL	ZM005894-0463	31060531	Zm00001d049365	4	Zm00001d049365	LNC_002476	XLOC_024740	lncRNA	Zm00001d049365_T001	Zm00001d049365	sp|Q9FV52|MAP1B_ARATH Methionine aminopeptidase 1B, chloroplastic OS=Arabidopsis thaliana GN=MAP1B PE=2 SV=2//4.93081e-135	0.990737	5.28661e-10
PRL	ZM005894-0463	31060531	Zm00001d049365	4	Zm00001d049365	LNC_002479	XLOC_024741	lncRNA	Zm00001d049365_T001	Zm00001d049365	sp|Q9FV52|MAP1B_ARATH Methionine aminopeptidase 1B, chloroplastic OS=Arabidopsis thaliana GN=MAP1B PE=2 SV=2//4.93081e-135	0.951095	2.02907e-06
PRL	ZM005894-0463	31060531	Zm00001d049365	4	Zm00001d049365	LNC_000680	XLOC_007100	lncRNA	Zm00001d049365_T001	Zm00001d049365	sp|Q9FV52|MAP1B_ARATH Methionine aminopeptidase 1B, chloroplastic OS=Arabidopsis thaliana GN=MAP1B PE=2 SV=2//4.93081e-135	0.978007	3.90558e-08
PRL	ZM005894-0463	31060531	Zm00001d049365	4	Zm00001d049365	LNC_004854	XLOC_048668	lncRNA	Zm00001d049365_T001	Zm00001d049365	sp|Q9FV52|MAP1B_ARATH Methionine aminopeptidase 1B, chloroplastic OS=Arabidopsis thaliana GN=MAP1B PE=2 SV=2//4.93081e-135	0.952001	1.85074e-06
PRL	ZM005894-0463	31060531	Zm00001d049365	4	Zm00001d049365	LNC_000350	XLOC_003713	lncRNA	Zm00001d049365_T001	Zm00001d049365	sp|Q9FV52|MAP1B_ARATH Methionine aminopeptidase 1B, chloroplastic OS=Arabidopsis thaliana GN=MAP1B PE=2 SV=2//4.93081e-135	0.959809	7.71925e-07
PRL	ZM005894-0463	31060531	Zm00001d049365	4	Zm00001d049365	LNC_004407	XLOC_044205	lncRNA	Zm00001d049365_T001	Zm00001d049365	sp|Q9FV52|MAP1B_ARATH Methionine aminopeptidase 1B, chloroplastic OS=Arabidopsis thaliana GN=MAP1B PE=2 SV=2//4.93081e-135	0.977128	4.74428e-08
PRL	ZM005894-0463	31060531	Zm00001d049365	4	Zm00001d049365	LNC_004686	XLOC_047020	lncRNA	Zm00001d049365_T001	Zm00001d049365	sp|Q9FV52|MAP1B_ARATH Methionine aminopeptidase 1B, chloroplastic OS=Arabidopsis thaliana GN=MAP1B PE=2 SV=2//4.93081e-135	0.959273	8.24007e-07
PRL	ZM005894-0463	31060531	Zm00001d049365	4	Zm00001d049365	LNC_000918	XLOC_009420	lncRNA	Zm00001d049365_T001	Zm00001d049365	sp|Q9FV52|MAP1B_ARATH Methionine aminopeptidase 1B, chloroplastic OS=Arabidopsis thaliana GN=MAP1B PE=2 SV=2//4.93081e-135	0.96558	3.59097e-07
PRL	ZM005894-0463	31060531	Zm00001d049365	4	Zm00001d049365	LNC_003247	XLOC_032160	lncRNA	Zm00001d049365_T001	Zm00001d049365	sp|Q9FV52|MAP1B_ARATH Methionine aminopeptidase 1B, chloroplastic OS=Arabidopsis thaliana GN=MAP1B PE=2 SV=2//4.93081e-135	0.970297	1.73218e-07
PRL	ZM005894-0463	31060531	Zm00001d049365	4	Zm00001d049365	LNC_003242	XLOC_032140	lncRNA	Zm00001d049365_T001	Zm00001d049365	sp|Q9FV52|MAP1B_ARATH Methionine aminopeptidase 1B, chloroplastic OS=Arabidopsis thaliana GN=MAP1B PE=2 SV=2//4.93081e-135	0.97784	4.05497e-08
PRL	ZM005894-0463	31060531	Zm00001d049365	4	Zm00001d049365	LNC_004594	XLOC_046268	lncRNA	Zm00001d049365_T001	Zm00001d049365	sp|Q9FV52|MAP1B_ARATH Methionine aminopeptidase 1B, chloroplastic OS=Arabidopsis thaliana GN=MAP1B PE=2 SV=2//4.93081e-135	0.957718	9.91215e-07
PRL	ZM005894-0463	31060531	Zm00001d049365	4	Zm00001d049365	LNC_005622	XLOC_056183	lncRNA	Zm00001d049365_T001	Zm00001d049365	sp|Q9FV52|MAP1B_ARATH Methionine aminopeptidase 1B, chloroplastic OS=Arabidopsis thaliana GN=MAP1B PE=2 SV=2//4.93081e-135	0.957795	9.82401e-07
PRL	ZM005894-0463	31060531	Zm00001d049365	4	Zm00001d049365	LNC_001634	XLOC_015822	lncRNA	Zm00001d049365_T001	Zm00001d049365	sp|Q9FV52|MAP1B_ARATH Methionine aminopeptidase 1B, chloroplastic OS=Arabidopsis thaliana GN=MAP1B PE=2 SV=2//4.93081e-135	0.978604	3.40696e-08
PRL	ZM005894-0463	31060531	Zm00001d049365	4	Zm00001d049365	LNC_002996	XLOC_029641	lncRNA	Zm00001d049365_T001	Zm00001d049365	sp|Q9FV52|MAP1B_ARATH Methionine aminopeptidase 1B, chloroplastic OS=Arabidopsis thaliana GN=MAP1B PE=2 SV=2//4.93081e-135	0.951469	1.95381e-06
PRL	ZM005894-0463	31060531	Zm00001d049365	4	Zm00001d049365	LNC_000340	XLOC_003534	lncRNA	Zm00001d049365_T001	Zm00001d049365	sp|Q9FV52|MAP1B_ARATH Methionine aminopeptidase 1B, chloroplastic OS=Arabidopsis thaliana GN=MAP1B PE=2 SV=2//4.93081e-135	0.959986	7.55264e-07
PRL	ZM005894-0463	31060531	Zm00001d049365	4	Zm00001d049365	LNC_002861	XLOC_028510	lncRNA	Zm00001d049365_T001	Zm00001d049365	sp|Q9FV52|MAP1B_ARATH Methionine aminopeptidase 1B, chloroplastic OS=Arabidopsis thaliana GN=MAP1B PE=2 SV=2//4.93081e-135	0.96138	6.34074e-07
PRL	ZM005894-0463	31060531	Zm00001d049365	4	Zm00001d049365	LNC_004691	XLOC_047050	lncRNA	Zm00001d049365_T001	Zm00001d049365	sp|Q9FV52|MAP1B_ARATH Methionine aminopeptidase 1B, chloroplastic OS=Arabidopsis thaliana GN=MAP1B PE=2 SV=2//4.93081e-135	0.961446	6.28776e-07
PRL	ZM005894-0463	31060531	Zm00001d049365	4	Zm00001d049365	LNC_003272	XLOC_032480	lncRNA	Zm00001d049365_T001	Zm00001d049365	sp|Q9FV52|MAP1B_ARATH Methionine aminopeptidase 1B, chloroplastic OS=Arabidopsis thaliana GN=MAP1B PE=2 SV=2//4.93081e-135	0.961712	6.07645e-07
PRL	ZM005894-0463	31060531	Zm00001d049365	4	Zm00001d049365	LNC_000597	XLOC_006448	lncRNA	Zm00001d049365_T001	Zm00001d049365	sp|Q9FV52|MAP1B_ARATH Methionine aminopeptidase 1B, chloroplastic OS=Arabidopsis thaliana GN=MAP1B PE=2 SV=2//4.93081e-135	0.962413	5.54661e-07
PRL	ZM005894-0463	31060531	Zm00001d049365	4	Zm00001d049365	LNC_002538	XLOC_025256	lncRNA	Zm00001d049365_T001	Zm00001d049365	sp|Q9FV52|MAP1B_ARATH Methionine aminopeptidase 1B, chloroplastic OS=Arabidopsis thaliana GN=MAP1B PE=2 SV=2//4.93081e-135	0.964853	3.98154e-07
PRL	ZM005894-0463	31060531	Zm00001d049365	4	Zm00001d049365	LNC_002568	XLOC_025427	lncRNA	Zm00001d049365_T001	Zm00001d049365	sp|Q9FV52|MAP1B_ARATH Methionine aminopeptidase 1B, chloroplastic OS=Arabidopsis thaliana GN=MAP1B PE=2 SV=2//4.93081e-135	0.985021	5.79156e-09
PRL	ZM005894-0463	31060531	Zm00001d049365	4	Zm00001d049365	LNC_004900	XLOC_049207	lncRNA	Zm00001d049365_T001	Zm00001d049365	sp|Q9FV52|MAP1B_ARATH Methionine aminopeptidase 1B, chloroplastic OS=Arabidopsis thaliana GN=MAP1B PE=2 SV=2//4.93081e-135	0.957678	9.95808e-07
PRL	ZM005894-0463	31060531	Zm00001d049365	4	Zm00001d049365	LNC_003879	XLOC_039392	lncRNA	Zm00001d049365_T001	Zm00001d049365	sp|Q9FV52|MAP1B_ARATH Methionine aminopeptidase 1B, chloroplastic OS=Arabidopsis thaliana GN=MAP1B PE=2 SV=2//4.93081e-135	0.955136	1.3273e-06
PRL	ZM005894-0463	31060531	Zm00001d049365	4	Zm00001d049365	LNC_004877	XLOC_048968	lncRNA	Zm00001d049365_T001	Zm00001d049365	sp|Q9FV52|MAP1B_ARATH Methionine aminopeptidase 1B, chloroplastic OS=Arabidopsis thaliana GN=MAP1B PE=2 SV=2//4.93081e-135	0.956502	1.13986e-06
PRL	ZM005894-0463	31060531	Zm00001d049365	4	Zm00001d049365	LNC_000575	XLOC_006280	lncRNA	Zm00001d049365_T001	Zm00001d049365	sp|Q9FV52|MAP1B_ARATH Methionine aminopeptidase 1B, chloroplastic OS=Arabidopsis thaliana GN=MAP1B PE=2 SV=2//4.93081e-135	0.970466	1.6842e-07
CRN/Crossings	PZE-104016717/SYN30707	16500659/17414413	Zm00001d049158	4	Zm00001d049158	LNC_003046	XLOC_030328	lncRNA	Zm00001d049158_T001	Zm00001d049158	sp|Q9LK48|BH077_ARATH Transcription factor bHLH77 OS=Arabidopsis thaliana GN=BHLH77 PE=1 SV=1//5.17425e-47	0.953136	1.64524e-06
CRN/Crossings	PZE-104016717/SYN30707	16500659/17414413	Zm00001d049158	4	Zm00001d049158	LNC_001763	XLOC_017581	lncRNA	Zm00001d049158_T001	Zm00001d049158	sp|Q9LK48|BH077_ARATH Transcription factor bHLH77 OS=Arabidopsis thaliana GN=BHLH77 PE=1 SV=1//5.17425e-47	0.983886	8.32945e-09
CRN/Crossings	PZE-104016717/SYN30707	16500659/17414413	Zm00001d049158	4	Zm00001d049158	LNC_001229	XLOC_012165	lncRNA	Zm00001d049158_T001	Zm00001d049158	sp|Q9LK48|BH077_ARATH Transcription factor bHLH77 OS=Arabidopsis thaliana GN=BHLH77 PE=1 SV=1//5.17425e-47	0.969302	2.0393e-07
CRN/Crossings	PZE-104016717/SYN30707	16500659/17414413	Zm00001d049158	4	Zm00001d049158	LNC_004499	XLOC_045008	lncRNA	Zm00001d049158_T001	Zm00001d049158	sp|Q9LK48|BH077_ARATH Transcription factor bHLH77 OS=Arabidopsis thaliana GN=BHLH77 PE=1 SV=1//5.17425e-47	0.952015	1.84811e-06
CRN/Crossings	PZE-104016717/SYN30707	16500659/17414413	Zm00001d049158	4	Zm00001d049158	LNC_005514	XLOC_055185	lncRNA	Zm00001d049158_T001	Zm00001d049158	sp|Q9LK48|BH077_ARATH Transcription factor bHLH77 OS=Arabidopsis thaliana GN=BHLH77 PE=1 SV=1//5.17425e-47	0.970905	1.56377e-07
CRN/Crossings	PZE-104016717/SYN30707	16500659/17414413	Zm00001d049158	4	Zm00001d049158	LNC_000948	XLOC_009702	lncRNA	Zm00001d049158_T001	Zm00001d049158	sp|Q9LK48|BH077_ARATH Transcription factor bHLH77 OS=Arabidopsis thaliana GN=BHLH77 PE=1 SV=1//5.17425e-47	0.959354	8.16044e-07
CRN/Crossings	PZE-104016717/SYN30707	16500659/17414413	Zm00001d049158	4	Zm00001d049158	LNC_003548	XLOC_035747	lncRNA	Zm00001d049158_T001	Zm00001d049158	sp|Q9LK48|BH077_ARATH Transcription factor bHLH77 OS=Arabidopsis thaliana GN=BHLH77 PE=1 SV=1//5.17425e-47	0.959548	7.96997e-07
CRN/Crossings	PZE-104016717/SYN30707	16500659/17414413	Zm00001d049158	4	Zm00001d049158	LNC_003098	XLOC_030855	lncRNA	Zm00001d049158_T001	Zm00001d049158	sp|Q9LK48|BH077_ARATH Transcription factor bHLH77 OS=Arabidopsis thaliana GN=BHLH77 PE=1 SV=1//5.17425e-47	0.955188	1.31984e-06
CRN/Crossings	PZE-104016717/SYN30707	16500659/17414413	Zm00001d049158	4	Zm00001d049158	LNC_002050	XLOC_020176	lncRNA	Zm00001d049158_T001	Zm00001d049158	sp|Q9LK48|BH077_ARATH Transcription factor bHLH77 OS=Arabidopsis thaliana GN=BHLH77 PE=1 SV=1//5.17425e-47	0.968296	2.39186e-07
CRN/Crossings	PZE-104016717/SYN30707	16500659/17414413	Zm00001d049158	4	Zm00001d049158	LNC_002709	XLOC_026884	lncRNA	Zm00001d049158_T001	Zm00001d049158	sp|Q9LK48|BH077_ARATH Transcription factor bHLH77 OS=Arabidopsis thaliana GN=BHLH77 PE=1 SV=1//5.17425e-47	0.976422	5.5159e-08
CRN/Crossings	PZE-104016717/SYN30707	16500659/17414413	Zm00001d049158	4	Zm00001d049158	LNC_005707	XLOC_057253	lncRNA	Zm00001d049158_T001	Zm00001d049158	sp|Q9LK48|BH077_ARATH Transcription factor bHLH77 OS=Arabidopsis thaliana GN=BHLH77 PE=1 SV=1//5.17425e-47	0.988268	1.7163e-09
CRN/Crossings	PZE-104016717/SYN30707	16500659/17414413	Zm00001d049158	4	Zm00001d049158	LNC_005390	XLOC_054315	lncRNA	Zm00001d049158_T001	Zm00001d049158	sp|Q9LK48|BH077_ARATH Transcription factor bHLH77 OS=Arabidopsis thaliana GN=BHLH77 PE=1 SV=1//5.17425e-47	0.98712	2.73214e-09
CRN/Crossings	PZE-104016717/SYN30707	16500659/17414413	Zm00001d049158	4	Zm00001d049158	LNC_000852	XLOC_008782	lncRNA	Zm00001d049158_T001	Zm00001d049158	sp|Q9LK48|BH077_ARATH Transcription factor bHLH77 OS=Arabidopsis thaliana GN=BHLH77 PE=1 SV=1//5.17425e-47	0.976909	4.97343e-08
CRN/Crossings	PZE-104016717/SYN30707	16500659/17414413	Zm00001d049158	4	Zm00001d049158	LNC_003032	XLOC_030131	lncRNA	Zm00001d049158_T001	Zm00001d049158	sp|Q9LK48|BH077_ARATH Transcription factor bHLH77 OS=Arabidopsis thaliana GN=BHLH77 PE=1 SV=1//5.17425e-47	0.962978	5.14741e-07
CRN/Crossings	PZE-104016717/SYN30707	16500659/17414413	Zm00001d049158	4	Zm00001d049158	LNC_001737	XLOC_017125	lncRNA	Zm00001d049158_T001	Zm00001d049158	sp|Q9LK48|BH077_ARATH Transcription factor bHLH77 OS=Arabidopsis thaliana GN=BHLH77 PE=1 SV=1//5.17425e-47	0.953864	1.52321e-06
CRN/Crossings	PZE-104016717/SYN30707	16500659/17414413	Zm00001d049158	4	Zm00001d049158	LNC_003965	XLOC_040264	lncRNA	Zm00001d049158_T001	Zm00001d049158	sp|Q9LK48|BH077_ARATH Transcription factor bHLH77 OS=Arabidopsis thaliana GN=BHLH77 PE=1 SV=1//5.17425e-47	0.956595	1.12792e-06
CRN/Crossings	PZE-104016717/SYN30707	16500659/17414413	Zm00001d049158	4	Zm00001d049158	LNC_005757	XLOC_057620	lncRNA	Zm00001d049158_T001	Zm00001d049158	sp|Q9LK48|BH077_ARATH Transcription factor bHLH77 OS=Arabidopsis thaliana GN=BHLH77 PE=1 SV=1//5.17425e-47	0.958549	8.98881e-07
CRN/Crossings	PZE-104016717/SYN30707	16500659/17414413	Zm00001d049158	4	Zm00001d049158	LNC_001059	XLOC_010660	lncRNA	Zm00001d049158_T001	Zm00001d049158	sp|Q9LK48|BH077_ARATH Transcription factor bHLH77 OS=Arabidopsis thaliana GN=BHLH77 PE=1 SV=1//5.17425e-47	0.959983	7.55604e-07
CRN/Crossings	PZE-104016717/SYN30707	16500659/17414413	Zm00001d049158	4	Zm00001d049158	LNC_001917	XLOC_018786	lncRNA	Zm00001d049158_T001	Zm00001d049158	sp|Q9LK48|BH077_ARATH Transcription factor bHLH77 OS=Arabidopsis thaliana GN=BHLH77 PE=1 SV=1//5.17425e-47	0.974408	8.28199e-08
CRN/Crossings	PZE-104016717/SYN30707	16500659/17414413	Zm00001d049158	4	Zm00001d049158	LNC_005057	XLOC_050695	lncRNA	Zm00001d049158_T001	Zm00001d049158	sp|Q9LK48|BH077_ARATH Transcription factor bHLH77 OS=Arabidopsis thaliana GN=BHLH77 PE=1 SV=1//5.17425e-47	0.966853	2.98064e-07
CRN/Crossings	PZE-104016717/SYN30707	16500659/17414413	Zm00001d049158	4	Zm00001d049158	LNC_004965	XLOC_049703	lncRNA	Zm00001d049158_T001	Zm00001d049158	sp|Q9LK48|BH077_ARATH Transcription factor bHLH77 OS=Arabidopsis thaliana GN=BHLH77 PE=1 SV=1//5.17425e-47	0.953131	1.64602e-06
CRN/Crossings	PZE-104016717/SYN30707	16500659/17414413	Zm00001d049158	4	Zm00001d049158	LNC_001278	XLOC_012647	lncRNA	Zm00001d049158_T001	Zm00001d049158	sp|Q9LK48|BH077_ARATH Transcription factor bHLH77 OS=Arabidopsis thaliana GN=BHLH77 PE=1 SV=1//5.17425e-47	0.960489	7.09641e-07
CRN/Crossings	PZE-104016717/SYN30707	16500659/17414413	Zm00001d049158	4	Zm00001d049158	LNC_004302	XLOC_043491	lncRNA	Zm00001d049158_T001	Zm00001d049158	sp|Q9LK48|BH077_ARATH Transcription factor bHLH77 OS=Arabidopsis thaliana GN=BHLH77 PE=1 SV=1//5.17425e-47	0.956835	1.09752e-06
CRN/Crossings	PZE-104016717/SYN30707	16500659/17414413	Zm00001d049158	4	Zm00001d049158	LNC_003317	XLOC_032977	lncRNA	Zm00001d049158_T001	Zm00001d049158	sp|Q9LK48|BH077_ARATH Transcription factor bHLH77 OS=Arabidopsis thaliana GN=BHLH77 PE=1 SV=1//5.17425e-47	0.9541	1.48532e-06
CRN/Crossings	PZE-104016717/SYN30707	16500659/17414413	Zm00001d049158	4	Zm00001d049158	LNC_001646	XLOC_015970	lncRNA	Zm00001d049158_T001	Zm00001d049158	sp|Q9LK48|BH077_ARATH Transcription factor bHLH77 OS=Arabidopsis thaliana GN=BHLH77 PE=1 SV=1//5.17425e-47	0.97813	3.79862e-08
CRN/Crossings	PZE-104016717/SYN30707	16500659/17414413	Zm00001d049158	4	Zm00001d049158	LNC_004592	XLOC_046251	lncRNA	Zm00001d049158_T001	Zm00001d049158	sp|Q9LK48|BH077_ARATH Transcription factor bHLH77 OS=Arabidopsis thaliana GN=BHLH77 PE=1 SV=1//5.17425e-47	0.980111	2.3709e-08
CRN/Crossings	PZE-104016717/SYN30707	16500659/17414413	Zm00001d049158	4	Zm00001d049158	LNC_005629	XLOC_056264	lncRNA	Zm00001d049158_T001	Zm00001d049158	sp|Q9LK48|BH077_ARATH Transcription factor bHLH77 OS=Arabidopsis thaliana GN=BHLH77 PE=1 SV=1//5.17425e-47	0.961898	5.93189e-07
CRN/Crossings	PZE-104016717/SYN30707	16500659/17414413	Zm00001d049158	4	Zm00001d049158	LNC_004668	XLOC_046837	lncRNA	Zm00001d049158_T001	Zm00001d049158	sp|Q9LK48|BH077_ARATH Transcription factor bHLH77 OS=Arabidopsis thaliana GN=BHLH77 PE=1 SV=1//5.17425e-47	0.993214	1.1202e-10
CRN/Crossings	PZE-104016717/SYN30707	16500659/17414413	Zm00001d049158	4	Zm00001d049158	LNC_002994	XLOC_029618	lncRNA	Zm00001d049158_T001	Zm00001d049158	sp|Q9LK48|BH077_ARATH Transcription factor bHLH77 OS=Arabidopsis thaliana GN=BHLH77 PE=1 SV=1//5.17425e-47	0.968443	2.33753e-07
CRN/Crossings	PZE-104016717/SYN30707	16500659/17414413	Zm00001d049158	4	Zm00001d049158	LNC_005320	XLOC_053365	lncRNA	Zm00001d049158_T001	Zm00001d049158	sp|Q9LK48|BH077_ARATH Transcription factor bHLH77 OS=Arabidopsis thaliana GN=BHLH77 PE=1 SV=1//5.17425e-47	0.968476	2.32542e-07
CRN/Crossings	PZE-104016717/SYN30707	16500659/17414413	Zm00001d049158	4	Zm00001d049158	LNC_001948	XLOC_019093	lncRNA	Zm00001d049158_T001	Zm00001d049158	sp|Q9LK48|BH077_ARATH Transcription factor bHLH77 OS=Arabidopsis thaliana GN=BHLH77 PE=1 SV=1//5.17425e-47	0.962648	5.37781e-07
CRN/Crossings	PZE-104016717/SYN30707	16500659/17414413	Zm00001d049158	4	Zm00001d049158	LNC_000803	XLOC_008198	lncRNA	Zm00001d049158_T001	Zm00001d049158	sp|Q9LK48|BH077_ARATH Transcription factor bHLH77 OS=Arabidopsis thaliana GN=BHLH77 PE=1 SV=1//5.17425e-47	0.972925	1.09492e-07
Forks	PZE-104010552	7929588	Zm00001d048925	4	Zm00001d048925	LNC_003472	XLOC_034922	lncRNA	Zm00001d048925_T001	Zm00001d048925	sp|Q9AR73|HQGT_RAUSE Hydroquinone glucosyltransferase OS=Rauvolfia serpentina GN=AS PE=1 SV=1//1.52269e-128	0.953866	1.52295e-06
Forks	PZE-104010552	7929588	Zm00001d048866	4	Zm00001d048866	LNC_004651	XLOC_046656	lncRNA	Zm00001d048866_T001	Zm00001d048866	sp|Q8GT20|BEBT_TOBAC Benzyl alcohol O-benzoyltransferase OS=Nicotiana tabacum GN=HSR201 PE=1 SV=1//1.86992e-150	0.953169	1.63952e-06
Forks	PZE-104010552	7929588	Zm00001d048866	4	Zm00001d048866	LNC_000195	XLOC_002035	lncRNA	Zm00001d048866_T001	Zm00001d048866	sp|Q8GT20|BEBT_TOBAC Benzyl alcohol O-benzoyltransferase OS=Nicotiana tabacum GN=HSR201 PE=1 SV=1//1.86992e-150	0.962025	5.83486e-07
Forks	PZE-104010552	7929588	Zm00001d048866	4	Zm00001d048866	LNC_003848	XLOC_039216	lncRNA	Zm00001d048866_T001	Zm00001d048866	sp|Q8GT20|BEBT_TOBAC Benzyl alcohol O-benzoyltransferase OS=Nicotiana tabacum GN=HSR201 PE=1 SV=1//1.86992e-150	0.959928	7.60742e-07
Forks	PZE-104010552	7929588	Zm00001d048866	4	Zm00001d048866	LNC_001525	XLOC_014936	lncRNA	Zm00001d048866_T001	Zm00001d048866	sp|Q8GT20|BEBT_TOBAC Benzyl alcohol O-benzoyltransferase OS=Nicotiana tabacum GN=HSR201 PE=1 SV=1//1.86992e-150	0.985868	4.3359e-09
Forks	PZE-104010552	7929588	Zm00001d048843	4	Zm00001d048843	LNC_003047	XLOC_030328	lncRNA	Zm00001d048843_T001	Zm00001d048843	sp|Q8L765|BPM1_ARATH BTB/POZ and MATH domain-containing protein 1 OS=Arabidopsis thaliana GN=BPM1 PE=1 SV=1//8.44969e-45	0.954696	1.39268e-06
Forks	PZE-104010552	7929588	Zm00001d048843	4	Zm00001d048843	LNC_003046	XLOC_030328	lncRNA	Zm00001d048843_T001	Zm00001d048843	sp|Q8L765|BPM1_ARATH BTB/POZ and MATH domain-containing protein 1 OS=Arabidopsis thaliana GN=BPM1 PE=1 SV=1//8.44969e-45	0.987428	2.42182e-09
Forks	PZE-104010552	7929588	Zm00001d048843	4	Zm00001d048843	LNC_001769	XLOC_017642	lncRNA	Zm00001d048843_T001	Zm00001d048843	sp|Q8L765|BPM1_ARATH BTB/POZ and MATH domain-containing protein 1 OS=Arabidopsis thaliana GN=BPM1 PE=1 SV=1//8.44969e-45	0.968899	2.17509e-07
Forks	PZE-104010552	7929588	Zm00001d048843	4	Zm00001d048843	LNC_001229	XLOC_012165	lncRNA	Zm00001d048843_T001	Zm00001d048843	sp|Q8L765|BPM1_ARATH BTB/POZ and MATH domain-containing protein 1 OS=Arabidopsis thaliana GN=BPM1 PE=1 SV=1//8.44969e-45	0.954061	1.49145e-06
Forks	PZE-104010552	7929588	Zm00001d048843	4	Zm00001d048843	LNC_000260	XLOC_002619	lncRNA	Zm00001d048843_T001	Zm00001d048843	sp|Q8L765|BPM1_ARATH BTB/POZ and MATH domain-containing protein 1 OS=Arabidopsis thaliana GN=BPM1 PE=1 SV=1//8.44969e-45	0.965157	3.81454e-07
Forks	PZE-104010552	7929588	Zm00001d048843	4	Zm00001d048843	LNC_004921	XLOC_049406	lncRNA	Zm00001d048843_T001	Zm00001d048843	sp|Q8L765|BPM1_ARATH BTB/POZ and MATH domain-containing protein 1 OS=Arabidopsis thaliana GN=BPM1 PE=1 SV=1//8.44969e-45	0.9555	1.27516e-06
Forks	PZE-104010552	7929588	Zm00001d048843	4	Zm00001d048843	LNC_003738	XLOC_037992	lncRNA	Zm00001d048843_T001	Zm00001d048843	sp|Q8L765|BPM1_ARATH BTB/POZ and MATH domain-containing protein 1 OS=Arabidopsis thaliana GN=BPM1 PE=1 SV=1//8.44969e-45	0.970886	1.5689e-07
Forks	PZE-104010552	7929588	Zm00001d048843	4	Zm00001d048843	LNC_005514	XLOC_055185	lncRNA	Zm00001d048843_T001	Zm00001d048843	sp|Q8L765|BPM1_ARATH BTB/POZ and MATH domain-containing protein 1 OS=Arabidopsis thaliana GN=BPM1 PE=1 SV=1//8.44969e-45	0.957625	1.00208e-06
Forks	PZE-104010552	7929588	Zm00001d048843	4	Zm00001d048843	LNC_001941	XLOC_019052	lncRNA	Zm00001d048843_T001	Zm00001d048843	sp|Q8L765|BPM1_ARATH BTB/POZ and MATH domain-containing protein 1 OS=Arabidopsis thaliana GN=BPM1 PE=1 SV=1//8.44969e-45	0.953257	1.62447e-06
Forks	PZE-104010552	7929588	Zm00001d048843	4	Zm00001d048843	LNC_002407	XLOC_023842	lncRNA	Zm00001d048843_T001	Zm00001d048843	sp|Q8L765|BPM1_ARATH BTB/POZ and MATH domain-containing protein 1 OS=Arabidopsis thaliana GN=BPM1 PE=1 SV=1//8.44969e-45	0.952764	1.71046e-06
Forks	PZE-104010552	7929588	Zm00001d048843	4	Zm00001d048843	LNC_003933	XLOC_039977	lncRNA	Zm00001d048843_T001	Zm00001d048843	sp|Q8L765|BPM1_ARATH BTB/POZ and MATH domain-containing protein 1 OS=Arabidopsis thaliana GN=BPM1 PE=1 SV=1//8.44969e-45	0.955429	1.28527e-06
Forks	PZE-104010552	7929588	Zm00001d048843	4	Zm00001d048843	LNC_003932	XLOC_039976	lncRNA	Zm00001d048843_T001	Zm00001d048843	sp|Q8L765|BPM1_ARATH BTB/POZ and MATH domain-containing protein 1 OS=Arabidopsis thaliana GN=BPM1 PE=1 SV=1//8.44969e-45	0.977138	4.73339e-08
Forks	PZE-104010552	7929588	Zm00001d048843	4	Zm00001d048843	LNC_002050	XLOC_020176	lncRNA	Zm00001d048843_T001	Zm00001d048843	sp|Q8L765|BPM1_ARATH BTB/POZ and MATH domain-containing protein 1 OS=Arabidopsis thaliana GN=BPM1 PE=1 SV=1//8.44969e-45	0.95974	7.78448e-07
Forks	PZE-104010552	7929588	Zm00001d048843	4	Zm00001d048843	LNC_002700	XLOC_026718	lncRNA	Zm00001d048843_T001	Zm00001d048843	sp|Q8L765|BPM1_ARATH BTB/POZ and MATH domain-containing protein 1 OS=Arabidopsis thaliana GN=BPM1 PE=1 SV=1//8.44969e-45	0.956152	1.18581e-06
Forks	PZE-104010552	7929588	Zm00001d048843	4	Zm00001d048843	LNC_003947	XLOC_040121	lncRNA	Zm00001d048843_T001	Zm00001d048843	sp|Q8L765|BPM1_ARATH BTB/POZ and MATH domain-containing protein 1 OS=Arabidopsis thaliana GN=BPM1 PE=1 SV=1//8.44969e-45	0.984485	6.89843e-09
Forks	PZE-104010552	7929588	Zm00001d048843	4	Zm00001d048843	LNC_005707	XLOC_057253	lncRNA	Zm00001d048843_T001	Zm00001d048843	sp|Q8L765|BPM1_ARATH BTB/POZ and MATH domain-containing protein 1 OS=Arabidopsis thaliana GN=BPM1 PE=1 SV=1//8.44969e-45	0.986381	3.60624e-09
Forks	PZE-104010552	7929588	Zm00001d048843	4	Zm00001d048843	LNC_002960	XLOC_029188	lncRNA	Zm00001d048843_T001	Zm00001d048843	sp|Q8L765|BPM1_ARATH BTB/POZ and MATH domain-containing protein 1 OS=Arabidopsis thaliana GN=BPM1 PE=1 SV=1//8.44969e-45	0.978194	3.74316e-08
Forks	PZE-104010552	7929588	Zm00001d048843	4	Zm00001d048843	LNC_003032	XLOC_030131	lncRNA	Zm00001d048843_T001	Zm00001d048843	sp|Q8L765|BPM1_ARATH BTB/POZ and MATH domain-containing protein 1 OS=Arabidopsis thaliana GN=BPM1 PE=1 SV=1//8.44969e-45	0.96511	3.83991e-07
Forks	PZE-104010552	7929588	Zm00001d048843	4	Zm00001d048843	LNC_000196	XLOC_002051	lncRNA	Zm00001d048843_T001	Zm00001d048843	sp|Q8L765|BPM1_ARATH BTB/POZ and MATH domain-containing protein 1 OS=Arabidopsis thaliana GN=BPM1 PE=1 SV=1//8.44969e-45	0.992214	2.22416e-10
Forks	PZE-104010552	7929588	Zm00001d048843	4	Zm00001d048843	LNC_002596	XLOC_025589	lncRNA	Zm00001d048843_T001	Zm00001d048843	sp|Q8L765|BPM1_ARATH BTB/POZ and MATH domain-containing protein 1 OS=Arabidopsis thaliana GN=BPM1 PE=1 SV=1//8.44969e-45	0.969937	1.83873e-07
Forks	PZE-104010552	7929588	Zm00001d048843	4	Zm00001d048843	LNC_003961	XLOC_040240	lncRNA	Zm00001d048843_T001	Zm00001d048843	sp|Q8L765|BPM1_ARATH BTB/POZ and MATH domain-containing protein 1 OS=Arabidopsis thaliana GN=BPM1 PE=1 SV=1//8.44969e-45	0.971461	1.42117e-07
Forks	PZE-104010552	7929588	Zm00001d048843	4	Zm00001d048843	LNC_003965	XLOC_040264	lncRNA	Zm00001d048843_T001	Zm00001d048843	sp|Q8L765|BPM1_ARATH BTB/POZ and MATH domain-containing protein 1 OS=Arabidopsis thaliana GN=BPM1 PE=1 SV=1//8.44969e-45	0.951468	1.954e-06
Forks	PZE-104010552	7929588	Zm00001d048843	4	Zm00001d048843	LNC_005237	XLOC_052371	lncRNA	Zm00001d048843_T001	Zm00001d048843	sp|Q8L765|BPM1_ARATH BTB/POZ and MATH domain-containing protein 1 OS=Arabidopsis thaliana GN=BPM1 PE=1 SV=1//8.44969e-45	0.965435	3.66628e-07
Forks	PZE-104010552	7929588	Zm00001d048843	4	Zm00001d048843	LNC_006112	XLOC_060721	lncRNA	Zm00001d048843_T001	Zm00001d048843	sp|Q8L765|BPM1_ARATH BTB/POZ and MATH domain-containing protein 1 OS=Arabidopsis thaliana GN=BPM1 PE=1 SV=1//8.44969e-45	0.957282	1.04266e-06
Forks	PZE-104010552	7929588	Zm00001d048843	4	Zm00001d048843	LNC_001917	XLOC_018786	lncRNA	Zm00001d048843_T001	Zm00001d048843	sp|Q8L765|BPM1_ARATH BTB/POZ and MATH domain-containing protein 1 OS=Arabidopsis thaliana GN=BPM1 PE=1 SV=1//8.44969e-45	0.962963	5.15728e-07
Forks	PZE-104010552	7929588	Zm00001d048843	4	Zm00001d048843	LNC_006126	XLOC_060850	lncRNA	Zm00001d048843_T001	Zm00001d048843	sp|Q8L765|BPM1_ARATH BTB/POZ and MATH domain-containing protein 1 OS=Arabidopsis thaliana GN=BPM1 PE=1 SV=1//8.44969e-45	0.968748	2.22797e-07
Forks	PZE-104010552	7929588	Zm00001d048843	4	Zm00001d048843	LNC_005057	XLOC_050695	lncRNA	Zm00001d048843_T001	Zm00001d048843	sp|Q8L765|BPM1_ARATH BTB/POZ and MATH domain-containing protein 1 OS=Arabidopsis thaliana GN=BPM1 PE=1 SV=1//8.44969e-45	0.973658	9.55713e-08
Forks	PZE-104010552	7929588	Zm00001d048843	4	Zm00001d048843	LNC_004793	XLOC_047921	lncRNA	Zm00001d048843_T001	Zm00001d048843	sp|Q8L765|BPM1_ARATH BTB/POZ and MATH domain-containing protein 1 OS=Arabidopsis thaliana GN=BPM1 PE=1 SV=1//8.44969e-45	0.955624	1.25781e-06
Forks	PZE-104010552	7929588	Zm00001d048843	4	Zm00001d048843	LNC_005914	XLOC_059090	lncRNA	Zm00001d048843_T001	Zm00001d048843	sp|Q8L765|BPM1_ARATH BTB/POZ and MATH domain-containing protein 1 OS=Arabidopsis thaliana GN=BPM1 PE=1 SV=1//8.44969e-45	0.965645	3.55755e-07
Forks	PZE-104010552	7929588	Zm00001d048843	4	Zm00001d048843	LNC_004430	XLOC_044417	lncRNA	Zm00001d048843_T001	Zm00001d048843	sp|Q8L765|BPM1_ARATH BTB/POZ and MATH domain-containing protein 1 OS=Arabidopsis thaliana GN=BPM1 PE=1 SV=1//8.44969e-45	0.96962	1.93662e-07
Forks	PZE-104010552	7929588	Zm00001d048843	4	Zm00001d048843	LNC_001278	XLOC_012647	lncRNA	Zm00001d048843_T001	Zm00001d048843	sp|Q8L765|BPM1_ARATH BTB/POZ and MATH domain-containing protein 1 OS=Arabidopsis thaliana GN=BPM1 PE=1 SV=1//8.44969e-45	0.952495	1.75895e-06
Forks	PZE-104010552	7929588	Zm00001d048843	4	Zm00001d048843	LNC_004302	XLOC_043491	lncRNA	Zm00001d048843_T001	Zm00001d048843	sp|Q8L765|BPM1_ARATH BTB/POZ and MATH domain-containing protein 1 OS=Arabidopsis thaliana GN=BPM1 PE=1 SV=1//8.44969e-45	0.985663	4.65769e-09
Forks	PZE-104010552	7929588	Zm00001d048843	4	Zm00001d048843	LNC_000784	XLOC_008061	lncRNA	Zm00001d048843_T001	Zm00001d048843	sp|Q8L765|BPM1_ARATH BTB/POZ and MATH domain-containing protein 1 OS=Arabidopsis thaliana GN=BPM1 PE=1 SV=1//8.44969e-45	0.985536	4.86578e-09
Forks	PZE-104010552	7929588	Zm00001d048843	4	Zm00001d048843	LNC_005412	XLOC_054476	lncRNA	Zm00001d048843_T001	Zm00001d048843	sp|Q8L765|BPM1_ARATH BTB/POZ and MATH domain-containing protein 1 OS=Arabidopsis thaliana GN=BPM1 PE=1 SV=1//8.44969e-45	0.95288	1.68985e-06
Forks	PZE-104010552	7929588	Zm00001d048843	4	Zm00001d048843	LNC_000914	XLOC_009383	lncRNA	Zm00001d048843_T001	Zm00001d048843	sp|Q8L765|BPM1_ARATH BTB/POZ and MATH domain-containing protein 1 OS=Arabidopsis thaliana GN=BPM1 PE=1 SV=1//8.44969e-45	0.987978	1.93846e-09
Forks	PZE-104010552	7929588	Zm00001d048843	4	Zm00001d048843	LNC_003121	XLOC_031100	lncRNA	Zm00001d048843_T001	Zm00001d048843	sp|Q8L765|BPM1_ARATH BTB/POZ and MATH domain-containing protein 1 OS=Arabidopsis thaliana GN=BPM1 PE=1 SV=1//8.44969e-45	0.962478	5.4997e-07
Forks	PZE-104010552	7929588	Zm00001d048843	4	Zm00001d048843	LNC_002994	XLOC_029618	lncRNA	Zm00001d048843_T001	Zm00001d048843	sp|Q8L765|BPM1_ARATH BTB/POZ and MATH domain-containing protein 1 OS=Arabidopsis thaliana GN=BPM1 PE=1 SV=1//8.44969e-45	0.953795	1.53449e-06
Forks	PZE-104010552	7929588	Zm00001d048843	4	Zm00001d048843	LNC_001948	XLOC_019093	lncRNA	Zm00001d048843_T001	Zm00001d048843	sp|Q8L765|BPM1_ARATH BTB/POZ and MATH domain-containing protein 1 OS=Arabidopsis thaliana GN=BPM1 PE=1 SV=1//8.44969e-45	0.974882	7.54985e-08
Forks	PZE-104010552	7929588	Zm00001d048843	4	Zm00001d048843	LNC_003471	XLOC_034908	lncRNA	Zm00001d048843_T001	Zm00001d048843	sp|Q8L765|BPM1_ARATH BTB/POZ and MATH domain-containing protein 1 OS=Arabidopsis thaliana GN=BPM1 PE=1 SV=1//8.44969e-45	0.966146	3.30857e-07
Forks	PZE-104010552	7929588	Zm00001d048843	4	Zm00001d048843	LNC_000803	XLOC_008198	lncRNA	Zm00001d048843_T001	Zm00001d048843	sp|Q8L765|BPM1_ARATH BTB/POZ and MATH domain-containing protein 1 OS=Arabidopsis thaliana GN=BPM1 PE=1 SV=1//8.44969e-45	0.966291	3.23916e-07
Forks	PZE-104010552	7929588	Zm00001d048843	4	Zm00001d048843	LNC_000598	XLOC_006456	lncRNA	Zm00001d048843_T001	Zm00001d048843	sp|Q8L765|BPM1_ARATH BTB/POZ and MATH domain-containing protein 1 OS=Arabidopsis thaliana GN=BPM1 PE=1 SV=1//8.44969e-45	0.970811	1.58881e-07
Forks	PZE-104010552	7929588	Zm00001d048709	4	Zm00001d048709	LNC_005863	XLOC_058474	lncRNA	Zm00001d048709_T002	Zm00001d048709	sp|P42390|TRPA_MAIZE Indole-3-glycerol phosphate lyase, chloroplastic OS=Zea mays GN=BX1 PE=1 SV=2//0	0.954588	1.40909e-06
Forks	PZE-104010552	7929588	Zm00001d048709	4	Zm00001d048709	LNC_003596	XLOC_036107	lncRNA	Zm00001d048709_T002	Zm00001d048709	sp|P42390|TRPA_MAIZE Indole-3-glycerol phosphate lyase, chloroplastic OS=Zea mays GN=BX1 PE=1 SV=2//0	0.96309	5.07091e-07
Forks	PZE-104010552	7929588	Zm00001d048709	4	Zm00001d048709	LNC_003596	XLOC_036107	lncRNA	Zm00001d048709_T001	Zm00001d048709	sp|P42390|TRPA_MAIZE Indole-3-glycerol phosphate lyase, chloroplastic OS=Zea mays GN=BX1 PE=1 SV=2//0	0.987761	2.11848e-09
Forks	PZE-104010552	7929588	Zm00001d048709	4	Zm00001d048709	LNC_006030	XLOC_060074	lncRNA	Zm00001d048709_T002	Zm00001d048709	sp|P42390|TRPA_MAIZE Indole-3-glycerol phosphate lyase, chloroplastic OS=Zea mays GN=BX1 PE=1 SV=2//0	0.975518	6.64732e-08
Forks	PZE-104010552	7929588	Zm00001d048709	4	Zm00001d048709	LNC_002949	XLOC_029109	lncRNA	Zm00001d048709_T002	Zm00001d048709	sp|P42390|TRPA_MAIZE Indole-3-glycerol phosphate lyase, chloroplastic OS=Zea mays GN=BX1 PE=1 SV=2//0	0.958873	8.64698e-07
Forks	PZE-104010552	7929588	Zm00001d048709	4	Zm00001d048709	LNC_002949	XLOC_029109	lncRNA	Zm00001d048709_T001	Zm00001d048709	sp|P42390|TRPA_MAIZE Indole-3-glycerol phosphate lyase, chloroplastic OS=Zea mays GN=BX1 PE=1 SV=2//0	0.95598	1.20889e-06
Forks	PZE-104010552	7929588	Zm00001d048709	4	Zm00001d048709	LNC_001949	XLOC_019128	lncRNA	Zm00001d048709_T001	Zm00001d048709	sp|P42390|TRPA_MAIZE Indole-3-glycerol phosphate lyase, chloroplastic OS=Zea mays GN=BX1 PE=1 SV=2//0	0.962831	5.24912e-07
Forks	PZE-104010552	7929588	Zm00001d048709	4	Zm00001d048709	LNC_004714	XLOC_047166	lncRNA	Zm00001d048709_T002	Zm00001d048709	sp|P42390|TRPA_MAIZE Indole-3-glycerol phosphate lyase, chloroplastic OS=Zea mays GN=BX1 PE=1 SV=2//0	0.954275	1.45756e-06
Forks	PZE-104010552	7929588	Zm00001d048709	4	Zm00001d048709	LNC_004714	XLOC_047166	lncRNA	Zm00001d048709_T001	Zm00001d048709	sp|P42390|TRPA_MAIZE Indole-3-glycerol phosphate lyase, chloroplastic OS=Zea mays GN=BX1 PE=1 SV=2//0	0.970121	1.78375e-07
Forks	PZE-104010552	7929588	Zm00001d048709	4	Zm00001d048709	LNC_003937	XLOC_040059	lncRNA	Zm00001d048709_T002	Zm00001d048709	sp|P42390|TRPA_MAIZE Indole-3-glycerol phosphate lyase, chloroplastic OS=Zea mays GN=BX1 PE=1 SV=2//0	0.955976	1.20938e-06
Forks	PZE-104010552	7929588	Zm00001d048709	4	Zm00001d048709	LNC_003937	XLOC_040059	lncRNA	Zm00001d048709_T001	Zm00001d048709	sp|P42390|TRPA_MAIZE Indole-3-glycerol phosphate lyase, chloroplastic OS=Zea mays GN=BX1 PE=1 SV=2//0	0.961628	6.14241e-07
Forks	PZE-104010552	7929588	Zm00001d048709	4	Zm00001d048709	LNC_000159	XLOC_001822	lncRNA	Zm00001d048709_T002	Zm00001d048709	sp|P42390|TRPA_MAIZE Indole-3-glycerol phosphate lyase, chloroplastic OS=Zea mays GN=BX1 PE=1 SV=2//0	0.980707	2.03806e-08
Forks	PZE-104010552	7929588	Zm00001d048709	4	Zm00001d048709	LNC_002395	XLOC_023692	lncRNA	Zm00001d048709_T001	Zm00001d048709	sp|P42390|TRPA_MAIZE Indole-3-glycerol phosphate lyase, chloroplastic OS=Zea mays GN=BX1 PE=1 SV=2//0	0.967734	2.60886e-07
Forks	PZE-104010552	7929588	Zm00001d048709	4	Zm00001d048709	LNC_002151	XLOC_021495	lncRNA	Zm00001d048709_T002	Zm00001d048709	sp|P42390|TRPA_MAIZE Indole-3-glycerol phosphate lyase, chloroplastic OS=Zea mays GN=BX1 PE=1 SV=2//0	0.956096	1.19322e-06
Forks	PZE-104010552	7929588	Zm00001d048709	4	Zm00001d048709	LNC_003466	XLOC_034882	lncRNA	Zm00001d048709_T002	Zm00001d048709	sp|P42390|TRPA_MAIZE Indole-3-glycerol phosphate lyase, chloroplastic OS=Zea mays GN=BX1 PE=1 SV=2//0	0.979333	2.86835e-08
Forks	PZE-104010552	7929588	Zm00001d048709	4	Zm00001d048709	LNC_006118	XLOC_060772	lncRNA	Zm00001d048709_T002	Zm00001d048709	sp|P42390|TRPA_MAIZE Indole-3-glycerol phosphate lyase, chloroplastic OS=Zea mays GN=BX1 PE=1 SV=2//0	0.972036	1.28495e-07
Forks	PZE-104010552	7929588	Zm00001d048709	4	Zm00001d048709	LNC_006118	XLOC_060772	lncRNA	Zm00001d048709_T001	Zm00001d048709	sp|P42390|TRPA_MAIZE Indole-3-glycerol phosphate lyase, chloroplastic OS=Zea mays GN=BX1 PE=1 SV=2//0	0.977404	4.46712e-08
Forks	PZE-104010552	7929588	Zm00001d048709	4	Zm00001d048709	LNC_002609	XLOC_025704	lncRNA	Zm00001d048709_T002	Zm00001d048709	sp|P42390|TRPA_MAIZE Indole-3-glycerol phosphate lyase, chloroplastic OS=Zea mays GN=BX1 PE=1 SV=2//0	0.970278	1.7377e-07
Forks	PZE-104010552	7929588	Zm00001d048709	4	Zm00001d048709	LNC_000192	XLOC_002027	lncRNA	Zm00001d048709_T001	Zm00001d048709	sp|P42390|TRPA_MAIZE Indole-3-glycerol phosphate lyase, chloroplastic OS=Zea mays GN=BX1 PE=1 SV=2//0	0.950502	2.15282e-06
Forks	PZE-104010552	7929588	Zm00001d048709	4	Zm00001d048709	LNC_004347	XLOC_043825	lncRNA	Zm00001d048709_T002	Zm00001d048709	sp|P42390|TRPA_MAIZE Indole-3-glycerol phosphate lyase, chloroplastic OS=Zea mays GN=BX1 PE=1 SV=2//0	0.968076	2.47501e-07
Forks	PZE-104010552	7929588	Zm00001d048709	4	Zm00001d048709	LNC_004347	XLOC_043825	lncRNA	Zm00001d048709_T001	Zm00001d048709	sp|P42390|TRPA_MAIZE Indole-3-glycerol phosphate lyase, chloroplastic OS=Zea mays GN=BX1 PE=1 SV=2//0	0.99138	3.69448e-10
Forks	PZE-104010552	7929588	Zm00001d048709	4	Zm00001d048709	LNC_002839	XLOC_028306	lncRNA	Zm00001d048709_T002	Zm00001d048709	sp|P42390|TRPA_MAIZE Indole-3-glycerol phosphate lyase, chloroplastic OS=Zea mays GN=BX1 PE=1 SV=2//0	0.952409	1.77465e-06
Forks	PZE-104010552	7929588	Zm00001d048709	4	Zm00001d048709	LNC_001578	XLOC_015219	lncRNA	Zm00001d048709_T002	Zm00001d048709	sp|P42390|TRPA_MAIZE Indole-3-glycerol phosphate lyase, chloroplastic OS=Zea mays GN=BX1 PE=1 SV=2//0	0.987723	2.15173e-09
Forks	PZE-104010552	7929588	Zm00001d048709	4	Zm00001d048709	LNC_005569	XLOC_055627	lncRNA	Zm00001d048709_T002	Zm00001d048709	sp|P42390|TRPA_MAIZE Indole-3-glycerol phosphate lyase, chloroplastic OS=Zea mays GN=BX1 PE=1 SV=2//0	0.963317	4.91871e-07
Forks	PZE-104010552	7929588	Zm00001d048709	4	Zm00001d048709	LNC_006050	XLOC_060174	lncRNA	Zm00001d048709_T002	Zm00001d048709	sp|P42390|TRPA_MAIZE Indole-3-glycerol phosphate lyase, chloroplastic OS=Zea mays GN=BX1 PE=1 SV=2//0	0.968035	2.49074e-07
Forks	PZE-104010552	7929588	Zm00001d048709	4	Zm00001d048709	LNC_001599	XLOC_015371	lncRNA	Zm00001d048709_T002	Zm00001d048709	sp|P42390|TRPA_MAIZE Indole-3-glycerol phosphate lyase, chloroplastic OS=Zea mays GN=BX1 PE=1 SV=2//0	0.951477	1.95221e-06
Forks	PZE-104010552	7929588	Zm00001d048709	4	Zm00001d048709	LNC_001599	XLOC_015371	lncRNA	Zm00001d048709_T001	Zm00001d048709	sp|P42390|TRPA_MAIZE Indole-3-glycerol phosphate lyase, chloroplastic OS=Zea mays GN=BX1 PE=1 SV=2//0	0.963175	5.01352e-07
Forks	PZE-104010552	7929588	Zm00001d048709	4	Zm00001d048709	LNC_003233	XLOC_032084	lncRNA	Zm00001d048709_T002	Zm00001d048709	sp|P42390|TRPA_MAIZE Indole-3-glycerol phosphate lyase, chloroplastic OS=Zea mays GN=BX1 PE=1 SV=2//0	0.966333	3.2193e-07
Forks	PZE-104010552	7929588	Zm00001d048709	4	Zm00001d048709	LNC_002496	XLOC_024859	lncRNA	Zm00001d048709_T002	Zm00001d048709	sp|P42390|TRPA_MAIZE Indole-3-glycerol phosphate lyase, chloroplastic OS=Zea mays GN=BX1 PE=1 SV=2//0	0.98605	4.06393e-09
Forks	PZE-104010552	7929588	Zm00001d048709	4	Zm00001d048709	LNC_002496	XLOC_024859	lncRNA	Zm00001d048709_T001	Zm00001d048709	sp|P42390|TRPA_MAIZE Indole-3-glycerol phosphate lyase, chloroplastic OS=Zea mays GN=BX1 PE=1 SV=2//0	0.976684	5.21866e-08
Forks	PZE-104010552	7929588	Zm00001d048709	4	Zm00001d048709	LNC_000654	XLOC_006938	lncRNA	Zm00001d048709_T002	Zm00001d048709	sp|P42390|TRPA_MAIZE Indole-3-glycerol phosphate lyase, chloroplastic OS=Zea mays GN=BX1 PE=1 SV=2//0	0.952706	1.72091e-06
Forks	PZE-104010552	7929588	Zm00001d048709	4	Zm00001d048709	LNC_000654	XLOC_006938	lncRNA	Zm00001d048709_T001	Zm00001d048709	sp|P42390|TRPA_MAIZE Indole-3-glycerol phosphate lyase, chloroplastic OS=Zea mays GN=BX1 PE=1 SV=2//0	0.978604	3.40724e-08
Forks	PZE-104010552	7929588	Zm00001d048709	4	Zm00001d048709	LNC_004118	XLOC_041573	lncRNA	Zm00001d048709_T002	Zm00001d048709	sp|P42390|TRPA_MAIZE Indole-3-glycerol phosphate lyase, chloroplastic OS=Zea mays GN=BX1 PE=1 SV=2//0	0.991619	3.21101e-10
Forks	PZE-104010552	7929588	Zm00001d048709	4	Zm00001d048709	LNC_004118	XLOC_041573	lncRNA	Zm00001d048709_T001	Zm00001d048709	sp|P42390|TRPA_MAIZE Indole-3-glycerol phosphate lyase, chloroplastic OS=Zea mays GN=BX1 PE=1 SV=2//0	0.9688	2.20948e-07
Forks	PZE-104010552	7929588	Zm00001d048709	4	Zm00001d048709	LNC_006010	XLOC_059930	lncRNA	Zm00001d048709_T002	Zm00001d048709	sp|P42390|TRPA_MAIZE Indole-3-glycerol phosphate lyase, chloroplastic OS=Zea mays GN=BX1 PE=1 SV=2//0	0.96865	2.2625e-07
Forks	PZE-104010552	7929588	Zm00001d048709	4	Zm00001d048709	LNC_004591	XLOC_046249	lncRNA	Zm00001d048709_T002	Zm00001d048709	sp|P42390|TRPA_MAIZE Indole-3-glycerol phosphate lyase, chloroplastic OS=Zea mays GN=BX1 PE=1 SV=2//0	0.966574	3.1067e-07
Forks	PZE-104010552	7929588	Zm00001d048709	4	Zm00001d048709	LNC_002502	XLOC_024901	lncRNA	Zm00001d048709_T002	Zm00001d048709	sp|P42390|TRPA_MAIZE Indole-3-glycerol phosphate lyase, chloroplastic OS=Zea mays GN=BX1 PE=1 SV=2//0	0.958851	8.67027e-07
Forks	PZE-104010552	7929588	Zm00001d048709	4	Zm00001d048709	LNC_001248	XLOC_012353	lncRNA	Zm00001d048709_T002	Zm00001d048709	sp|P42390|TRPA_MAIZE Indole-3-glycerol phosphate lyase, chloroplastic OS=Zea mays GN=BX1 PE=1 SV=2//0	0.953503	1.58279e-06
Forks	PZE-104010552	7929588	Zm00001d048709	4	Zm00001d048709	LNC_002227	XLOC_022066	lncRNA	Zm00001d048709_T001	Zm00001d048709	sp|P42390|TRPA_MAIZE Indole-3-glycerol phosphate lyase, chloroplastic OS=Zea mays GN=BX1 PE=1 SV=2//0	0.955554	1.26755e-06
Forks	PZE-104010552	7929588	Zm00001d048709	4	Zm00001d048709	LNC_004871	XLOC_048920	lncRNA	Zm00001d048709_T002	Zm00001d048709	sp|P42390|TRPA_MAIZE Indole-3-glycerol phosphate lyase, chloroplastic OS=Zea mays GN=BX1 PE=1 SV=2//0	0.988875	1.31701e-09
Forks	PZE-104010552	7929588	Zm00001d048709	4	Zm00001d048709	LNC_005058	XLOC_050708	lncRNA	Zm00001d048709_T002	Zm00001d048709	sp|P42390|TRPA_MAIZE Indole-3-glycerol phosphate lyase, chloroplastic OS=Zea mays GN=BX1 PE=1 SV=2//0	0.950638	2.12392e-06
CRN	PZE-105047221	36532569	Zm00001d014555	5	Zm00001d014555	LNC_002848	XLOC_028394	lncRNA	Zm00001d014555_T001	Zm00001d014555	sp|Q9C7S5|PSYR1_ARATH Tyrosine-sulfated glycopeptide receptor 1 OS=Arabidopsis thaliana GN=PSYR1 PE=2 SV=1//7.85136e-09	0.962625	5.39421e-07
CRN	PZE-105047221	36532569	Zm00001d014555	5	Zm00001d014555	LNC_003725	XLOC_037778	lncRNA	Zm00001d014555_T001	Zm00001d014555	sp|Q9C7S5|PSYR1_ARATH Tyrosine-sulfated glycopeptide receptor 1 OS=Arabidopsis thaliana GN=PSYR1 PE=2 SV=1//7.85136e-09	0.958515	9.02434e-07
CRN	PZE-105047221	36532569	Zm00001d014555	5	Zm00001d014555	LNC_005339	XLOC_053745	lncRNA	Zm00001d014555_T001	Zm00001d014555	sp|Q9C7S5|PSYR1_ARATH Tyrosine-sulfated glycopeptide receptor 1 OS=Arabidopsis thaliana GN=PSYR1 PE=2 SV=1//7.85136e-09	0.958652	8.87917e-07
CRN	PZE-105047221	36532569	Zm00001d014555	5	Zm00001d014555	LNC_004243	XLOC_042706	lncRNA	Zm00001d014555_T001	Zm00001d014555	sp|Q9C7S5|PSYR1_ARATH Tyrosine-sulfated glycopeptide receptor 1 OS=Arabidopsis thaliana GN=PSYR1 PE=2 SV=1//7.85136e-09	0.960399	7.17634e-07
CRN	PZE-105047221	36532569	Zm00001d014555	5	Zm00001d014555	LNC_005806	XLOC_057944	lncRNA	Zm00001d014555_T001	Zm00001d014555	sp|Q9C7S5|PSYR1_ARATH Tyrosine-sulfated glycopeptide receptor 1 OS=Arabidopsis thaliana GN=PSYR1 PE=2 SV=1//7.85136e-09	0.976163	5.82301e-08
CRN	PZE-105047221	36532569	Zm00001d014555	5	Zm00001d014555	LNC_000941	XLOC_009640	lncRNA	Zm00001d014555_T001	Zm00001d014555	sp|Q9C7S5|PSYR1_ARATH Tyrosine-sulfated glycopeptide receptor 1 OS=Arabidopsis thaliana GN=PSYR1 PE=2 SV=1//7.85136e-09	0.973022	1.07558e-07
CRN	PZE-105047221	36532569	Zm00001d014555	5	Zm00001d014555	LNC_001439	XLOC_014433	lncRNA	Zm00001d014555_T001	Zm00001d014555	sp|Q9C7S5|PSYR1_ARATH Tyrosine-sulfated glycopeptide receptor 1 OS=Arabidopsis thaliana GN=PSYR1 PE=2 SV=1//7.85136e-09	0.963839	4.58244e-07
CRN	PZE-105047221	36532569	Zm00001d014555	5	Zm00001d014555	LNC_002408	XLOC_023847	lncRNA	Zm00001d014555_T001	Zm00001d014555	sp|Q9C7S5|PSYR1_ARATH Tyrosine-sulfated glycopeptide receptor 1 OS=Arabidopsis thaliana GN=PSYR1 PE=2 SV=1//7.85136e-09	0.980818	1.98035e-08
CRN	PZE-105047221	36532569	Zm00001d014555	5	Zm00001d014555	LNC_003360	XLOC_033571	lncRNA	Zm00001d014555_T001	Zm00001d014555	sp|Q9C7S5|PSYR1_ARATH Tyrosine-sulfated glycopeptide receptor 1 OS=Arabidopsis thaliana GN=PSYR1 PE=2 SV=1//7.85136e-09	0.962559	5.441e-07
CRN	PZE-105047221	36532569	Zm00001d014555	5	Zm00001d014555	LNC_002143	XLOC_021435	lncRNA	Zm00001d014555_T001	Zm00001d014555	sp|Q9C7S5|PSYR1_ARATH Tyrosine-sulfated glycopeptide receptor 1 OS=Arabidopsis thaliana GN=PSYR1 PE=2 SV=1//7.85136e-09	0.954902	1.3618e-06
CRN	PZE-105047221	36532569	Zm00001d014555	5	Zm00001d014555	LNC_001492	XLOC_014766	lncRNA	Zm00001d014555_T001	Zm00001d014555	sp|Q9C7S5|PSYR1_ARATH Tyrosine-sulfated glycopeptide receptor 1 OS=Arabidopsis thaliana GN=PSYR1 PE=2 SV=1//7.85136e-09	0.964674	4.08323e-07
CRN	PZE-105047221	36532569	Zm00001d014555	5	Zm00001d014555	LNC_003955	XLOC_040193	lncRNA	Zm00001d014555_T001	Zm00001d014555	sp|Q9C7S5|PSYR1_ARATH Tyrosine-sulfated glycopeptide receptor 1 OS=Arabidopsis thaliana GN=PSYR1 PE=2 SV=1//7.85136e-09	0.967868	2.55582e-07
CRN	PZE-105047221	36532569	Zm00001d014555	5	Zm00001d014555	LNC_003954	XLOC_040192	lncRNA	Zm00001d014555_T001	Zm00001d014555	sp|Q9C7S5|PSYR1_ARATH Tyrosine-sulfated glycopeptide receptor 1 OS=Arabidopsis thaliana GN=PSYR1 PE=2 SV=1//7.85136e-09	0.975616	6.517e-08
CRN	PZE-105047221	36532569	Zm00001d014555	5	Zm00001d014555	LNC_001499	XLOC_014812	lncRNA	Zm00001d014555_T001	Zm00001d014555	sp|Q9C7S5|PSYR1_ARATH Tyrosine-sulfated glycopeptide receptor 1 OS=Arabidopsis thaliana GN=PSYR1 PE=2 SV=1//7.85136e-09	0.958401	9.14753e-07
CRN	PZE-105047221	36532569	Zm00001d014555	5	Zm00001d014555	LNC_005249	XLOC_052519	lncRNA	Zm00001d014555_T001	Zm00001d014555	sp|Q9C7S5|PSYR1_ARATH Tyrosine-sulfated glycopeptide receptor 1 OS=Arabidopsis thaliana GN=PSYR1 PE=2 SV=1//7.85136e-09	0.962494	5.48821e-07
CRN	PZE-105047221	36532569	Zm00001d014555	5	Zm00001d014555	LNC_002292	XLOC_022688	lncRNA	Zm00001d014555_T001	Zm00001d014555	sp|Q9C7S5|PSYR1_ARATH Tyrosine-sulfated glycopeptide receptor 1 OS=Arabidopsis thaliana GN=PSYR1 PE=2 SV=1//7.85136e-09	0.953711	1.54815e-06
CRN	PZE-105047221	36532569	Zm00001d014555	5	Zm00001d014555	LNC_000615	XLOC_006604	lncRNA	Zm00001d014555_T001	Zm00001d014555	sp|Q9C7S5|PSYR1_ARATH Tyrosine-sulfated glycopeptide receptor 1 OS=Arabidopsis thaliana GN=PSYR1 PE=2 SV=1//7.85136e-09	0.961573	6.18641e-07
CRN	PZE-105047221	36532569	Zm00001d014555	5	Zm00001d014555	LNC_005902	XLOC_058970	lncRNA	Zm00001d014555_T001	Zm00001d014555	sp|Q9C7S5|PSYR1_ARATH Tyrosine-sulfated glycopeptide receptor 1 OS=Arabidopsis thaliana GN=PSYR1 PE=2 SV=1//7.85136e-09	0.962216	5.69202e-07
CRN	PZE-105047221	36532569	Zm00001d014555	5	Zm00001d014555	LNC_002107	XLOC_020996	lncRNA	Zm00001d014555_T001	Zm00001d014555	sp|Q9C7S5|PSYR1_ARATH Tyrosine-sulfated glycopeptide receptor 1 OS=Arabidopsis thaliana GN=PSYR1 PE=2 SV=1//7.85136e-09	0.963383	4.87518e-07
CRN	PZE-105047221	36532569	Zm00001d014555	5	Zm00001d014555	LNC_002035	XLOC_019943	lncRNA	Zm00001d014555_T001	Zm00001d014555	sp|Q9C7S5|PSYR1_ARATH Tyrosine-sulfated glycopeptide receptor 1 OS=Arabidopsis thaliana GN=PSYR1 PE=2 SV=1//7.85136e-09	0.975167	7.13403e-08
CRN	PZE-105047221	36532569	Zm00001d014555	5	Zm00001d014555	LNC_002326	XLOC_022952	lncRNA	Zm00001d014555_T001	Zm00001d014555	sp|Q9C7S5|PSYR1_ARATH Tyrosine-sulfated glycopeptide receptor 1 OS=Arabidopsis thaliana GN=PSYR1 PE=2 SV=1//7.85136e-09	0.959736	7.78881e-07
CRN	PZE-105047221	36532569	Zm00001d014555	5	Zm00001d014555	LNC_003532	XLOC_035585	lncRNA	Zm00001d014555_T001	Zm00001d014555	sp|Q9C7S5|PSYR1_ARATH Tyrosine-sulfated glycopeptide receptor 1 OS=Arabidopsis thaliana GN=PSYR1 PE=2 SV=1//7.85136e-09	0.952572	1.74494e-06
CRN	PZE-105047221	36532569	Zm00001d014555	5	Zm00001d014555	LNC_006171	XLOC_061519	lncRNA	Zm00001d014555_T001	Zm00001d014555	sp|Q9C7S5|PSYR1_ARATH Tyrosine-sulfated glycopeptide receptor 1 OS=Arabidopsis thaliana GN=PSYR1 PE=2 SV=1//7.85136e-09	0.978095	3.82902e-08
CRN	PZE-105047221	36532569	Zm00001d014555	5	Zm00001d014555	LNC_003584	XLOC_035991	lncRNA	Zm00001d014555_T001	Zm00001d014555	sp|Q9C7S5|PSYR1_ARATH Tyrosine-sulfated glycopeptide receptor 1 OS=Arabidopsis thaliana GN=PSYR1 PE=2 SV=1//7.85136e-09	0.976248	5.72134e-08
CRN	PZE-105047221	36532569	Zm00001d014555	5	Zm00001d014555	LNC_005538	XLOC_055393	lncRNA	Zm00001d014555_T001	Zm00001d014555	sp|Q9C7S5|PSYR1_ARATH Tyrosine-sulfated glycopeptide receptor 1 OS=Arabidopsis thaliana GN=PSYR1 PE=2 SV=1//7.85136e-09	0.962098	5.78019e-07
CRN	PZE-105047221	36532569	Zm00001d014555	5	Zm00001d014555	LNC_000901	XLOC_009293	lncRNA	Zm00001d014555_T001	Zm00001d014555	sp|Q9C7S5|PSYR1_ARATH Tyrosine-sulfated glycopeptide receptor 1 OS=Arabidopsis thaliana GN=PSYR1 PE=2 SV=1//7.85136e-09	0.957541	1.01181e-06
CRN	PZE-105047221	36532569	Zm00001d014555	5	Zm00001d014555	LNC_001316	XLOC_013058	lncRNA	Zm00001d014555_T001	Zm00001d014555	sp|Q9C7S5|PSYR1_ARATH Tyrosine-sulfated glycopeptide receptor 1 OS=Arabidopsis thaliana GN=PSYR1 PE=2 SV=1//7.85136e-09	0.951145	2.01892e-06
CRN	PZE-105047208/PZE-105055234	36530957/53003343	Zm00001d014557	5	Zm00001d014557	LNC_001292	XLOC_012835	lncRNA	Zm00001d014557_T001	Zm00001d014557	sp|Q9C7S5|PSYR1_ARATH Tyrosine-sulfated glycopeptide receptor 1 OS=Arabidopsis thaliana GN=PSYR1 PE=2 SV=1//2.16944e-08	0.957602	1.00468e-06
CRN	PZE-105047208/PZE-105055234	36530957/53003343	Zm00001d014557	5	Zm00001d014557	LNC_001293	XLOC_012840	lncRNA	Zm00001d014557_T001	Zm00001d014557	sp|Q9C7S5|PSYR1_ARATH Tyrosine-sulfated glycopeptide receptor 1 OS=Arabidopsis thaliana GN=PSYR1 PE=2 SV=1//2.16944e-08	0.955375	1.29283e-06
CRN	PZE-105047208/PZE-105055234	36530957/53003343	Zm00001d014557	5	Zm00001d014557	LNC_000080	XLOC_001166	lncRNA	Zm00001d014557_T001	Zm00001d014557	sp|Q9C7S5|PSYR1_ARATH Tyrosine-sulfated glycopeptide receptor 1 OS=Arabidopsis thaliana GN=PSYR1 PE=2 SV=1//2.16944e-08	0.975209	7.07406e-08
CRN	PZE-105047208/PZE-105055234	36530957/53003343	Zm00001d014557	5	Zm00001d014557	LNC_005263	XLOC_052650	lncRNA	Zm00001d014557_T001	Zm00001d014557	sp|Q9C7S5|PSYR1_ARATH Tyrosine-sulfated glycopeptide receptor 1 OS=Arabidopsis thaliana GN=PSYR1 PE=2 SV=1//2.16944e-08	0.965016	3.89151e-07
CRN	PZE-105047208/PZE-105055234	36530957/53003343	Zm00001d014557	5	Zm00001d014557	LNC_000866	XLOC_008901	lncRNA	Zm00001d014557_T001	Zm00001d014557	sp|Q9C7S5|PSYR1_ARATH Tyrosine-sulfated glycopeptide receptor 1 OS=Arabidopsis thaliana GN=PSYR1 PE=2 SV=1//2.16944e-08	0.955396	1.2899e-06
CRN	PZE-105047208/PZE-105055234	36530957/53003343	Zm00001d014557	5	Zm00001d014557	LNC_000063	XLOC_000869	lncRNA	Zm00001d014557_T001	Zm00001d014557	sp|Q9C7S5|PSYR1_ARATH Tyrosine-sulfated glycopeptide receptor 1 OS=Arabidopsis thaliana GN=PSYR1 PE=2 SV=1//2.16944e-08	0.963709	4.66408e-07
CRN	PZE-105047208/PZE-105055234	36530957/53003343	Zm00001d014557	5	Zm00001d014557	LNC_001825	XLOC_018225	lncRNA	Zm00001d014557_T001	Zm00001d014557	sp|Q9C7S5|PSYR1_ARATH Tyrosine-sulfated glycopeptide receptor 1 OS=Arabidopsis thaliana GN=PSYR1 PE=2 SV=1//2.16944e-08	0.967411	2.74074e-07
CRN	PZE-105047208/PZE-105055234	36530957/53003343	Zm00001d014557	5	Zm00001d014557	LNC_002107	XLOC_020996	lncRNA	Zm00001d014557_T001	Zm00001d014557	sp|Q9C7S5|PSYR1_ARATH Tyrosine-sulfated glycopeptide receptor 1 OS=Arabidopsis thaliana GN=PSYR1 PE=2 SV=1//2.16944e-08	0.954449	1.43047e-06
CRN	PZE-105047208/PZE-105055234	36530957/53003343	Zm00001d014557	5	Zm00001d014557	LNC_003531	XLOC_035581	lncRNA	Zm00001d014557_T001	Zm00001d014557	sp|Q9C7S5|PSYR1_ARATH Tyrosine-sulfated glycopeptide receptor 1 OS=Arabidopsis thaliana GN=PSYR1 PE=2 SV=1//2.16944e-08	0.960387	7.18738e-07
CRN	PZE-105047208/PZE-105055234	36530957/53003343	Zm00001d014557	5	Zm00001d014557	LNC_004401	XLOC_044160	lncRNA	Zm00001d014557_T001	Zm00001d014557	sp|Q9C7S5|PSYR1_ARATH Tyrosine-sulfated glycopeptide receptor 1 OS=Arabidopsis thaliana GN=PSYR1 PE=2 SV=1//2.16944e-08	0.955838	1.22812e-06
Forks	PUT-163a-91875212-4781	7724698	Zm00001d013269	5	Zm00001d013269	LNC_005843	XLOC_058305	lncRNA	Zm00001d013269_T001	Zm00001d013269	sp|A7LXU3|BGH3B_BACO1 Beta-glucosidase BoGH3B OS=Bacteroides ovatus (strain ATCC 8483 / DSM 1896 / JCM 5824 / NCTC 11153) GN=BACOVA_02659 PE=1 SV=1//2.78969e-86	0.950291	2.19835e-06
Forks	PUT-163a-91875212-4781	7724698	Zm00001d013269	5	Zm00001d013269	LNC_005261	XLOC_052624	lncRNA	Zm00001d013269_T001	Zm00001d013269	sp|A7LXU3|BGH3B_BACO1 Beta-glucosidase BoGH3B OS=Bacteroides ovatus (strain ATCC 8483 / DSM 1896 / JCM 5824 / NCTC 11153) GN=BACOVA_02659 PE=1 SV=1//2.78969e-86	0.963136	5.03976e-07
Forks	PUT-163a-91875212-4781	7724698	Zm00001d013269	5	Zm00001d013269	LNC_002966	XLOC_029276	lncRNA	Zm00001d013269_T001	Zm00001d013269	sp|A7LXU3|BGH3B_BACO1 Beta-glucosidase BoGH3B OS=Bacteroides ovatus (strain ATCC 8483 / DSM 1896 / JCM 5824 / NCTC 11153) GN=BACOVA_02659 PE=1 SV=1//2.78969e-86	0.953765	1.53928e-06
Forks	PUT-163a-91875212-4781	7724698	Zm00001d013269	5	Zm00001d013269	LNC_004283	XLOC_043362	lncRNA	Zm00001d013269_T001	Zm00001d013269	sp|A7LXU3|BGH3B_BACO1 Beta-glucosidase BoGH3B OS=Bacteroides ovatus (strain ATCC 8483 / DSM 1896 / JCM 5824 / NCTC 11153) GN=BACOVA_02659 PE=1 SV=1//2.78969e-86	0.975391	6.82089e-08
Forks	PUT-163a-91875212-4781	7724698	Zm00001d013269	5	Zm00001d013269	LNC_002313	XLOC_022897	lncRNA	Zm00001d013269_T001	Zm00001d013269	sp|A7LXU3|BGH3B_BACO1 Beta-glucosidase BoGH3B OS=Bacteroides ovatus (strain ATCC 8483 / DSM 1896 / JCM 5824 / NCTC 11153) GN=BACOVA_02659 PE=1 SV=1//2.78969e-86	0.968302	2.38962e-07
Forks	PUT-163a-91875212-4781	7724698	Zm00001d013269	5	Zm00001d013269	LNC_001092	XLOC_010885	lncRNA	Zm00001d013269_T001	Zm00001d013269	sp|A7LXU3|BGH3B_BACO1 Beta-glucosidase BoGH3B OS=Bacteroides ovatus (strain ATCC 8483 / DSM 1896 / JCM 5824 / NCTC 11153) GN=BACOVA_02659 PE=1 SV=1//2.78969e-86	0.953995	1.50211e-06
Forks	PUT-163a-91875212-4781	7724698	Zm00001d013269	5	Zm00001d013269	LNC_003102	XLOC_030887	lncRNA	Zm00001d013269_T001	Zm00001d013269	sp|A7LXU3|BGH3B_BACO1 Beta-glucosidase BoGH3B OS=Bacteroides ovatus (strain ATCC 8483 / DSM 1896 / JCM 5824 / NCTC 11153) GN=BACOVA_02659 PE=1 SV=1//2.78969e-86	0.980955	1.91105e-08
