# Supplementary material for: Transcriptomic and Genome-wide Association Study Reveal Long Noncoding RNAs&nbsp;Responding to Nitrogen Deficiency in Maize
Source: Research Square preprint supplement (doi:10.21203/rs.3.rs-104831/v1), 2020-11-13
Supplement: Supplementary file 3 [file 996f6872639ca2b445509a01.xlsx]

## Sheet: Sheet2
	Supporting Table 8. Pearson (r) correlations between all 17 traits

## Sheet: Correlations
High nitrogen
	SL	LN	PRL	CRN	SRN	RFW	SFW	RDW	LDW	PBW	TRL	SUA	AVD	ROV	TIP	FOR	CRO
SL		0.34	0.54	0.17	0.03	0.62	0.84	0.82	0.51	0.76	0.61	0.62	-0.25	0.51	0.51	0.55	0.45
LN	0.27		0.17	0.17	0.09	0.28	0.38	0.34	0.22	0.33	0.32	0.31	-0.12	0.25	0.32	0.3	0.27
PRL	0.49	0.12		0.01	-0.16	0.58	0.54	0.5	0.42	0.49	0.6	0.61	-0.29	0.48	0.51	0.43	0.39
CRN	0.04	0.13	-0.11		-0.06	0.19	0.17	0.11	0.22	0.16	0.15	0.16	-0.05	0.14	0.13	0.19	0.1
SRN	0.06	0.09	-0.08	0.01		0.08	-0.02	0.04	0.18	0.1	0.03	0.08	0.09	0.13	-0.01	0.03	0.03
RFW	0.59	0.14	0.53	0.15	0.11		0.74	0.71	0.83	0.77	0.72	0.9	0.09	0.9	0.51	0.62	0.46
SFW	0.85	0.27	0.51	0.03	0.03	0.73		0.92	0.65	0.88	0.68	0.72	-0.15	0.63	0.57	0.62	0.51
RDW	0.82	0.24	0.44	0.04	0.04	0.68	0.93		0.72	0.97	0.66	0.71	-0.1	0.63	0.54	0.58	0.49
LDW	0.51	0.08	0.38	0.19	0.15	0.88	0.66	0.67		0.86	0.67	0.79	0.07	0.78	0.54	0.58	0.46
PBW	0.76	0.19	0.45	0.11	0.09	0.81	0.89	0.95	0.86		0.7	0.77	-0.06	0.7	0.57	0.61	0.51
TRL	0.61	0.21	0.52	0.06	0.03	0.73	0.72	0.67	0.67	0.73		0.9	-0.44	0.64	0.81	0.91	0.87
SUA	0.61	0.18	0.51	0.11	0.08	0.88	0.74	0.71	0.81	0.8	0.92		-0.1	0.89	0.63	0.8	0.69
AVD	-0.36	-0.08	-0.35	0.02	0.12	-0.04	-0.31	-0.24	0.01	-0.16	-0.52	-0.25		0.28	-0.56	-0.43	-0.53
ROV	0.5	0.13	0.41	0.14	0.13	0.89	0.64	0.63	0.84	0.77	0.7	0.91	0.12		0.34	0.56	0.39
TIP	0.56	0.17	0.48	0.03	-0.02	0.55	0.64	0.58	0.51	0.6	0.87	0.73	-0.65	0.46		0.8	0.78
FOR	0.57	0.19	0.35	0.09	-0.02	0.6	0.65	0.61	0.57	0.64	0.91	0.81	-0.52	0.58	0.87		0.92
CRO	0.52	0.19	0.34	0.04	-0.03	0.51	0.61	0.57	0.47	0.58	0.89	0.74	-0.58	0.48	0.84	0.93
Low nitrogen
