# Supplementary material for: Transcriptomic and Genome-wide Association Study Reveal Long Noncoding RNAs&nbsp;Responding to Nitrogen Deficiency in Maize
Source: Research Square preprint supplement (doi:10.21203/rs.3.rs-104831/v1), 2020-11-13
Supplement: Supplementary file 4 [file a2e252211f46d2f46f257fdb.xlsx]

## Sheet: Sheet1
Supporting Table 6. The KEGG analysis of lncRNAs

## Sheet: co_expression_R
pathway_term_Top20	gene_number		Term	Sample number	Background number	P-value	Corrected P-value	UniGenes	KO	Entrez ID	Ensembl ID	Gene name
Photosynthesis	74		Photosynthesis	74	101	1.22609e-05	0.00154487	Zm00001d052242 Zm00001d023713 Zm00001d008706 Zm00001d035002 Zm00001d042175 Zm00001d035001 Zm00001d042178 Zm00001d029049 Zm00001d021703 Zm00001d013039 Zm00001d045620 GRMZM5G856777 GRMZM5G800780 Zm00001d000417 Zm00001d033469 Zm00001d020877 Zm00001d006540 Zm00001d000282 Zm00001d039687 Zm00001d014564 Zm00001d010136 Zm00001d021825 Zm00001d007857 Zm00001d046177 Zm00001d034099 GRMZM5G831399 Zm00001d0456…	zma:100281924 zma:103640891 zma:100281679 zma:103628935 zma:103650783 zma:101027099 zma:100284876 zma:100282043 zma:103633267 zma:100191984 zma:100192779 zma:845201 zma:845192 zma:845199 zma:100284745 zma:100284847 zma:103647735 zma:845200 zma:100281679 zma:100191684 zma:100281226 zma:100382419 zma:107648855 zma:845193 zma:103640685 zma:845205 zma:100192779 zma:845191 zma:845170 zma:845203 zma:10…	100281924 103640891 100281679 103628935 103650783 101027099 100284876 100282043 103633267 100191984 100192779 845201 845192 845199 100284745 100284847 103647735 845200 100281679 100191684 100281226 100382419 107648855 845193 103640685 845205 100192779 845191 845170 845203 100281199 541612 100191684 100281877 100273120 100282643 845195 541626 1466379 103629356 100280994 100286020 845174 845170 100…	GRMZM2G009048 fdx5, GRMZM2G122327 FDX1, GRMZM2G122337 GRMZM2G132506 GRMZM2G056424 GRMZM2G013342 psbC, ZemaCp008 petB, ZemaCp052 psbA, ZemaCp002 GRMZM2G377855 GRMZM5G804323 psbB, ZemaCp048 GRMZM2G113349 GRMZM5G897592 petD, ZemaCp053 psbH, ZemaCp051 petA, ZemaCp036 atpB, ZemaCp031 psbE, ZemaCp040 GRMZM2G176840 pco072676(750), FDX6, GRMZM2G106190 GRMZM2G113349 GRMZM2G436986 GRMZM2G059191 psaA, ZemaC…
Phenylpropanoid biosynthesis	133		Phenylpropanoid biosynthesis	133	242	0.000274554	0.0135389	Zm00001d037359 Zm00001d002899 Zm00001d002898 Zm00001d037849 Zm00001d027411 Zm00001d029274 Zm00001d047064 Zm00001d038555 Zm00001d002897 Zm00001d035336 Zm00001d010064 Zm00001d002004 Zm00001d027711 Zm00001d027710 Zm00001d018618 Zm00001d029747 Zm00001d040702 Zm00001d040705 Zm00001d032152 Zm00001d008300 Zm00001d042022 Zm00001d046210 Zm00001d017696 Zm00001d018619 Zm00001d020808 Zm00001d014123 Zm00001d0…	zma:100191217 zma:100279351 zma:100194034 zma:100272756 zma:100191905 zma:542571 zma:103640218 zma:100274274 zma:542464 zma:103629160 zma:103637120 zma:100274427 zma:100191850 zma:103631733 zma:100281280 zma:100216632 zma:542029 zma:100273283 zma:542463 zma:100282124 zma:100192761 zma:100501315 zma:100216881 zma:103631868 zma:100282411 zma:103626198 zma:100285877 zma:100382033 zma:100273589 zma:1…	100191217 100279351 100194034 100272756 100191905 542571 103640218 100274274 542464 103629160 103637120 100274427 100191850 103631733 100281280 100216632 542029 100273283 542463 100282124 100192761 100501315 100216881 103631868 100282411 103626198 100285877 100382033 100273589 100284887 103633187 100286338 103651385 100285457 100279982 100285056 100281042 542258 100192939 541674 100384441 542414 …	TIDP3136, GRMZM2G095404 GRMZM2G108153 GRMZM2G108207 GRMZM2G147245 GRMZM2G341934 pox2, GRMZM2G040638, PER2, PRX2, pmPOX2 GRMZM2G116452 GRMZM2G140817 ap1, GRMZM2G108219, Px11 GRMZM2G081928 pco083783 GRMZM2G122787 GRMZM2G122816 umc1244, GRMZM2G085198 pox1, PER1, PRX1, pmPOX1 GRMZM2G107228 cncr1, CCR, GRMZM2G131205 GRMZM2G089982 TIDP3705 GRMZM2G376416 GRMZM2G138450 pco123006 GRMZM2G134947 pco080795, …
Biosynthesis of secondary metabolites	648		Biosynthesis of secondary metabolites	648	1481	0.000322355	0.0135389	Zm00001d002899 Zm00001d002898 Zm00001d041082 Zm00001d027656 Zm00001d002897 Zm00001d010064 Zm00001d039422 Zm00001d039131 Zm00001d045261 Zm00001d008569 Zm00001d028325 Zm00001d042842 Zm00001d027558 Zm00001d014944 Zm00001d042685 Zm00001d034128 Zm00001d015378 Zm00001d035156 Zm00001d054008 Zm00001d018034 Zm00001d004125 Zm00001d040702 Zm00001d040705 Zm00001d017258 Zm00001d037182 Zm00001d028855 Zm00001d0…	zma:100279351 zma:100194034 zma:100279558 zma:103631716 zma:542464 zma:103637120 zma:100501865 zma:542737 zma:541669 zma:100282855 zma:100217085 zma:100285259 zma:100304277 zma:100282503 zma:100276531 zma:100285899 zma:100273340 zma:542718 zma:100384063 zma:100283007 zma:542319 zma:542029 zma:100273283 zma:100284286 zma:732731 zma:100283445 zma:103629163 zma:100383765 zma:100191234 zma:100382033 …	100279351 100194034 100279558 103631716 542464 103637120 100501865 542737 541669 100282855 100217085 100285259 100304277 100282503 100276531 100285899 100273340 542718 100384063 100283007 542319 542029 100273283 100284286 732731 100283445 103629163 100383765 100191234 100382033 100284317 100274472 103646525 100282201 100194305 100280335 103633187 103632535 100382674 100191838 100284931 100281052 …	GRMZM2G108153 GRMZM2G108207 GRMZM2G339563 ap1, GRMZM2G108219, Px11 GRMZM2G133121 AGP2, GRMZM2G027955 ss1, GRMZM2G129451 GRMZM2G167085 GRMZM2G107199 gpm274, GRMZM2G085577 IDP553, GRMZM2G176397 cl2158_1, GRMZM2G128929 GRMZM2G400604 GRMZM2G176085 GRMZM2G010321 GAPC2, GRMZM2G180625, gpc2 pco077228, GRMZM2G105644 ACC1, GRMZM5G858094 pox1, PER1, PRX1, pmPOX1 GRMZM2G107228 opr3, GRMZM2G156712 GRMZM2G010…
Metabolic pathways	1067		Metabolic pathways	1067	2609	0.00450258	0.141831	Zm00001d002899 Zm00001d002898 Zm00001d037359 Zm00001d007687 Zm00001d042768 Zm00001d040220 Zm00001d046112 Zm00001d010064 Zm00001d039422 Zm00001d039131 Zm00001d015570 Zm00001d008569 Zm00001d022192 Zm00001d031899 Zm00001d028325 Zm00001d033619 Zm00001d032311 Zm00001d027558 Zm00001d014944 Zm00001d038794 Zm00001d043328 Zm00001d042685 Zm00001d020139 Zm00001d015378 Zm00001d012407 Zm00001d034129 GRMZM5G81…	zma:100279351 zma:100194034 zma:100191217 zma:100273624 zma:107457591 zma:100194257 zma:732743 zma:103637120 zma:100501865 zma:542737 zma:103626734 zma:100282855 zma:677667 zma:542374 zma:100217085 zma:542334 zma:103643324 zma:100304277 zma:100282503 zma:103630641 zma:100384288 zma:100276531 zma:100282194 zma:100273340 zma:100280823 zma:100382459 zma:1466379 zma:100283007 zma:542319 zma:542029 zm…	100279351 100194034 100191217 100273624 107457591 100194257 732743 103637120 100501865 542737 103626734 100282855 677667 542374 100217085 542334 103643324 100304277 100282503 103630641 100384288 100276531 100282194 100273340 100280823 100382459 1466379 100283007 542319 542029 100273283 100284286 100281709 100283489 103641727 100283445 542464 100191620 100280704 103641723 100191862 100278194 54210…	GRMZM2G108153 GRMZM2G108207 TIDP3136, GRMZM2G095404 IDP610, GRMZM2G152258 IDP664 spesyn, GRMZM2G047867, spds2 GRMZM2G133121 AGP2, GRMZM2G027955 GRMZM2G462613 GRMZM2G167085 si603015d01b, GRMZM5G840145, SRA mdh6, GRMZM2G129513 GRMZM2G107199 adss1, GRMZM2G119852, PURA GRMZM2G008226 IDP553, GRMZM2G176397 cl2158_1, GRMZM2G128929 GRMZM2G043943 LIP1P-2, GRMZM2G101698 GRMZM2G400604 pco084690, GRMZM2G3223…
Porphyrin and chlorophyll metabolism	41		Porphyrin and chlorophyll metabolism	41	64	0.00568541	0.143272	Zm00001d027416 Zm00001d046493 Zm00001d003214 Zm00001d031309 Zm00001d031308 Zm00001d027656 Zm00001d036894 Zm00001d036046 Zm00001d026603 Zm00001d030549 Zm00001d013013 Zm00001d026405 Zm00001d013937 Zm00001d001820 Zm00001d048372 Zm00001d053901 Zm00001d029150 Zm00001d031860 Zm00001d053807 Zm00001d014715 Zm00001d042026 Zm00001d011876 Zm00001d018034 Zm00001d011387 Zm00001d011386 Zm00001d008203 Zm00001d0…	zma:100285830 zma:100193737 zma:541866 zma:100192499 zma:100192499 zma:103631716 zma:100526754 zma:100273426 zma:100382191 zma:100272914 zma:103625782 zma:100191548 zma:100381341 zma:100194154 zma:100281059 zma:100383787 zma:100281890 zma:100192754 zma:100284619 zma:100284052 zma:100274228 zma:542164 zma:100283007 zma:100383208 zma:100192850 zma:542554 zma:542606 zma:103634652 zma:100192907 zma:1…	100285830 100193737 541866 100192499 100192499 103631716 100526754 100273426 100382191 100272914 103625782 100191548 100381341 100194154 100281059 100383787 100281890 100192754 100284619 100284052 100274228 542164 100283007 100383208 100192850 542554 542606 103634652 100192907 100500945 100191436 100193482 103634652 100284976 100191140 100383787 100193466 100191887 732841 100281115 100274372	GRMZM2G105436 HO1, GRMZM2G101004 prpo2, GRMZM2G364901 GRMZM2G339563 HO-1 GRMZM2G161673 GRMZM2G323024 GRMZM2G043453 GRMZM2G177412, gtr1 GRMZM2G073351, por pcr1, GRMZM2G084958 GRMZM2G057491 DVR, GRMZM2G063048 GRMZM2G056686 pco070684 pco065721, GRMZM2G397247 elm1, GRMZM5G861678, Hy2 pco077228, GRMZM2G105644 GRMZM2G024738 prpo1, GRMZM2G039396, PPO les22, GRMZM2G044074 GRMZM2G081462 GRMZM2G093197 GRMZ…
Phenylalanine metabolism	32		Phenylalanine metabolism	32	48	0.00906524	0.19037	Zm00001d003015 Zm00001d003016 Zm00001d037849 Zm00001d043382 Zm00001d033286 Zm00001d019365 Zm00001d004288 Zm00001d003309 Zm00001d046915 Zm00001d027711 Zm00001d016471 Zm00001d042685 Zm00001d017279 Zm00001d053619 Zm00001d017275 Zm00001d017274 Zm00001d017276 Zm00001d015459 Zm00001d050224 Zm00001d014659 Zm00001d005998 Zm00001d052842 Zm00001d010190 Zm00001d052321 Zm00001d016441 Zm00001d009858 Zm00001d0…	zma:100281042 zma:542258 zma:100272756 zma:100273311 zma:100285115 zma:103633803 zma:103646736 zma:100383438 zma:542166 zma:100191850 zma:100284998 zma:100276531 zma:100381820 zma:103655990 zma:100273579 zma:542258 zma:103627433 zma:542166 zma:103653401 zma:100284546 zma:100286151 zma:100286151 zma:100274472 zma:100284350 zma:100191283 zma:100272801 zma:103646736 zma:100282625 zma:100285115 zma:1…	100281042 542258 100272756 100273311 100285115 103633803 103646736 100383438 542166 100191850 100284998 100276531 100381820 103655990 100273579 542258 103627433 542166 103653401 100284546 100286151 100286151 100274472 100284350 100191283 100272801 103646736 100282625 100285115 100280065 542258 100280065	GRMZM2G118345 pal3, GRMZM2G074604, PAL1 GRMZM2G147245 pco118382, GRMZM2G094712 GRMZM2G374213 GRMZM2G050937 pco118120, GRMZM2G147884 pco063262, 4CL, GRMZM2G075333 GRMZM2G122787 GRMZM2G028677 GRMZM2G400604 GRMZM2G170692 GRMZM2G029048 pal3, GRMZM2G074604, PAL1 GRMZM2G334660 pco063262, 4CL, GRMZM2G075333 GRMZM2G174732 GRMZM2G048672, mif GRMZM2G033952 GRMZM2G033952 pco075539 cl405_1, GRMZM2G088847, mi…
Photosynthesis - antenna proteins	21		Photosynthesis - antenna proteins	21	31	0.02756	0.49608	Zm00001d050403 Zm00001d021763 Zm00001d009589 Zm00001d046786 Zm00001d018157 Zm00001d001857 Zm00001d007267 Zm00001d015385 Zm00001d006663 Zm00001d048998 Zm00001d020002 Zm00001d011285 Zm00001d021784 Zm00001d039040 Zm00001d026599 Zm00001d021906 Zm00001d032051 Zm00001d005814 Zm00001d006587 Zm00001d032197 Zm00001d021435	zma:100280410 zma:542478 zma:542530 zma:100282214 zma:100281795 zma:100273752 zma:542716 zma:100281791 zma:100191715 zma:542320 zma:100274085 zma:100274453 zma:100284154 zma:100193833 zma:542321 zma:100282512 zma:100273752 zma:100273427 zma:100216729 zma:100284001 zma:100281248	100280410 542478 542530 100282214 100281795 100273752 542716 100281791 100191715 542320 100274085 100274453 100284154 100193833 542321 100282512 100273752 100273427 100216729 100284001 100281248	psb29, GRMZM2G033885, cp29 lhcb3, GRMZM2G155216, cab-m9 GRMZM2G010884 csu1028(lhcb), GRMZM2G103101 GRMZM2G039996 lhcb5, GRMZM2G149428, Lhcb5-1 GRMZM2G092311 GRMZM2G038519 Lhcb5-2 si486069e02, GRMZM2G131489 GRMZM2G057281 lhcb7, Cab-m7, GRMZM2G402936 lhcb6, CP24, GRMZM2G092427, Lhcb6-1 GRMZM2G072280 GRMZM2G039996 GRMZM2G117412 gpm571, GRMZM2G153184 CAB1, LHCP
Linoleic acid metabolism	12		Linoleic acid metabolism	12	16	0.0546822	0.797778	Zm00001d015852 Zm00001d033624 Zm00001d002000 Zm00001d041204 Zm00001d013493 Zm00001d033623 Zm00001d042541 Zm00001d042540 Zm00001d027893 Zm00001d013014 Zm00001d033683 Zm00001d053675	zma:100037810 zma:100037803 zma:100037805 zma:100037829 zma:100037804 zma:542495 zma:541856 zma:100037802 zma:100037806 zma:100382466 zma:100191566 zma:100037809	100037810 100037803 100037805 100037829 100037804 542495 541856 100037802 100037806 100382466 100191566 100037809	lox11, GRMZM2G009479 LOX4, GRMZM2G109056 lox6, GRMZM2G040095 LOX12, GRMZM2G106748 LOX5, GRMZM2G102760 LOX, GRMZM2G156861 LOX2 lox9, GRMZM2G017616 AY110479 lox10
Carotenoid biosynthesis	27		Carotenoid biosynthesis	27	48	0.0608919	0.797778	Zm00001d020717 Zm00001d043442 Zm00001d036345 Zm00001d017766 Zm00001d017762 Zm00001d033377 Zm00001d003513 Zm00001d003512 Zm00001d015651 Zm00001d052932 Zm00001d019124 Zm00001d004021 Zm00001d012394 Zm00001d005889 Zm00001d002736 Zm00001d009286 Zm00001d018488 Zm00001d007502 Zm00001d051556 Zm00001d051554 Zm00001d007549 Zm00001d007560 Zm00001d027936 Zm00001d023655 Zm00001d025545 Zm00001d021410 Zm00001d0…	zma:100191697 zma:100502522 zma:100136882 zma:103627610 zma:100383693 zma:100383768 zma:100285076 zma:100285076 zma:100383002 zma:100281747 zma:542604 zma:100281366 zma:542686 zma:103647484 zma:100502521 zma:100383768 zma:103627895 zma:100281663 zma:103627610 zma:100383693 zma:103648116 zma:100277925 zma:542329 zma:100194203 zma:100285076 zma:100136882 zma:103637620	100191697 100502522 100136882 103627610 100383693 100383768 100285076 100285076 100383002 100281747 542604 100281366 542686 103647484 100502521 100383768 103627895 100281663 103627610 100383693 103648116 100277925 542329 100194203 100285076 100136882 103637620	IDP1977, GRMZM2G065928 CCD8, GRMZM2G446858 y1, GRMZM2G300348, PSY1, pb1 GRMZM2G150363 GRMZM2G179147 GRMZM2G127139 GRMZM2G127139 zds1, GRMZM2G454952 GRMZM2G027219 psy2, GRMZM2G149317 GRMZM2G002142 CCD7, GRMZM2G158657 GRMZM5G837869 CRTISO2, GRMZM2G106531 GRMZM2G150363 GRMZM2G179147 GRMZM2G116461 pds1, GRMZM2G410515, Pds GRMZM2G011746 GRMZM2G127139 y1, GRMZM2G300348, PSY1, pb1 GRMZM2G143202
Circadian rhythm - plant	36		Circadian rhythm - plant	36	69	0.0680014	0.797778	Zm00001d021557 Zm00001d004875 Zm00001d021135 Zm00001d013402 Zm00001d039072 Zm00001d052673 Zm00001d009617 Zm00001d029978 Zm00001d006116 Zm00001d003477 Zm00001d053091 Zm00001d004630 Zm00001d039589 Zm00001d015290 Zm00001d050850 Zm00001d006440 Zm00001d021291 Zm00001d001004 Zm00001d052138 Zm00001d047761 Zm00001d007403 Zm00001d047632 Zm00001d008205 Zm00001d007445 Zm00001d038725 Zm00001d006212 Zm00001d0…	zma:541824 zma:100272683 zma:103633010 zma:103643916 zma:103635349 zma:100274415 zma:103635349 zma:542628 zma:100127527 zma:100384475 zma:100279726 zma:100127526 zma:100272803 zma:103626626 zma:100384475 zma:100283448 zma:100273598 zma:100127539 zma:100286122 zma:100280240 zma:100282642 zma:100381811 zma:100279991 zma:100279726 zma:100127518 zma:100285170 zma:103643916 zma:100286122 zma:100383534…	541824 100272683 103633010 103643916 103635349 100274415 103635349 542628 100127527 100384475 100279726 100127526 100272803 103626626 100384475 100283448 100273598 100127539 100286122 100280240 100282642 100381811 100279991 100279726 100127518 100285170 103643916 100286122 100383534 100192868 100272683 100147733 103629610 100382453 100383702 100127539	pco084367(373), GRMZM2G161611 TIDP3698, GRMZM2G135446, PRR59 GRMZM2G440005, ZCN24 PhyA1, GRMZM2G157727 GRMZM2G020291 c2, GRMZM2G422750, colorless2 GRMZM2G020291 pco146174(472) ZCN18, GRMZM2G158809 siu50817b, GRMZM2G024739 GRMZM2G106363 ZCN17, GRMZM2G075215 gigz1b GRMZM2G147800 siu50817b, GRMZM2G024739 GRMZM2G171613 GRMZM2G179024 gpm849, ZCN26 GRMZM2G104920 GRMZM2G095727 GRMZM2G151227 GRMZM2G09217…
Starch and sucrose metabolism	112		Starch and sucrose metabolism	112	251	0.0696473	0.797778	Zm00001d016708 Zm00001d039131 Zm00001d015570 Zm00001d042514 Zm00001d042353 Zm00001d032311 Zm00001d028243 Zm00001d038794 Zm00001d016531 Zm00001d022206 Zm00001d047273 Zm00001d047253 Zm00001d046210 Zm00001d036608 Zm00001d052060 Zm00001d035037 Zm00001d029371 Zm00001d025355 Zm00001d025354 Zm00001d021026 Zm00001d028653 Zm00001d013319 Zm00001d045261 Zm00001d003817 Zm00001d028199 Zm00001d005890 Zm00001d0…	zma:542314 zma:542737 zma:103626734 zma:100285419 zma:103650849 zma:103643324 zma:100191471 zma:103630641 zma:100382408 zma:100381522 zma:100285419 zma:542247 zma:100501315 zma:103629642 zma:103654185 zma:542108 zma:100273093 zma:541678 zma:100285169 zma:100280936 zma:100191862 zma:100285405 zma:541669 zma:542342 zma:100192939 zma:542522 zma:542414 zma:100272656 zma:541656 zma:100279278 zma:10028…	542314 542737 103626734 100285419 103650849 103643324 100191471 103630641 100382408 100381522 100285419 542247 100501315 103629642 103654185 542108 100273093 541678 100285169 100280936 100191862 100285405 541669 542342 100192939 542522 542414 100272656 541656 100279278 100281481 677667 103636651 732774 542313 100283908 100285259 100191846 103633411 542761 103640332 103630226 100501516 103651489 1…	incw1, GRMZM2G139300 AGP2, GRMZM2G027955 GRMZM2G462613 cl9963_1, GRMZM2G078890 GRMZM2G008226 GRMZM2G111324 GRMZM2G043943 pco119626, GRMZM2G130046 pco094517, GRMZM2G013811 cl9963_1, GRMZM2G078890 sus1, GRMZM2G152908, ss2 GRMZM2G376416 GRMZM2G428518 frk2, GRMZM2G051677 incw3, GRMZM2G123633 GRMZM2G095725 GRMZM2G429118 GRMZM2G044027 GRMZM2G147849 ss1, GRMZM2G129451 GRMZM2G073054, Sbe2a, sbe3 GRMZM2G0…
Ubiquinone and other terpenoid-quinone biosynthesis	29		Ubiquinone and other terpenoid-quinone biosynthesis	29	55	0.0869713	0.849341	Zm00001d043249 Zm00001d037849 Zm00001d046558 Zm00001d019365 Zm00001d014157 Zm00001d046915 Zm00001d011773 Zm00001d027711 Zm00001d016471 Zm00001d017746 Zm00001d005251 Zm00001d015459 Zm00001d037542 Zm00001d039274 Zm00001d012607 Zm00001d050224 Zm00001d046909 Zm00001d010698 Zm00001d010699 Zm00001d016441 Zm00001d009858 Zm00001d052392 Zm00001d043970 Zm00001d027999 Zm00001d006657 Zm00001d020220 Zm00001d0…	zma:100283201 zma:100272756 zma:103638712 zma:103633803 zma:100280914 zma:542166 zma:103636258 zma:100191850 zma:100284998 zma:732837 zma:100279567 zma:542166 zma:103630047 zma:100280065 zma:100285365 zma:103653401 zma:732789 zma:100285601 zma:100285601 zma:100191283 zma:100272801 zma:100194079 zma:100304279 zma:100285808 zma:100280305 zma:100275708 zma:100384459 zma:100284931 zma:100280065	100283201 100272756 103638712 103633803 100280914 542166 103636258 100191850 100284998 732837 100279567 542166 103630047 100280065 100285365 103653401 732789 100285601 100285601 100191283 100272801 100194079 100304279 100285808 100280305 100275708 100384459 100284931 100280065	csu690, GRMZM2G138800 GRMZM2G147245 GRMZM2G173358 GRMZM2G374213 GRMZM2G042136 pco063262, 4CL, GRMZM2G075333 GRMZM2G438673 GRMZM2G122787 GRMZM2G028677 cl364_1, GRMZM2G035213, TMT GRMZM2G165133 pco063262, 4CL, GRMZM2G075333 GRMZM2G174621 gpm212c gpm345, GRMZM2G159643 GRMZM2G174732 VTE2-1, GRMZM2G048472 IDP2456, GRMZM2G082792 IDP2456, GRMZM2G082792 pco115235a GRMZM2G139874 GRMZM2G060156 TIDP3406, GR…
Sesquiterpenoid and triterpenoid biosynthesis	9		Sesquiterpenoid and triterpenoid biosynthesis	9	12	0.0905491	0.849341	Zm00001d034516 Zm00001d024208 Zm00001d024207 Zm00001d024210 Zm00001d014695 Zm00001d028299 Zm00001d052971 Zm00001d002351 Zm00001d024486	zma:100191601 zma:103641097 zma:542688 zma:103641097 zma:103626416 zma:100274333 zma:103654534 zma:541974 zma:732751	100191601 103641097 542688 103641097 103626416 100274333 103654534 541974 732751	GRMZM2G029396 Umi3, tps11 tps6, GRMZM2G127087 Umi3, tps11 GRMZM2G156398, GRMZM2G305148 GRMZM2G091456 tps1, GRMZM2G049538, KS, eks1 tps10, GRMZM2G179092
Cutin, suberine and wax biosynthesis	18		Cutin, suberine and wax biosynthesis	18	31	0.0943712	0.849341	Zm00001d014055 Zm00001d042814 Zm00001d037343 Zm00001d002687 Zm00001d017952 Zm00001d028252 Zm00001d012326 Zm00001d017953 Zm00001d000107 Zm00001d040188 Zm00001d017528 Zm00001d020238 Zm00001d032284 Zm00001d042723 Zm00001d025833 Zm00001d012274 Zm00001d030494 Zm00001d049950	zma:100280261 zma:100192044 zma:100217206 zma:100192011 zma:100283710 zma:100285543 zma:100273463 zma:100282316 zma:100285021 zma:100284056 zma:100192011 zma:100192014 zma:100281523 zma:100284056 zma:100216957 zma:100284056 zma:100274114 zma:100272790	100280261 100192044 100217206 100192011 100283710 100285543 100273463 100282316 100285021 100284056 100192011 100192014 100281523 100284056 100216957 100284056 100274114 100272790	cl3929_1, CER1, GRMZM2G066578 cl308_1 GRMZM2G164308 GRMZM2G020500 GRMZM2G090505 GRMZM2G342685 GRMZM2G090609 GRMZM2G034360 GRMZM2G020500 GRMZM2G081841 GRMZM2G141214 GRMZM2G034360 IDP1639, GRMZM2G139797 GRMZM2G034360 GRMZM2G417382 msh1, GRMZM2G036217
Nitrogen metabolism	26		Nitrogen metabolism	26	50	0.110459	0.927855	Zm00001d011610 Zm00001d005920 Zm00001d054057 Zm00001d052164 Zm00001d017352 Zm00001d009860 Zm00001d028260 Zm00001d043348 Zm00001d044095 Zm00001d044096 Zm00001d044099 Zm00001d049995 Zm00001d043845 Zm00001d031769 Zm00001d052139 Zm00001d048050 Zm00001d004909 Zm00001d017958 Zm00001d054060 Zm00001d011454 Zm00001d018206 Zm00001d034420 Zm00001d051804 Zm00001d017025 Zm00001d018161 Zm00001d022388	zma:103636185 zma:100283312 zma:542092 zma:542264 zma:542573 zma:100383210 zma:542520 zma:100274074 zma:100274597 zma:100285064 zma:100382491 zma:542278 zma:103651348 zma:103643134 zma:103654219 zma:542215 zma:100272575 zma:542214 zma:101027089 zma:100382491 zma:100383210 zma:100856888 zma:542401 zma:542278 zma:103627781 zma:542710	103636185 100283312 542092 542264 542573 100383210 542520 100274074 100274597 100285064 100382491 542278 103651348 103643134 103654219 542215 100272575 542214 101027089 100382491 100383210 100856888 542401 542278 103627781 542710	GRMZM2G077054 GRMZM2G145101 nrt2, membrane, nrt2.1 gpm108b, GRMZM2G079381, NIR NIT1, GRMZM2G178517, ZmNIT1 DIA1, GRMZM5G878558, NR, nar GLN6, GS1-1, GS122 GRMZM2G424857 GRMZM2G348512 csu869(cah) umc2175 NAR1S, NR GRMZM2G076723 gln3, CL1911_3, CL1911_3_ov, CL1911_3b, GRMZM2G046601, GS1-5, GS117, GS1752 pco087467a, GRMZM2G024495 gln4, gln1-3, gs1-3 GRMZM2G010251 umc2175 DIA1, GRMZM5G878558, NR, nar…
Nicotinate and nicotinamide metabolism	13		Nicotinate and nicotinamide metabolism	13	24	0.184912	0.999997	Zm00001d003674 Zm00001d034777 Zm00001d004716 Zm00001d045394 Zm00001d053076 Zm00001d025412 Zm00001d042052 Zm00001d013664 Zm00001d006311 Zm00001d034725 Zm00001d051927 Zm00001d040599 Zm00001d043686	zma:103646450 zma:100274271 zma:103646963 zma:100283048 zma:103654587 zma:103646450 zma:100285591 zma:100284093 zma:100382929 zma:100193647 zma:100284011 zma:103650090 zma:100280755	103646450 100274271 103646963 100283048 103654587 103646450 100285591 100284093 100382929 100193647 100284011 103650090 100280755	GRMZM2G177561, GRMZM2G391511 pco103153 GRMZM2G046498 GRMZM2G177561, GRMZM2G391511 pco072227, GRMZM2G157310 GRMZM5G887647 GRMZM2G037379
Carbon fixation in photosynthetic organisms	50		Carbon fixation in photosynthetic organisms	50	113	0.185453	0.999997	Zm00001d012103 Zm00001d014030 Zm00001d043382 Zm00001d028471 Zm00001d021310 Zm00001d002454 Zm00001d053015 Zm00001d028562 Zm00001d042727 Zm00001d037962 Zm00001d037961 Zm00001d013135 Zm00001d000164 Zm00001d012407 Zm00001d042840 Zm00001d008491 Zm00001d027841 Zm00001d038579 Zm00001d035156 Zm00001d049641 GRMZM5G815453 Zm00001d034241 Zm00001d022229 Zm00001d053453 Zm00001d016166 Zm00001d010321 Zm00001d00…	zma:100272913 zma:100280767 zma:100273311 zma:541622 zma:100191222 zma:100281866 zma:100272845 zma:100284339 zma:100273700 zma:542331 zma:542331 zma:100285298 zma:100279820 zma:100280823 zma:100282017 zma:100502020 zma:100274365 zma:100281237 zma:542718 zma:542367 zma:845212 zma:100282134 zma:107305678 zma:542479 zma:542479 zma:103635678 zma:542233 zma:100284771 zma:103641727 zma:103635817 zma:10…	100272913 100280767 100273311 541622 100191222 100281866 100272845 100284339 100273700 542331 542331 100285298 100279820 100280823 100282017 100502020 100274365 100281237 542718 542367 845212 100282134 107305678 542479 542479 103635678 542233 100284771 103641727 103635817 103641723 542374 542393 542290 542393 100282849 103651459 100284598 100279748 100193705 100282845 542368 100272481 100282981 1…	pco118382, GRMZM2G094712 GRMZM2G001696 GRMZM5G852968 si707035f08, GRMZM2G463280 AY110170, GRMZM2G155253 pco073762 me2, GRMZM2G122479 me2, GRMZM2G122479 GRMZM5G874903 GRMZM2G146206 shbp1 GRMZM2G069195 GRMZM2G026807 GRMZM2G089136 GAPC2, GRMZM2G180625, gpc2 GAPC, GAPC1, GPC1 rbcL, ZemaCp032 GRMZM2G072744 pep7, Ppc1C pep7, Ppc1C CYPPDKZM2, GRMZM2G097457, PPDK2, Zm.19608 me3, NADP-ME pco087551, GRMZM2…
ABC transporters	17		ABC transporters	17	34	0.204918	0.999997	Zm00001d037393 Zm00001d043599 Zm00001d028671 Zm00001d019627 Zm00001d029034 Zm00001d025590 Zm00001d008178 Zm00001d014540 Zm00001d002503 Zm00001d025703 Zm00001d025043 Zm00001d016794 Zm00001d043766 Zm00001d051514 Zm00001d002119 Zm00001d026426 Zm00001d053706	zma:103645864 zma:103654853 zma:103644583 zma:103632317 zma:103634613 zma:100383541 zma:103650065 zma:103637544 zma:103646012 zma:103641772 zma:100381832 zma:103627277 zma:103651302 zma:103642112 zma:103645864 zma:103642112 zma:103654853	103645864 103654853 103644583 103632317 103634613 100383541 103650065 103637544 103646012 103641772 100381832 103627277 103651302 103642112 103645864 103642112 103654853	GRMZM2G072850 GRMZM2G401769 GRMZM2G077361 GRMZM2G032936, GRMZM2G317033 GRMZM2G032218 GRMZM2G111462 GRMZM5G843192 GRMZM2G085236 GRMZM2G072850 GRMZM2G085236
Alanine, aspartate and glutamate metabolism	36		Alanine, aspartate and glutamate metabolism	36	80	0.207797	0.999997	Zm00001d051586 Zm00001d031349 Zm00001d043382 Zm00001d048050 Zm00001d026293 Zm00001d047603 Zm00001d044135 Zm00001d031364 Zm00001d033619 Zm00001d028260 Zm00001d047981 Zm00001d029083 Zm00001d003531 Zm00001d002326 Zm00001d011192 Zm00001d031749 Zm00001d043845 Zm00001d011610 Zm00001d042673 Zm00001d031379 Zm00001d017790 Zm00001d044250 Zm00001d017958 Zm00001d030557 Zm00001d038453 Zm00001d014258 Zm00001d0…	zma:100193467 zma:100281949 zma:100273311 zma:542215 zma:100286148 zma:100217081 zma:103651459 zma:103645124 zma:542334 zma:542520 zma:100381655 zma:100501001 zma:100284551 zma:103645944 zma:103636016 zma:100501579 zma:103651348 zma:103636185 zma:100281060 zma:100281949 zma:100273931 zma:103651512 zma:542214 zma:100193705 zma:100384690 zma:100282849 zma:103645133 zma:100856888 zma:101027102 zma:1…	100193467 100281949 100273311 542215 100286148 100217081 103651459 103645124 542334 542520 100381655 100501001 100284551 103645944 103636016 100501579 103651348 103636185 100281060 100281949 100273931 103651512 542214 100193705 100384690 100282849 103645133 100856888 101027102 100284047 100280779 542401 100384690 100273302 100282625 100192351	pco072185 pco084394 pco118382, GRMZM2G094712 gln3, CL1911_3, CL1911_3_ov, CL1911_3b, GRMZM2G046601, GS1-5, GS117, GS1752 GRMZM2G108125 GRMZM5G895991 GRMZM2G050481 adss1, GRMZM2G119852, PURA GLN6, GS1-1, GS122 GRMZM2G098875 pco117429, GRMZM2G101069 GRMZM5G817886 GRMZM2G700683 GRMZM2G077054 pco084394 gln4, gln1-3, gs1-3 GRMZM5G828630 GRMZM2G107739 uaz158(alt), GRMZM2G088064 GRMZM2G359559 GRMZM2G128…
Tyrosine metabolism	22		Tyrosine metabolism	22	46	0.207911	0.999997	Zm00001d033931 Zm00001d043382 Zm00001d030347 Zm00001d043226 Zm00001d052321 Zm00001d027947 Zm00001d027949 Zm00001d018468 Zm00001d042685 Zm00001d034739 Zm00001d014659 Zm00001d046748 Zm00001d010190 Zm00001d033555 Zm00001d003309 Zm00001d045610 Zm00001d016441 Zm00001d027996 Zm00001d000001 Zm00001d019365 Zm00001d024665 Zm00001d018386	zma:542363 zma:100273311 zma:100272357 zma:103651121 zma:100284350 zma:103631817 zma:103631817 zma:542459 zma:100276531 zma:100283765 zma:100284546 zma:100281477 zma:100274472 zma:100272625 zma:100383438 zma:100192757 zma:100191283 zma:100273217 zma:103641120 zma:103633803 zma:100383025 zma:100282625	542363 100273311 100272357 103651121 100284350 103631817 103631817 542459 100276531 100283765 100284546 100281477 100274472 100272625 100383438 100192757 100191283 100273217 103641120 103633803 100383025 100282625	adh1, Adh1-1F, Adh1-1S, GRMZM2G442658 pco118382, GRMZM2G094712 GRMZM2G152981 cl405_1, GRMZM2G088847, mif GRMZM2G056469 GRMZM2G056469 fdh1, GRMZM5G824600, fdh GRMZM2G400604 pco067797, GRMZM2G156516 GRMZM2G048672, mif GRMZM2G108103 pco075539 TIDP3450, GRMZM2G448446 pco118120, GRMZM2G147884 IDP248, GRMZM2G154093 pco115235a pco147721a GRMZM5G851266 GRMZM2G374213 GRMZM5G836910
			Flavonoid biosynthesis	21	44	0.216976	0.999997	Zm00001d047425 Zm00001d047424 Zm00001d001960 Zm00001d037849 Zm00001d039956 Zm00001d007403 Zm00001d016471 Zm00001d037073 Zm00001d044122 Zm00001d009858 Zm00001d052673 Zm00001d026370 Zm00001d038555 Zm00001d005998 Zm00001d005607 Zm00001d010521 Zm00001d040701 Zm00001d039837 Zm00001d052842 Zm00001d018367 Zm00001d017186	zma:103639113 zma:100278079 zma:542712 zma:100272756 zma:100304329 zma:100282642 zma:100284998 zma:100274269 zma:100286107 zma:100272801 zma:100274415 zma:100282500 zma:100274274 zma:100286151 zma:100304329 zma:100279887 zma:103655843 zma:100279982 zma:100286151 zma:100382972 zma:100194386	103639113 100278079 542712 100272756 100304329 100282642 100284998 100274269 100286107 100272801 100274415 100282500 100274274 100286151 100304329 100279887 103655843 100279982 100286151 100382972 100194386	GRMZM2G119067 fht1, GRMZM2G062396, TIDP2907, f3h, fht, fl3h GRMZM2G147245 GRMZM2G151227 GRMZM2G028677 GRMZM2G127251 pco110172(456), A1, DFR GRMZM2G139874 c2, GRMZM2G422750, colorless2 GRMZM2G097841 GRMZM2G140817 GRMZM2G033952 GRMZM2G160763 pco076728, GRMZM2G156816 GRMZM2G033952 GRMZM2G051005 gpm105, GRMZM2G035584
			Stilbenoid, diarylheptanoid and gingerol biosynthesis	12	23	0.224959	0.999997	Zm00001d037849 Zm00001d039956 Zm00001d016471 Zm00001d037073 Zm00001d009858 Zm00001d038555 Zm00001d005998 Zm00001d005607 Zm00001d017186 Zm00001d039837 Zm00001d052842 Zm00001d018367	zma:100272756 zma:100304329 zma:100284998 zma:100274269 zma:100272801 zma:100274274 zma:100286151 zma:100304329 zma:100194386 zma:100279982 zma:100286151 zma:100382972	100272756 100304329 100284998 100274269 100272801 100274274 100286151 100304329 100194386 100279982 100286151 100382972	GRMZM2G147245 GRMZM2G028677 GRMZM2G127251 GRMZM2G139874 GRMZM2G140817 GRMZM2G033952 gpm105, GRMZM2G035584 pco076728, GRMZM2G156816 GRMZM2G033952 GRMZM2G051005
			C5-Branched dibasic acid metabolism	7	12	0.241975	0.999997	Zm00001d017467 Zm00001d002880 Zm00001d007288 Zm00001d026675 Zm00001d015088 Zm00001d017168 Zm00001d053960	zma:100286245 zma:100284589 zma:100279727 zma:100283376 zma:100284902 zma:100381801 zma:100193712	100286245 100284589 100279727 100283376 100284902 100381801 100193712	GRMZM5G840002 cl362_2b, GRMZM5G803490 GRMZM2G077215 GRMZM2G104613 GRMZM2G370852 GRMZM2G007647 PCO109372, GRMZM2G010044
			Glyoxylate and dicarboxylate metabolism	47	110	0.251186	0.999997	Zm00001d031364 Zm00001d031349 Zm00001d042661 Zm00001d048050 Zm00001d049234 Zm00001d012247 Zm00001d015497 Zm00001d014030 Zm00001d003247 Zm00001d002260 Zm00001d002261 Zm00001d027558 Zm00001d028260 Zm00001d004564 Zm00001d043348 Zm00001d053684 Zm00001d033235 Zm00001d015378 Zm00001d030859 GRMZM5G815453 Zm00001d034241 Zm00001d022229 Zm00001d018810 Zm00001d024952 Zm00001d027511 Zm00001d053800 Zm00001d05…	zma:103645124 zma:100281949 zma:100191532 zma:542215 zma:100192461 zma:100286146 zma:103646899 zma:100280767 zma:542252 zma:100285987 zma:100285987 zma:100304277 zma:542520 zma:103646899 zma:100274074 zma:100194338 zma:103630841 zma:100273340 zma:100192461 zma:845212 zma:100282134 zma:107305678 zma:100279535 zma:100281040 zma:542230 zma:100286311 zma:100282207 zma:100281949 zma:100191272 zma:5422…	103645124 100281949 100191532 542215 100192461 100286146 103646899 100280767 542252 100285987 100285987 100304277 542520 103646899 100274074 100194338 103630841 100273340 100192461 845212 100282134 107305678 100279535 100281040 542230 100286311 100282207 100281949 100191272 542214 100274052 100274017 845212 103645133 100191765 103646852 542401 541947 103638381 100193070 100193709 100282691 100381…	GRMZM2G050481 pco084394 GRMZM2G452630 gln3, CL1911_3, CL1911_3_ov, CL1911_3b, GRMZM2G046601, GS1-5, GS117, GS1752 CL9311_1, GRMZM2G113959, GRMZM2G171116 GRMZM2G467338 mas1, GRMZM2G102183, LIP, MS hao1, GRMZM2G076239 hao1, GRMZM2G076239 IDP553, GRMZM2G176397 GLN6, GS1-1, GS122 GRMZM2G467338 GRMZM2G424857 cl5118_1 GRMZM2G010321 rbcL, ZemaCp032 GRMZM2G072744 go1, GRMZM2G129246 aco2, GRMZM5G858454 ca…
			Benzoxazinoid biosynthesis	6	10	0.253777	0.999997	Zm00001d031209 Zm00001d034461 Zm00001d048703 Zm00001d048705 Zm00001d048709 Zm00001d048634	zma:100274317 zma:100273163 zma:100382554 zma:103652726 zma:542117 zma:541977	100274317 100273163 100382554 103652726 542117 541977	bx9, GRMZM2G161335 csu868(trp) CYP71C1, BX4, GRMZM2G172491 bx1, GRMZM2G085381, trpA bx6
			Zeatin biosynthesis	15	31	0.253841	0.999997	Zm00001d003869 Zm00001d042148 Zm00001d043293 Zm00001d011890 Zm00001d050371 Zm00001d013021 Zm00001d012335 Zm00001d019171 Zm00001d032046 Zm00001d039520 Zm00001d053579 Zm00001d005239 Zm00001d036339 Zm00001d008862 Zm00001d032664	zma:103646537 zma:542507 zma:100526752 zma:542056 zma:100280269 zma:100158226 zma:103636476 zma:100158230 zma:100280446 zma:542585 zma:103654801 zma:103649047 zma:100174970 zma:100526749 zma:100526750	103646537 542507 100526752 542056 100280269 100158226 103636476 100158230 100280446 542585 103654801 103649047 100174970 100526749 100526750	GRMZM2G084462, IPT2 cko2, GRMZM2G050997 CKX4b, GRMZM2G024476 cko3, GRMZM2G167220 GRMZM2G076936 IPT5 CISZOG2, GRMZM2G110511 IPT4, GRMZM2G104559 CKX10, GRMZM2G348452 cko1, cko, ckx1 GRMZM2G018046 IPT, GRMZM2G102915 CKX5, GRMZM2G325612 CKX6, GRMZM2G404443
			Cysteine and methionine metabolism	57	137	0.277385	0.999997	Zm00001d026060 Zm00001d008379 Zm00001d020543 Zm00001d045327 Zm00001d010869 Zm00001d020544 Zm00001d043382 Zm00001d038737 Zm00001d040220 Zm00001d046112 Zm00001d029324 Zm00001d013644 Zm00001d026291 Zm00001d045340 Zm00001d027536 Zm00001d033480 Zm00001d047166 Zm00001d018211 Zm00001d000163 Zm00001d029083 Zm00001d015026 Zm00001d039487 Zm00001d049042 Zm00001d043101 Zm00001d031024 Zm00001d034241 Zm00001d0…	zma:100279981 zma:100280321 zma:103632784 zma:100502310 zma:100278365 zma:100282888 zma:100273311 zma:541958 zma:100194257 zma:732743 zma:541650 zma:541714 zma:541827 zma:103638081 zma:103631673 zma:100286153 zma:541650 zma:100191321 zma:100280566 zma:100501001 zma:100282933 zma:107521951 zma:542191 zma:103651084 zma:100275494 zma:100282134 zma:107305678 zma:100283320 zma:100282503 zma:100193279 …	100279981 100280321 103632784 100502310 100278365 100282888 100273311 541958 100194257 732743 541650 541714 541827 103638081 103631673 100286153 541650 100191321 100280566 100501001 100282933 107521951 542191 103651084 100275494 100282134 107305678 100283320 100282503 100193279 103632028 103632028 100279822 100282908 542026 103644325 542026 100384690 100286299 103641391 100382364 100279553 100282…	acs7, GRMZM5G894619 cys1 GRMZM2G060369 IDP754, GRMZM2G461159 pco118382, GRMZM2G094712 sat1, GRMZM2G069203 IDP664 spesyn, GRMZM2G047867, spds2 cgs1, GRMZM2G075153 TIDP2999, GRMZM2G112149 met2a, GRMZM2G025592, met2 GRMZM2G003289 GRMZM2G048740 TIDP3524, GRMZM2G165747 cgs1, GRMZM2G075153 GRMZM2G052422 GRMZM2G089856 TIDP2941, IDI2, M1Pi, ZmIDI2 pco128327 GRMZM2G072744 GRMZM2G366392 cl2158_1, GRMZM2G12…
			Lysine biosynthesis	13	27	0.279757	0.999997	Zm00001d019988 Zm00001d028855 Zm00001d047935 Zm00001d005535 Zm00001d041575 Zm00001d023429 Zm00001d034851 Zm00001d002602 Zm00001d030677 Zm00001d005818 Zm00001d049956 Zm00001d042264 Zm00001d028810	zma:542708 zma:100283445 zma:100280882 zma:542708 zma:100273435 zma:100273126 zma:103644325 zma:100282239 zma:100191234 zma:100282748 zma:100194039 zma:100279553 zma:100283445	542708 100283445 100280882 542708 100273435 100273126 103644325 100282239 100191234 100282748 100194039 100279553 100283445	akh2, AKHSDH2, GRMZM2G104546 GRMZM2G010328 akh2, AKHSDH2, GRMZM2G104546 GRMZM2G020446 GRMZM2G024686 GRMZM2G556131 pco102509, GRMZM2G130332 GRMZM2G130440 cl754_1a GRMZM2G010328
			Peroxisome	51	122	0.281487	0.999997	Zm00001d031364 Zm00001d031349 Zm00001d035318 Zm00001d052444 Zm00001d019439 Zm00001d027511 Zm00001d000107 Zm00001d013795 Zm00001d009351 Zm00001d028542 Zm00001d002260 Zm00001d002261 Zm00001d008401 Zm00001d045606 Zm00001d024723 Zm00001d024101 Zm00001d054008 Zm00001d018810 Zm00001d029626 Zm00001d023538 Zm00001d033091 Zm00001d049950 Zm00001d010908 Zm00001d018487 Zm00001d031379 Zm00001d049974 Zm00001d0…	zma:103645124 zma:100281949 zma:100274053 zma:100283677 zma:100282854 zma:542230 zma:100285021 zma:100216568 zma:103635236 zma:100285700 zma:100285987 zma:100285987 zma:100285661 zma:100382424 zma:100279270 zma:103642407 zma:100384063 zma:100279535 zma:100384368 zma:103640823 zma:100285035 zma:100272790 zma:100383425 zma:100192501 zma:100281949 zma:103653276 zma:103635090 zma:100283462 zma:100281…	103645124 100281949 100274053 100283677 100282854 542230 100285021 100216568 103635236 100285700 100285987 100285987 100285661 100382424 100279270 103642407 100384063 100279535 100384368 103640823 100285035 100272790 100383425 100192501 100281949 103653276 103635090 100283462 100281538 100282741 541646 100281546 100191657 100281457 100281785 103645133 103654554 100283048 100274012 100194355 10028…	GRMZM2G050481 pco084394 pco068646, GRMZM2G166537 cl173_1a, GRMZM2G095141 GRMZM2G109743 cat2, Cat0, Ct2, GRMZM2G090568, ncr(cat2) GRMZM2G001724 GRMZM2G364369 hao1, GRMZM2G076239 hao1, GRMZM2G076239 GRMZM2G052389 TIDP2980, GRMZM2G101875, gpm13 go1, GRMZM2G129246 GRMZM2G050984 GRMZM2G118286 GRMZM2G011269 msh1, GRMZM2G036217 GRMZM2G013450 GRMZM5G848768 pco084394 GRMZM2G428628 pco143515, GRMZM2G052266…
			Carbon metabolism	148	372	0.283168	0.999997	Zm00001d031364 Zm00001d049234 Zm00001d037962 Zm00001d037961 Zm00001d030859 Zm00001d042840 Zm00001d027558 Zm00001d049649 Zm00001d052289 Zm00001d012407 Zm00001d043086 Zm00001d031809 Zm00001d017258 Zm00001d035136 Zm00001d025599 Zm00001d025593 Zm00001d031899 Zm00001d016166 Zm00001d012702 Zm00001d042184 Zm00001d040446 Zm00001d003429 Zm00001d002454 Zm00001d003252 Zm00001d031403 Zm00001d037693 Zm00001d0…	zma:103645124 zma:100192461 zma:542331 zma:542331 zma:100192461 zma:100282017 zma:100304277 zma:100216648 zma:732791 zma:100280823 zma:100381658 zma:100284555 zma:100284286 zma:100502233 zma:103641727 zma:103641723 zma:542374 zma:542479 zma:542393 zma:541699 zma:542177 zma:542368 zma:100281866 zma:100284317 zma:103645133 zma:100284598 zma:100284817 zma:100274052 zma:103646852 zma:103646525 zma:10…	103645124 100192461 542331 542331 100192461 100282017 100304277 100216648 732791 100280823 100381658 100284555 100284286 100502233 103641727 103641723 542374 542479 542393 541699 542177 542368 100281866 100284317 103645133 100284598 100284817 100274052 103646852 103646525 100282201 100193070 100285995 100285548 100502310 100273311 541958 100191222 103651459 100286146 100280767 100285298 542252 10…	GRMZM2G050481 me2, GRMZM2G122479 me2, GRMZM2G122479 shbp1 IDP553, GRMZM2G176397 csu474(rpS14), GRMZM2G134134 pdh1 GRMZM2G146206 GRMZM2G003385 GRMZM2G141634 GRMZM2G302259 GRMZM2G162845 GRMZM2G039723 mdh6, GRMZM2G129513 pep7, Ppc1C pep4, GRMZM2G473001, pep pdh1 PK gpa1, G3PD, GAPA, GRMZM2G337113 si707035f08, GRMZM2G463280 GRMZM2G130230 GRMZM2G359559 GRMZM5G886257 gpm584, GRMZM2G300801, psat1 pco079…
			Thiamine metabolism	7	13	0.290465	0.999997	Zm00001d033383 Zm00001d044228 Zm00001d027505 Zm00001d020139 Zm00001d011183 Zm00001d019060 Zm00001d038170	zma:100285440 zma:542715 zma:103631588 zma:100282194 zma:542714 zma:606430 zma:606484	100285440 542715 103631588 100282194 542714 606430 606484	cl574_1, GRMZM2G027663 thi2, thi1-2 GRMZM2G089092 pco084690, GRMZM2G322314 thi1, GRMZM2G018375, thi1-1 GRMZM2G493395, dxs2 dxs1, GRMZM2G137151
			Galactose metabolism	34	80	0.301392	0.999997	Zm00001d031300 Zm00001d045326 Zm00001d025355 Zm00001d025586 Zm00001d016934 Zm00001d029341 Zm00001d016708 Zm00001d043563 Zm00001d031303 Zm00001d039685 Zm00001d001944 Zm00001d020093 Zm00001d001941 Zm00001d010796 Zm00001d019163 Zm00001d003434 Zm00001d033746 Zm00001d028931 Zm00001d021421 Zm00001d042066 Zm00001d014947 Zm00001d020094 Zm00001d014674 Zm00001d025943 Zm00001d029151 Zm00001d036608 Zm00001d0…	zma:606431 zma:100285548 zma:541678 zma:100191144 zma:100383712 zma:100283171 zma:542314 zma:100281464 zma:103641497 zma:100281190 zma:103645801 zma:100283489 zma:541679 zma:542510 zma:100281159 zma:100217298 zma:542358 zma:606403 zma:100191846 zma:100217216 zma:542324 zma:100283489 zma:100382378 zma:100383472 zma:100501069 zma:103629642 zma:103651489 zma:100285169 zma:100191564 zma:100857010 zma…	606431 100285548 541678 100191144 100383712 100283171 542314 100281464 103641497 100281190 103645801 100283489 541679 542510 100281159 100217298 542358 606403 100191846 100217216 542324 100283489 100382378 100383472 100501069 103629642 103651489 100285169 100191564 100857010 100280694 103644222 100383472 100191982	GRMZM2G037265 incw3, GRMZM2G123633 GRMZM2G125233 GRMZM2G056629 GRMZM2G100452 incw1, GRMZM2G139300 GRMZM5G879882 GRMZM2G050177 GRMZM2G018692 gpm221a, GRMZM2G138410 gpm837, GRMZM2G119941, incw4 pco074668, GRMZM2G058745 GRMZM2G041356 GRMZM2G023289 GRMZM2G165919 csu815, GRMZM2G032003 GRMZM2G089836, ivr2 gpm221a, GRMZM2G138410 GRMZM2G116586 GRMZM2G394450, invertase1 GRMZM2G428518 GRMZM2G095725 GRMZM2G…
			alpha-Linolenic acid metabolism	24	55	0.305205	0.999997	Zm00001d033931 Zm00001d027519 Zm00001d048021 Zm00001d013014 Zm00001d033683 Zm00001d008401 Zm00001d045606 Zm00001d035854 Zm00001d015852 Zm00001d035767 Zm00001d053675 Zm00001d018487 Zm00001d037182 Zm00001d037939 Zm00001d054067 Zm00001d041204 Zm00001d050107 Zm00001d040842 Zm00001d027893 Zm00001d009182 Zm00001d053586 Zm00001d029594 Zm00001d032049 Zm00001d053308	zma:542363 zma:100274307 zma:542150 zma:100382466 zma:100191566 zma:100285661 zma:100382424 zma:101027254 zma:100037810 zma:100191288 zma:100037809 zma:100192501 zma:732731 zma:103630229 zma:542163 zma:100037829 zma:732734 zma:732733 zma:100037806 zma:100285945 zma:103654805 zma:542151 zma:732830 zma:103654691	542363 100274307 542150 100382466 100191566 100285661 100382424 101027254 100037810 100191288 100037809 100192501 732731 103630229 542163 100037829 732734 732733 100037806 100285945 103654805 542151 732830 103654691	adh1, Adh1-1F, Adh1-1S, GRMZM2G442658 GRMZM2G096020 aos1, GRMZM2G067225, aos AY110479 GRMZM2G052389 GRMZM2G312997 lox11, GRMZM2G009479 lox10 GRMZM5G848768 opr3, GRMZM2G156712 GRMZM2G117357 hpl1, HPL, P450 LOX12, GRMZM2G106748 opr8, GRMZM2G082087 opr6, GRMZM2G068947 lox9, GRMZM2G017616 GRMZM2G132903 aoc1, GRMZM2G077316, ZmAOC, aoc pco088243a, GRMZM2G148281, OPR7
			Glycine, serine and threonine metabolism	46	111	0.3108	0.999997	Zm00001d031364 Zm00001d031349 Zm00001d042661 Zm00001d043086 Zm00001d049234 Zm00001d012518 Zm00001d012247 Zm00001d003309 Zm00001d005818 Zm00001d029083 Zm00001d033235 Zm00001d015378 Zm00001d030859 Zm00001d034452 Zm00001d032114 Zm00001d026472 Zm00001d031809 Zm00001d036496 Zm00001d053800 Zm00001d043780 Zm00001d031379 Zm00001d002711 Zm00001d025862 Zm00001d009134 Zm00001d002613 Zm00001d034851 Zm00001d0…	zma:103645124 zma:100281949 zma:100191532 zma:100381658 zma:100192461 zma:542578 zma:100286146 zma:100383438 zma:100282748 zma:100501001 zma:103630841 zma:100273340 zma:100192461 zma:103644181 zma:100383999 zma:100501398 zma:100284555 zma:778432 zma:100286311 zma:100283397 zma:100281949 zma:100216615 zma:100282861 zma:103635090 zma:100280292 zma:103644325 zma:100281928 zma:100283462 zma:103643901…	103645124 100281949 100191532 100381658 100192461 542578 100286146 100383438 100282748 100501001 103630841 100273340 100192461 103644181 100383999 100501398 100284555 778432 100286311 100283397 100281949 100216615 100282861 103635090 100280292 103644325 100281928 100283462 103643901 103644703 100279553 103645133 100284817 103634611 100274052 103646852 100384690 542708 100216919 541947 541855 1001…	GRMZM2G050481 pco084394 GRMZM2G452630 GRMZM2G003385 pco072546, GRMZM5G833389, phosphoglycerate_mutase CL9311_1, GRMZM2G113959, GRMZM2G171116 pco118120, GRMZM2G147884 GRMZM2G130440 GRMZM2G010321 GRMZM2G015436 GRMZM2G073814 GRMZM2G141634 GRMZM2G156162 GRMZM2G050570 pco084394 GRMZM2G171556 GRMZM2G043887 GRMZM2G428628 GRMZM2G086210 GRMZM2G024686 si707066f01, GRMZM2G098423 pco143515, GRMZM2G052266 GRM…
			Glycosaminoglycan degradation	8	16	0.32084	0.999997	Zm00001d030791 Zm00001d021895 Zm00001d028187 Zm00001d038196 Zm00001d002046 Zm00001d028235 Zm00001d041511 Zm00001d045138	zma:103640342 zma:100280704 zma:100279495 zma:103630365 zma:103639124 zma:100280178 zma:100192026 zma:100285720	103640342 100280704 100279495 103630365 103639124 100280178 100192026 100285720	GRMZM2G480451 GRMZM5G860235 GRMZM2G107815 GRMZM2G121514 GRMZM2G033592 GRMZM2G134251 cl10629_-1b, GRMZM2G098397
			Isoquinoline alkaloid biosynthesis	12	26	0.331043	0.999997	Zm00001d010190 Zm00001d043382 Zm00001d043226 Zm00001d042685 Zm00001d016441 Zm00001d046748 Zm00001d003309 Zm00001d027947 Zm00001d024665 Zm00001d000001 Zm00001d027949 Zm00001d018386	zma:100274472 zma:100273311 zma:103651121 zma:100276531 zma:100191283 zma:100281477 zma:100383438 zma:103631817 zma:100383025 zma:103641120 zma:103631817 zma:100282625	100274472 100273311 103651121 100276531 100191283 100281477 100383438 103631817 100383025 103641120 103631817 100282625	pco075539 pco118382, GRMZM2G094712 GRMZM2G400604 pco115235a GRMZM2G108103 pco118120, GRMZM2G147884 GRMZM2G056469 GRMZM5G851266 GRMZM2G056469 GRMZM5G836910
			Vitamin B6 metabolism	7	14	0.340851	0.999997	Zm00001d043780 Zm00001d013845 Zm00001d007936 Zm00001d030533 Zm00001d018632 Zm00001d053981 Zm00001d027727	zma:100283397 zma:100193172 zma:100280630 zma:100381809 zma:100272732 zma:100280887 zma:100284817	100283397 100193172 100280630 100381809 100272732 100280887 100284817	GRMZM2G050570 magi108573, GRMZM2G022130, TIDP3042 GRMZM5G850015 GRMZM2G061988 GRMZM2G120652 AY109859 gpm584, GRMZM2G300801, psat1
			Other glycan degradation	11	24	0.349211	0.999997	Zm00001d002682 Zm00001d021197 Zm00001d030282 Zm00001d021895 Zm00001d030285 Zm00001d010050 Zm00001d038196 Zm00001d028235 Zm00001d007383 Zm00001d042066 Zm00001d048988	zma:100192871 zma:100285202 zma:103638174 zma:100280704 zma:103638195 zma:103635582 zma:103630365 zma:100280178 zma:542217 zma:100217216 zma:103652830	100192871 100285202 103638174 100280704 103638195 103635582 103630365 100280178 542217 100217216 103652830	GRMZM2G019783 GRMZM2G013255 GRMZM2G038973, GRMZM2G337242 GRMZM5G860235 GRMZM2G015143, GRMZM5G855776 GRMZM2G337616 GRMZM2G121514 GRMZM2G134251 AMA1, GRMZM2G172369
			Glutathione metabolism	56	139	0.349795	0.999997	Zm00001d013693 Zm00001d031494 Zm00001d038192 Zm00001d037337 Zm00001d021470 Zm00001d032968 Zm00001d033707 Zm00001d003083 Zm00001d011154 Zm00001d012675 Zm00001d027557 Zm00001d031891 Zm00001d042095 Zm00001d029696 Zm00001d048354 Zm00001d027539 Zm00001d008628 Zm00001d027540 Zm00001d016802 Zm00001d049187 Zm00001d015026 Zm00001d048353 Zm00001d043344 Zm00001d046112 Zm00001d025047 Zm00001d017119 Zm00001d0…	zma:103626044 zma:100383462 zma:541849 zma:100193273 zma:542490 zma:100502255 zma:100216831 zma:100191657 zma:542632 zma:542366 zma:541842 zma:100280242 zma:542633 zma:542634 zma:542629 zma:541829 zma:103634830 zma:541830 zma:100283135 zma:100856973 zma:100282933 zma:541831 zma:542740 zma:732743 zma:100282326 zma:100383421 zma:542311 zma:541838 zma:542491 zma:100285887 zma:103637303 zma:103637314…	103626044 100383462 541849 100193273 542490 100502255 100216831 100191657 542632 542366 541842 100280242 542633 542634 542629 541829 103634830 541830 100283135 100856973 100282933 541831 542740 732743 100282326 100383421 542311 541838 542491 100285887 103637303 103637314 100280060 541832 100193965 100194161 542026 542026 100383765 103633099 100192012 541699 100272974 541828 100284317 100272844 54…	GRMZM2G019207 GRMZM2G047968 gst41, GRMZM2G097989 GRMZM2G155546 gst16, GRMZM5G895383 GRMZM2G016241 IDP340, GRMZM2G042040 GRMZM2G082581 pco061770a, GRMZM2G077206 gst1, GRMZM2G116273 gst31, GRMZM2G475059 GRMZM2G389233 siaf244694b GRMZM2G145069, GRMZM2G149182 gst9, GRMZM2G126763 gst11, GRMZM2G119499 GRMZM2G139600 gst12, GRMZM2G096269 pco111578, GRMZM2G006791 pgd3 gst13, GRMZM2G126781 gst8 spesyn, GRM…
			Cyanoamino acid metabolism	24	57	0.356003	0.999997	Zm00001d028199 Zm00001d042661 Zm00001d023994 Zm00001d049234 Zm00001d012247 Zm00001d017352 Zm00001d008628 Zm00001d041763 Zm00001d043348 Zm00001d030859 Zm00001d024891 Zm00001d013269 Zm00001d033649 Zm00001d025847 Zm00001d025846 Zm00001d046334 Zm00001d046210 Zm00001d034015 Zm00001d041777 Zm00001d041776 Zm00001d043110 Zm00001d024037 Zm00001d014489 Zm00001d022367	zma:100192939 zma:100191532 zma:542414 zma:100192461 zma:100286146 zma:542573 zma:103634830 zma:100284975 zma:100274074 zma:100192461 zma:103641409 zma:542684 zma:100274288 zma:100272792 zma:100381294 zma:103638611 zma:100501315 zma:100191390 zma:103650610 zma:100174972 zma:100501315 zma:732807 zma:100279909 zma:100282438	100192939 100191532 542414 100192461 100286146 542573 103634830 100284975 100274074 100192461 103641409 542684 100274288 100272792 100381294 103638611 100501315 100191390 103650610 100174972 100501315 732807 100279909 100282438	GRMZM2G015804 GRMZM2G452630 glu1, GRMZM2G016890, ZmGlu1, p60.1 CL9311_1, GRMZM2G113959, GRMZM2G171116 NIT1, GRMZM2G178517, ZmNIT1 GRMZM2G139600 GRMZM2G424857 GRMZM2G174699 gla3, GRMZM2G473711, ZmGLA3 cl1052_1, GRMZM2G118003 GRMZM2G031660 GRMZM2G138248 GRMZM2G376416 exg1, GRMZM2G147687 GRMZM2G076946 GRMZM2G376416 glu2, GRMZM2G008247, ZmGlu2 GRMZM2G163544 pco088410, GRMZM2G148176
			Pentose phosphate pathway	34	83	0.364758	0.999997	Zm00001d045326 Zm00001d012103 Zm00001d037278 Zm00001d053015 Zm00001d028562 Zm00001d042727 Zm00001d043563 Zm00001d013135 Zm00001d049187 Zm00001d027841 Zm00001d045919 Zm00001d017119 Zm00001d033746 Zm00001d018936 Zm00001d011965 Zm00001d008491 Zm00001d017830 Zm00001d029502 Zm00001d042184 Zm00001d044211 Zm00001d005925 Zm00001d003252 Zm00001d039499 Zm00001d033002 Zm00001d015115 Zm00001d035925 Zm00001d0…	zma:100285548 zma:100272913 zma:100382182 zma:100272845 zma:100284339 zma:100273700 zma:100281464 zma:100285298 zma:100856973 zma:100274365 zma:101027252 zma:100383421 zma:542358 zma:100284771 zma:100284080 zma:100502020 zma:100193340 zma:100383765 zma:541699 zma:103651489 zma:100382805 zma:100284317 zma:100857010 zma:100280694 zma:100272744 zma:541700 zma:100383765 zma:100273196 zma:100282201 zm…	100285548 100272913 100382182 100272845 100284339 100273700 100281464 100285298 100856973 100274365 101027252 100383421 542358 100284771 100284080 100502020 100193340 100383765 541699 103651489 100382805 100284317 100857010 100280694 100272744 541700 100383765 100273196 100282201 542313 100285062 103632535 100191982 100191851	GRMZM2G059151 AY110170, GRMZM2G155253 pco073762 GRMZM5G879882 GRMZM5G874903 pgd3 GRMZM2G026807 GRMZM2G314094 gpm742, GRMZM2G031107 GRMZM2G023289 pco087551, GRMZM2G456086 IDP2350, GRMZM2G134256 GRMZM2G069195 pco110217, GRMZM2G123371 pdh1 GRMZM2G076075 GRMZM2G130230 GRMZM2G132069 GRMZM2G009591 GRMZM2G038791 pgd2, GRMZM2G127798, PGD, pdh2 IDP1438 GRMZM2G178960 phi1, GRMZM2G065083, gpi pco143240a, GR…
			Arginine and proline metabolism	32	78	0.368029	0.999997	Zm00001d051754 Zm00001d020543 Zm00001d010056 Zm00001d043382 Zm00001d054079 Zm00001d001883 Zm00001d046112 Zm00001d004287 Zm00001d005818 Zm00001d004288 Zm00001d051856 Zm00001d013053 Zm00001d020544 Zm00001d045706 Zm00001d029853 Zm00001d051056 Zm00001d012391 Zm00001d005159 Zm00001d025644 Zm00001d000116 Zm00001d024281 Zm00001d043681 Zm00001d021321 Zm00001d038358 Zm00001d051194 Zm00001d032573 Zm00001d0…	zma:542567 zma:103632784 zma:778431 zma:100273311 zma:100381773 zma:100191603 zma:732743 zma:103646736 zma:100282748 zma:103646736 zma:100284871 zma:100857083 zma:100282888 zma:732806 zma:100281186 zma:100283320 zma:100280719 zma:100282908 zma:100280344 zma:100281700 zma:541983 zma:100383200 zma:103633099 zma:778431 zma:100193626 zma:100193348 zma:100272740 zma:100282933 zma:100283657 zma:1003845…	542567 103632784 778431 100273311 100381773 100191603 732743 103646736 100282748 103646736 100284871 100857083 100282888 732806 100281186 100283320 100280719 100282908 100280344 100281700 541983 100383200 103633099 778431 100193626 100193348 100272740 100282933 100283657 100384522 606449 100282625	aldh2, rf2b GRMZM2G060369 AY109740, GRMZM2G375504 pco118382, GRMZM2G094712 pco077065, GRMZM2G078033 spesyn, GRMZM2G047867, spds2 GRMZM2G050937 GRMZM2G130440 GRMZM2G050937 pco093706, GRMZM2G025867 P4H6 IDP754, GRMZM2G461159 rf2, GRMZM2G058675 GRMZM2G053720 GRMZM2G366392 pco085448, GRMZM2G028535 pco075678, GRMZM2G064163 GRMZM2G064159 pao1, GRMZM2G034152, PAO, mpao1 GRMZM2G035994 GRMZM2G052288 AY109…
			Biosynthesis of amino acids	144	371	0.376924	0.999997	Zm00001d002128 Zm00001d011610 Zm00001d049234 Zm00001d013644 Zm00001d033788 Zm00001d027558 Zm00001d023429 Zm00001d042685 Zm00001d049641 Zm00001d035156 Zm00001d046168 Zm00001d043845 Zm00001d031809 Zm00001d024754 Zm00001d043780 Zm00001d014734 Zm00001d014737 Zm00001d008491 Zm00001d030859 Zm00001d025862 Zm00001d035443 Zm00001d033480 Zm00001d030677 Zm00001d010056 Zm00001d040446 Zm00001d027727 Zm00001d0…	zma:100191326 zma:103636185 zma:100192461 zma:541714 zma:100383739 zma:100304277 zma:100273126 zma:100276531 zma:542367 zma:542718 zma:100276497 zma:103651348 zma:100284555 zma:100279822 zma:100283397 zma:100281038 zma:100284089 zma:100502020 zma:100192461 zma:100282861 zma:103629163 zma:100286153 zma:100191234 zma:778431 zma:542177 zma:100284817 zma:100274472 zma:100282201 zma:100382674 zma:1002…	100191326 103636185 100192461 541714 100383739 100304277 100273126 100276531 542367 542718 100276497 103651348 100284555 100279822 100283397 100281038 100284089 100502020 100192461 100282861 103629163 100286153 100191234 778431 542177 100284817 100274472 100282201 100382674 100282324 100191838 606449 100282625 100285548 100502310 100273311 100284885 100191222 103651459 100286146 100282748 1002852…	GRMZM2G004590 GRMZM2G077054 TIDP2999, GRMZM2G112149 GRMZM2G046966, pco124283 IDP553, GRMZM2G176397 GRMZM2G020446 GRMZM2G400604 GAPC, GAPC1, GPC1 GAPC2, GRMZM2G180625, gpc2 GRMZM2G324297 GRMZM2G141634 GRMZM2G050570 GRMZM2G084942 GRMZM2G085117 GRMZM2G069195 GRMZM2G043887 GRMZM2G119583 TIDP3524, GRMZM2G165747 pco102509, GRMZM2G130332 AY109740, GRMZM2G375504 PK gpm584, GRMZM2G300801, psat1 pco075539 …
			Glycosphingolipid biosynthesis - globo series	5	10	0.39023	0.999997	Zm00001d038196 Zm00001d025912 Zm00001d019552 Zm00001d021895 Zm00001d028235	zma:103630365 zma:100283564 zma:100191564 zma:100280704 zma:100280178	103630365 100283564 100191564 100280704 100280178	GRMZM2G121514 GRMZM2G399048 GRMZM2G146463 GRMZM5G860235 GRMZM2G134251
			Plant hormone signal transduction	137	355	0.402722	0.999997	Zm00001d048046 Zm00001d036463 Zm00001d043634 Zm00001d051302 Zm00001d029577 Zm00001d040536 Zm00001d008893 Zm00001d023424 Zm00001d016783 Zm00001d041418 Zm00001d000408 Zm00001d033319 Zm00001d041416 Zm00001d048094 Zm00001d036215 Zm00001d022473 Zm00001d012660 Zm00001d047053 Zm00001d027523 Zm00001d016582 Zm00001d028793 Zm00001d013707 Zm00001d038436 Zm00001d051615 Zm00001d033267 Zm00001d013869 Zm00001d0…	zma:541639 zma:542563 zma:103636232 zma:103653849 zma:107275219 zma:100382453 zma:100193185 zma:103640762 zma:542190 zma:100192924 zma:100281166 zma:100216870 zma:100284259 zma:100279460 zma:100286386 zma:103633549 zma:100281196 zma:100282511 zma:100273485 zma:103627198 zma:103634514 zma:100274141 zma:100216590 zma:103633348 zma:100281419 zma:100191931 zma:100284457 zma:100279520 zma:100272726 zm…	541639 542563 103636232 103653849 107275219 100382453 100193185 103640762 542190 100192924 100281166 100216870 100284259 100279460 100286386 103633549 100281196 100282511 100273485 103627198 103634514 100274141 100216590 103633348 100281419 100191931 100284457 100279520 100272726 100193967 103630727 100284541 100502433 542407 103636390 100384229 100280867 100127531 100273694 100191610 103643147 1…	RR10, GRMZM2G126834, ZmRR10 saur1, GRMZM2G466908 GRMZM2G048294 GRMZM2G115960 GRMZM2G472625 GRMZM2G366264 GRMZM2G000278 umc1527, AUX35, GRMZM2G167794, GRMZM2G167794_T01 si687013d08, GRMZM2G137582 GRMZM2G129247 MPK7, GRMZM2G002100 GRMZM2G414460 GRMZM2G076450 GRMZM2G054634 GRMZM2G312274 GRMZM2G144224, PYL7 pco137466(715), GRMZM2G128421 PYL4 PIL5, GRMZM2G165042 GRMZM2G113135 TIDP3439 TRAF18, GRMZM2G0…
			Monoterpenoid biosynthesis	6	13	0.41982	0.999997	Zm00001d002845 Zm00001d025924 Zm00001d025923 Zm00001d015053 Zm00001d053916 Zm00001d015054	zma:100191789 zma:100282122 zma:100282122 zma:732758 zma:103654934 zma:732759	100191789 100282122 100282122 732758 103654934 732759	pco096967, GRMZM2G168976 pco096967, GRMZM2G168976 TPS2, GRMZM2G046615 TPS3, GRMZM2G064406
			Ascorbate and aldarate metabolism	23	57	0.424467	0.999997	Zm00001d051754 Zm00001d031494 Zm00001d023652 Zm00001d017787 Zm00001d035337 Zm00001d005818 Zm00001d016802 Zm00001d045706 Zm00001d033188 Zm00001d025047 Zm00001d003643 Zm00001d028709 Zm00001d014674 Zm00001d053223 Zm00001d000116 Zm00001d002426 Zm00001d017786 Zm00001d042478 Zm00001d034072 Zm00001d024633 Zm00001d005347 Zm00001d022383 Zm00001d033110	zma:542567 zma:100383462 zma:732776 zma:100279805 zma:100283852 zma:100282748 zma:100283135 zma:732806 zma:100285497 zma:100282326 zma:100194161 zma:100285887 zma:100382378 zma:100193965 zma:100281700 zma:100272974 zma:100193942 zma:100272546 zma:100279549 zma:100272772 zma:100501585 zma:103637520 zma:100283131	542567 100383462 732776 100279805 100283852 100282748 100283135 732806 100285497 100282326 100194161 100285887 100382378 100193965 100281700 100272974 100193942 100272546 100279549 100272772 100501585 103637520 100283131	aldh2, rf2b GRMZM2G047968 pco064579, GRMZM2G126002, GalDH uaz204, GRMZM2G320307 GRMZM2G057186 GRMZM2G130440 pco111578, GRMZM2G006791 rf2, GRMZM2G058675 GRMZM2G004211 GRMZM2G120517 GRMZM2G116586 cl26634_1a, GRMZM2G460406 GRMZM2G156227 si946084h12, GRMZM2G359397, VTC2 TIDP3299, GRMZM2G328500 IDP52, GRMZM5G828229 GRMZM2G084881
			Amino sugar and nucleotide sugar metabolism	72	186	0.432011	0.999997	Zm00001d028572 Zm00001d042768 Zm00001d026311 Zm00001d018965 Zm00001d018966 Zm00001d050032 Zm00001d048126 Zm00001d047797 Zm00001d029794 Zm00001d005925 Zm00001d045078 Zm00001d021026 Zm00001d039131 Zm00001d029023 Zm00001d029516 Zm00001d048907 Zm00001d028952 Zm00001d042514 Zm00001d048903 Zm00001d009967 Zm00001d011792 Zm00001d010796 Zm00001d022085 Zm00001d033910 Zm00001d020093 Zm00001d049804 Zm00001d0…	zma:100274383 zma:107457591 zma:100383103 zma:100280478 zma:100274481 zma:542295 zma:100191571 zma:100193447 zma:100191592 zma:100382805 zma:103629864 zma:100280936 zma:542737 zma:100285437 zma:100281481 zma:100281365 zma:103634588 zma:100285419 zma:100272870 zma:100282424 zma:100282841 zma:542510 zma:100282614 zma:100101531 zma:100283489 zma:100284577 zma:100283208 zma:100382408 zma:100191862 zm…	100274383 107457591 100383103 100280478 100274481 542295 100191571 100193447 100191592 100382805 103629864 100280936 542737 100285437 100281481 100281365 103634588 100285419 100272870 100282424 100282841 542510 100282614 100101531 100283489 100284577 100283208 100382408 100191862 100284854 100272553 542358 100285419 103636518 100282551 100191846 100279339 100279549 542761 100282677 100283489 1003…	GRMZM2G160506 GRMZM2G145460 GRMZM2G328171 GRMZM2G162359 agpsl1, ADPG-PPase, GRMZM2G163437 GRMZM2G178254 gpm140, GRMZM2G165357 GRMZM2G099454 GRMZM2G076075 GRMZM2G168274 GRMZM2G429118 AGP2, GRMZM2G027955 GRMZM2G045467 TIDP2936 GRMZM2G180889 cl9963_1, GRMZM2G078890 GRMZM2G053322 GRMZM2G167872 pco074668, GRMZM2G058745 TIDP3389, GRMZM2G045287 GRMZM2G391936 gpm221a, GRMZM2G138410 pco104428a, GRMZM2G064…
			Monobactam biosynthesis	9	21	0.435846	0.999997	Zm00001d047935 Zm00001d005535 Zm00001d033981 Zm00001d034851 Zm00001d002602 Zm00001d019988 Zm00001d004513 Zm00001d049956 Zm00001d042264	zma:100280882 zma:542708 zma:103643994 zma:103644325 zma:100282239 zma:542708 zma:100281036 zma:100194039 zma:100279553	100280882 542708 103643994 103644325 100282239 542708 100281036 100194039 100279553	akh2, AKHSDH2, GRMZM2G104546 GRMZM2G149952 GRMZM2G024686 GRMZM2G556131 akh2, AKHSDH2, GRMZM2G104546 GRMZM2G158147 cl754_1a
			One carbon pool by folate	9	21	0.435846	0.999997	Zm00001d042661 Zm00001d049234 Zm00001d049188 Zm00001d024301 Zm00001d030859 Zm00001d012247 Zm00001d023534 Zm00001d034602 Zm00001d020669	zma:100191532 zma:100192461 zma:100286018 zma:103641146 zma:100192461 zma:100286146 zma:100192785 zma:541794 zma:541944	100191532 100192461 100286018 103641146 100192461 100286146 100192785 541794 541944	GRMZM2G452630 umc1821 GRMZM2G368902 CL9311_1, GRMZM2G113959, GRMZM2G171116 GRMZM2G001904 csu134, GRMZM2G347056, MTHFR GRMZM5G824944
			Tropane, piperidine and pyridine alkaloid biosynthesis	9	21	0.435846	0.999997	Zm00001d010190 Zm00001d043382 Zm00001d048723 Zm00001d042685 Zm00001d016441 Zm00001d003309 Zm00001d007687 Zm00001d011930 Zm00001d018386	zma:100274472 zma:100273311 zma:103652733 zma:100276531 zma:100191283 zma:100383438 zma:100273624 zma:100501932 zma:100282625	100274472 100273311 103652733 100276531 100191283 100383438 100273624 100501932 100282625	pco075539 pco118382, GRMZM2G094712 GRMZM2G400604 pco115235a pco118120, GRMZM2G147884 IDP610, GRMZM2G152258 GRMZM5G836910
			Fatty acid biosynthesis	27	68	0.43873	0.999997	Zm00001d025201 Zm00001d049975 Zm00001d037108 Zm00001d045387 Zm00001d047255 Zm00001d012033 Zm00001d004125 Zm00001d014294 Zm00001d022144 Zm00001d023238 Zm00001d006080 Zm00001d053127 Zm00001d042344 Zm00001d052485 Zm00001d024998 Zm00001d045295 Zm00001d053009 Zm00001d024273 Zm00001d046454 Zm00001d006866 Zm00001d005148 Zm00001d024723 Zm00001d004019 Zm00001d043851 Zm00001d025170 Zm00001d036919 Zm00001d0…	zma:100273168 zma:100193519 zma:100279917 zma:103638097 zma:100383498 zma:100192652 zma:542319 zma:542319 zma:100193451 zma:100281538 zma:100191192 zma:100281785 zma:100191672 zma:100281546 zma:100037775 zma:100281457 zma:103654554 zma:100382139 zma:100281497 zma:100193451 zma:100284647 zma:100279270 zma:100194244 zma:100383523 zma:100283843 zma:100284999 zma:103640823	100273168 100193519 100279917 103638097 100383498 100192652 542319 542319 100193451 100281538 100191192 100281785 100191672 100281546 100037775 100281457 103654554 100382139 100281497 100193451 100284647 100279270 100194244 100383523 100283843 100284999 103640823	fab1 gpm519, GRMZM2G070422 csu43 cl3036_1, GRMZM2G180399 ACC1, GRMZM5G858094 ACC1, GRMZM5G858094 pco121523, GRMZM2G124335 GRMZM2G176546 pco124661, GRMZM2G143955 pco146226a, GRMZM2G104847 gpm375a, GRMZM5G852502 GRMZM2G059381 acc1 GRMZM5G812228 GRMZM2G119305 GRMZM2G406603 pco121523, GRMZM2G124335 si496011d04, GRMZM2G017382 TIDP2980, GRMZM2G101875, gpm13 GRMZM2G026793 GRMZM2G152127 csu333 GRMZM2G079…
			Valine, leucine and isoleucine biosynthesis	12	29	0.444957	0.999997	Zm00001d029848 Zm00001d044035 Zm00001d053960 Zm00001d017467 Zm00001d002880 Zm00001d007288 Zm00001d023243 Zm00001d026675 Zm00001d049929 Zm00001d015088 Zm00001d017168 Zm00001d033750	zma:100191754 zma:100193695 zma:100193712 zma:100286245 zma:100284589 zma:100279727 zma:100280499 zma:100283376 zma:100384514 zma:100284902 zma:100381801 zma:103643901	100191754 100193695 100193712 100286245 100284589 100279727 100280499 100283376 100384514 100284902 100381801 103643901	pco098993(576), GRMZM2G071208 GRMZM2G004382 PCO109372, GRMZM2G010044 GRMZM5G840002 cl362_2b, GRMZM5G803490 GRMZM2G077215 GRMZM2G130062 GRMZM2G104613 GRMZM2G370852 GRMZM2G007647 GRMZM2G155323
			Base excision repair	20	50	0.448036	0.999997	Zm00001d009231 Zm00001d031275 Zm00001d037258 Zm00001d005767 Zm00001d020505 Zm00001d039115 Zm00001d051995 Zm00001d044780 Zm00001d012918 Zm00001d024509 Zm00001d016581 Zm00001d043835 Zm00001d053070 Zm00001d008890 Zm00001d031750 Zm00001d031751 Zm00001d026402 Zm00001d036751 Zm00001d043188 Zm00001d024423	zma:103635146 zma:100282754 zma:107275233 zma:103649150 zma:103632764 zma:100274123 zma:542357 zma:100383279 zma:732817 zma:100280534 zma:103627197 zma:103651343 zma:103654581 zma:100279971 zma:100280690 zma:100280690 zma:103642101 zma:100273102 zma:100191243 zma:103642510	103635146 100282754 107275233 103649150 103632764 100274123 542357 100383279 732817 100280534 103627197 103651343 103654581 100279971 100280690 100280690 103642101 100273102 100191243 103642510	PARP, GRMZM2G099231, GRMZM2G124718 csu92a, GRMZM2G164062 GRMZM2G160738 GRMZM2G114592 magi81248, GRMZM2G108712, ZmPCNA2, pcna2 GRMZM5G833563 FEN1, FEN-1, GRMZM2G121262, pco066214a GRMZM2G369260 GRMZM2G011631, GRMZM2G426847 GRMZM2G005536, GRMZM2G148626 GRMZM2G154267 GRMZM2G154267 GRMZM2G480171 TIDP2935, GRMZM2G169333
			Fatty acid metabolism	42	108	0.450945	0.999997	Zm00001d023768 Zm00001d051636 Zm00001d017841 Zm00001d053308 Zm00001d025201 Zm00001d008401 Zm00001d049975 Zm00001d045606 Zm00001d039856 Zm00001d045387 Zm00001d009182 Zm00001d047255 Zm00001d012033 Zm00001d004125 Zm00001d017111 Zm00001d053009 Zm00001d018487 Zm00001d023769 Zm00001d014294 Zm00001d037939 Zm00001d037108 Zm00001d022144 Zm00001d023238 Zm00001d053127 Zm00001d042344 Zm00001d052485 Zm00001d0…	zma:103640919 zma:100282744 zma:100381639 zma:103654691 zma:100273168 zma:100285661 zma:100193519 zma:100382424 zma:100274548 zma:103638097 zma:100285945 zma:100383498 zma:100192652 zma:542319 zma:542359 zma:103654554 zma:100192501 zma:100273207 zma:542319 zma:103630229 zma:100279917 zma:100193451 zma:100281538 zma:100281785 zma:100191672 zma:100281546 zma:100274017 zma:100037775 zma:100281457 zm…	103640919 100282744 100381639 103654691 100273168 100285661 100193519 100382424 100274548 103638097 100285945 100383498 100192652 542319 542359 103654554 100192501 100273207 542319 103630229 100279917 100193451 100281538 100281785 100191672 100281546 100274017 100037775 100281457 103653730 100382139 100284318 100281497 100193451 100284647 100279270 100194244 100383523 100283843 103633692 10028499…	GRMZM2G169240 GRMZM2G161792 fab1 gpm519, GRMZM2G070422 GRMZM2G052389 GRMZM2G151087 GRMZM2G132903 csu43 cl3036_1, GRMZM2G180399 ACC1, GRMZM5G858094 gl8 GRMZM5G848768 ACC1, GRMZM5G858094 GRMZM2G117357 pco121523, GRMZM2G124335 GRMZM2G176546 pco146226a, GRMZM2G104847 gpm375a, GRMZM5G852502 GRMZM2G059381 GRMZM5G860137 acc1 GRMZM5G812228 gl8b GRMZM2G119305 cl20712_1(629), GRMZM2G035202 GRMZM2G406603 pc…
			Glycosphingolipid biosynthesis - ganglio series	3	6	0.462717	0.999997	Zm00001d038196 Zm00001d021895 Zm00001d028235	zma:103630365 zma:100280704 zma:100280178	103630365 100280704 100280178	GRMZM2G121514 GRMZM5G860235 GRMZM2G134251
			Sulfur relay system	6	14	0.475258	0.999997	Zm00001d027872 Zm00001d020139 Zm00001d016866 Zm00001d031024 Zm00001d018148 Zm00001d051608	zma:100192515 zma:100282194 zma:100272516 zma:100275494 zma:100193637 zma:100191959	100192515 100282194 100272516 100275494 100193637 100191959	pco084690, GRMZM2G322314 GRMZM2G135816 pco128327 GRMZM2G402242 MOCS3-2, UBA4-2
			Fatty acid degradation	23	59	0.478728	0.999997	Zm00001d051754 Zm00001d030347 Zm00001d033931 Zm00001d053308 Zm00001d005818 Zm00001d008401 Zm00001d018468 Zm00001d045706 Zm00001d009182 Zm00001d018487 Zm00001d037939 Zm00001d045606 Zm00001d000116 Zm00001d023238 Zm00001d053127 Zm00001d052485 Zm00001d008432 Zm00001d045295 Zm00001d053009 Zm00001d027996 Zm00001d024723 Zm00001d043851 Zm00001d023538	zma:542567 zma:100272357 zma:542363 zma:103654691 zma:100282748 zma:100285661 zma:542459 zma:732806 zma:100285945 zma:100192501 zma:103630229 zma:100382424 zma:100281700 zma:100281538 zma:100281785 zma:100281546 zma:100274017 zma:100281457 zma:103654554 zma:100273217 zma:100279270 zma:100383523 zma:103640823	542567 100272357 542363 103654691 100282748 100285661 542459 732806 100285945 100192501 103630229 100382424 100281700 100281538 100281785 100281546 100274017 100281457 103654554 100273217 100279270 100383523 103640823	aldh2, rf2b GRMZM2G152981 adh1, Adh1-1F, Adh1-1S, GRMZM2G442658 GRMZM2G130440 fdh1, GRMZM5G824600, fdh rf2, GRMZM2G058675 GRMZM2G132903 GRMZM5G848768 GRMZM2G117357 GRMZM2G052389 GRMZM2G176546 pco146226a, GRMZM2G104847 GRMZM2G059381 GRMZM5G860137 GRMZM5G812228 pco147721a TIDP2980, GRMZM2G101875, gpm13 GRMZM2G152127 GRMZM2G118286
			2-Oxocarboxylic acid metabolism	33	86	0.489714	0.999997	Zm00001d043382 Zm00001d044135 Zm00001d026675 Zm00001d015497 Zm00001d015088 Zm00001d053684 Zm00001d027558 Zm00001d004564 Zm00001d044035 Zm00001d021956 Zm00001d053960 Zm00001d024952 Zm00001d046334 Zm00001d034851 Zm00001d002880 Zm00001d035443 Zm00001d007288 Zm00001d030557 Zm00001d051359 Zm00001d049929 Zm00001d003083 Zm00001d014258 Zm00001d042264 Zm00001d029848 Zm00001d017676 Zm00001d017467 Zm00001d0…	zma:100273311 zma:103651459 zma:100283376 zma:103646899 zma:100284902 zma:100194338 zma:100304277 zma:103646899 zma:100193695 zma:103633364 zma:100193712 zma:100281040 zma:103638611 zma:103644325 zma:100284589 zma:103629163 zma:100279727 zma:100193705 zma:100273023 zma:100384514 zma:100191657 zma:100282849 zma:100279553 zma:100191754 zma:100283456 zma:100286245 zma:100280499 zma:100282691 zma:100…	100273311 103651459 100283376 103646899 100284902 100194338 100304277 103646899 100193695 103633364 100193712 100281040 103638611 103644325 100284589 103629163 100279727 100193705 100273023 100384514 100191657 100282849 100279553 100191754 100283456 100286245 100280499 100282691 100216599 100381801 103647708 100191877 100282625	pco118382, GRMZM2G094712 GRMZM2G104613 GRMZM2G467338 GRMZM2G370852 cl5118_1 IDP553, GRMZM2G176397 GRMZM2G467338 GRMZM2G004382 GRMZM5G813007 PCO109372, GRMZM2G010044 aco2, GRMZM5G858454 GRMZM2G138248 GRMZM2G024686 cl362_2b, GRMZM5G803490 GRMZM2G119583 GRMZM2G077215 GRMZM5G828630 GRMZM2G323719 GRMZM2G082581 uaz158(alt), GRMZM2G088064 cl754_1a pco098993(576), GRMZM2G071208 pco121857a, GRMZM2G181273 …
			Butanoate metabolism	13	33	0.495684	0.999997	Zm00001d050810 Zm00001d052444 Zm00001d047981 Zm00001d003531 Zm00001d015404 Zm00001d003522 Zm00001d002326 Zm00001d026293 Zm00001d007288 Zm00001d031749 Zm00001d008432 Zm00001d017168 Zm00001d015406	zma:100282207 zma:100283677 zma:100381655 zma:100284551 zma:100284047 zma:100273302 zma:103645944 zma:100286148 zma:100279727 zma:100501579 zma:100274017 zma:100381801 zma:100280779	100282207 100283677 100381655 100284551 100284047 100273302 103645944 100286148 100279727 100501579 100274017 100381801 100280779	cl173_1a, GRMZM2G095141 GRMZM2G098875 pco117429, GRMZM2G101069 GRMZM2G355906 GRMZM5G817886 GRMZM2G108125 GRMZM2G077215 GRMZM5G860137 GRMZM2G007647 GRMZM2G128114
			Phenylalanine, tyrosine and tryptophan biosynthesis	28	73	0.496993	0.999997	Zm00001d043382 Zm00001d002128 Zm00001d034713 Zm00001d041700 Zm00001d033788 Zm00001d047896 Zm00001d042685 Zm00001d040850 Zm00001d046168 Zm00001d034452 Zm00001d003395 Zm00001d014734 Zm00001d014737 Zm00001d053374 Zm00001d045450 Zm00001d029391 Zm00001d010190 Zm00001d028536 Zm00001d025333 Zm00001d016441 Zm00001d034460 Zm00001d025652 Zm00001d052797 Zm00001d020008 Zm00001d006900 Zm00001d028712 Zm00001d0…	zma:100273311 zma:100191326 zma:103625743 zma:100272333 zma:100383739 zma:100272984 zma:100276531 zma:100285997 zma:100276497 zma:103644181 zma:542286 zma:100281038 zma:100284089 zma:100194071 zma:542727 zma:100284499 zma:100274472 zma:101027130 zma:100279620 zma:100191283 zma:541855 zma:100274566 zma:100272293 zma:100382674 zma:103652654 zma:100281744 zma:100286040 zma:100282625	100273311 100191326 103625743 100272333 100383739 100272984 100276531 100285997 100276497 103644181 542286 100281038 100284089 100194071 542727 100284499 100274472 101027130 100279620 100191283 541855 100274566 100272293 100382674 103652654 100281744 100286040 100282625	pco118382, GRMZM2G094712 GRMZM2G004590 GRMZM2G003109 GRMZM5G804881 GRMZM2G046966, pco124283 pco087106a, GRMZM2G036861 GRMZM2G400604 cl40355_1, GRMZM2G314652 GRMZM2G324297 GRMZM2G015436 pco123247b, GRMZM2G325131 GRMZM2G084942 GRMZM2G085117 eps1, GRMZM5G877500, epsp-s GRMZM2G117707 pco075539 GRMZM2G161337 GRMZM2G125923 pco115235a igl1, GRMZM2G046191, TSAlike GRMZM2G169516 GRMZM5G828182 GRMZM2G10695…
			Inositol phosphate metabolism	33	87	0.512111	0.999997	Zm00001d037332 Zm00001d035004 Zm00001d035471 Zm00001d013442 Zm00001d021310 Zm00001d013469 Zm00001d013393 Zm00001d033853 Zm00001d012407 Zm00001d016470 Zm00001d030083 Zm00001d019054 Zm00001d028746 Zm00001d047447 Zm00001d022391 Zm00001d014906 Zm00001d053801 Zm00001d034875 Zm00001d014292 Zm00001d034714 Zm00001d050089 Zm00001d028180 Zm00001d029209 Zm00001d049076 Zm00001d039865 Zm00001d032539 Zm00001d0…	zma:103643294 zma:103628939 zma:100285723 zma:103625953 zma:100191222 zma:100216938 zma:103627995 zma:100194132 zma:100280823 zma:103627151 zma:732818 zma:100274311 zma:100191466 zma:100191466 zma:100381628 zma:103626494 zma:100384405 zma:103644330 zma:100384851 zma:100285723 zma:103653328 zma:542540 zma:103635048 zma:103652867 zma:100272481 zma:103643394 zma:100282992 zma:542492 zma:100280012 zm…	103643294 103628939 100285723 103625953 100191222 100216938 103627995 100194132 100280823 103627151 732818 100274311 100191466 100191466 100381628 103626494 100384405 103644330 100384851 100285723 103653328 542540 103635048 103652867 100272481 103643394 100282992 542492 100280012 103632727 100281652 100037797 100283131	GRMZM2G092595 GRMZM2G040296 AY110160, GRMZM2G139041 GRMZM2G114162 GRMZM5G852968 GRMZM2G157147 GRMZM2G146206 GRMZM2G084609 lpa2, GRMZM2G456626, ITPK1 pco061337, GRMZM2G001898, GRMZM2G108076 GRMZM2G114354 GRMZM2G114354 GRMZM2G036113 GRMZM2G137435 PCO088312 GRMZM2G422670 AY110160, GRMZM2G139041 lpa1, INO1 GRMZM5G831486 GRMZM2G176698 TIM, GRMZM2G030784 GRMZM2G374973 si618046c10b, GRMZM2G149903 dnp1, …
			Propanoate metabolism	16	42	0.528253	0.999997	Zm00001d023694 Zm00001d007892 Zm00001d024998 Zm00001d014944 Zm00001d016659 Zm00001d019054 Zm00001d014294 Zm00001d000133 Zm00001d008432 Zm00001d009212 Zm00001d014945 Zm00001d004125 Zm00001d040670 Zm00001d051129 Zm00001d021908 Zm00001d017258	zma:100191513 zma:100273293 zma:100037775 zma:100282503 zma:103646525 zma:100274311 zma:542319 zma:103646525 zma:100274017 zma:100381818 zma:100193279 zma:542319 zma:100283617 zma:100284286 zma:100216609 zma:100284286	100191513 100273293 100037775 100282503 103646525 100274311 542319 103646525 100274017 100381818 100193279 542319 100283617 100284286 100216609 100284286	pco079304 pco118301, GRMZM2G037614 acc1 cl2158_1, GRMZM2G128929 GRMZM2G157269 pco061337, GRMZM2G001898, GRMZM2G108076 ACC1, GRMZM5G858094 GRMZM2G157269 GRMZM5G860137 GRMZM2G145595 GRMZM2G173192 ACC1, GRMZM5G858094 GRMZM2G033644 GRMZM2G072054
			Plant-pathogen interaction	78	209	0.536649	0.999997	Zm00001d021090 Zm00001d011841 Zm00001d054079 Zm00001d044411 Zm00001d008278 Zm00001d050575 Zm00001d018233 Zm00001d012552 Zm00001d052458 Zm00001d009248 Zm00001d002287 Zm00001d011392 Zm00001d005059 Zm00001d044172 Zm00001d029558 Zm00001d052147 Zm00001d038618 Zm00001d052653 Zm00001d052987 Zm00001d003212 Zm00001d051502 Zm00001d010649 Zm00001d031676 Zm00001d003197 Zm00001d043025 Zm00001d045359 Zm00001d0…	zma:100279924 zma:103636275 zma:100381773 zma:100381663 zma:100381297 zma:100283091 zma:103627804 zma:103636568 zma:100280890 zma:103635158 zma:103645931 zma:100286149 zma:103647156 zma:100282745 zma:103636577 zma:100275358 zma:100273558 zma:100136880 zma:606485 zma:100273422 zma:103653932 zma:103635808 zma:100279924 zma:100280813 zma:100279301 zma:542356 zma:100285658 zma:103651170 zma:542224 zm…	100279924 103636275 100381773 100381663 100381297 100283091 103627804 103636568 100280890 103635158 103645931 100286149 103647156 100282745 103636577 100275358 100273558 100136880 606485 100273422 103653932 103635808 100279924 100280813 100279301 542356 100285658 103651170 542224 100272455 103640123 100285607 100191751 100191751 100283718 103654363 103648263 100275623 541988 542703 100101532 1002…	IDP295, GRMZM2G317770 GRMZM2G340313 GRMZM2G072052 si606018d05, GRMZM2G140095 GRMZM2G141642, GRMZM2G161800 GRMZM2G022547 GRMZM2G080041 GRMZM2G025387 IDP1602 GRMZM2G304442 GRMZM2G158860 GRMZM2G078781 rbohD, p-au02f03, p-umc1051, umc1051 MRPR1 GRMZM2G051984 GRMZM2G081310 GRMZM2G005557 IDP295, GRMZM2G317770 GRMZM2G062673 TIDP2949, GRMZM2G148087_T01, WRKY43 mek1, GRMZM2G167856 GRMZM2G012229 CDPK1, GRM…
			Glycolysis / Gluconeogenesis	72	193	0.53815	0.999997	Zm00001d051754 Zm00001d018961 Zm00001d045326 Zm00001d012103 Zm00001d044211 Zm00001d033931 Zm00001d025586 Zm00001d043086 Zm00001d021310 Zm00001d016934 Zm00001d005925 Zm00001d029025 Zm00001d028562 Zm00001d042727 Zm00001d043563 Zm00001d049641 Zm00001d005818 Zm00001d012407 Zm00001d038579 Zm00001d043993 Zm00001d010796 Zm00001d018468 Zm00001d005674 Zm00001d033405 Zm00001d045919 Zm00001d045706 Zm00001d0…	zma:542567 zma:100193244 zma:100285548 zma:100272913 zma:103651489 zma:542363 zma:100191144 zma:100381658 zma:100191222 zma:100383712 zma:100382805 zma:103634611 zma:100284339 zma:100273700 zma:100281464 zma:542367 zma:100282748 zma:100280823 zma:100281237 zma:100282738 zma:542510 zma:542459 zma:100283280 zma:100279954 zma:101027252 zma:732806 zma:541781 zma:100217298 zma:100274470 zma:732791 zma…	542567 100193244 100285548 100272913 103651489 542363 100191144 100381658 100191222 100383712 100382805 103634611 100284339 100273700 100281464 542367 100282748 100280823 100281237 100282738 542510 542459 100283280 100279954 101027252 732806 541781 100217298 100274470 732791 542358 542718 100282503 100193279 100279748 542316 100274483 542177 542578 100502020 100381818 103635817 103634444 10028170…	aldh2, rf2b IDP1624, GRMZM2G066290 adh1, Adh1-1F, Adh1-1S, GRMZM2G442658 GRMZM2G125233 GRMZM2G003385 GRMZM5G852968 GRMZM2G056629 GRMZM2G076075 GRMZM2G050077 pco073762 GRMZM5G879882 GAPC, GAPC1, GPC1 GRMZM2G130440 GRMZM2G146206 GRMZM2G089136 GRMZM2G003354 pco074668, GRMZM2G058745 fdh1, GRMZM5G824600, fdh GRMZM2G034848 GRMZM2G314094 rf2, GRMZM2G058675 GRMZM2G015132 GRMZM2G041356 GRMZM2G009030, enol…
			Flavone and flavonol biosynthesis	3	7	0.541323	0.999997	Zm00001d047425 Zm00001d010521 Zm00001d047424	zma:103639113 zma:100279887 zma:100278079	103639113 100279887 100278079	GRMZM2G119067 GRMZM2G160763
			Ether lipid metabolism	14	37	0.541541	0.999997	Zm00001d034875 Zm00001d006257 Zm00001d034714 Zm00001d035471 Zm00001d046508 Zm00001d013014 Zm00001d017584 Zm00001d042057 Zm00001d029684 Zm00001d008727 Zm00001d033683 Zm00001d014760 Zm00001d005770 Zm00001d039670	zma:103644330 zma:103647629 zma:100285723 zma:100285723 zma:100279815 zma:100382466 zma:103627540 zma:100280012 zma:100501678 zma:542702 zma:100191566 zma:100191712 zma:103647433 zma:542702	103644330 103647629 100285723 100285723 100279815 100382466 103627540 100280012 100501678 542702 100191566 100191712 103647433 542702	GRMZM2G422670 GRMZM2G108912 AY110160, GRMZM2G139041 AY110160, GRMZM2G139041 AY110479 GRMZM2G481755 GRMZM2G479112 PLD1 TIDP3349, GRMZM2G116243 GRMZM2G159125 PLD1
			Sulfur metabolism	18	48	0.546533	0.999997	Zm00001d021762 Zm00001d008379 Zm00001d045327 Zm00001d038737 Zm00001d048150 Zm00001d027536 Zm00001d031617 Zm00001d033981 Zm00001d029324 Zm00001d043101 Zm00001d031024 Zm00001d023698 Zm00001d047166 Zm00001d045340 Zm00001d004513 Zm00001d043941 Zm00001d048785 Zm00001d006645	zma:100857094 zma:100280321 zma:100502310 zma:541958 zma:100276991 zma:103631673 zma:103642918 zma:103643994 zma:541650 zma:103651084 zma:100275494 zma:542492 zma:541650 zma:103638081 zma:100281036 zma:100283164 zma:100276991 zma:100217102	100857094 100280321 100502310 541958 100276991 103631673 103642918 103643994 541650 103651084 100275494 542492 541650 103638081 100281036 100283164 100276991 100217102	cys1 sat1, GRMZM2G069203 GRMZM5G895554 GRMZM2G048740 GRMZM2G114739 GRMZM2G149952 cgs1, GRMZM2G075153 pco128327 dnp1, DP1, GRMZM2G152757 cgs1, GRMZM2G075153 GRMZM2G003289 GRMZM2G158147 IDP546 GRMZM5G895554 GRMZM2G327406, ak1
			Selenocompound metabolism	10	27	0.575415	0.999997	Zm00001d028038 Zm00001d028218 Zm00001d011099 Zm00001d047166 Zm00001d053118 Zm00001d013644 Zm00001d029324 Zm00001d004513 Zm00001d033480 Zm00001d033981	zma:103631953 zma:103632740 zma:541786 zma:541650 zma:100272704 zma:541714 zma:541650 zma:100281036 zma:100286153 zma:103643994	103631953 103632740 541786 541650 100272704 541714 541650 100281036 100286153 103643994	GRMZM2G029055 GRMZM2G099628 cl1511_1, GRMZM2G098031, GRMZM2G098039, MMT, MMT1 cgs1, GRMZM2G075153 GRMZM5G889769 TIDP2999, GRMZM2G112149 cgs1, GRMZM2G075153 GRMZM2G158147 TIDP3524, GRMZM2G165747 GRMZM2G149952
			Lysine degradation	15	41	0.58296	0.999997	Zm00001d051754 Zm00001d003947 Zm00001d052079 Zm00001d045706 Zm00001d009134 Zm00001d000116 Zm00001d025240 Zm00001d038541 Zm00001d019520 Zm00001d008432 Zm00001d005818 Zm00001d031858 Zm00001d036328 Zm00001d020984 Zm00001d003923	zma:542567 zma:100383579 zma:541648 zma:732806 zma:103635090 zma:100281700 zma:100383579 zma:542102 zma:103647308 zma:100274017 zma:100282748 zma:100382441 zma:100383579 zma:100283462 zma:100284269	542567 100383579 541648 732806 103635090 100281700 100383579 542102 103647308 100274017 100282748 100382441 100383579 100283462 100284269	aldh2, rf2b GRMZM2G142863 lkrsdh1, GRMZM2G181362 rf2, GRMZM2G058675 GRMZM2G428628 GRMZM2G142863 GRMZM2G117458 GRMZM2G025924 GRMZM5G860137 GRMZM2G130440 GRMZM2G165011 GRMZM2G142863 pco143515, GRMZM2G052266 GRMZM5G807639
			Biosynthesis of unsaturated fatty acids	19	52	0.583297	0.999997	Zm00001d018487 Zm00001d010536 Zm00001d039856 Zm00001d024273 Zm00001d023769 Zm00001d045606 Zm00001d023768 Zm00001d051636 Zm00001d025170 Zm00001d025201 Zm00001d017841 Zm00001d042344 Zm00001d004019 Zm00001d026144 Zm00001d012033 Zm00001d018847 Zm00001d017111 Zm00001d050992 Zm00001d008401	zma:100192501 zma:100284318 zma:100274548 zma:100382139 zma:100273207 zma:100382424 zma:103640919 zma:100282744 zma:100283843 zma:100273168 zma:100381639 zma:100191672 zma:100194244 zma:100273486 zma:100192652 zma:103633692 zma:542359 zma:103653730 zma:100285661	100192501 100284318 100274548 100382139 100273207 100382424 103640919 100282744 100283843 100273168 100381639 100191672 100194244 100273486 100192652 103633692 542359 103653730 100285661	GRMZM5G848768 cl20712_1(629), GRMZM2G035202 GRMZM2G151087 GRMZM2G119305 GRMZM2G052389 GRMZM2G169240 csu333 fab1 GRMZM2G161792 gpm375a, GRMZM5G852502 GRMZM2G026793 cl483_1, GRMZM2G344476 cl3036_1, GRMZM2G180399 GRMZM2G073929 gl8 gl8b
			Glycerolipid metabolism	31	85	0.587706	0.999997	Zm00001d030117 Zm00001d051754 Zm00001d047849 Zm00001d018595 Zm00001d014425 Zm00001d013014 Zm00001d005818 Zm00001d009967 Zm00001d038366 Zm00001d014984 Zm00001d045927 Zm00001d045706 Zm00001d018406 Zm00001d048766 Zm00001d053149 Zm00001d000116 Zm00001d036982 Zm00001d020537 Zm00001d031428 Zm00001d041596 Zm00001d038620 Zm00001d049616 Zm00001d035737 Zm00001d019552 Zm00001d028539 Zm00001d017584 Zm00001d0…	zma:103637735 zma:542567 zma:100283642 zma:100277683 zma:100285746 zma:100382466 zma:100282748 zma:100282424 zma:100191740 zma:100281051 zma:100217122 zma:732806 zma:100281388 zma:100282234 zma:100383181 zma:100281700 zma:103629820 zma:100274282 zma:100383973 zma:103650549 zma:100285585 zma:103655222 zma:100274052 zma:100191564 zma:103634168 zma:103627540 zma:100280283 zma:100279857 zma:100127508…	103637735 542567 100283642 100277683 100285746 100382466 100282748 100282424 100191740 100281051 100217122 732806 100281388 100282234 100383181 100281700 103629820 100274282 100383973 103650549 100285585 103655222 100274052 100191564 103634168 103627540 100280283 100279857 100127508 103629820 103648202	aldh2, rf2b GRMZM2G117153 GRMZM2G477503 AY110479 GRMZM2G130440 GRMZM2G053322 GRMZM2G059637 GRMZM2G020320 cl28396_1a, CL28396_1_ov, GRMZM2G050641, cl28396_1(157) rf2, GRMZM2G058675 si660066d07 si486045a09, GRMZM2G175453 DGAT1-2, GRMZM2G169089 GRMZM2G142873 GRMZM2G141320 GRMZM2G014981 GRMZM2G131378 pco079415(520), GRMZM2G018786 GRMZM2G146463 GRMZM2G049190 GRMZM2G481755 GRMZM2G166176 pco106687 DGAT1…
			Taurine and hypotaurine metabolism	7	19	0.58981	0.999997	Zm00001d012699 Zm00001d047981 Zm00001d003531 Zm00001d003522 Zm00001d031749 Zm00001d039533 Zm00001d008628	zma:100191514 zma:100381655 zma:100284551 zma:100273302 zma:100501579 zma:103649652 zma:103634830	100191514 100381655 100284551 100273302 100501579 103649652 103634830	GRMZM2G136250 GRMZM2G098875 pco117429, GRMZM2G101069 GRMZM2G355906 GRMZM2G139600
			Steroid biosynthesis	17	47	0.597708	0.999997	Zm00001d028299 Zm00001d019139 Zm00001d044120 Zm00001d053035 Zm00001d013037 Zm00001d013035 Zm00001d008395 Zm00001d011765 Zm00001d006889 Zm00001d010265 Zm00001d039384 Zm00001d014887 Zm00001d034516 Zm00001d008569 Zm00001d053889 Zm00001d048585 Zm00001d013014	zma:100274333 zma:541682 zma:100273258 zma:100283692 zma:100286381 zma:100282501 zma:101027160 zma:100282050 zma:100281352 zma:103635655 zma:107305676 zma:542549 zma:100191601 zma:100282855 zma:103654926 zma:542766 zma:100382466	100274333 541682 100273258 100283692 100286381 100282501 101027160 100282050 100281352 103635655 107305676 542549 100191601 100282855 103654926 542766 100382466	GRMZM2G091456 SMT, ESMT1, GRMZM2G122810, smt1 GRMZM2G149224 GRMZM2G003853 GRMZM2G473533 GRMZM2G096029 DWF1, GRMZM2G057000 GRMZM2G029396 GRMZM2G167085 GRMZM2G065494 gpm633 AY110479
			Limonene and pinene degradation	3	8	0.612789	0.999997	Zm00001d045706 Zm00001d051754 Zm00001d000116	zma:732806 zma:542567 zma:100281700	732806 542567 100281700	rf2, GRMZM2G058675 aldh2, rf2b
			Aminoacyl-tRNA biosynthesis	40	111	0.615938	0.999997	Zm00001d004871 Zm00001d013778 Zm00001d010868 Zm00001d003879 Zm00001d034764 Zm00001d043508 Zm00001d034766 Zm00001d002104 Zm00001d031674 Zm00001d006322 Zm00001d043548 Zm00001d039816 Zm00001d045605 Zm00001d045604 Zm00001d018274 Zm00001d028038 Zm00001d048372 Zm00001d009271 Zm00001d003430 Zm00001d053901 Zm00001d007369 Zm00001d021507 Zm00001d046581 Zm00001d039578 Zm00001d018870 Zm00001d013656 Zm00001d0…	zma:103645723 zma:100280510 zma:103635898 zma:103643028 zma:103645723 zma:100272291 zma:103645723 zma:100285129 zma:103643028 zma:100192902 zma:100280209 zma:100382529 zma:103638191 zma:103638191 zma:100275420 zma:103631953 zma:100281059 zma:100281485 zma:100273682 zma:100383787 zma:100272738 zma:103633183 zma:100273774 zma:100284312 zma:100283555 zma:100274537 zma:100382190 zma:100280365 zma:103…	103645723 100280510 103635898 103643028 103645723 100272291 103645723 100285129 103643028 100192902 100280209 100382529 103638191 103638191 100275420 103631953 100281059 100281485 100273682 100383787 100272738 103633183 100273774 100284312 100283555 100274537 100382190 100280365 103632740 100381695 103634773 542538 103633183 100279253 103626016 100383787 100280512 103644288 103641233 100194398	GRMZM2G118062, GRMZM2G155899 GRMZM2G386714 GRMZM2G041797 GRMZM2G118062, GRMZM2G155899 pco069460, GRMZM2G177970 GRMZM2G118062, GRMZM2G155899 GRMZM2G041797 GRMZM2G002851 GRMZM5G805350 GRMZM5G805350 GRMZM2G029055 GRMZM2G057491 pco123869, GRMZM2G083836 GRMZM2G012404 GRMZM2G172101 GRMZM2G455085 GRMZM2G348666, cl553_1 GRMZM2G107089 pco071008b, GRMZM2G136889 TIDP3331 GRMZM2G099628 GRMZM2G091560 GRMZM2G5…
			Arachidonic acid metabolism	6	17	0.628649	0.999997	Zm00001d037079 Zm00001d034630 Zm00001d026154 Zm00001d013014 Zm00001d033683 Zm00001d008628	zma:100272844 zma:100382637 zma:100280060 zma:100382466 zma:100191566 zma:103634830	100272844 100382637 100280060 100382466 100191566 103634830	GRMZM2G012479 pco135148, GRMZM2G155580 GRMZM5G884600 AY110479 GRMZM2G139600
			AGE-RAGE signaling pathway in diabetic complications	6	17	0.628649	0.999997	Zm00001d015036 Zm00001d053899 Zm00001d028746 Zm00001d038688 Zm00001d047447 Zm00001d014906	zma:542094 zma:542094 zma:100191466 zma:542017 zma:100191466 zma:103626494	542094 542094 100191466 542017 100191466 103626494	rop9, GRMZM5G803949 rop9, GRMZM5G803949 GRMZM2G114354 rop6, GRMZM2G176217 GRMZM2G114354 GRMZM2G137435
			Pyruvate metabolism	45	126	0.639075	0.999997	Zm00001d051754 Zm00001d018961 Zm00001d037961 Zm00001d015976 Zm00001d001881 Zm00001d014294 Zm00001d037962 Zm00001d005818 Zm00001d004125 Zm00001d003247 Zm00001d020057 Zm00001d033405 Zm00001d045706 Zm00001d016365 Zm00001d052289 Zm00001d034241 Zm00001d022229 Zm00001d053453 Zm00001d014944 Zm00001d014945 Zm00001d016166 Zm00001d010321 Zm00001d000316 Zm00001d023606 Zm00001d004123 Zm00001d037775 Zm00001d0…	zma:542567 zma:100193244 zma:542331 zma:103626912 zma:100280536 zma:542319 zma:542331 zma:100282748 zma:542319 zma:542252 zma:542393 zma:100279954 zma:732806 zma:541781 zma:732791 zma:100282134 zma:107305678 zma:542479 zma:100282503 zma:100193279 zma:542479 zma:103635678 zma:542233 zma:100274483 zma:100280481 zma:100191237 zma:542177 zma:100281700 zma:542374 zma:103646525 zma:100275430 zma:542393…	542567 100193244 542331 103626912 100280536 542319 542331 100282748 542319 542252 542393 100279954 732806 541781 732791 100282134 107305678 542479 100282503 100193279 542479 103635678 542233 100274483 100280481 100191237 542177 100281700 542374 103646525 100275430 542393 100274017 100037775 100272519 542177 541622 100284598 100279748 103646525 100280499 100381818 542759 100191762 100280767	aldh2, rf2b IDP1624, GRMZM2G066290 me2, GRMZM2G122479 GRMZM2G081268 GRMZM2G077541 ACC1, GRMZM5G858094 me2, GRMZM2G122479 GRMZM2G130440 ACC1, GRMZM5G858094 mas1, GRMZM2G102183, LIP, MS pep4, GRMZM2G473001, pep rf2, GRMZM2G058675 GRMZM2G015132 pdh1 GRMZM2G072744 pep7, Ppc1C cl2158_1, GRMZM2G128929 GRMZM2G173192 pep7, Ppc1C CYPPDKZM2, GRMZM2G097457, PPDK2, Zm.19608 me3, NADP-ME DHLAAT, ZM/DHLAAT GRM…
			Arginine biosynthesis	17	49	0.65417	0.999997	Zm00001d028260 Zm00001d048050 Zm00001d034420 Zm00001d043382 Zm00001d017676 Zm00001d051563 Zm00001d017958 Zm00001d054079 Zm00001d051804 Zm00001d035443 Zm00001d021956 Zm00001d030557 Zm00001d051359 Zm00001d014258 Zm00001d044135 Zm00001d033328 Zm00001d018386	zma:542520 zma:542215 zma:100856888 zma:100273311 zma:100283456 zma:100284885 zma:542214 zma:100381773 zma:542401 zma:103629163 zma:103633364 zma:100193705 zma:100273023 zma:100282849 zma:103651459 zma:100191877 zma:100282625	542520 542215 100856888 100273311 100283456 100284885 542214 100381773 542401 103629163 103633364 100193705 100273023 100282849 103651459 100191877 100282625	GLN6, GS1-1, GS122 gln3, CL1911_3, CL1911_3_ov, CL1911_3b, GRMZM2G046601, GS1-5, GS117, GS1752 pco118382, GRMZM2G094712 pco121857a, GRMZM2G181273 gln4, gln1-3, gs1-3 gln5, gs1-4 GRMZM2G119583 GRMZM5G813007 GRMZM5G828630 GRMZM2G323719 uaz158(alt), GRMZM2G088064 GRMZM2G038848 GRMZM5G836910
			Tryptophan metabolism	19	55	0.663693	0.999997	Zm00001d046758 Zm00001d051754 Zm00001d025240 Zm00001d004467 Zm00001d045706 Zm00001d003947 Zm00001d027511 Zm00001d039323 Zm00001d013098 Zm00001d004287 Zm00001d008432 Zm00001d005818 Zm00001d044069 Zm00001d017352 Zm00001d034387 Zm00001d036328 Zm00001d004288 Zm00001d000116 Zm00001d008255	zma:103638801 zma:542567 zma:100383579 zma:103646858 zma:732806 zma:100383579 zma:542230 zma:103649553 zma:542229 zma:103646736 zma:100274017 zma:100282748 zma:100280444 zma:542573 zma:542228 zma:100383579 zma:103646736 zma:100281700 zma:100282971	103638801 542567 100383579 103646858 732806 100383579 542230 103649553 542229 103646736 100274017 100282748 100280444 542573 542228 100383579 103646736 100281700 100282971	GRMZM2G013956 aldh2, rf2b GRMZM2G142863 GRMZM2G141383 rf2, GRMZM2G058675 GRMZM2G142863 cat2, Cat0, Ct2, GRMZM2G090568, ncr(cat2) cl1856_1, AO2, GRMZM2G124175, GRMZM5G899851, zmAO-2 GRMZM2G050937 GRMZM5G860137 GRMZM2G130440 spi1 NIT1, GRMZM2G178517, ZmNIT1 cl1856_2(520), AO1, GRMZM2G141535, zmAO-1 GRMZM2G142863 GRMZM2G050937 GRMZM2G019515
			Terpenoid backbone biosynthesis	26	75	0.67133	0.999997	Zm00001d009431 Zm00001d027694 Zm00001d051416 Zm00001d026702 Zm00001d040163 Zm00001d047906 Zm00001d043182 Zm00001d018377 Zm00001d054008 Zm00001d018034 Zm00001d017139 Zm00001d038170 Zm00001d033945 Zm00001d011673 Zm00001d012197 Zm00001d012312 Zm00001d020963 Zm00001d008432 Zm00001d021929 Zm00001d002351 Zm00001d014369 Zm00001d044088 Zm00001d052903 Zm00001d033896 Zm00001d019060 Zm00001d038193	zma:541903 zma:100282721 zma:103653897 zma:103642227 zma:542023 zma:100282968 zma:100282760 zma:100282878 zma:100384063 zma:100283007 zma:542690 zma:606484 zma:103643980 zma:100192004 zma:103636414 zma:100284572 zma:100191922 zma:100274017 zma:100502545 zma:541974 zma:103626280 zma:100193534 zma:100280335 zma:100383164 zma:606430 zma:103630362	541903 100282721 103653897 103642227 542023 100282968 100282760 100282878 100384063 100283007 542690 606484 103643980 100192004 103636414 100284572 100191922 100274017 100502545 541974 103626280 100193534 100280335 100383164 606430 103630362	fps1, GRMZM2G168681, fps GRMZM2G163809 GRMZM2G004131 IDP154, dxr GRMZM2G030839 umc2169, GRMZM5G859195 IDP726, GRMZM2G070351 pco077228, GRMZM2G105644 pco116062, GRMZM2G137409, Hds1 dxs1, GRMZM2G137151 GRMZM2G396451 GRMZM2G147721 GRMZM2G172032 GRMZM2G146437 GRMZM2G058095 GRMZM5G860137 GRMZM2G102550 tps1, GRMZM2G049538, KS, eks1 GRMZM2G483889 GRMZM2G473976 pco067553, GRMZM2G027059, HDR GRMZM2G493395…
			Non-homologous end-joining	3	9	0.676316	0.999997	Zm00001d050612 Zm00001d044780 Zm00001d012918	zma:103653563 zma:100383279 zma:732817	103653563 100383279 732817	GRMZM5G833563 FEN1, FEN-1, GRMZM2G121262, pco066214a
			Lipoic acid metabolism	2	6	0.686902	0.999997	Zm00001d030944 Zm00001d043328	zma:100272694 zma:100384288	100272694 100384288	LIP1P-2, GRMZM2G101698
			Pyrimidine metabolism	62	176	0.687776	0.999997	Zm00001d013237 Zm00001d053070 Zm00001d037337 Zm00001d011486 Zm00001d012557 Zm00001d009888 Zm00001d036307 Zm00001d052108 Zm00001d017966 Zm00001d041620 Zm00001d013664 Zm00001d023833 Zm00001d049188 Zm00001d053118 Zm00001d008890 Zm00001d038362 Zm00001d026402 Zm00001d009631 Zm00001d040562 Zm00001d005295 Zm00001d007186 Zm00001d012857 Zm00001d046502 Zm00001d011192 Zm00001d023462 Zm00001d035916 Zm00001d0…	zma:100274213 zma:103654581 zma:100193273 zma:100281709 zma:100286230 zma:103631463 zma:845226 zma:100193828 zma:100274265 zma:100280500 zma:100284093 zma:100283790 zma:100286018 zma:100272704 zma:100279971 zma:100284489 zma:103642101 zma:100382896 zma:100193190 zma:100282883 zma:103647945 zma:100281008 zma:845224 zma:103636016 zma:100191752 zma:100281735 zma:100381602 zma:100285329 zma:845225 zm…	100274213 103654581 100193273 100281709 100286230 103631463 845226 100193828 100274265 100280500 100284093 100283790 100286018 100272704 100279971 100284489 103642101 100382896 100193190 100282883 103647945 100281008 845224 103636016 100191752 100281735 100381602 100285329 845225 100382896 100280755 100281709 100279825 103651512 100282859 100283855 100273224 100273931 100217180 100193764 10363198…	GRMZM2G155546 GRMZM2G132547 rpoC1, ZemaCp014 pco123975 cl32009_1b, GRMZM2G181505 pco072227, GRMZM2G157310 GRMZM2G013478 umc1821 GRMZM5G889769 GRMZM2G005536, GRMZM2G148626 gpm9, GRMZM2G059121 GRMZM2G480171 umc1385 cl17080_1 IDP825, GRMZM5G874167 GRMZM2G003331 pco144871, GRMZM2G034326 rpoA, ZemaCp054 GRMZM2G700683 GRMZM2G130351 uck1, GRMZM2G141009 GRMZM2G134797 GRMZM5G898768 rpoB, ZemaCp013 umc1385…
			Purine metabolism	80	227	0.704594	0.999997	Zm00001d007656 Zm00001d018961 Zm00001d013237 Zm00001d053070 Zm00001d037337 Zm00001d012557 Zm00001d009888 Zm00001d026402 Zm00001d036307 Zm00001d026619 Zm00001d047603 Zm00001d009774 Zm00001d013664 Zm00001d023833 Zm00001d008890 Zm00001d017238 Zm00001d033775 Zm00001d048785 Zm00001d024423 Zm00001d050150 Zm00001d005295 Zm00001d007186 Zm00001d012857 Zm00001d046502 GRMZM5G879235 Zm00001d023462 Zm00001d02…	zma:103649453 zma:100193244 zma:100274213 zma:103654581 zma:100193273 zma:100286230 zma:103631463 zma:103642101 zma:845226 zma:542177 zma:100217081 zma:100283650 zma:100284093 zma:100283790 zma:100279971 zma:100274213 zma:103648345 zma:100276991 zma:103642510 zma:100382527 zma:100282883 zma:103647945 zma:100281008 zma:845224 zma:845224 zma:100191752 zma:103641146 zma:542358 zma:100381602 zma:1002…	103649453 100193244 100274213 103654581 100193273 100286230 103631463 103642101 845226 542177 100217081 100283650 100284093 100283790 100279971 100274213 103648345 100276991 103642510 100382527 100282883 103647945 100281008 845224 845224 100191752 103641146 542358 100381602 100285329 100384368 100217102 845225 100502295 100281242 100276991 100280755 100281060 100279825 100283207 100282568 1002838…	IDP1624, GRMZM2G066290 GRMZM2G155546 GRMZM2G480171 rpoC1, ZemaCp014 PK GRMZM5G895991 pco069028, GRMZM2G125893 pco072227, GRMZM2G157310 GRMZM2G013478 GRMZM2G005536, GRMZM2G148626 GRMZM2G045049 GRMZM5G895554 IDP825, GRMZM5G874167 GRMZM2G003331 pco144871, GRMZM2G034326 rpoA, ZemaCp054 rpoA, ZemaCp054 GRMZM2G130351 GRMZM2G368902 GRMZM2G023289 GRMZM2G134797 GRMZM5G898768 GRMZM2G050984 GRMZM2G327406, a…
			Glycerophospholipid metabolism	45	130	0.705398	0.999997	Zm00001d030117 Zm00001d038620 Zm00001d042152 Zm00001d035471 Zm00001d020612 Zm00001d038891 Zm00001d043207 Zm00001d014425 Zm00001d013014 Zm00001d033683 Zm00001d033187 Zm00001d043652 Zm00001d038366 Zm00001d005770 Zm00001d024343 Zm00001d046508 Zm00001d014984 Zm00001d040076 Zm00001d010520 Zm00001d001903 Zm00001d048766 Zm00001d019218 Zm00001d034875 Zm00001d010670 Zm00001d034714 Zm00001d039653 Zm00001d0…	zma:103637735 zma:100285585 zma:100273469 zma:100285723 zma:100193605 zma:100383478 zma:100216900 zma:100285746 zma:100382466 zma:100191566 zma:100283806 zma:100286064 zma:100191740 zma:103647433 zma:103654297 zma:100279815 zma:100281051 zma:100216715 zma:100280283 zma:100285641 zma:100282234 zma:100383152 zma:103644330 zma:100191807 zma:100285723 zma:100283662 zma:103655222 zma:100273065 zma:100…	103637735 100285585 100273469 100285723 100193605 100383478 100216900 100285746 100382466 100191566 100283806 100286064 100191740 103647433 103654297 100279815 100281051 100216715 100280283 100285641 100282234 100383152 103644330 100191807 100285723 100283662 103655222 100273065 100282545 100501678 103635415 103647629 103647285 103653268 103650549 100192922 103627540 100279857 100280012 100127508…	GRMZM2G014981 GRMZM2G155348 AY110160, GRMZM2G139041 pco063192, GRMZM2G469409 GRMZM2G170400 GRMZM2G349603 AY110479 si605064b07, GRMZM2G058227 umc1286 GRMZM2G059637 GRMZM2G159125 GRMZM2G020320 GRMZM2G110834 GRMZM2G166176 GRMZM2G064967 GRMZM2G063258 GRMZM2G422670 GRMZM2G173195 AY110160, GRMZM2G139041 GRMZM5G830695 GRMZM2G131378 GRMZM2G090747 pco129777b, GRMZM2G060886 GRMZM2G015692 GRMZM2G108912 GRMZ…
			Biotin metabolism	9	28	0.714829	0.999997	Zm00001d049975 Zm00001d037108 Zm00001d000180 Zm00001d047255 Zm00001d022144 Zm00001d025201 Zm00001d024159 Zm00001d006866 Zm00001d026689	zma:100193519 zma:100279917 zma:100191565 zma:100383498 zma:100193451 zma:100273168 zma:100382888 zma:100193451 zma:100191565	100193519 100279917 100191565 100383498 100193451 100273168 100382888 100193451 100191565	gpm519, GRMZM2G070422 cl1004_1, GRMZM2G110932 csu43 pco121523, GRMZM2G124335 fab1 si683027d02(142), GRMZM2G102156 pco121523, GRMZM2G124335 cl1004_1, GRMZM2G110932
			Brassinosteroid biosynthesis	4	13	0.722178	0.999997	Zm00001d015721 Zm00001d022351 Zm00001d028325 Zm00001d052475	zma:103626790 zma:103634425 zma:100217085 zma:100272666	103626790 103634425 100217085 100272666	GRMZM2G045319 GRMZM2G019666 GRMZM2G107199 umc1612
			beta-Alanine metabolism	18	55	0.732735	0.999997	Zm00001d051754 Zm00001d001883 Zm00001d047981 Zm00001d003531 Zm00001d015026 Zm00001d045706 Zm00001d003522 Zm00001d019054 Zm00001d046112 Zm00001d017966 Zm00001d031749 Zm00001d003309 Zm00001d005818 Zm00001d043681 Zm00001d026586 Zm00001d024281 Zm00001d000116 Zm00001d005159	zma:542567 zma:100191603 zma:100381655 zma:100284551 zma:100282933 zma:732806 zma:100273302 zma:100274311 zma:732743 zma:100274265 zma:100501579 zma:100383438 zma:100282748 zma:100383200 zma:100384522 zma:541983 zma:100281700 zma:100282908	542567 100191603 100381655 100284551 100282933 732806 100273302 100274311 732743 100274265 100501579 100383438 100282748 100383200 100384522 541983 100281700 100282908	aldh2, rf2b pco077065, GRMZM2G078033 GRMZM2G098875 pco117429, GRMZM2G101069 rf2, GRMZM2G058675 GRMZM2G355906 pco061337, GRMZM2G001898, GRMZM2G108076 spesyn, GRMZM2G047867, spds2 cl32009_1b, GRMZM2G181505 pco118120, GRMZM2G147884 GRMZM2G130440 GRMZM2G035994 TIDP3366, GRMZM2G150248 pao1, GRMZM2G034152, PAO, mpao1 pco075678, GRMZM2G064163
			Protein export	25	76	0.749193	0.999997	Zm00001d048028 Zm00001d012652 Zm00001d034823 Zm00001d027293 Zm00001d034805 Zm00001d008625 Zm00001d020694 Zm00001d026521 Zm00001d026703 Zm00001d039852 Zm00001d042044 Zm00001d040686 Zm00001d033317 Zm00001d025144 Zm00001d036708 Zm00001d000350 Zm00001d000349 Zm00001d004119 Zm00001d028272 Zm00001d004417 Zm00001d023431 Zm00001d012861 Zm00001d016036 Zm00001d004707 Zm00001d052556	zma:100279882 zma:100274376 zma:103625721 zma:100191673 zma:100286182 zma:100285911 zma:100283156 zma:100280858 zma:100273277 zma:100284226 zma:542753 zma:542347 zma:541788 zma:100384319 zma:100280916 zma:542482 zma:542482 zma:100384319 zma:100279882 zma:100273900 zma:100274153 zma:103625721 zma:103626952 zma:103648919 zma:103654352	100279882 100274376 103625721 100191673 100286182 100285911 100283156 100280858 100273277 100284226 542753 542347 541788 100384319 100280916 542482 542482 100384319 100279882 100273900 100274153 103625721 103626952 103648919 103654352	GRMZM2G093254 GRMZM2G079257 GRMZM2G136854 spr1, GRMZM2G060296 pco111827 pco148010, GRMZM2G110063 pco112007, GRMZM2G024865 GRMZM5G800751 csr1 tha1 tha4, GRMZM2G472651, TATA GRMZM2G089491 csy1, GRMZM5G809546, SECY csy1, GRMZM5G809546, SECY GRMZM2G093254 GRMZM2G029141 si496035e06, GRMZM2G113093 GRMZM2G136854 GRMZM2G039930 GRMZM2G090020, GRMZM2G090086
			Pentose and glucuronate interconversions	25	76	0.749193	0.999997	Zm00001d051754 Zm00001d043509 Zm00001d042556 Zm00001d012595 Zm00001d027841 Zm00001d045706 Zm00001d038794 Zm00001d042946 Zm00001d033188 Zm00001d036945 Zm00001d031727 Zm00001d022104 Zm00001d040649 Zm00001d034072 Zm00001d010793 Zm00001d012766 Zm00001d014674 Zm00001d000116 Zm00001d021421 Zm00001d007113 Zm00001d048324 Zm00001d040650 Zm00001d032806 Zm00001d008334 Zm00001d006929	zma:542567 zma:100381490 zma:100273291 zma:103636583 zma:100274365 zma:732806 zma:103630641 zma:103652411 zma:100285497 zma:100284356 zma:100283066 zma:103633411 zma:103650113 zma:100279549 zma:103635870 zma:100381490 zma:100382378 zma:100281700 zma:100191846 zma:100194385 zma:100282201 zma:100280285 zma:100281581 zma:100191701 zma:100282641	542567 100381490 100273291 103636583 100274365 732806 103630641 103652411 100285497 100284356 100283066 103633411 103650113 100279549 103635870 100381490 100382378 100281700 100191846 100194385 100282201 100280285 100281581 100191701 100282641	aldh2, rf2b GRMZM2G177940 GRMZM2G026855 GRMZM2G139396 GRMZM2G026807 rf2, GRMZM2G058675 GRMZM2G043943 GRMZM2G129635 sdh1, GRMZM2G175423 GRMZM2G037411 TIDP3299, GRMZM2G328500 GRMZM2G071339 GRMZM2G177940 GRMZM2G116586 csu815, GRMZM2G032003 GRMZM2G005493 GRMZM2G178960 GRMZM2G136106 GRMZM2G472060 GRMZM2G017555 GRMZM2G141510
			Fatty acid elongation	14	45	0.772756	0.999997	Zm00001d026144 Zm00001d010536 Zm00001d017941 Zm00001d039856 Zm00001d027904 Zm00001d030343 Zm00001d045660 Zm00001d027766 Zm00001d009354 Zm00001d018847 Zm00001d017111 Zm00001d009608 Zm00001d039053 Zm00001d050992	zma:100273486 zma:100284318 zma:100279934 zma:100274548 zma:100283031 zma:103633519 zma:103638222 zma:103631752 zma:100501899 zma:103633692 zma:542359 zma:100191621 zma:100191621 zma:103653730	100273486 100284318 100279934 100274548 100283031 103633519 103638222 103631752 100501899 103633692 542359 100191621 100191621 103653730	cl483_1, GRMZM2G344476 cl20712_1(629), GRMZM2G035202 GRMZM2G151087 pco065510b, GRMZM2G445602 GRMZM2G149636 GRMZM2G168956 GRMZM2G031790 GRMZM2G073929 gl8 pco084555(107), GRMZM2G393897 pco084555(107), GRMZM2G393897 gl8b
			Diterpenoid biosynthesis	9	30	0.775279	0.999997	Zm00001d037724 Zm00001d032961 Zm00001d047830 Zm00001d041082 Zm00001d029648 Zm00001d039634 Zm00001d046342 Zm00001d002349 Zm00001d024512	zma:100280480 zma:542165 zma:103639316 zma:100279558 zma:542165 zma:101202726 zma:103638615 zma:103645955 zma:103641248	100280480 542165 103639316 100279558 542165 101202726 103638615 103645955 103641248	GRMZM2G051619 an2, GRMZM2G044481 GRMZM2G089803 an2, GRMZM2G044481 D1, GRMZM2G036340 GRMZM2G161472 GRMZM2G093603 GRMZM2G068808
			Oxidative phosphorylation	57	170	0.78976	0.999997	Zm00001d052242 Zm00001d031309 Zm00001d031308 Zm00001d046336 GRMZM5G874448 GRMZM5G800101 Zm00001d021721 Zm00001d045139 Zm00001d043618 Zm00001d043619 GRMZM5G853723 Zm00001d002006 Zm00001d018197 Zm00001d039157 Zm00001d014199 Zm00001d049649 Zm00001d044459 Zm00001d030080 GRMZM5G866223 Zm00001d006402 Zm00001d046560 Zm00001d015426 Zm00001d019605 Zm00001d019062 Zm00001d009222 GRMZM5G835775 GRMZM5G800980 …	zma:100281924 zma:100192499 zma:100192499 zma:100286306 zma:845179 zma:845180 zma:100280574 zma:101027208 zma:100282853 zma:100192583 zma:845187 zma:542048 zma:100272927 zma:100281241 zma:103626225 zma:100216648 zma:103651601 zma:100276847 zma:845188 zma:845170 zma:103638716 zma:103626681 zma:845186 zma:100502231 zma:103635138 zma:845184 zma:845190 zma:100502233 zma:845180 zma:541666 zma:845174 z…	100281924 100192499 100192499 100286306 845179 845180 100280574 101027208 100282853 100192583 845187 542048 100272927 100281241 103626225 100216648 103651601 100276847 845188 845170 103638716 103626681 845186 100502231 103635138 845184 845190 100502233 845180 541666 845174 845170 103639351 100281877 101027208 542589 100285442 100282566 845183 845187 845185 100283351 100502231 100502231 100383920 …	GRMZM2G094497, vpp2 ndhA, ndh1, ZemaCp091 ndhB, ndh2, ZemaCp101 GRMZM2G019999 GRMZM2G148200 cl48463_1 GRMZM2G069061 ndhH, ZemaCp092 mha2, GRMZM2G019404 ppp1, GRMZM2G090718 pco086635(414), GRMZM2G144372 GRMZM2G015418 csu474(rpS14), GRMZM2G134134 GRMZM2G456603 ndhI, frxB, ZemaCp090 atpB, ZemaCp031 GRMZM2G131309 GRMZM2G128877 ndhG, ZemaCp089 GRMZM2G035542 ndhE, ndh4L, ZemaCp088 ndhK, ZemaCp028 GRMZM…
			Fructose and mannose metabolism	31	96	0.794176	0.999997	Zm00001d045326 Zm00001d012103 Zm00001d028572 Zm00001d021310 Zm00001d043443 Zm00001d037278 Zm00001d053015 Zm00001d028562 Zm00001d042727 Zm00001d043563 Zm00001d048907 Zm00001d012407 Zm00001d045919 Zm00001d043965 Zm00001d035037 Zm00001d036091 Zm00001d048126 Zm00001d008491 Zm00001d010796 Zm00001d017830 Zm00001d031727 Zm00001d007113 Zm00001d039499 Zm00001d039865 Zm00001d033002 Zm00001d023559 Zm00001d0…	zma:100285548 zma:100272913 zma:100274383 zma:100191222 zma:100191416 zma:100382182 zma:100272845 zma:100284339 zma:100273700 zma:100281464 zma:100281365 zma:100280823 zma:101027252 zma:100279398 zma:542108 zma:100282677 zma:100191571 zma:100502020 zma:542510 zma:100193340 zma:100283066 zma:100194385 zma:100857010 zma:100272481 zma:100280694 zma:100273196 zma:103632535 zma:103628997 zma:100191982…	100285548 100272913 100274383 100191222 100191416 100382182 100272845 100284339 100273700 100281464 100281365 100280823 101027252 100279398 542108 100282677 100191571 100502020 542510 100193340 100283066 100194385 100857010 100272481 100280694 100273196 103632535 103628997 100191982 100191851 103642929	GRMZM2G160506 GRMZM5G852968 AY107018, GRMZM2G140201 GRMZM2G059151 AY110170, GRMZM2G155253 pco073762 GRMZM5G879882 TIDP2936 GRMZM2G146206 GRMZM2G314094 frk2, GRMZM2G051677 GRMZM2G074850 GRMZM2G178254 GRMZM2G069195 pco074668, GRMZM2G058745 pco110217, GRMZM2G123371 sdh1, GRMZM2G175423 GRMZM2G005493 GRMZM2G132069 TIM, GRMZM2G030784 GRMZM2G009591 IDP1438 GRMZM2G409131 GRMZM2G450163
			Riboflavin metabolism	4	15	0.803809	0.999997	Zm00001d010535 Zm00001d050844 Zm00001d002034 Zm00001d027367	zma:100282823 zma:100383821 zma:100192579 zma:100191772	100282823 100383821 100192579 100191772	GRMZM2G336908 GRMZM2G033219 PYRD, GRMZM2G320099
			Histidine metabolism	8	28	0.805235	0.999997	Zm00001d051754 Zm00001d005818 Zm00001d045706 Zm00001d000116 Zm00001d016720 Zm00001d038142 Zm00001d034343 Zm00001d020908	zma:542567 zma:100282748 zma:732806 zma:100281700 zma:103627258 zma:100284229 zma:100284964 zma:100193253	542567 100282748 732806 100281700 103627258 100284229 100284964 100193253	aldh2, rf2b GRMZM2G130440 rf2, GRMZM2G058675 GRMZM2G451314 pco071947(363), GRMZM2G022252 pco067414 GRMZM2G068862
			Citrate cycle (TCA cycle)	31	98	0.822693	0.999997	Zm00001d009127 Zm00001d015497 Zm00001d014030 Zm00001d036328 Zm00001d053684 Zm00001d027558 Zm00001d004564 Zm00001d025240 Zm00001d049649 Zm00001d016365 Zm00001d052289 Zm00001d034241 Zm00001d022229 Zm00001d024952 Zm00001d023606 Zm00001d003923 Zm00001d035136 Zm00001d017258 Zm00001d003947 Zm00001d041593 Zm00001d032224 Zm00001d003083 Zm00001d047893 Zm00001d013966 Zm00001d015856 Zm00001d009212 Zm00001d0…	zma:103635086 zma:103646899 zma:100280767 zma:100383579 zma:100194338 zma:100304277 zma:103646899 zma:100383579 zma:100216648 zma:541781 zma:732791 zma:100282134 zma:107305678 zma:100281040 zma:100274483 zma:100284269 zma:100502233 zma:100284286 zma:100383579 zma:100282948 zma:100272519 zma:100191657 zma:100279748 zma:100283351 zma:100282691 zma:100381818 zma:100216599 zma:100284286 zma:103647708…	103635086 103646899 100280767 100383579 100194338 100304277 103646899 100383579 100216648 541781 732791 100282134 107305678 100281040 100274483 100284269 100502233 100284286 100383579 100282948 100272519 100191657 100279748 100283351 100282691 100381818 100216599 100284286 103647708 541622 100216609	GRMZM2G002416 GRMZM2G467338 GRMZM2G142863 cl5118_1 IDP553, GRMZM2G176397 GRMZM2G467338 GRMZM2G142863 csu474(rpS14), GRMZM2G134134 GRMZM2G015132 pdh1 GRMZM2G072744 aco2, GRMZM5G858454 DHLAAT, ZM/DHLAAT GRMZM5G807639 GRMZM2G302259 GRMZM2G142863 pco080711, GRMZM2G034083 GRMZM2G058702 GRMZM2G082581 pck2, GRMZM5G870932 GRMZM2G039542 GRMZM2G145595 GRMZM2G171707 GRMZM2G001696 GRMZM2G072054
			Regulation of autophagy	15	53	0.866164	0.999997	Zm00001d053173 Zm00001d012697 Zm00001d042303 Zm00001d021806 Zm00001d011914 Zm00001d020496 Zm00001d038745 Zm00001d043389 Zm00001d038690 Zm00001d000178 Zm00001d026335 Zm00001d026641 Zm00001d040567 Zm00001d029075 Zm00001d052028	zma:103654631 zma:103636631 zma:732797 zma:103634395 zma:103637461 zma:100284454 zma:100192108 zma:541785 zma:100280653 zma:100240689 zma:100240695 zma:100240690 zma:100037796 zma:100280494 zma:103654173	103654631 103636631 732797 103634395 103637461 100284454 100192108 541785 100280653 100240689 100240695 100240690 100037796 100280494 103654173	GRMZM2G136400 atg6, GRMZM2G092112 GRMZM2G062651 GRMZM2G129018 pk4, ZmPK4 GRMZM2G176519 pco096794a, ATG3, GRMZM5G818887 IDP1471, Atg8b, GRMZM2G419694 Atg4a, GRMZM2G064212, GRMZM2G458441 cl63836_1, GRMZM2G044038
			RNA polymerase	16	57	0.878718	0.999997	Zm00001d029055 Zm00001d013237 Zm00001d046502 Zm00001d005295 Zm00001d035960 Zm00001d012557 Zm00001d012857 Zm00001d036307 Zm00001d042567 Zm00001d003203 Zm00001d022141 Zm00001d017238 Zm00001d000270 GRMZM5G899366 GRMZM5G879235 GRMZM5G877454	zma:100279825 zma:100274213 zma:845224 zma:100282883 zma:103629391 zma:100286230 zma:100281008 zma:845226 zma:100193764 zma:103646285 zma:100285329 zma:100274213 zma:845225 zma:845226 zma:845224 zma:845225	100279825 100274213 845224 100282883 103629391 100286230 100281008 845226 100193764 103646285 100285329 100274213 845225 845226 845224 845225	GRMZM2G028132, GRMZM2G043456 rpoA, ZemaCp054 IDP825, GRMZM5G874167 pco144871, GRMZM2G034326 rpoC1, ZemaCp014 pco092373(578), GRMZM2G006453 GRMZM2G080176, GRMZM2G178236 GRMZM5G898768 rpoB, ZemaCp013 rpoC1, ZemaCp014 rpoA, ZemaCp054 rpoB, ZemaCp013
			Synthesis and degradation of ketone bodies	2	10	0.879591	0.999997	Zm00001d052444 Zm00001d008432	zma:100283677 zma:100274017	100283677 100274017	cl173_1a, GRMZM2G095141 GRMZM5G860137
			Valine, leucine and isoleucine degradation	19	67	0.88709	0.999997	Zm00001d018487 Zm00001d023694 Zm00001d007892 Zm00001d029848 Zm00001d029083 Zm00001d005818 Zm00001d010970 Zm00001d045706 Zm00001d000116 Zm00001d050336 Zm00001d019054 Zm00001d052444 Zm00001d038453 Zm00001d008432 Zm00001d009212 Zm00001d043951 Zm00001d040670 Zm00001d031013 Zm00001d051754	zma:100192501 zma:100191513 zma:100273293 zma:100191754 zma:100501001 zma:100282748 zma:100382372 zma:732806 zma:100281700 zma:100281617 zma:100274311 zma:100283677 zma:100384690 zma:100274017 zma:100381818 zma:100384690 zma:100283617 zma:100280665 zma:542567	100192501 100191513 100273293 100191754 100501001 100282748 100382372 732806 100281700 100281617 100274311 100283677 100384690 100274017 100381818 100384690 100283617 100280665 542567	GRMZM5G848768 pco079304 pco118301, GRMZM2G037614 pco098993(576), GRMZM2G071208 GRMZM2G130440 GRMZM2G052630 rf2, GRMZM2G058675 pco103496(377) pco061337, GRMZM2G001898, GRMZM2G108076 cl173_1a, GRMZM2G095141 GRMZM2G107739 GRMZM5G860137 GRMZM2G145595 GRMZM2G107739 GRMZM2G033644 aldh2, rf2b
			Folate biosynthesis	5	22	0.896472	0.999997	Zm00001d048514 Zm00001d031995 Zm00001d049188 Zm00001d016866 Zm00001d039264	zma:100285702 zma:100280848 zma:100286018 zma:100272516 zma:100192017	100285702 100280848 100286018 100272516 100192017	GRMZM5G869779 umc1821 GRMZM2G135816 cl315_1
			Pantothenate and CoA biosynthesis	8	34	0.919384	0.999997	Zm00001d018946 Zm00001d029848 Zm00001d044035 Zm00001d007288 Zm00001d017966 Zm00001d049929 Zm00001d017168 Zm00001d052437	zma:100282565 zma:100191754 zma:100193695 zma:100279727 zma:100274265 zma:100384514 zma:100381801 zma:103655790	100282565 100191754 100193695 100279727 100274265 100384514 100381801 103655790	pco122135, GRMZM2G071294 pco098993(576), GRMZM2G071208 GRMZM2G004382 GRMZM2G077215 cl32009_1b, GRMZM2G181505 GRMZM2G007647
			SNARE interactions in vesicular transport	13	51	0.921719	0.999997	Zm00001d002148 Zm00001d005751 Zm00001d034899 Zm00001d033058 Zm00001d038931 Zm00001d037483 Zm00001d013323 Zm00001d021913 Zm00001d043700 Zm00001d040286 Zm00001d026122 Zm00001d025915 Zm00001d008333	zma:100193337 zma:100282420 zma:103644161 zma:100284137 zma:100283631 zma:100272623 zma:103625904 zma:100276126 zma:100280807 zma:100191223 zma:100193453 zma:100280225 zma:100191223	100193337 100282420 103644161 100284137 100283631 100272623 103625904 100276126 100280807 100191223 100193453 100280225 100191223	GRMZM2G059106 GRMZM2G120596 GRMZM2G139744 pco100771, GRMZM2G057251 GRMZM2G027019 GRMZM2G100478 pco146901, GRMZM2G063420 GRMZM2G111611 GRMZM2G017329 pco135291a, GRMZM2G003124 GRMZM2G040902 GRMZM2G017329
			Phosphatidylinositol signaling system	28	99	0.92555	0.999997	Zm00001d037332 Zm00001d010649 Zm00001d035004 Zm00001d013442 Zm00001d008278 Zm00001d013469 Zm00001d013393 Zm00001d005059 Zm00001d033853 Zm00001d043144 Zm00001d016470 Zm00001d030083 Zm00001d028746 Zm00001d047447 Zm00001d022391 Zm00001d014906 Zm00001d053801 Zm00001d050089 Zm00001d020414 Zm00001d029209 Zm00001d049076 Zm00001d032539 Zm00001d033551 Zm00001d030194 Zm00001d023698 Zm00001d024212 Zm00001d0…	zma:103643294 zma:103635808 zma:103628939 zma:103625953 zma:100381297 zma:100216938 zma:103627995 zma:103647156 zma:100194132 zma:100502442 zma:103627151 zma:732818 zma:100191466 zma:100191466 zma:100381628 zma:103626494 zma:100384405 zma:103653328 zma:103632727 zma:103635048 zma:103652867 zma:103643394 zma:103645542 zma:100282992 zma:542492 zma:100127508 zma:100281652 zma:100283131	103643294 103635808 103628939 103625953 100381297 100216938 103627995 103647156 100194132 100502442 103627151 732818 100191466 100191466 100381628 103626494 100384405 103653328 103632727 103635048 103652867 103643394 103645542 100282992 542492 100127508 100281652 100283131	GRMZM2G092595 GRMZM2G005557 GRMZM2G040296 GRMZM2G114162 GRMZM2G157147 GRMZM2G084609 lpa2, GRMZM2G456626, ITPK1 GRMZM2G114354 GRMZM2G114354 GRMZM2G036113 GRMZM2G137435 PCO088312 GRMZM2G066876 GRMZM5G831486 GRMZM2G176698 GRMZM2G374973 GRMZM2G022997, GRMZM2G101856 si618046c10b, GRMZM2G149903 dnp1, DP1, GRMZM2G152757 pco106687 cl27615_1, GRMZM2G076392
			DNA replication	35	122	0.93505	0.999997	Zm00001d043835 Zm00001d043540 Zm00001d038467 Zm00001d050437 Zm00001d051995 Zm00001d053070 Zm00001d034399 Zm00001d037781 Zm00001d049190 Zm00001d008890 Zm00001d026402 Zm00001d010406 Zm00001d008342 Zm00001d023462 Zm00001d012918 Zm00001d009888 Zm00001d052113 Zm00001d041606 Zm00001d024509 Zm00001d016581 Zm00001d007500 Zm00001d042713 Zm00001d010611 Zm00001d028210 Zm00001d044540 Zm00001d030614 Zm00001d0…	zma:103651343 zma:100502363 zma:542738 zma:103653487 zma:542357 zma:103654581 zma:100193357 zma:100279753 zma:100501077 zma:100279971 zma:103642101 zma:100279753 zma:100285910 zma:100191752 zma:732817 zma:103631463 zma:100383373 zma:542504 zma:100280534 zma:103627197 zma:103648088 zma:100194009 zma:542738 zma:100280726 zma:100281587 zma:542504 zma:100275043 zma:100280690 zma:103642510 zma:1002722…	103651343 100502363 542738 103653487 542357 103654581 100193357 100279753 100501077 100279971 103642101 100279753 100285910 100191752 732817 103631463 100383373 542504 100280534 103627197 103648088 100194009 542738 100280726 100281587 542504 100275043 100280690 103642510 100272286 100273584 100285886 100280690 100383139 100304310	GRMZM2G330229 ROA2, ROA-1, ROA1 magi81248, GRMZM2G108712, ZmPCNA2, pcna2 pco093185f GRMZM2G062333 GRMZM2G005536, GRMZM2G148626 GRMZM2G480171 GRMZM2G062333 GRMZM2G154896 GRMZM2G130351 FEN1, FEN-1, GRMZM2G121262, pco066214a MCM7, GRMZM2G065205 GRMZM2G369260 GRMZM2G011631, GRMZM2G426847 GRMZM2G457381 ROA2, ROA-1, ROA1 cl11267_1, GRMZM2G098714 MCM7, GRMZM2G065205 TIDP3662, GRMZM2G005998 GRMZM2G154267…
			Endocytosis	80	270	0.974828	0.999997	Zm00001d034492 Zm00001d047020 Zm00001d000202 Zm00001d043813 Zm00001d051676 Zm00001d011095 Zm00001d046599 Zm00001d032591 Zm00001d013469 Zm00001d053688 Zm00001d046313 Zm00001d013059 Zm00001d034803 Zm00001d012420 Zm00001d044480 Zm00001d042922 Zm00001d043997 Zm00001d038842 Zm00001d030725 Zm00001d009964 Zm00001d005770 Zm00001d028457 Zm00001d018567 Zm00001d040202 Zm00001d047092 Zm00001d048687 Zm00001d0…	zma:100285267 zma:100283451 zma:100284170 zma:100273933 zma:100272989 zma:100284711 zma:542116 zma:100383198 zma:100216938 zma:103654846 zma:100283582 zma:100279276 zma:103644311 zma:100501536 zma:100191382 zma:103651028 zma:100856904 zma:103630662 zma:103639924 zma:100282310 zma:103647433 zma:100272449 zma:100304271 zma:100273036 zma:103637660 zma:103652717 zma:100191606 zma:100272989 zma:103638…	100285267 100283451 100284170 100273933 100272989 100284711 542116 100383198 100216938 103654846 100283582 100279276 103644311 100501536 100191382 103651028 100856904 103630662 103639924 100282310 103647433 100272449 100304271 100273036 103637660 103652717 100191606 100272989 103638323 103650526 103635525 100283490 100381628 103632959 100857099 100381421 100216677 100272423 100193501 100280562 10…	GRMZM2G134045 GRMZM2G046676 GRMZM2G020034 GRMZM2G126946 Sal1, GRMZM2G117935 GRMZM2G082529 GRMZM2G157147 pco068021(435), GRMZM2G018619 pco085879, GRMZM5G844195 GRMZM2G090034 GRMZM2G056039 umc1314, GRMZM2G061912 GRMZM2G159125 GRMZM2G147579 pco100749b, PCO100749_ov, pco100749(210) GRMZM2G082916 HSP70 GRMZM2G176612 GRMZM2G126946 GRMZM2G047178 hsp70-4 GRMZM2G062042 GRMZM2G075690 GRMZM2G036113 GRMZM2G0…
			mRNA surveillance pathway	49	179	0.981489	0.999997	Zm00001d010901 Zm00001d051898 Zm00001d011885 Zm00001d000023 Zm00001d053565 Zm00001d047794 Zm00001d039625 Zm00001d014378 Zm00001d044552 Zm00001d021413 Zm00001d050357 Zm00001d047191 Zm00001d021950 Zm00001d005502 Zm00001d032708 Zm00001d038877 Zm00001d018112 Zm00001d005276 Zm00001d048336 Zm00001d033646 Zm00001d044393 Zm00001d046255 Zm00001d050266 Zm00001d022535 Zm00001d009500 Zm00001d024964 Zm00001d0…	zma:100283928 zma:542269 zma:100193201 zma:100280286 zma:100193694 zma:100272743 zma:100273799 zma:103629640 zma:100285191 zma:100283032 zma:100280157 zma:103635858 zma:100279976 zma:100278146 zma:103643458 zma:100285923 zma:100194063 zma:100381531 zma:100191189 zma:100283191 zma:100383125 zma:100382126 zma:100304199 zma:100274408 zma:100279581 zma:100383125 zma:100384700 zma:100273717 zma:100272…	100283928 542269 100193201 100280286 100193694 100272743 100273799 103629640 100285191 100283032 100280157 103635858 100279976 100278146 103643458 100285923 100194063 100381531 100191189 100283191 100383125 100382126 100304199 100274408 100279581 100383125 100384700 100273717 100272981 100280371 100282115 100282594 100282304 103641974 100382683 103647628 100282980 100283795 103627442 100278777 10…	pco106378a prh1, GRMZM2G112240, PP1, ZmPP1 GRMZM2G060977 GRMZM2G012761 si946052g10b, GRMZM2G166780 si687042f02, GRMZM2G028637 GRMZM2G049027 IDP798 GRMZM2G171921 GRMZM2G113139 pco083367(678), GRMZM2G022313 GRMZM2G018775, pco062669 GRMZM2G148323 GRMZM2G079723 cl6587_1 pco105718, GRMZM2G420926 GRMZM5G810275 IDP301, GRMZM2G142334 GRMZM2G109009 GRMZM2G470461 GRMZM2G013465 IDP301, GRMZM2G142334 GRMZM2G…
			N-Glycan biosynthesis	11	55	0.984891	0.999997	Zm00001d005248 Zm00001d002944 Zm00001d002388 Zm00001d001846 Zm00001d026607 Zm00001d043441 Zm00001d015249 Zm00001d039403 Zm00001d002499 Zm00001d042398 Zm00001d038804	zma:100191802 zma:100282884 zma:100502479 zma:100382512 zma:100192699 zma:100279881 zma:103626608 zma:100282615 zma:100279297 zma:100273881 zma:100279881	100191802 100282884 100502479 100382512 100192699 100279881 103626608 100282615 100279297 100273881 100279881	GRMZM2G051367 umc2627, GRMZM2G177273 GRMZM2G130889 GRMZM2G044096 GRMZM2G040876 GRMZM2G154165 GRMZM2G133048 cl19880_1, GRMZM2G051262 csu425(gct), GRMZM2G092190 GRMZM2G154165
			Glycosylphosphatidylinositol(GPI)-anchor biosynthesis	4	28	0.987118	0.999997	Zm00001d027485 Zm00001d039727 Zm00001d029333 Zm00001d047181	zma:100280817 zma:100278194 zma:100216561 zma:100273831	100280817 100278194 100216561 100273831	si605086d03 GRMZM5G815369 GRMZM2G098079
			Nucleotide excision repair	31	125	0.987228	0.999997	Zm00001d032439 Zm00001d043835 Zm00001d040203 Zm00001d038109 Zm00001d050437 Zm00001d051995 Zm00001d053070 Zm00001d034399 Zm00001d043540 Zm00001d008890 Zm00001d026402 Zm00001d045665 Zm00001d001809 Zm00001d008597 Zm00001d033928 Zm00001d052113 Zm00001d037326 Zm00001d008342 Zm00001d024509 Zm00001d016581 Zm00001d007500 Zm00001d009745 Zm00001d028210 Zm00001d020419 Zm00001d024423 Zm00001d018531 Zm00001d0…	zma:100192592 zma:103651343 zma:103649923 zma:100273893 zma:103653487 zma:542357 zma:103654581 zma:100193357 zma:100502363 zma:100279971 zma:103642101 zma:100274222 zma:103645755 zma:100381699 zma:100283483 zma:100383373 zma:100282762 zma:100285910 zma:100280534 zma:103627197 zma:103648088 zma:103635427 zma:100280726 zma:100283179 zma:103642510 zma:100272286 zma:100273584 zma:103651319 zma:100280…	100192592 103651343 103649923 100273893 103653487 542357 103654581 100193357 100502363 100279971 103642101 100274222 103645755 100381699 100283483 100383373 100282762 100285910 100280534 103627197 103648088 103635427 100280726 100283179 103642510 100272286 100273584 103651319 100280690 100280690 100192883	GRMZM2G145879 magi81248, GRMZM2G108712, ZmPCNA2, pcna2 pco093185f GRMZM2G330229 GRMZM2G005536, GRMZM2G148626 GRMZM2G480171 GRMZM2G147854 GRMZM2G126956 pco103361, GRMZM2G361662 pco142081 GRMZM2G154896 GRMZM2G369260 GRMZM2G011631, GRMZM2G426847 GRMZM2G457381 GRMZM2G356142, GRMZM2G430027 cl11267_1, GRMZM2G098714 pco104381(507), GRMZM2G105772 pco076382, GRMZM2G445958 GRMZM2G086934 GRMZM2G154267 GRMZM…
			Phagosome	38	149	0.988798	0.999997	Zm00001d037332 Zm00001d008216 Zm00001d035004 Zm00001d036542 Zm00001d027295 Zm00001d000349 Zm00001d021721 Zm00001d026623 Zm00001d033850 Zm00001d040286 Zm00001d038842 Zm00001d039157 Zm00001d013139 Zm00001d050089 Zm00001d005460 Zm00001d021891 Zm00001d013367 Zm00001d046336 Zm00001d013612 Zm00001d000350 Zm00001d047910 Zm00001d028436 Zm00001d036708 Zm00001d036492 Zm00001d033457 Zm00001d008984 Zm00001d0…	zma:103643294 zma:542418 zma:103628939 zma:542561 zma:100273658 zma:542482 zma:100280574 zma:100272336 zma:100037751 zma:100191223 zma:103630662 zma:100281241 zma:103625832 zma:103653328 zma:103647314 zma:542582 zma:100381303 zma:100286306 zma:100381283 zma:542482 zma:103639351 zma:100381766 zma:100280916 zma:542248 zma:542416 zma:100283666 zma:103644161 zma:542094 zma:542094 zma:542017 zma:10362…	103643294 542418 103628939 542561 100273658 542482 100280574 100272336 100037751 100191223 103630662 100281241 103625832 103653328 103647314 542582 100381303 100286306 100381283 542482 103639351 100381766 100280916 542248 542416 100283666 103644161 542094 542094 542017 103626681 103626681 103632727 542248 542327 100193453 100280225 100191223	GRMZM2G092595 TUBB5, GRMZM2G133802, tub5 GRMZM2G040296 mir1, CL872_-2, CL872_-2_ov, GRMZM2G150276 GRMZM2G164696 csy1, GRMZM5G809546, SECY GRMZM2G019999 magi9825, GRMZM2G042636, TIDP3158 TUA1, TUBA1 GRMZM2G017329 GRMZM2G090034 pco086635(414), GRMZM2G144372 GRMZM5G853513 GRMZM2G074687 tua6, GRMZM2G083243, TUBA6 GRMZM2G152466, TUBA4, tua4 GRMZM2G094497, vpp2 csy1, GRMZM5G809546, SECY GRMZM2G104418 G…
			Sphingolipid metabolism	9	51	0.992032	0.999997	Zm00001d019552 Zm00001d017748 Zm00001d052258 Zm00001d035537 Zm00001d044175 Zm00001d049259 Zm00001d044833 Zm00001d042066 Zm00001d048988	zma:100191564 zma:100193352 zma:100283399 zma:103651320 zma:100279713 zma:103652945 zma:100282881 zma:100217216 zma:103652830	100191564 100193352 100283399 103651320 100279713 103652945 100282881 100217216 103652830	GRMZM2G146463 GRMZM2G167431 cl24314_1 GRMZM2G124276
			Ubiquitin mediated proteolysis	46	178	0.992033	0.999997	Zm00001d037096 Zm00001d000224 Zm00001d013540 Zm00001d040390 Zm00001d023222 Zm00001d029141 Zm00001d027649 Zm00001d018884 Zm00001d042929 Zm00001d000168 Zm00001d029561 Zm00001d045133 Zm00001d029203 Zm00001d038972 Zm00001d004898 Zm00001d007897 Zm00001d048473 Zm00001d020989 Zm00001d010618 Zm00001d027427 Zm00001d009440 Zm00001d032830 Zm00001d013361 Zm00001d014920 Zm00001d010858 Zm00001d041105 Zm00001d0…	zma:100193789 zma:100274332 zma:103625986 zma:100284022 zma:100279472 zma:100272854 zma:100192089 zma:100283297 zma:100283106 zma:100285215 zma:103636597 zma:100279006 zma:100170243 zma:103638448 zma:100217233 zma:100283297 zma:100282735 zma:100281541 zma:541665 zma:100283731 zma:100282264 zma:100281796 zma:100192745 zma:100193107 zma:103635893 zma:103650429 zma:100192735 zma:103651370 zma:100273…	100193789 100274332 103625986 100284022 100279472 100272854 100192089 100283297 100283106 100285215 103636597 100279006 100170243 103638448 100217233 100283297 100282735 100281541 541665 100283731 100282264 100281796 100192745 100193107 103635893 103650429 100192735 103651370 100273613 100381699 103651829 100279472 103634565 103635427 103635779 100192813 100286122 100282249 103650429 101202716 10…	uaz7c01b12, GRMZM2G116919 pco067008, GRMZM2G138176 GRMZM2G461948 pco090876 GRMZM2G052034 GRMZM2G062724 GRMZM2G007300 GRMZM2G063192, IDP308 GRMZM2G030805 cl5847_1, GRMZM2G061624 GRMZM2G464572 GRMZM2G028183 GRMZM2G063931 GRMZM2G035999 UBC, GRMZM2G132759 GRMZM2G054247 GRMZM2G005365 GRMZM2G074282 GRMZM2G166089 GRMZM2G007057 GRMZM2G147603 GRMZM2G126956 pco090876 GRMZM5G824629 GRMZM2G356142, GRMZM2G430…
			Protein processing in endoplasmic reticulum	90	316	0.992479	0.999997	Zm00001d002944 Zm00001d043441 Zm00001d016060 Zm00001d045665 Zm00001d048687 Zm00001d047373 Zm00001d018724 Zm00001d041550 Zm00001d015777 Zm00001d000350 Zm00001d012664 Zm00001d010618 Zm00001d038804 Zm00001d043339 Zm00001d004119 Zm00001d037590 Zm00001d021498 Zm00001d002388 Zm00001d013549 Zm00001d026607 Zm00001d000349 Zm00001d007271 Zm00001d034805 Zm00001d005544 Zm00001d028782 Zm00001d045133 Zm00001d0…	zma:100282884 zma:100279881 zma:100384252 zma:100274222 zma:103652717 zma:100282238 zma:100382771 zma:103650526 zma:100283886 zma:542482 zma:100285907 zma:541665 zma:100279881 zma:100285907 zma:100384319 zma:606414 zma:103633177 zma:100502479 zma:100193211 zma:100192699 zma:542482 zma:100282088 zma:100286182 zma:100191694 zma:100279728 zma:100279006 zma:100217233 zma:100194158 zma:103647314 zma:1…	100282884 100279881 100384252 100274222 103652717 100282238 100382771 103650526 100283886 542482 100285907 541665 100279881 100285907 100384319 606414 103633177 100502479 100193211 100192699 542482 100282088 100286182 100191694 100279728 100279006 100217233 100194158 103647314 103640123 103633515 103627875 103638745 100276154 100280916 606411 100282762 100382471 103639569 100279874 100280907 1036…	umc2627, GRMZM2G177273 GRMZM2G154165 pcl20249-1(711), GRMZM2G140582 HSP70 GRMZM2G170843 GRMZM2G044060 hsp70-4 GRMZM5G803365 csy1, GRMZM5G809546, SECY cl21045_1, GRMZM2G027131 UBC, GRMZM2G132759 GRMZM2G154165 cl21045_1, GRMZM2G027131 pdi7, GRMZM2G159369, PDIL2-2 GRMZM2G117612 GRMZM2G130889 AY110835, GRMZM2G129150 GRMZM2G040876 csy1, GRMZM5G809546, SECY GRMZM2G375517 pco111827 GRMZM2G166897 GRMZM2G…
			Homologous recombination	24	106	0.992761	0.999997	Zm00001d052113 Zm00001d053070 Zm00001d002082 Zm00001d050437 Zm00001d043540 Zm00001d028210 Zm00001d008890 Zm00001d026402 Zm00001d021015 Zm00001d033259 Zm00001d049605 Zm00001d024677 Zm00001d038113 Zm00001d021898 Zm00001d013976 Zm00001d008342 Zm00001d024509 Zm00001d044278 Zm00001d041757 Zm00001d050612 Zm00001d024423 Zm00001d018531 Zm00001d048086 Zm00001d018287	zma:100383373 zma:103654581 zma:103645850 zma:103653487 zma:100502363 zma:100280726 zma:100279971 zma:103642101 zma:100383032 zma:100282426 zma:103641317 zma:103641317 zma:103630322 zma:541709 zma:100501841 zma:100285910 zma:100280534 zma:100284087 zma:541710 zma:103653563 zma:103642510 zma:100272286 zma:100273584 zma:100280239	100383373 103654581 103645850 103653487 100502363 100280726 100279971 103642101 100383032 100282426 103641317 103641317 103630322 541709 100501841 100285910 100280534 100284087 541710 103653563 103642510 100272286 100273584 100280239	GRMZM2G000093 GRMZM2G330229 cl11267_1, GRMZM2G098714 GRMZM2G005536, GRMZM2G148626 GRMZM2G480171 GRMZM2G102181 GRMZM2G393742 GRMZM2G393742 GRMZM2G154946, rmr1 rad51a, GRMZM2G121543 GRMZM2G006246 GRMZM2G154896 GRMZM2G369260 GRMZM2G123089 rad51b, GRMZM2G084762 pco076382, GRMZM2G445958 GRMZM2G086934 GRMZM2G039683
			RNA degradation	43	176	0.996606	0.999997	Zm00001d045326 Zm00001d013912 Zm00001d036540 Zm00001d040082 Zm00001d027278 Zm00001d043563 Zm00001d039400 Zm00001d002340 Zm00001d005674 Zm00001d028409 Zm00001d035937 Zm00001d054089 Zm00001d045544 Zm00001d017883 Zm00001d051951 Zm00001d008777 Zm00001d005276 Zm00001d032158 Zm00001d032979 Zm00001d008977 Zm00001d034013 Zm00001d030373 Zm00001d045590 Zm00001d012661 Zm00001d013653 Zm00001d018891 Zm00001d0…	zma:100285548 zma:103628077 zma:103633816 zma:103649879 zma:100383837 zma:100281464 zma:103649602 zma:100193338 zma:100283280 zma:103633537 zma:103629384 zma:100280498 zma:542185 zma:103627664 zma:100282925 zma:103634889 zma:100381531 zma:100272282 zma:100279626 zma:100383823 zma:103649879 zma:542316 zma:103638180 zma:100384291 zma:103643788 zma:103631988 zma:100281429 zma:100192964 zma:100284434…	100285548 103628077 103633816 103649879 100383837 100281464 103649602 100193338 100283280 103633537 103629384 100280498 542185 103627664 100282925 103634889 100381531 100272282 100279626 100383823 103649879 542316 103638180 100384291 103643788 103631988 100281429 100192964 100284434 100282428 100381661 100282980 100857010 100280694 103653357 100281965 103647171 100274470 103643788 103633568 10027…	GRMZM2G051756 GRMZM5G879882 Rcd1L4, GRMZM2G045331, GRMZM2G045331_T01 GRMZM2G034848 GRMZM2G042253 GRMZM2G095252, GRMZM2G133698 GRMZM2G083716 GRMZM2G029186 GRMZM2G047949 cl339_1a, GRMZM2G047019 gpm725 GRMZM2G011079 eno2, GRMZM2G048371 GRMZM2G040995 GRMZM2G037280, GRMZM2G468132 GRMZM2G340749 GRMZM2G377761 umc1463, GRMZM2G010357 rph1, GRMZM2G345039 Rcd1L1 cl340_1, GRMZM2G054056 pco062058 GRMZM2G14387…
			Proteasome	20	99	0.997422	0.999997	Zm00001d043137 Zm00001d028801 Zm00001d021051 Zm00001d048271 Zm00001d018409 Zm00001d017338 Zm00001d018309 Zm00001d047941 Zm00001d032010 Zm00001d022573 Zm00001d035915 Zm00001d014436 Zm00001d036108 Zm00001d015788 Zm00001d039483 Zm00001d007215 Zm00001d040334 Zm00001d053649 Zm00001d007038 Zm00001d026517	zma:100283656 zma:100279843 zma:100286342 zma:100191154 zma:100274559 zma:100193683 zma:100274064 zma:100283637 zma:100283005 zma:100501403 zma:100283485 zma:100285832 zma:100272427 zma:100282100 zma:100282470 zma:100501403 zma:100217166 zma:100383510 zma:100383475 zma:100276453	100283656 100279843 100286342 100191154 100274559 100193683 100274064 100283637 100283005 100501403 100283485 100285832 100272427 100282100 100282470 100501403 100217166 100383510 100383475 100276453	IDP149 GRMZM5G817037 pco108605 GRMZM2G032505 GRMZM5G824831 GRMZM2G110185 GRMZM2G147671 umc1374, GRMZM2G119761 GRMZM2G056569 pco138078, GRMZM2G140867 GRMZM2G083076 GRMZM2G374881 GRMZM2G171604 GRMZM2G073077 GRMZM2G056569 GRMZM2G033626, GRMZM2G467059 GRMZM2G008623 GRMZM2G368908
			Basal transcription factors	10	61	0.997456	0.999997	Zm00001d033928 Zm00001d001809 Zm00001d038109 Zm00001d042792 Zm00001d041969 Zm00001d039731 Zm00001d043797 Zm00001d046579 Zm00001d010711 Zm00001d030573	zma:100283483 zma:103645755 zma:100273893 zma:103650984 zma:100286346 zma:100384748 zma:103651319 zma:103638720 zma:100216909 zma:100273074	100283483 103645755 100273893 103650984 100286346 100384748 103651319 103638720 100216909 100273074	pco103361, GRMZM2G361662 GRMZM2G147854 GRMZM2G145879 umc2401, GRMZM2G470513 si660063f11 GRMZM2G042231, GRMZM2G343917, GRMZM2G394722 GRMZM2G060284 GRMZM2G045668, GRMZM2G107406
			Spliceosome	67	269	0.999304	0.999997	Zm00001d013543 Zm00001d034768 Zm00001d039541 Zm00001d010901 Zm00001d028804 Zm00001d033226 Zm00001d008293 Zm00001d035552 Zm00001d036301 Zm00001d037925 Zm00001d011155 Zm00001d013010 Zm00001d029256 Zm00001d015248 Zm00001d015495 Zm00001d012420 Zm00001d042922 Zm00001d028384 Zm00001d050316 Zm00001d045076 Zm00001d037625 Zm00001d050357 Zm00001d014753 Zm00001d053882 Zm00001d048687 Zm00001d047191 Zm00001d0…	zma:100191289 zma:100283145 zma:107275236 zma:100283928 zma:100383254 zma:103644459 zma:103634672 zma:100382130 zma:103629533 zma:100285019 zma:103636001 zma:100282830 zma:100272550 zma:100277544 zma:103626713 zma:100501536 zma:103651028 zma:100282785 zma:103653436 zma:100282961 zma:100383017 zma:100280157 zma:100274600 zma:100277544 zma:103652717 zma:103635858 zma:100193339 zma:100280773 zma:100…	100191289 100283145 107275236 100283928 100383254 103644459 103634672 100382130 103629533 100285019 103636001 100282830 100272550 100277544 103626713 100501536 103651028 100282785 103653436 100282961 100383017 100280157 100274600 100277544 103652717 103635858 100193339 100280773 100286176 100282336 100856927 103650526 100272442 100193841 100272743 542693 100286059 100284147 100281963 100280773 10…	TIDP3245, GRMZM2G161242 GRMZM5G874478 pco106378a GRMZM2G028156 RS2Z37A, GRMZM2G175419 GRMZM2G433801 srp31, GRMZM2G170365, cl49267_1(600) GRMZM2G077125 GRMZM2G057329 SCL28 GRMZM2G410393 GRMZM2G174785 GRMZM2G132857 RSZ21, GRMZM2G151923, pco131393 GRMZM2G171921 GRMZM2G102447 GRMZM2G410393 HSP70 GRMZM2G113139 cl3001_1a, GRMZM2G139643 si606066c12, GRMZM2G076399 GRMZM2G057394 GRMZM2G083642 hsp70-4 pco0…
			Mismatch repair	16	94	0.999526	0.999997	Zm00001d052113 Zm00001d048086 Zm00001d043835 Zm00001d001806 Zm00001d050929 Zm00001d050437 Zm00001d018531 Zm00001d051995 Zm00001d024509 Zm00001d007500 Zm00001d053070 Zm00001d034399 Zm00001d043540 Zm00001d028210 Zm00001d008890 Zm00001d008342	zma:100383373 zma:100273584 zma:103651343 zma:103645753 zma:103653697 zma:103653487 zma:100272286 zma:542357 zma:100280534 zma:103648088 zma:103654581 zma:100193357 zma:100502363 zma:100280726 zma:100279971 zma:100285910	100383373 100273584 103651343 103645753 103653697 103653487 100272286 542357 100280534 103648088 103654581 100193357 100502363 100280726 100279971 100285910	GRMZM2G086934 GRMZM2G348956 pco076382, GRMZM2G445958 magi81248, GRMZM2G108712, ZmPCNA2, pcna2 GRMZM2G369260 GRMZM2G457381 pco093185f GRMZM2G330229 cl11267_1, GRMZM2G098714 GRMZM2G005536, GRMZM2G148626 GRMZM2G154896
			Ribosome	139	504	0.999648	0.999997	Zm00001d022111 Zm00001d037603 Zm00001d022463 Zm00001d000104 GRMZM5G899892 Zm00001d028153 Zm00001d009579 Zm00001d038084 Zm00001d037489 Zm00001d012878 Zm00001d028240 Zm00001d034790 GRMZM5G838396 Zm00001d032420 Zm00001d034192 Zm00001d021445 Zm00001d011596 Zm00001d033665 Zm00001d046583 Zm00001d033604 Zm00001d022301 Zm00001d032896 Zm00001d021652 Zm00001d011741 Zm00001d010614 Zm00001d022180 Zm00001d015…	zma:100194112 zma:103635488 zma:100192778 zma:100216896 zma:845215 zma:103632450 zma:100286074 zma:100283907 zma:100280771 zma:101027121 zma:100273366 zma:103644306 zma:845237 zma:103643355 zma:732840 zma:100192835 zma:100286220 zma:100283244 zma:100192550 zma:103633877 zma:100285083 zma:100281641 zma:103633242 zma:542641 zma:100193262 zma:103633434 zma:100193892 zma:100283777 zma:100286214 zma:8…	100194112 103635488 100192778 100216896 845215 103632450 100286074 100283907 100280771 101027121 100273366 103644306 845237 103643355 732840 100192835 100286220 100283244 100192550 103633877 100285083 100281641 103633242 542641 100193262 103633434 100193892 100283777 100286214 845213 100284921 100272335 100272335 100286371 103653691 845215 100192625 100216899 100194313 100285769 542323 100193696 …	GRMZM2G093902 GRMZM2G063617 cl25046_1a, GRMZM2G069762 rpl2, ZemaCp109 GRMZM2G047513 pco154872, GRMZM2G113720 GRMZM2G005973 GRMZM2G166659 rps4, GRMZM2G125271 GRMZM2G164965 GRMZM2G035017, rps4 rps3, ZemaCp061 GRMZM2G025855 lem1 GRMZM2G140116 pco086004, GRMZM2G163988 umc1306, GRMZM2G153476 pco069156, GRMZM2G100462 TIDP2957, GRMZM2G038833 pco066882(728), GRMZM2G151252 pco064822, GRMZM5G899149 GRMZM2G…
			RNA transport	57	249	0.99985	0.999997	Zm00001d021886 Zm00001d010901 Zm00001d002166 Zm00001d022527 Zm00001d036480 Zm00001d007065 Zm00001d047794 Zm00001d044593 Zm00001d014246 Zm00001d015999 Zm00001d041988 Zm00001d025979 Zm00001d016627 Zm00001d044193 Zm00001d050357 Zm00001d028262 Zm00001d041682 Zm00001d015754 Zm00001d048473 Zm00001d028782 Zm00001d036904 Zm00001d036905 Zm00001d005276 Zm00001d005238 Zm00001d027427 Zm00001d048741 Zm00001d0…	zma:100285452 zma:100283928 zma:103646106 zma:100304359 zma:542348 zma:100279429 zma:100272743 zma:101202711 zma:100283019 zma:103626926 zma:100283973 zma:103641899 zma:103628666 zma:100284280 zma:100280157 zma:103632918 zma:100381286 zma:103626805 zma:100282735 zma:100279728 zma:542581 zma:103629787 zma:100381531 zma:100284265 zma:100283731 zma:103652740 zma:103632647 zma:103633416 zma:100272301…	100285452 100283928 103646106 100304359 542348 100279429 100272743 101202711 100283019 103626926 100283973 103641899 103628666 100284280 100280157 103632918 100381286 103626805 100282735 100279728 542581 103629787 100381531 100284265 100283731 103652740 103632647 103633416 100272301 100283191 100381984 100217092 103635013 103633590 100384700 103646106 103630200 100273717 100217092 103639423 10028…	pco106378a GRMZM2G084062 tif-4A3, GRMZM2G027995 cl23032_-2, GRMZM2G059015 si946052g10b, GRMZM2G166780 GRMZM2G051174 GRMZM2G418206 GRMZM2G386430 GRMZM5G861959 IDP351, GRMZM2G057853 GRMZM2G171921 GRMZM2G002616 GRMZM2G056661 GRMZM2G063931 GRMZM2G058138 EF1-A, EF1A, GRMZM2G153541 GRMZM2G105398 GRMZM2G151549 GRMZM2G004475 GRMZM2G030578 si486016f12b, GRMZM2G156174 GRMZM5G810275 GRMZM5G802566 GRMZM2G379…
			Ribosome biogenesis in eukaryotes	18	128	0.999997	0.999997	Zm00001d021557 Zm00001d029978 Zm00001d029174 Zm00001d020853 Zm00001d042575 Zm00001d006440 Zm00001d029144 Zm00001d037267 Zm00001d036634 Zm00001d033130 Zm00001d005191 Zm00001d051885 Zm00001d022551 Zm00001d047472 Zm00001d028384 Zm00001d051116 Zm00001d024539 Zm00001d034914	zma:541824 zma:542628 zma:100283975 zma:100191832 zma:100280516 zma:100283448 zma:100384739 zma:100193155 zma:100273853 zma:100274701 zma:100280516 zma:100282167 zma:103633590 zma:103639131 zma:100282785 zma:100284497 zma:100285001 zma:103625708	541824 542628 100283975 100191832 100280516 100283448 100384739 100193155 100273853 100274701 100280516 100282167 103633590 103639131 100282785 100284497 100285001 103625708	pco084367(373), GRMZM2G161611 pco146174(472) pco078604, GRMZM2G144995 GRMZM2G051626 GRMZM2G038309 GRMZM2G171613 umc1472, GRMZM2G124576 GRMZM2G053767 GRMZM2G032419 pco112886, GRMZM2G403149 GRMZM2G038309 pco102583(157) GRMZM2G041527 GRMZM2G110233 GRMZM2G133838 GRMZM2G001551 GRMZM2G022258

## Sheet: co_expression_L
pathway_term_Top20	gene_number		Term	Sample number	Background number	P-value	Corrected P-value	UniGenes	KO	Entrez ID	Ensembl ID	Gene name
Photosynthesis	75		Photosynthesis	75	101	6.35879e-09	8.01208e-07	Zm00001d052242 Zm00001d023713 Zm00001d008706 Zm00001d035002 Zm00001d035003 Zm00001d035001 Zm00001d018797 Zm00001d029049 Zm00001d021703 Zm00001d013039 Zm00001d045620 GRMZM5G856777 GRMZM5G800780 Zm00001d033469 Zm00001d020877 Zm00001d006540 Zm00001d000282 Zm00001d006403 Zm00001d014564 Zm00001d050889 Zm00001d010136 Zm00001d049650 Zm00001d039687 Zm00001d035859 Zm00001d005446 Zm00001d045621 Zm00001d006…	zma:100281924 zma:103640891 zma:100281679 zma:103628935 zma:541619 zma:101027099 zma:100286020 zma:100282043 zma:103633267 zma:100191984 zma:100192779 zma:845201 zma:845192 zma:100284745 zma:100284847 zma:103647735 zma:845200 zma:845170 zma:100191684 zma:103653672 zma:100281226 zma:100281349 zma:100281679 zma:103629356 zma:100283327 zma:100192779 zma:845191 zma:845170 zma:845203 zma:100281199 zma…	100281924 103640891 100281679 103628935 541619 101027099 100286020 100282043 103633267 100191984 100192779 845201 845192 100284745 100284847 103647735 845200 845170 100191684 103653672 100281226 100281349 100281679 103629356 100283327 100192779 845191 845170 845203 100281199 845205 541612 100191684 100281877 100273120 100282643 845174 541626 845170 1466379 100280994 100282566 845170 100273026 103…	GRMZM2G009048 fdx5, GRMZM2G122327 fdx2, GRMZM2G048313, pFD2 FDX1, GRMZM2G122337 psa6, GRMZM2G012397 GRMZM2G056424 GRMZM2G013342 psbC, ZemaCp008 petB, ZemaCp052 GRMZM2G377855 GRMZM5G804323 psbB, ZemaCp048 atpB, ZemaCp031 GRMZM2G113349 GRMZM2G021256 GRMZM2G071450 GRMZM2G016066 petA, ZemaCp036 atpB, ZemaCp031 psbE, ZemaCp040 GRMZM2G176840 psbH, ZemaCp051 pco072676(750), FDX6, GRMZM2G106190 GRMZM2G11…
Porphyrin and chlorophyll metabolism	43		Porphyrin and chlorophyll metabolism	43	64	5.62335e-05	0.00354271	Zm00001d027416 Zm00001d003214 Zm00001d031308 Zm00001d027656 Zm00001d036894 Zm00001d036046 Zm00001d026603 Zm00001d013915 Zm00001d013013 Zm00001d011876 Zm00001d001820 Zm00001d013937 Zm00001d003735 Zm00001d048372 Zm00001d011819 Zm00001d027848 Zm00001d018034 Zm00001d029150 Zm00001d031860 Zm00001d053807 Zm00001d014715 Zm00001d042026 Zm00001d043259 Zm00001d053901 Zm00001d011387 Zm00001d011386 Zm00001d0…	zma:100285830 zma:541866 zma:100192499 zma:103631716 zma:100526754 zma:100273426 zma:100382191 zma:103626130 zma:103625782 zma:542164 zma:100194154 zma:100381341 zma:100383787 zma:100281059 zma:100284976 zma:100193223 zma:100283007 zma:100281890 zma:100192754 zma:100284619 zma:100284052 zma:100274228 zma:100284365 zma:100383787 zma:100383208 zma:100192850 zma:542554 zma:542606 zma:103634652 zma:1…	100285830 541866 100192499 103631716 100526754 100273426 100382191 103626130 103625782 542164 100194154 100381341 100383787 100281059 100284976 100193223 100283007 100281890 100192754 100284619 100284052 100274228 100284365 100383787 100383208 100192850 542554 542606 103634652 100192907 100500945 100191436 100193482 103634652 100383208 100191140 100272914 100193466 100191887 732841 100383045 1002…	GRMZM2G105436 prpo2, GRMZM2G364901 GRMZM2G339563 HO-1 GRMZM2G161673 GRMZM2G323024 GRMZM2G107402 GRMZM2G043453 elm1, GRMZM5G861678, Hy2 pcr1, GRMZM2G084958 GRMZM2G073351, por GRMZM2G057491 pco079065e GRMZM2G162776 pco077228, GRMZM2G105644 DVR, GRMZM2G063048 GRMZM2G056686 pco070684 pco065721, GRMZM2G397247 GRMZM2G024738 prpo1, GRMZM2G039396, PPO les22, GRMZM2G044074 GRMZM2G081462 GRMZM2G093197 GRMZ…
Metabolic pathways	871		Metabolic pathways	871	2609	0.00148836	0.0625112	Zm00001d047358 Zm00001d007687 Zm00001d040220 Zm00001d046112 Zm00001d050293 Zm00001d020686 Zm00001d039131 Zm00001d015570 Zm00001d003735 Zm00001d016993 Zm00001d022192 Zm00001d031899 Zm00001d028325 GRMZM5G866223 Zm00001d032311 Zm00001d035537 Zm00001d014944 Zm00001d038794 Zm00001d043328 Zm00001d007857 Zm00001d020139 Zm00001d042969 Zm00001d018033 Zm00001d038830 Zm00001d034129 GRMZM5G815553 Zm00001d018…	zma:103639086 zma:100273624 zma:100194257 zma:732743 zma:103653427 zma:100382364 zma:542737 zma:103626734 zma:100383787 zma:100193560 zma:677667 zma:542374 zma:100217085 zma:845188 zma:103643324 zma:103651320 zma:100282503 zma:103630641 zma:100384288 zma:107648855 zma:100282194 zma:103636525 zma:100101526 zma:103630655 zma:100382459 zma:1466379 zma:100283007 zma:542319 zma:542029 zma:100284286 zm…	103639086 100273624 100194257 732743 103653427 100382364 542737 103626734 100383787 100193560 677667 542374 100217085 845188 103643324 103651320 100282503 103630641 100384288 107648855 100282194 103636525 100101526 103630655 100382459 1466379 100283007 542319 542029 100284286 100281709 100283489 103641727 100191620 103629163 103641723 100278194 100274212 100273392 100281036 845193 100284317 10028…	GRMZM2G149273 IDP610, GRMZM2G152258 IDP664 spesyn, GRMZM2G047867, spds2 GRMZM2G366659 cl955_1, GRMZM2G007249 AGP2, GRMZM2G027955 GRMZM2G462613 GRMZM2G444643 si603015d01b, GRMZM5G840145, SRA mdh6, GRMZM2G129513 GRMZM2G107199 ndhI, frxB, ZemaCp090 GRMZM2G008226 cl2158_1, GRMZM2G128929 GRMZM2G043943 LIP1P-2, GRMZM2G101698 pco084690, GRMZM2G322314 GRMZM5G801793, GRMZM5G879240 GRMZM2G105791 GRMZM2G158…
Photosynthesis - antenna proteins	22		Photosynthesis - antenna proteins	22	31	0.00214389	0.0675325	Zm00001d021763 Zm00001d005814 Zm00001d032197 Zm00001d021906 Zm00001d046786 Zm00001d006663 Zm00001d044399 Zm00001d032051 Zm00001d018157 Zm00001d044396 Zm00001d009589 Zm00001d050403 Zm00001d026599 Zm00001d007267 Zm00001d011285 Zm00001d006587 Zm00001d039040 Zm00001d001857 Zm00001d015385 Zm00001d048998 Zm00001d021784 Zm00001d021435	zma:542478 zma:100273427 zma:100284001 zma:100282512 zma:100282214 zma:100191715 zma:100282054 zma:100273752 zma:100281795 zma:103651575 zma:542530 zma:100280410 zma:542321 zma:542716 zma:100274453 zma:100216729 zma:100193833 zma:100273752 zma:100281791 zma:542320 zma:100284154 zma:100281248	542478 100273427 100284001 100282512 100282214 100191715 100282054 100273752 100281795 103651575 542530 100280410 542321 542716 100274453 100216729 100193833 100273752 100281791 542320 100284154 100281248	psb29, GRMZM2G033885, cp29 GRMZM2G117412 gpm571, GRMZM2G153184 GRMZM2G072280 GRMZM2G010884 GRMZM2G038519 GRMZM2G104549 GRMZM2G039996 csu1028(lhcb), GRMZM2G103101 lhcb3, GRMZM2G155216, cab-m9 lhcb6, CP24, GRMZM2G092427, Lhcb6-1 lhcb5, GRMZM2G149428, Lhcb5-1 lhcb7, Cab-m7, GRMZM2G402936 GRMZM2G039996 GRMZM2G092311 Lhcb5-2 GRMZM2G057281 CAB1, LHCP
Ubiquinone and other terpenoid-quinone biosynthesis	29		Ubiquinone and other terpenoid-quinone biosynthesis	29	55	0.011299	0.244575	Zm00001d043249 Zm00001d012510 Zm00001d045322 Zm00001d014157 Zm00001d030132 Zm00001d046915 Zm00001d011773 Zm00001d027711 Zm00001d016995 Zm00001d016471 Zm00001d017746 Zm00001d006387 Zm00001d005251 Zm00001d015459 Zm00001d012607 Zm00001d047869 Zm00001d046909 Zm00001d010699 Zm00001d048736 Zm00001d016441 Zm00001d009858 Zm00001d043970 Zm00001d035200 Zm00001d027999 Zm00001d006657 Zm00001d020220 Zm00001d0…	zma:100283201 zma:103636555 zma:100272292 zma:100280914 zma:103637741 zma:542166 zma:103636258 zma:100191850 zma:100275708 zma:100284998 zma:732837 zma:103638712 zma:100279567 zma:542166 zma:100285365 zma:100383639 zma:732789 zma:100285601 zma:100191816 zma:100191283 zma:100272801 zma:100304279 zma:100275595 zma:100285808 zma:100280305 zma:100275708 zma:100384459 zma:100284931 zma:100280065	100283201 103636555 100272292 100280914 103637741 542166 103636258 100191850 100275708 100284998 732837 103638712 100279567 542166 100285365 100383639 732789 100285601 100191816 100191283 100272801 100304279 100275595 100285808 100280305 100275708 100384459 100284931 100280065	csu690, GRMZM2G138800 GRMZM2G010468 GRMZM2G028552 GRMZM2G042136 GRMZM2G433624 pco063262, 4CL, GRMZM2G075333 GRMZM2G438673 GRMZM2G122787 GRMZM2G022837, si486016e08b GRMZM2G028677 cl364_1, GRMZM2G035213, TMT GRMZM2G173358 GRMZM2G165133 pco063262, 4CL, GRMZM2G075333 gpm345, GRMZM2G159643 GRMZM2G065210, GRMZM2G128648 VTE2-1, GRMZM2G048472 IDP2456, GRMZM2G082792 GRMZM2G006480 pco115235a GRMZM2G139874 …
Biosynthesis of secondary metabolites	497		Biosynthesis of secondary metabolites	497	1481	0.0127336	0.244575	Zm00001d047358 Zm00001d027656 Zm00001d039131 Zm00001d045261 Zm00001d028325 Zm00001d042842 Zm00001d018033 Zm00001d034129 Zm00001d018034 Zm00001d004125 Zm00001d040702 Zm00001d017258 Zm00001d037182 Zm00001d035443 Zm00001d029502 Zm00001d010204 Zm00001d003252 Zm00001d052903 Zm00001d021533 Zm00001d020008 Zm00001d031071 Zm00001d047514 Zm00001d004956 Zm00001d028199 Zm00001d009411 Zm00001d021310 Zm00001d0…	zma:103639086 zma:103631716 zma:542737 zma:541669 zma:100217085 zma:100285259 zma:100101526 zma:100382459 zma:100283007 zma:542319 zma:542029 zma:100284286 zma:732731 zma:103629163 zma:100383765 zma:100273392 zma:100284317 zma:100280335 zma:103633187 zma:100382674 zma:100284931 zma:100281052 zma:100381436 zma:100192939 zma:100383422 zma:100191222 zma:100282968 zma:100286146 zma:100272801 zma:1002…	103639086 103631716 542737 541669 100217085 100285259 100101526 100382459 100283007 542319 542029 100284286 732731 103629163 100383765 100273392 100284317 100280335 103633187 100382674 100284931 100281052 100381436 100192939 100383422 100191222 100282968 100286146 100272801 100284902 100191566 100194154 100383639 100275708 103637119 100279815 100283031 100383768 542735 100279231 100280719 542166 …	GRMZM2G149273 GRMZM2G339563 AGP2, GRMZM2G027955 ss1, GRMZM2G129451 GRMZM2G107199 gpm274, GRMZM2G085577 GRMZM2G105791 GRMZM2G047456 pco077228, GRMZM2G105644 ACC1, GRMZM5G858094 pox1, PER1, PRX1, pmPOX1 opr3, GRMZM2G156712 GRMZM2G119583 GRMZM2G042516 GRMZM2G130230 GRMZM2G010640 GRMZM2G106950 pco114350(339), GRMZM2G082998 GRMZM2G015280 cl277_1, GRMZM2G469969 GRMZM2G015804 GRMZM2G003875 GRMZM5G852968…
Circadian rhythm - plant	34		Circadian rhythm - plant	34	69	0.0135875	0.244575	Zm00001d021557 Zm00001d004875 Zm00001d003226 Zm00001d004502 Zm00001d021135 Zm00001d039072 Zm00001d021291 Zm00001d029978 Zm00001d022590 Zm00001d003477 Zm00001d053091 Zm00001d004630 Zm00001d039589 Zm00001d015290 Zm00001d046402 Zm00001d052781 Zm00001d001004 Zm00001d051114 Zm00001d034125 Zm00001d052138 Zm00001d047761 Zm00001d007403 Zm00001d047632 Zm00001d008205 Zm00001d007445 Zm00001d006116 Zm00001d0…	zma:541824 zma:100272683 zma:100127530 zma:100193188 zma:103633010 zma:103635349 zma:100273598 zma:542628 zma:103633607 zma:100384475 zma:100279726 zma:100127526 zma:100272803 zma:103626626 zma:103638645 zma:100272683 zma:100127539 zma:100281433 zma:542637 zma:100286122 zma:100280240 zma:100282642 zma:100381811 zma:100279991 zma:100279726 zma:100127527 zma:100285170 zma:100383534 zma:103626521 zm…	541824 100272683 100127530 100193188 103633010 103635349 100273598 542628 103633607 100384475 100279726 100127526 100272803 103626626 103638645 100272683 100127539 100281433 542637 100286122 100280240 100282642 100381811 100279991 100279726 100127527 100285170 100383534 103626521 100286123 100147733 103629610 100383702 100127539	pco084367(373), GRMZM2G161611 TIDP3698, GRMZM2G135446, PRR59 ZCN25, GRMZM2G021560 GRMZM2G007399, GRMZM2G154799 GRMZM2G440005, ZCN24 GRMZM2G020291 GRMZM2G179024 pco146174(472) GRMZM2G005732 siu50817b, GRMZM2G024739 GRMZM2G106363 ZCN17, GRMZM2G075215 gigz1b GRMZM2G147800 GRMZM2G140355 TIDP3698, GRMZM2G135446, PRR59 gpm849, ZCN26 TIDP3407 gpm388c, ACK2, GRMZM2G143602 GRMZM2G104920 GRMZM2G095727 GRMZ…
Phenylalanine metabolism	25		Phenylalanine metabolism	25	48	0.0197359	0.31084	Zm00001d003016 Zm00001d012510 Zm00001d033286 Zm00001d004288 Zm00001d030132 Zm00001d052321 Zm00001d004287 Zm00001d027711 Zm00001d016471 Zm00001d017279 Zm00001d053619 Zm00001d017275 Zm00001d017274 Zm00001d017276 Zm00001d015459 Zm00001d014659 Zm00001d052842 Zm00001d003309 Zm00001d048736 Zm00001d016441 Zm00001d009858 Zm00001d046915 Zm00001d051161 Zm00001d018386 Zm00001d039276	zma:542258 zma:103636555 zma:100285115 zma:103646736 zma:103637741 zma:100284350 zma:103646736 zma:100191850 zma:100284998 zma:100381820 zma:103655990 zma:100273579 zma:542258 zma:103627433 zma:542166 zma:100284546 zma:100286151 zma:100383438 zma:100191816 zma:100191283 zma:100272801 zma:542166 zma:542258 zma:100282625 zma:100280065	542258 103636555 100285115 103646736 103637741 100284350 103646736 100191850 100284998 100381820 103655990 100273579 542258 103627433 542166 100284546 100286151 100383438 100191816 100191283 100272801 542166 542258 100282625 100280065	pal3, GRMZM2G074604, PAL1 GRMZM2G010468 GRMZM2G050937 GRMZM2G433624 cl405_1, GRMZM2G088847, mif GRMZM2G050937 GRMZM2G122787 GRMZM2G028677 GRMZM2G170692 GRMZM2G029048 pal3, GRMZM2G074604, PAL1 GRMZM2G334660 pco063262, 4CL, GRMZM2G075333 GRMZM2G048672, mif GRMZM2G033952 pco118120, GRMZM2G147884 GRMZM2G006480 pco115235a GRMZM2G139874 pco063262, 4CL, GRMZM2G075333 pal3, GRMZM2G074604, PAL1 GRMZM5G836…
Alanine, aspartate and glutamate metabolism	36		Alanine, aspartate and glutamate metabolism	36	80	0.0298201	0.417481	Zm00001d031364 Zm00001d031349 Zm00001d028750 Zm00001d015183 Zm00001d038460 Zm00001d051804 Zm00001d047603 Zm00001d051586 Zm00001d003522 Zm00001d032984 Zm00001d028260 Zm00001d031749 Zm00001d029083 Zm00001d002326 Zm00001d011192 Zm00001d033747 Zm00001d049380 Zm00001d011610 Zm00001d006875 Zm00001d037507 Zm00001d042673 Zm00001d031379 Zm00001d053776 Zm00001d017790 Zm00001d044250 Zm00001d030557 Zm00001d0…	zma:103645124 zma:100281949 zma:100192350 zma:100279867 zma:100384690 zma:542401 zma:100217081 zma:100193467 zma:100273302 zma:100384793 zma:542520 zma:100501579 zma:100501001 zma:103645944 zma:103636016 zma:542400 zma:100282236 zma:103636185 zma:100384793 zma:103631410 zma:100281060 zma:100281949 zma:100284047 zma:100273931 zma:103651512 zma:100193705 zma:100384690 zma:100282849 zma:103645133 zm…	103645124 100281949 100192350 100279867 100384690 542401 100217081 100193467 100273302 100384793 542520 100501579 100501001 103645944 103636016 542400 100282236 103636185 100384793 103631410 100281060 100281949 100284047 100273931 103651512 100193705 100384690 100282849 103645133 101027102 100280779 100286148 542334 100282236 100282625 100192351	GRMZM2G050481 pco084394 asn3, AsnS3 GRMZM2G107739 gln5, gs1-4 GRMZM5G895991 pco072185 GRMZM2G355906 GRMZM2G053939, GRMZM2G053999 GLN6, GS1-1, GS122 GRMZM5G817886 GRMZM2G700683 gln2, gs1-2 GRMZM2G077054 GRMZM2G053939, GRMZM2G053999 pco084394 GRMZM5G828630 GRMZM2G107739 uaz158(alt), GRMZM2G088064 GRMZM2G359559 GRMZM2G128114 GRMZM2G108125 adss1, GRMZM2G119852, PURA GRMZM5G836910 asn4, AsnS4, GRMZM2G…
Benzoxazinoid biosynthesis	8		Benzoxazinoid biosynthesis	8	10	0.0369187	0.439169	Zm00001d031209 Zm00001d048710 Zm00001d034461 Zm00001d048703 Zm00001d048702 Zm00001d048705 Zm00001d048709 Zm00001d048634	zma:100274317 zma:100192631 zma:100273163 zma:100382554 zma:103652724 zma:103652726 zma:542117 zma:541977	100274317 100192631 100273163 100382554 103652724 103652726 542117 541977	bx9, GRMZM2G161335 bx2, GRMZM2G085661 csu868(trp) CYP71C1, BX4, GRMZM2G172491 bx1, GRMZM2G085381, trpA bx6
Carbon fixation in photosynthetic organisms	47		Carbon fixation in photosynthetic organisms	47	113	0.0383402	0.439169	Zm00001d037961 Zm00001d028471 Zm00001d037514 Zm00001d021310 Zm00001d002454 Zm00001d053015 Zm00001d028562 Zm00001d052595 Zm00001d037962 Zm00001d032984 Zm00001d013135 Zm00001d000164 Zm00001d042840 Zm00001d027841 Zm00001d038579 Zm00001d049641 Zm00001d034241 Zm00001d022229 Zm00001d053453 Zm00001d016166 Zm00001d006875 Zm00001d018936 Zm00001d046962 Zm00001d008619 Zm00001d045451 Zm00001d025599 Zm00001d0…	zma:542331 zma:541622 zma:845212 zma:100191222 zma:100281866 zma:100272845 zma:100284339 zma:542212 zma:542331 zma:100384793 zma:100285298 zma:100279820 zma:100282017 zma:100274365 zma:100281237 zma:542367 zma:100282134 zma:107305678 zma:542479 zma:542479 zma:100384793 zma:100284771 zma:100279513 zma:100194114 zma:100279513 zma:103641727 zma:103635817 zma:100281068 zma:103641723 zma:542374 zma:54…	542331 541622 845212 100191222 100281866 100272845 100284339 542212 542331 100384793 100285298 100279820 100282017 100274365 100281237 542367 100282134 107305678 542479 542479 100384793 100284771 100279513 100194114 100279513 103641727 103635817 100281068 103641723 542374 542393 542290 845212 100282849 100284598 103635678 100193705 100282845 542368 100282981 542233 100273196 100273700 542212 5427…	me2, GRMZM2G122479 GRMZM2G001696 rbcL, ZemaCp032 GRMZM5G852968 si707035f08, GRMZM2G463280 AY110170, GRMZM2G155253 ssu1, SSu, rbcS, rbcs1 me2, GRMZM2G122479 GRMZM2G053939, GRMZM2G053999 GRMZM5G874903 shbp1 GRMZM2G026807 GRMZM2G089136 GAPC, GAPC1, GPC1 GRMZM2G072744 pep7, Ppc1C pep7, Ppc1C GRMZM2G053939, GRMZM2G053999 pco087551, GRMZM2G456086 GRMZM2G033208 GRMZM2G018177 GRMZM2G033208 GRMZM2G162845 …
Nicotinate and nicotinamide metabolism	12		Nicotinate and nicotinamide metabolism	12	24	0.106102	0.932382	Zm00001d034777 Zm00001d005157 Zm00001d004716 Zm00001d045394 Zm00001d015183 Zm00001d009463 Zm00001d025412 Zm00001d006311 Zm00001d034725 Zm00001d051927 Zm00001d040599 Zm00001d053076	zma:100274271 zma:100501566 zma:103646963 zma:100283048 zma:100279867 zma:100193647 zma:103646450 zma:100382929 zma:100193647 zma:100284011 zma:103650090 zma:103654587	100274271 100501566 103646963 100283048 100279867 100193647 103646450 100382929 100193647 100284011 103650090 103654587	pco103153 GRMZM2G049588 GRMZM2G046498 GRMZM2G177561, GRMZM2G391511 GRMZM5G887647
C5-Branched dibasic acid metabolism	7		C5-Branched dibasic acid metabolism	7	12	0.12662	0.932382	Zm00001d017467 Zm00001d002880 Zm00001d007288 Zm00001d026675 Zm00001d015088 Zm00001d017168 Zm00001d053960	zma:100286245 zma:100284589 zma:100279727 zma:100283376 zma:100284902 zma:100381801 zma:100193712	100286245 100284589 100279727 100283376 100284902 100381801 100193712	GRMZM5G840002 cl362_2b, GRMZM5G803490 GRMZM2G077215 GRMZM2G104613 GRMZM2G370852 GRMZM2G007647 PCO109372, GRMZM2G010044
Peroxisome	45		Peroxisome	45	122	0.136708	0.932382	Zm00001d013795 Zm00001d031349 Zm00001d035318 Zm00001d040161 Zm00001d027511 Zm00001d000107 Zm00001d031364 Zm00001d034832 Zm00001d009351 Zm00001d028542 Zm00001d002261 Zm00001d042278 Zm00001d045606 Zm00001d031908 Zm00001d024723 Zm00001d031403 Zm00001d054008 Zm00001d018810 Zm00001d029626 Zm00001d033091 Zm00001d011119 Zm00001d031028 Zm00001d020984 Zm00001d043851 Zm00001d018487 Zm00001d031379 Zm00001d0…	zma:100216568 zma:100281949 zma:100274053 zma:100283823 zma:542230 zma:100285021 zma:103645124 zma:103644323 zma:103635236 zma:100285700 zma:100285987 zma:103640918 zma:100382424 zma:100136885 zma:100279270 zma:103645133 zma:100384063 zma:100279535 zma:100384368 zma:100285035 zma:100283640 zma:100193229 zma:100283462 zma:100383523 zma:100192501 zma:100281949 zma:542764 zma:542370 zma:103653276 zm…	100216568 100281949 100274053 100283823 542230 100285021 103645124 103644323 103635236 100285700 100285987 103640918 100382424 100136885 100279270 103645133 100384063 100279535 100384368 100285035 100283640 100193229 100283462 100383523 100192501 100281949 542764 542370 103653276 100281538 100282741 541646 100281546 100191657 100281785 100303903 100283048 100274012 100194355 100282867 542722 1002…	GRMZM2G001724 pco084394 pco068646, GRMZM2G166537 GRMZM2G169486 cat2, Cat0, Ct2, GRMZM2G090568, ncr(cat2) GRMZM2G050481 GRMZM2G016774 GRMZM2G364369 hao1, GRMZM2G076239 GRMZM2G052389 pco095461, GRMZM2G106928 TIDP2980, GRMZM2G101875, gpm13 GRMZM2G359559 go1, GRMZM2G129246 GRMZM2G050984 GRMZM2G011269 pco110845, GRMZM2G363460 GRMZM2G116714 pco143515, GRMZM2G052266 GRMZM2G152127 GRMZM5G848768 pco084394…
Sulfur metabolism	20		Sulfur metabolism	20	48	0.137171	0.932382	Zm00001d023698 Zm00001d008379 Zm00001d033981 Zm00001d045340 Zm00001d038737 Zm00001d040235 Zm00001d021762 Zm00001d027536 Zm00001d031617 Zm00001d021877 Zm00001d029324 Zm00001d043101 Zm00001d031024 Zm00001d045327 Zm00001d028220 Zm00001d042600 Zm00001d004513 Zm00001d043941 Zm00001d048150 Zm00001d006645	zma:542492 zma:100280321 zma:103643994 zma:103638081 zma:541958 zma:100272829 zma:100857094 zma:103631673 zma:103642918 zma:100217102 zma:541650 zma:103651084 zma:100275494 zma:100502310 zma:100193476 zma:100277932 zma:100281036 zma:100283164 zma:100276991 zma:100217102	542492 100280321 103643994 103638081 541958 100272829 100857094 103631673 103642918 100217102 541650 103651084 100275494 100502310 100193476 100277932 100281036 100283164 100276991 100217102	dnp1, DP1, GRMZM2G152757 cys1 GRMZM2G149952 GRMZM2G003289 sat1, GRMZM2G069203 GRMZM2G048740 GRMZM2G114739 GRMZM2G327406, ak1 cgs1, GRMZM2G075153 pco128327 GRMZM2G128744 GRMZM2G158147 IDP546 GRMZM5G895554 GRMZM2G327406, ak1
Cyanoamino acid metabolism	23		Cyanoamino acid metabolism	23	57	0.142245	0.932382	Zm00001d028199 Zm00001d042661 Zm00001d023994 Zm00001d049234 Zm00001d012247 Zm00001d017352 Zm00001d008628 Zm00001d041763 Zm00001d043348 Zm00001d030859 Zm00001d024891 Zm00001d033649 Zm00001d025847 Zm00001d046334 Zm00001d034017 Zm00001d034015 Zm00001d041777 Zm00001d041776 Zm00001d038272 Zm00001d043110 Zm00001d024037 Zm00001d014489 Zm00001d033651	zma:100192939 zma:100191532 zma:542414 zma:100192461 zma:100286146 zma:542573 zma:103634830 zma:100284975 zma:100274074 zma:100192461 zma:103641409 zma:100274288 zma:100272792 zma:103638611 zma:541703 zma:100191390 zma:103650610 zma:100174972 zma:100279291 zma:100501315 zma:732807 zma:100279909 zma:100284659	100192939 100191532 542414 100192461 100286146 542573 103634830 100284975 100274074 100192461 103641409 100274288 100272792 103638611 541703 100191390 103650610 100174972 100279291 100501315 732807 100279909 100284659	GRMZM2G015804 GRMZM2G452630 glu1, GRMZM2G016890, ZmGlu1, p60.1 CL9311_1, GRMZM2G113959, GRMZM2G171116 NIT1, GRMZM2G178517, ZmNIT1 GRMZM2G139600 GRMZM2G424857 GRMZM2G174699 cl1052_1, GRMZM2G118003 GRMZM2G031660 GRMZM2G138248 umc1721, GRMZM2G017186 exg1, GRMZM2G147687 GRMZM2G076946 GRMZM2G181259 GRMZM2G376416 glu2, GRMZM2G008247, ZmGlu2 GRMZM2G163544 pco134646
Ascorbate and aldarate metabolism	23		Ascorbate and aldarate metabolism	23	57	0.142245	0.932382	Zm00001d031494 Zm00001d008310 Zm00001d023652 Zm00001d004956 Zm00001d035337 Zm00001d005818 Zm00001d016802 Zm00001d045706 Zm00001d003983 Zm00001d033188 Zm00001d025047 Zm00001d028709 Zm00001d014674 Zm00001d053223 Zm00001d003643 Zm00001d002426 Zm00001d017786 Zm00001d042478 Zm00001d034072 Zm00001d024633 Zm00001d005347 Zm00001d047757 Zm00001d033110	zma:100383462 zma:100280816 zma:732776 zma:100381436 zma:100283852 zma:100282748 zma:100283135 zma:732806 zma:100282748 zma:100285497 zma:100282326 zma:100285887 zma:100382378 zma:100193965 zma:100194161 zma:100272974 zma:100193942 zma:100272546 zma:100279549 zma:100272772 zma:100501585 zma:100283822 zma:100283131	100383462 100280816 732776 100381436 100283852 100282748 100283135 732806 100282748 100285497 100282326 100285887 100382378 100193965 100194161 100272974 100193942 100272546 100279549 100272772 100501585 100283822 100283131	GRMZM2G047968 GRMZM2G029731 pco064579, GRMZM2G126002, GalDH cl277_1, GRMZM2G469969 GRMZM2G057186 GRMZM2G130440 pco111578, GRMZM2G006791 rf2, GRMZM2G058675 GRMZM2G130440 GRMZM2G004211 GRMZM2G116586 cl26634_1a, GRMZM2G460406 GRMZM2G120517 GRMZM2G156227 si946084h12, GRMZM2G359397, VTC2 TIDP3299, GRMZM2G328500 IDP52, GRMZM5G828229 GRMZM2G084881 GRMZM2G054300, GRMZM2G093346
Aminoacyl-tRNA biosynthesis	41		Aminoacyl-tRNA biosynthesis	41	111	0.147921	0.932382	Zm00001d037538 Zm00001d004871 Zm00001d013778 Zm00001d003879 Zm00001d034764 Zm00001d043508 Zm00001d034766 Zm00001d026544 Zm00001d002104 Zm00001d006322 Zm00001d043548 Zm00001d007369 Zm00001d045605 Zm00001d045604 Zm00001d018274 Zm00001d018870 Zm00001d048372 Zm00001d009271 Zm00001d003430 Zm00001d024493 Zm00001d053901 Zm00001d039816 Zm00001d002585 Zm00001d021507 Zm00001d039578 Zm00001d048174 Zm00001d0…	zma:100273441 zma:103645723 zma:100280510 zma:103643028 zma:103645723 zma:100272291 zma:103645723 zma:100272738 zma:100285129 zma:100192902 zma:100280209 zma:100272738 zma:103638191 zma:103638191 zma:100275420 zma:100283555 zma:100281059 zma:100281485 zma:100273682 zma:103641233 zma:100383787 zma:100382529 zma:100272402 zma:103633183 zma:100284312 zma:100272738 zma:100382190 zma:100381695 zma:103…	100273441 103645723 100280510 103643028 103645723 100272291 103645723 100272738 100285129 100192902 100280209 100272738 103638191 103638191 100275420 100283555 100281059 100281485 100273682 103641233 100383787 100382529 100272402 103633183 100284312 100272738 100382190 100381695 103634773 100383787 103631953 103633183 100279253 103626016 100280495 100282839 103643444 103639438 100285944 542538 10…	GRMZM2G118062, GRMZM2G155899 GRMZM2G386714 GRMZM2G041797 GRMZM2G118062, GRMZM2G155899 pco069460, GRMZM2G177970 GRMZM2G118062, GRMZM2G155899 GRMZM2G172101 GRMZM2G002851 GRMZM2G172101 GRMZM5G805350 GRMZM5G805350 GRMZM2G107089 GRMZM2G057491 pco123869, GRMZM2G083836 GRMZM2G012404 GRMZM2G106974, GRMZM2G438602 GRMZM2G094123 GRMZM2G455085 GRMZM2G172101 GRMZM2G091560 GRMZM2G566786, GRMZM5G858471 GRMZM2G0…
Glutathione metabolism	50		Glutathione metabolism	50	139	0.154132	0.932382	Zm00001d002426 Zm00001d031494 Zm00001d037337 Zm00001d021470 Zm00001d032968 Zm00001d002263 Zm00001d046112 Zm00001d011154 Zm00001d012675 Zm00001d027557 Zm00001d031891 Zm00001d016802 Zm00001d027539 Zm00001d008628 Zm00001d029699 Zm00001d027540 Zm00001d019467 Zm00001d042098 Zm00001d029085 Zm00001d049187 Zm00001d015026 Zm00001d048353 Zm00001d033707 Zm00001d048354 Zm00001d025047 Zm00001d024839 Zm00001d0…	zma:100272974 zma:100383462 zma:100193273 zma:542490 zma:100502255 zma:103634379 zma:732743 zma:542632 zma:542366 zma:541842 zma:100280242 zma:100283135 zma:541829 zma:103634830 zma:541850 zma:541830 zma:100272866 zma:103650740 zma:103634626 zma:100856973 zma:100282933 zma:541831 zma:100216831 zma:542629 zma:100282326 zma:542311 zma:100283257 zma:542587 zma:100285887 zma:103637303 zma:100282090 z…	100272974 100383462 100193273 542490 100502255 103634379 732743 542632 542366 541842 100280242 100283135 541829 103634830 541850 541830 100272866 103650740 103634626 100856973 100282933 541831 100216831 542629 100282326 542311 100283257 542587 100285887 103637303 100282090 100280060 541986 541848 100193965 100194161 542026 542026 100383765 100191657 541828 100284317 103626044 100272844 100282747 …	GRMZM2G156227 GRMZM2G047968 GRMZM2G155546 gst16, GRMZM5G895383 GRMZM2G016241 spesyn, GRMZM2G047867, spds2 pco061770a, GRMZM2G077206 gst1, GRMZM2G116273 gst31, GRMZM2G475059 GRMZM2G389233 pco111578, GRMZM2G006791 gst11, GRMZM2G119499 GRMZM2G139600 GRMZM2G025190, gst42 gst12, GRMZM2G096269 GRMZM2G051771 GRMZM2G013299 pgd3 gst13, GRMZM2G126781 IDP340, GRMZM2G042040 gst9, GRMZM2G126763 GRMZM2G004211 …
Oxidative phosphorylation	60		Oxidative phosphorylation	60	170	0.156431	0.932382	Zm00001d052242 Zm00001d043834 Zm00001d031308 Zm00001d007048 Zm00001d046336 GRMZM5G874448 GRMZM5G800101 Zm00001d021721 Zm00001d050214 Zm00001d045139 Zm00001d006402 Zm00001d043619 GRMZM5G853723 Zm00001d028207 Zm00001d018197 Zm00001d026490 Zm00001d013324 Zm00001d036961 Zm00001d044459 GRMZM5G866223 Zm00001d027848 Zm00001d042969 Zm00001d005253 Zm00001d051564 Zm00001d041917 Zm00001d019605 Zm00001d01542…	zma:100281924 zma:103651342 zma:100192499 zma:100282384 zma:100286306 zma:845179 zma:845180 zma:100280574 zma:100383137 zma:101027208 zma:845170 zma:100192583 zma:845187 zma:100382574 zma:100272927 zma:542052 zma:100281877 zma:100282598 zma:103651601 zma:845188 zma:100193223 zma:103636525 zma:100282544 zma:100284187 zma:100216756 zma:845186 zma:103626681 zma:845174 zma:100216756 zma:845184 zma:84…	100281924 103651342 100192499 100282384 100286306 845179 845180 100280574 100383137 101027208 845170 100192583 845187 100382574 100272927 542052 100281877 100282598 103651601 845188 100193223 103636525 100282544 100284187 100216756 845186 103626681 845174 100216756 845184 845170 845190 100502233 845180 100282566 100283470 100283792 845170 101027208 100191555 100384526 845183 845187 103651601 8451…	GRMZM2G040209 GRMZM2G094497, vpp2 ndhA, ndh1, ZemaCp091 ndhB, ndh2, ZemaCp101 GRMZM2G019999 GRMZM2G148200 atpB, ZemaCp031 GRMZM2G069061 ndhH, ZemaCp092 ppp1, GRMZM2G090718 mha4, GRMZM2G006894 GRMZM2G181151 ndhI, frxB, ZemaCp090 GRMZM2G162776 GRMZM5G801793, GRMZM5G879240 GRMZM2G124103 gpm428a ndhG, ZemaCp089 GRMZM2G128877 atpI, ZemaCp017 ndhE, ndh4L, ZemaCp088 atpB, ZemaCp031 ndhK, ZemaCp028 GRMZM…
			Monoterpenoid biosynthesis	7	13	0.157862	0.932382	Zm00001d002845 Zm00001d002847 Zm00001d025924 Zm00001d025923 Zm00001d015053 Zm00001d053916 Zm00001d015054	zma:100191789 zma:100280419 zma:100282122 zma:100282122 zma:732758 zma:103654934 zma:732759	100191789 100280419 100282122 100282122 732758 103654934 732759	GRMZM2G354909 pco096967, GRMZM2G168976 pco096967, GRMZM2G168976 TPS2, GRMZM2G046615 TPS3, GRMZM2G064406
			Glyoxylate and dicarboxylate metabolism	40	110	0.170892	0.932382	Zm00001d031364 Zm00001d031349 Zm00001d042661 Zm00001d037514 Zm00001d029416 Zm00001d012247 Zm00001d052595 Zm00001d015497 Zm00001d044267 Zm00001d014030 Zm00001d008993 Zm00001d053684 Zm00001d002261 Zm00001d028260 Zm00001d043348 Zm00001d004894 Zm00001d034887 Zm00001d030859 Zm00001d033747 Zm00001d034241 Zm00001d022229 Zm00001d018810 Zm00001d024952 Zm00001d027511 Zm00001d050810 Zm00001d031379 Zm00001d0…	zma:103645124 zma:100281949 zma:100191532 zma:845212 zma:100282283 zma:100286146 zma:542212 zma:103646899 zma:103651518 zma:100280767 zma:100283723 zma:100194338 zma:100285987 zma:542520 zma:100274074 zma:542212 zma:100191272 zma:100192461 zma:542400 zma:100282134 zma:107305678 zma:100279535 zma:100281040 zma:542230 zma:100282207 zma:100281949 zma:542370 zma:845212 zma:103645133 zma:100192461 zma…	103645124 100281949 100191532 845212 100282283 100286146 542212 103646899 103651518 100280767 100283723 100194338 100285987 542520 100274074 542212 100191272 100192461 542400 100282134 107305678 100279535 100281040 542230 100282207 100281949 542370 845212 103645133 100192461 100274052 542401 541947 103638381 100193070 100193709 100282691 100381818 100285995 542710	GRMZM2G050481 pco084394 GRMZM2G452630 rbcL, ZemaCp032 GRMZM5G866758 CL9311_1, GRMZM2G113959, GRMZM2G171116 ssu1, SSu, rbcS, rbcs1 GRMZM2G467338 cl5118_1 hao1, GRMZM2G076239 GLN6, GS1-1, GS122 GRMZM2G424857 ssu1, SSu, rbcS, rbcs1 gln2, gs1-2 GRMZM2G072744 go1, GRMZM2G129246 aco2, GRMZM5G858454 cat2, Cat0, Ct2, GRMZM2G090568, ncr(cat2) pco084394 CAT3 rbcL, ZemaCp032 GRMZM2G359559 pco079415(520), GR…
			Pentose phosphate pathway	31	83	0.174602	0.932382	Zm00001d045326 Zm00001d046962 Zm00001d005925 Zm00001d053015 Zm00001d028562 Zm00001d042727 Zm00001d043563 Zm00001d013135 Zm00001d013428 Zm00001d049187 Zm00001d027841 Zm00001d045919 Zm00001d033746 Zm00001d032172 Zm00001d011965 Zm00001d018936 Zm00001d050428 Zm00001d045451 Zm00001d046942 Zm00001d017830 Zm00001d029502 Zm00001d005756 Zm00001d044211 Zm00001d003252 Zm00001d039499 Zm00001d033002 Zm00001d0…	zma:100285548 zma:100279513 zma:100382805 zma:100272845 zma:100284339 zma:100273700 zma:100281464 zma:100285298 zma:542721 zma:100856973 zma:100274365 zma:101027252 zma:542358 zma:100279231 zma:100284080 zma:100284771 zma:542583 zma:100279513 zma:100281068 zma:100193340 zma:100383765 zma:103647427 zma:103651489 zma:100284317 zma:100857010 zma:100280694 zma:100272744 zma:541700 zma:100383765 zma:1…	100285548 100279513 100382805 100272845 100284339 100273700 100281464 100285298 542721 100856973 100274365 101027252 542358 100279231 100284080 100284771 542583 100279513 100281068 100193340 100383765 103647427 103651489 100284317 100857010 100280694 100272744 541700 100383765 100273196 100191851	GRMZM2G033208 GRMZM2G076075 AY110170, GRMZM2G155253 pco073762 GRMZM5G879882 GRMZM5G874903 GRMZM2G109383 pgd3 GRMZM2G026807 GRMZM2G314094 GRMZM2G023289 GRMZM2G139360 IDP2350, GRMZM2G134256 pco087551, GRMZM2G456086 gpn1, GAPN GRMZM2G033208 GRMZM2G095287 pco110217, GRMZM2G123371 GRMZM2G127717 GRMZM2G130230 GRMZM2G132069 GRMZM2G009591 GRMZM2G038791 pgd2, GRMZM2G127798, PGD, pdh2 IDP1438 GRMZM2G450163
			Butanoate metabolism	14	33	0.177597	0.932382	Zm00001d050810 Zm00001d003522 Zm00001d053776 Zm00001d029416 Zm00001d002326 Zm00001d026293 Zm00001d015406 Zm00001d015445 Zm00001d031749 Zm00001d007288 Zm00001d044267 Zm00001d049380 Zm00001d017168 Zm00001d037507	zma:100282207 zma:100273302 zma:100284047 zma:100282283 zma:103645944 zma:100286148 zma:100280779 zma:100282236 zma:100501579 zma:100279727 zma:103651518 zma:100282236 zma:100381801 zma:103631410	100282207 100273302 100284047 100282283 103645944 100286148 100280779 100282236 100501579 100279727 103651518 100282236 100381801 103631410	GRMZM2G355906 GRMZM5G866758 GRMZM5G817886 GRMZM2G108125 GRMZM2G128114 GRMZM2G077215 GRMZM2G007647
			Carotenoid biosynthesis	19	48	0.187376	0.944373	Zm00001d052932 Zm00001d017766 Zm00001d027936 Zm00001d015651 Zm00001d003512 Zm00001d023655 Zm00001d005889 Zm00001d033377 Zm00001d025544 Zm00001d018488 Zm00001d007502 Zm00001d019124 Zm00001d026056 Zm00001d051556 Zm00001d051554 Zm00001d004021 Zm00001d025545 Zm00001d036345 Zm00001d029822	zma:100281747 zma:103627610 zma:542329 zma:100383002 zma:100285076 zma:100194203 zma:103647484 zma:100383768 zma:100285076 zma:103627895 zma:100281663 zma:542604 zma:732825 zma:103627610 zma:100383693 zma:100281366 zma:100285076 zma:100136882 zma:103637620	100281747 103627610 542329 100383002 100285076 100194203 103647484 100383768 100285076 103627895 100281663 542604 732825 103627610 100383693 100281366 100285076 100136882 103637620	GRMZM2G150363 pds1, GRMZM2G410515, Pds GRMZM2G127139 GRMZM2G011746 GRMZM2G002142 GRMZM2G127139 GRMZM5G837869 CRTISO2, GRMZM2G106531 zds1, GRMZM2G454952 HYD3, CrtR-B1, GRMZM2G152135 GRMZM2G150363 GRMZM2G179147 GRMZM2G027219 GRMZM2G127139 y1, GRMZM2G300348, PSY1, pb1 GRMZM2G143202
			Starch and sucrose metabolism	84	251	0.208533	0.997832	Zm00001d033917 Zm00001d028199 Zm00001d029313 Zm00001d044211 Zm00001d033910 Zm00001d023994 Zm00001d044854 Zm00001d052263 Zm00001d047797 Zm00001d005925 Zm00001d034017 Zm00001d027619 Zm00001d016708 Zm00001d039131 Zm00001d015570 Zm00001d007571 Zm00001d013428 Zm00001d021598 Zm00001d022192 Zm00001d042353 Zm00001d043469 Zm00001d043468 Zm00001d032311 Zm00001d020272 Zm00001d020396 Zm00001d028243 Zm00001d0…	zma:100285405 zma:100192939 zma:103639107 zma:103651489 zma:100101531 zma:542414 zma:100272656 zma:541656 zma:100193447 zma:100382805 zma:541703 zma:100281767 zma:542314 zma:542737 zma:103626734 zma:103648136 zma:542721 zma:100285928 zma:677667 zma:103650849 zma:103636651 zma:103651208 zma:103643324 zma:107546758 zma:103636651 zma:100191471 zma:100381522 zma:542358 zma:100272553 zma:103630641 zma…	100285405 100192939 103639107 103651489 100101531 542414 100272656 541656 100193447 100382805 541703 100281767 542314 542737 103626734 103648136 542721 100285928 677667 103650849 103636651 103651208 103643324 107546758 103636651 100191471 100381522 542358 100272553 103630641 103654087 103626734 542295 103653427 100284854 100101526 542711 100170240 100501315 100285259 100274288 100191846 103633411…	GRMZM2G147849 GRMZM2G015804 GRMZM2G012140 GRMZM2G391936 glu1, GRMZM2G016890, ZmGlu1, p60.1 gss1, zSSIIb gpm140, GRMZM2G165357 GRMZM2G076075 umc1721, GRMZM2G017186 pco104637, GRMZM2G450125 incw1, GRMZM2G139300 AGP2, GRMZM2G027955 GRMZM2G462613 GRMZM2G135195 GRMZM2G109383 GRMZM2G325008 si603015d01b, GRMZM5G840145, SRA GRMZM2G118462 GRMZM2G008226 GRMZM2G118462 GRMZM2G111324 pco094517, GRMZM2G013811 …
			Stilbenoid, diarylheptanoid and gingerol biosynthesis	10	23	0.213821	0.997832	Zm00001d012510 Zm00001d016471 Zm00001d037073 Zm00001d009858 Zm00001d039833 Zm00001d005607 Zm00001d017186 Zm00001d039837 Zm00001d052842 Zm00001d038555	zma:103636555 zma:100284998 zma:100274269 zma:100272801 zma:100279986 zma:100304329 zma:100194386 zma:100279982 zma:100286151 zma:100274274	103636555 100284998 100274269 100272801 100279986 100304329 100194386 100279982 100286151 100274274	GRMZM2G010468 GRMZM2G028677 GRMZM2G127251 GRMZM2G139874 GRMZM2G176446 gpm105, GRMZM2G035584 pco076728, GRMZM2G156816 GRMZM2G033952 GRMZM2G140817
			Carbon metabolism	121	372	0.232637	0.999975	Zm00001d031364 Zm00001d037514 Zm00001d037962 Zm00001d037961 Zm00001d030859 Zm00001d042840 Zm00001d012518 Zm00001d049641 Zm00001d031809 Zm00001d020426 Zm00001d049234 Zm00001d018936 Zm00001d035136 Zm00001d046962 Zm00001d025599 Zm00001d040235 Zm00001d025593 Zm00001d031899 Zm00001d016166 Zm00001d012702 Zm00001d027488 Zm00001d002454 Zm00001d003252 Zm00001d031403 Zm00001d037693 Zm00001d027727 Zm00001d0…	zma:103645124 zma:845212 zma:542331 zma:542331 zma:100192461 zma:100282017 zma:542578 zma:542367 zma:100284555 zma:100285796 zma:100192461 zma:100284771 zma:100502233 zma:100279513 zma:103641727 zma:100272829 zma:103641723 zma:542374 zma:542479 zma:542393 zma:542290 zma:100281866 zma:100284317 zma:103645133 zma:100284598 zma:100284817 zma:100274052 zma:542368 zma:100273700 zma:100193070 zma:10028…	103645124 845212 542331 542331 100192461 100282017 542578 542367 100284555 100285796 100192461 100284771 100502233 100279513 103641727 100272829 103641723 542374 542479 542393 542290 100281866 100284317 103645133 100284598 100284817 100274052 542368 100273700 100193070 100285995 100285548 100502310 103638081 541958 100191222 100286146 100280767 103631673 100285987 100856973 542212 100191272 10028…	GRMZM2G050481 rbcL, ZemaCp032 me2, GRMZM2G122479 me2, GRMZM2G122479 shbp1 pco072546, GRMZM5G833389, phosphoglycerate_mutase GAPC, GAPC1, GPC1 GRMZM2G141634 GRMZM2G121200 pco087551, GRMZM2G456086 GRMZM2G302259 GRMZM2G033208 GRMZM2G162845 GRMZM2G039723 mdh6, GRMZM2G129513 pep7, Ppc1C pep4, GRMZM2G473001, pep gpb1, GRMZM5G845611 si707035f08, GRMZM2G463280 GRMZM2G130230 GRMZM2G359559 GRMZM5G886257 gp…
			Phenylpropanoid biosynthesis	80	242	0.243169	0.999975	Zm00001d037359 Zm00001d003016 Zm00001d028199 Zm00001d007160 Zm00001d016182 Zm00001d043110 Zm00001d023994 Zm00001d033286 Zm00001d050417 Zm00001d022279 Zm00001d049541 Zm00001d039833 Zm00001d016185 Zm00001d038598 Zm00001d031635 Zm00001d009858 Zm00001d028349 Zm00001d027711 Zm00001d002346 Zm00001d022458 Zm00001d020808 Zm00001d032468 Zm00001d004443 Zm00001d047984 Zm00001d046184 Zm00001d047514 Zm00001d0…	zma:100191217 zma:542258 zma:100192939 zma:541674 zma:100279673 zma:100501315 zma:542414 zma:100285115 zma:542463 zma:103633479 zma:100125646 zma:100279986 zma:107546759 zma:107548102 zma:100192482 zma:100272801 zma:100280077 zma:100191850 zma:100191885 zma:100125639 zma:100282411 zma:103643375 zma:100216819 zma:103639386 zma:100280824 zma:100281052 zma:100284998 zma:103639570 zma:103639086 zma:1…	100191217 542258 100192939 541674 100279673 100501315 542414 100285115 542463 103633479 100125646 100279986 107546759 107548102 100192482 100272801 100280077 100191850 100191885 100125639 100282411 103643375 100216819 103639386 100280824 100281052 100284998 103639570 103639086 103635713 103637741 542735 103641409 100216632 100381820 100273454 100273263 100274288 100272792 542258 103637119 1036365…	TIDP3136, GRMZM2G095404 pal3, GRMZM2G074604, PAL1 GRMZM2G015804 GRMZM2G133475, PER66, POX3-2, PRX66, pmPOX3-2 GRMZM2G376416 glu1, GRMZM2G016890, ZmGlu1, p60.1 cncr1, CCR, GRMZM2G131205 GRMZM2G427903 comt GRMZM2G176446 GRMZM2G136534 GRMZM2G139874 GRMZM2G122787 cad1, GRMZM2G046070 PER70, GRMZM2G025441, POX2B, PRX70, pmPOX2b pco123006 GRMZM2G167613 uaz235(px), GRMZM2G471357 GRMZM2G015280 GRMZM2G0286…
			Other glycan degradation	10	24	0.244287	0.999975	Zm00001d006161 Zm00001d030282 Zm00001d030285 Zm00001d010050 Zm00001d038196 Zm00001d028235 Zm00001d007383 Zm00001d042066 Zm00001d005431 Zm00001d048988	zma:103647598 zma:103638174 zma:103638195 zma:103635582 zma:103630365 zma:100280178 zma:542217 zma:100217216 zma:103647301 zma:103652830	103647598 103638174 103638195 103635582 103630365 100280178 542217 100217216 103647301 103652830	GRMZM2G164945 GRMZM2G038973, GRMZM2G337242 GRMZM2G015143, GRMZM5G855776 GRMZM2G337616 GRMZM2G121514 GRMZM2G134251 AMA1, GRMZM2G172369 GRMZM2G105922
			Thiamine metabolism	6	13	0.262018	0.999975	Zm00001d033383 Zm00001d027505 Zm00001d020139 Zm00001d011183 Zm00001d044228 Zm00001d038170	zma:100285440 zma:103631588 zma:100282194 zma:542714 zma:542715 zma:606484	100285440 103631588 100282194 542714 542715 606484	cl574_1, GRMZM2G027663 GRMZM2G089092 pco084690, GRMZM2G322314 thi1, GRMZM2G018375, thi1-1 thi2, thi1-2 dxs1, GRMZM2G137151
			Nitrogen metabolism	18	50	0.295131	0.999975	Zm00001d052139 Zm00001d028260 Zm00001d043348 Zm00001d044096 Zm00001d044099 Zm00001d011610 Zm00001d051804 Zm00001d049995 Zm00001d011454 Zm00001d033747 Zm00001d052164 Zm00001d022388 Zm00001d017352 Zm00001d018161 Zm00001d031769 Zm00001d032736 Zm00001d020764 Zm00001d018206	zma:103654219 zma:542520 zma:100274074 zma:100285064 zma:100382491 zma:103636185 zma:542401 zma:542278 zma:100382491 zma:542400 zma:542264 zma:542710 zma:542573 zma:103627781 zma:103643134 zma:100284448 zma:100283312 zma:100383210	103654219 542520 100274074 100285064 100382491 103636185 542401 542278 100382491 542400 542264 542710 542573 103627781 103643134 100284448 100283312 100383210	GLN6, GS1-1, GS122 GRMZM2G424857 csu869(cah) umc2175 GRMZM2G077054 gln5, gs1-4 NAR1S, NR umc2175 gln2, gs1-2 gpm108b, GRMZM2G079381, NIR fgs1, GLSF, GRMZM2G036609, glutamate_synthase NIT1, GRMZM2G178517, ZmNIT1 GRMZM2G102959 GRMZM2G076723 cl3683_1, CYN, Cyanase GRMZM2G145101 DIA1, GRMZM5G878558, NR, nar
			Arachidonic acid metabolism	7	17	0.308998	0.999975	Zm00001d037079 Zm00001d029085 Zm00001d026154 Zm00001d034630 Zm00001d033683 Zm00001d008628 Zm00001d047448	zma:100272844 zma:103634626 zma:100280060 zma:100382637 zma:100191566 zma:103634830 zma:100283257	100272844 103634626 100280060 100382637 100191566 103634830 100283257	GRMZM2G012479 GRMZM2G013299 GRMZM5G884600 pco135148, GRMZM2G155580 GRMZM2G139600 pco114914, GRMZM2G329144
			AGE-RAGE signaling pathway in diabetic complications	7	17	0.308998	0.999975	Zm00001d052273 Zm00001d015036 Zm00001d053899 Zm00001d038688 Zm00001d037911 Zm00001d047447 Zm00001d014906	zma:541930 zma:542094 zma:542094 zma:542017 zma:541774 zma:100191466 zma:103626494	541930 542094 542094 542017 541774 100191466 103626494	GTPase, GRMZM2G001953 rop9, GRMZM5G803949 rop9, GRMZM5G803949 rop6, GRMZM2G176217 rop3, GRMZM2G100505 GRMZM2G114354 GRMZM2G137435
			Galactose metabolism	27	80	0.333169	0.999975	Zm00001d031300 Zm00001d031303 Zm00001d045326 Zm00001d029341 Zm00001d016708 Zm00001d043563 Zm00001d013428 Zm00001d014674 Zm00001d005756 Zm00001d019163 Zm00001d021249 Zm00001d033746 Zm00001d028931 Zm00001d021421 Zm00001d042066 Zm00001d032172 Zm00001d020094 Zm00001d020093 Zm00001d029151 Zm00001d036608 Zm00001d016934 Zm00001d039512 Zm00001d044211 Zm00001d039499 Zm00001d019552 Zm00001d033002 Zm00001d0…	zma:606431 zma:103641497 zma:100285548 zma:100283171 zma:542314 zma:100281464 zma:542721 zma:100382378 zma:103647427 zma:100281159 zma:100193772 zma:542358 zma:606403 zma:100191846 zma:100217216 zma:100279231 zma:100283489 zma:100283489 zma:100501069 zma:103629642 zma:100383712 zma:100192075 zma:103651489 zma:100857010 zma:100191564 zma:100280694 zma:103644222	606431 103641497 100285548 100283171 542314 100281464 542721 100382378 103647427 100281159 100193772 542358 606403 100191846 100217216 100279231 100283489 100283489 100501069 103629642 100383712 100192075 103651489 100857010 100191564 100280694 103644222	GRMZM2G037265 GRMZM2G050177 GRMZM2G100452 incw1, GRMZM2G139300 GRMZM5G879882 GRMZM2G109383 GRMZM2G116586 GRMZM2G127717 GRMZM2G052336, IDP1704 GRMZM2G023289 GRMZM2G165919 csu815, GRMZM2G032003 GRMZM2G139360 gpm221a, GRMZM2G138410 gpm221a, GRMZM2G138410 GRMZM2G428518 GRMZM2G056629 si946063f09, GRMZM2G104081 GRMZM2G132069 GRMZM2G146463 GRMZM2G009591 GRMZM2G077181
			Tyrosine metabolism	16	46	0.351229	0.999975	Zm00001d018468 Zm00001d027996 Zm00001d033555 Zm00001d052321 Zm00001d045610 Zm00001d048736 Zm00001d016860 Zm00001d016441 Zm00001d033024 Zm00001d014659 Zm00001d003309 Zm00001d034739 Zm00001d000001 Zm00001d053663 Zm00001d046748 Zm00001d018386	zma:542459 zma:100273217 zma:100272625 zma:100284350 zma:100192757 zma:100191816 zma:542543 zma:100191283 zma:100274380 zma:100284546 zma:100383438 zma:100283765 zma:103641120 zma:100192485 zma:100281477 zma:100282625	542459 100273217 100272625 100284350 100192757 100191816 542543 100191283 100274380 100284546 100383438 100283765 103641120 100192485 100281477 100282625	fdh1, GRMZM5G824600, fdh pco147721a TIDP3450, GRMZM2G448446 cl405_1, GRMZM2G088847, mif IDP248, GRMZM2G154093 GRMZM2G006480 gst17 pco115235a GRMZM2G108514 GRMZM2G048672, mif pco118120, GRMZM2G147884 pco067797, GRMZM2G156516 GRMZM5G851266 GRMZM2G029566 GRMZM2G108103 GRMZM5G836910
			Non-homologous end-joining	4	9	0.351648	0.999975	Zm00001d007807 Zm00001d038855 Zm00001d012918 Zm00001d033955	zma:100381505 zma:732817 zma:732817 zma:100274394	100381505 732817 732817 100274394	FEN1, FEN-1, GRMZM2G121262, pco066214a FEN1, FEN-1, GRMZM2G121262, pco066214a GRMZM2G001869
			Riboflavin metabolism	6	15	0.35244	0.999975	Zm00001d010535 Zm00001d002034 Zm00001d027367 Zm00001d012707 Zm00001d023836 Zm00001d050844	zma:100282823 zma:100192579 zma:100191772 zma:100280513 zma:100284485 zma:100383821	100282823 100192579 100191772 100280513 100284485 100383821	GRMZM2G336908 GRMZM2G033219 PYRD, GRMZM2G320099 GRMZM2G027115 GRMZM2G097820
			Arginine and proline metabolism	26	78	0.356948	0.999975	Zm00001d020543 Zm00001d020544 Zm00001d054079 Zm00001d001883 Zm00001d046112 Zm00001d004287 Zm00001d005818 Zm00001d004288 Zm00001d019467 Zm00001d015026 Zm00001d003983 Zm00001d028172 Zm00001d029853 Zm00001d051056 Zm00001d012391 Zm00001d005159 Zm00001d025644 Zm00001d024281 Zm00001d051194 Zm00001d038689 Zm00001d045706 Zm00001d034124 Zm00001d033228 Zm00001d026586 Zm00001d042117 Zm00001d018386	zma:103632784 zma:100282888 zma:100381773 zma:100191603 zma:732743 zma:103646736 zma:100282748 zma:103646736 zma:100272866 zma:100282933 zma:100282748 zma:103632562 zma:100281186 zma:100283320 zma:100280719 zma:100282908 zma:100280344 zma:541983 zma:100193626 zma:100272740 zma:732806 zma:100283657 zma:100191445 zma:100384522 zma:606449 zma:100282625	103632784 100282888 100381773 100191603 732743 103646736 100282748 103646736 100272866 100282933 100282748 103632562 100281186 100283320 100280719 100282908 100280344 541983 100193626 100272740 732806 100283657 100191445 100384522 606449 100282625	GRMZM2G060369 IDP754, GRMZM2G461159 pco077065, GRMZM2G078033 spesyn, GRMZM2G047867, spds2 GRMZM2G050937 GRMZM2G130440 GRMZM2G050937 GRMZM2G051771 GRMZM2G130440 GRMZM2G153799 GRMZM2G053720 GRMZM2G366392 pco085448, GRMZM2G028535 pco075678, GRMZM2G064163 GRMZM2G064159 pao1, GRMZM2G034152, PAO, mpao1 AY110562 GRMZM2G176396 rf2, GRMZM2G058675 cl32377_1(260), GRMZM2G348578 GRMZM2G080828 TIDP3366, GRMZM…
			Terpenoid backbone biosynthesis	25	75	0.361003	0.999975	Zm00001d045159 Zm00001d027694 Zm00001d051416 Zm00001d029416 Zm00001d047906 Zm00001d043182 Zm00001d018377 Zm00001d008427 Zm00001d019629 Zm00001d054008 Zm00001d018034 Zm00001d017139 Zm00001d038170 Zm00001d033945 Zm00001d040163 Zm00001d042584 Zm00001d043555 Zm00001d020963 Zm00001d039142 Zm00001d002351 Zm00001d017540 Zm00001d006678 Zm00001d052903 Zm00001d033896 Zm00001d021929	zma:100193048 zma:100282721 zma:103653897 zma:100282283 zma:100282968 zma:100282760 zma:100282878 zma:103634738 zma:100283522 zma:100384063 zma:100283007 zma:542690 zma:606484 zma:103643980 zma:542023 zma:100272499 zma:100272584 zma:100191922 zma:100282721 zma:541974 zma:100502542 zma:100502523 zma:100280335 zma:100383164 zma:100502545	100193048 100282721 103653897 100282283 100282968 100282760 100282878 103634738 100283522 100384063 100283007 542690 606484 103643980 542023 100272499 100272584 100191922 100282721 541974 100502542 100502523 100280335 100383164 100502545	umc2219 GRMZM2G163809 GRMZM2G004131 GRMZM5G866758 GRMZM2G030839 umc2169, GRMZM5G859195 IDP726, GRMZM2G070351 GRMZM2G036290 GRMZM2G054803 pco077228, GRMZM2G105644 pco116062, GRMZM2G137409, Hds1 dxs1, GRMZM2G137151 GRMZM2G396451 IDP154, dxr si618008b02f, GRMZM5G856881 pco074498b GRMZM2G058095 GRMZM2G163809 tps1, GRMZM2G049538, KS, eks1 pco067553, GRMZM2G027059, HDR GRMZM2G102550
			Glycine, serine and threonine metabolism	36	111	0.373046	0.999975	Zm00001d031364 Zm00001d031349 Zm00001d042661 Zm00001d018969 Zm00001d049234 Zm00001d038460 Zm00001d012247 Zm00001d003309 Zm00001d005818 Zm00001d008993 Zm00001d003058 Zm00001d029083 Zm00001d050339 Zm00001d003983 Zm00001d030859 Zm00001d034452 Zm00001d032114 Zm00001d031809 Zm00001d020984 Zm00001d043780 Zm00001d031379 Zm00001d012518 Zm00001d002711 Zm00001d025862 Zm00001d026472 Zm00001d036496 Zm00001d0…	zma:103645124 zma:100281949 zma:100191532 zma:100856952 zma:100192461 zma:100384690 zma:100286146 zma:100383438 zma:100282748 zma:100283723 zma:100856948 zma:100501001 zma:100302679 zma:100282748 zma:100192461 zma:103644181 zma:100383999 zma:100284555 zma:100283462 zma:100283397 zma:100281949 zma:542578 zma:100216615 zma:100282861 zma:100501398 zma:778432 zma:100281928 zma:100384690 zma:103644703…	103645124 100281949 100191532 100856952 100192461 100384690 100286146 100383438 100282748 100283723 100856948 100501001 100302679 100282748 100192461 103644181 100383999 100284555 100283462 100283397 100281949 542578 100216615 100282861 100501398 778432 100281928 100384690 103644703 103645133 100284817 100274052 732842 541947 100193709 100381818	GRMZM2G050481 pco084394 GRMZM2G452630 GRMZM5G841619 GRMZM2G107739 CL9311_1, GRMZM2G113959, GRMZM2G171116 pco118120, GRMZM2G147884 GRMZM2G130440 gpm154, AMADH1 GRMZM2G130440 GRMZM2G015436 GRMZM2G073814 GRMZM2G141634 pco143515, GRMZM2G052266 GRMZM2G050570 pco084394 pco072546, GRMZM5G833389, phosphoglycerate_mutase GRMZM2G171556 GRMZM2G043887 GRMZM2G156162 si707066f01, GRMZM2G098423 GRMZM2G107739 GR…
			Valine, leucine and isoleucine biosynthesis	10	29	0.412129	0.999975	Zm00001d023243 Zm00001d002694 Zm00001d017467 Zm00001d002880 Zm00001d007288 Zm00001d028303 Zm00001d026675 Zm00001d015088 Zm00001d017168 Zm00001d053960	zma:100280499 zma:100192912 zma:100286245 zma:100284589 zma:100279727 zma:100281255 zma:100283376 zma:100284902 zma:100381801 zma:100193712	100280499 100192912 100286245 100284589 100279727 100281255 100283376 100284902 100381801 100193712	GRMZM2G130062 GRMZM2G055899 GRMZM5G840002 cl362_2b, GRMZM5G803490 GRMZM2G077215 GRMZM2G153536 GRMZM2G104613 GRMZM2G370852 GRMZM2G007647 PCO109372, GRMZM2G010044
			Glycerophospholipid metabolism	41	130	0.419571	0.999975	Zm00001d030117 Zm00001d043263 Zm00001d043401 Zm00001d042152 Zm00001d020612 Zm00001d038891 Zm00001d043228 Zm00001d005484 Zm00001d036718 Zm00001d043207 Zm00001d040265 Zm00001d014425 Zm00001d033683 Zm00001d043652 Zm00001d038366 Zm00001d005770 Zm00001d024343 Zm00001d046508 Zm00001d015399 Zm00001d015029 Zm00001d001903 Zm00001d048766 Zm00001d019218 Zm00001d002163 Zm00001d008493 Zm00001d040629 Zm00001d0…	zma:103637735 zma:100384658 zma:100284438 zma:100273469 zma:100193605 zma:100383478 zma:100284077 zma:103647321 zma:103634743 zma:100216900 zma:100281738 zma:100285746 zma:100191566 zma:100286064 zma:100191740 zma:103647433 zma:103654297 zma:100279815 zma:100191152 zma:100285552 zma:100285641 zma:100282234 zma:100383152 zma:100127510 zma:103634768 zma:100193648 zma:100273065 zma:100282545 zma:100…	103637735 100384658 100284438 100273469 100193605 100383478 100284077 103647321 103634743 100216900 100281738 100285746 100191566 100286064 100191740 103647433 103654297 100279815 100191152 100285552 100285641 100282234 100383152 100127510 103634768 100193648 100273065 100282545 100280298 103652775 103635415 103647629 103653268 100192922 100136826 100280012 542702 103630082 103648202 100279795 10…	cl9125_1, GRMZM2G452529 GRMZM2G155348 pco063192, GRMZM2G469409 GRMZM2G170400 pco109288 GRMZM2G145944 GRMZM5G871154 GRMZM2G349603 umc1286 GRMZM2G059637 GRMZM2G159125 umc2734, GRMZM2G085926 GRMZM2G466281 GRMZM2G064967 GRMZM2G063258 GRMZM2G106578 GRMZM2G095757 cl15598_1c, GRMZM2G096010, JD1 GRMZM2G090747 pco129777b, GRMZM2G060886 GRMZM2G100333 GRMZM2G015692 GRMZM2G108912 si605019d10, GRMZM2G087146 G…
			Glycerolipid metabolism	27	85	0.434427	0.999975	Zm00001d030117 Zm00001d043263 Zm00001d047849 Zm00001d018595 Zm00001d040265 Zm00001d014425 Zm00001d005818 Zm00001d009967 Zm00001d038366 Zm00001d018257 Zm00001d039953 Zm00001d003750 Zm00001d045706 Zm00001d003983 Zm00001d048766 Zm00001d002163 Zm00001d053149 Zm00001d020537 Zm00001d016731 Zm00001d028571 Zm00001d048835 Zm00001d035737 Zm00001d019552 Zm00001d028539 Zm00001d007714 Zm00001d047666 Zm00001d0…	zma:103637735 zma:100384658 zma:100283642 zma:100277683 zma:100281738 zma:100285746 zma:100282748 zma:100282424 zma:100191740 zma:100286172 zma:103646485 zma:103646485 zma:732806 zma:100282748 zma:100282234 zma:100127510 zma:100383181 zma:100274282 zma:100286172 zma:100277520 zma:103652775 zma:100274052 zma:100191564 zma:103634168 zma:103648202 zma:100279795 zma:100285585	103637735 100384658 100283642 100277683 100281738 100285746 100282748 100282424 100191740 100286172 103646485 103646485 732806 100282748 100282234 100127510 100383181 100274282 100286172 100277520 103652775 100274052 100191564 103634168 103648202 100279795 100285585	GRMZM2G117153 GRMZM2G477503 GRMZM2G130440 GRMZM2G053322 GRMZM2G059637 GRMZM2G092588 rf2, GRMZM2G058675 GRMZM2G130440 GRMZM2G106578 si486045a09, GRMZM2G175453 GRMZM2G142873 GRMZM2G092588 GRMZM2G160452 pco079415(520), GRMZM2G018786 GRMZM2G146463 GRMZM2G049190 GRMZM2G070304 GRMZM2G123987 GRMZM2G014981
			Vitamin B6 metabolism	5	14	0.45543	0.999975	Zm00001d043780 Zm00001d007936 Zm00001d018632 Zm00001d013845 Zm00001d027727	zma:100283397 zma:100280630 zma:100272732 zma:100193172 zma:100284817	100283397 100280630 100272732 100193172 100284817	GRMZM2G050570 GRMZM5G850015 GRMZM2G120652 magi108573, GRMZM2G022130, TIDP3042 gpm584, GRMZM2G300801, psat1
			Sulfur relay system	5	14	0.45543	0.999975	Zm00001d031024 Zm00001d027872 Zm00001d020139 Zm00001d018148 Zm00001d002755	zma:100275494 zma:100192515 zma:100282194 zma:100193637 zma:100280109	100275494 100192515 100282194 100193637 100280109	pco128327 pco084690, GRMZM2G322314 GRMZM2G402242 GRMZM2G347027
			Selenocompound metabolism	9	27	0.455865	0.999975	Zm00001d028038 Zm00001d011099 Zm00001d004513 Zm00001d029324 Zm00001d031128 Zm00001d013644 Zm00001d048081 Zm00001d053118 Zm00001d033981	zma:103631953 zma:541786 zma:100281036 zma:541650 zma:541942 zma:541714 zma:103639438 zma:100272704 zma:103643994	103631953 541786 100281036 541650 541942 541714 103639438 100272704 103643994	GRMZM2G029055 cl1511_1, GRMZM2G098031, GRMZM2G098039, MMT, MMT1 GRMZM2G158147 cgs1, GRMZM2G075153 csu503(met), GRMZM2G149751 TIDP2999, GRMZM2G112149 GRMZM2G143450 GRMZM5G889769 GRMZM2G149952
			Steroid biosynthesis	15	47	0.466535	0.999975	Zm00001d039965 Zm00001d028299 Zm00001d016463 Zm00001d019139 Zm00001d044120 Zm00001d053035 Zm00001d015234 Zm00001d011765 Zm00001d006889 Zm00001d039384 Zm00001d034516 Zm00001d029810 Zm00001d033867 Zm00001d040979 Zm00001d029454	zma:100282407 zma:100274333 zma:100282098 zma:541682 zma:100273258 zma:100283692 zma:100382426 zma:100282050 zma:100281352 zma:107305676 zma:100191601 zma:100282314 zma:103649921 zma:100217119 zma:100283692	100282407 100274333 100282098 541682 100273258 100283692 100382426 100282050 100281352 107305676 100191601 100282314 103649921 100217119 100283692	GRMZM2G091456 pco110886, GRMZM2G027886 SMT, ESMT1, GRMZM2G122810, smt1 GRMZM2G149224 GRMZM2G023798 GRMZM2G473533 GRMZM2G029396 gpm532, GRMZM2G127067 GRMZM2G062531 GRMZM2G149224
			Cysteine and methionine metabolism	42	137	0.480782	0.999975	Zm00001d026060 Zm00001d008379 Zm00001d020543 Zm00001d045327 Zm00001d010869 Zm00001d020544 Zm00001d038737 Zm00001d040220 Zm00001d038460 Zm00001d046112 Zm00001d029324 Zm00001d028303 Zm00001d013644 Zm00001d045340 Zm00001d027536 Zm00001d019467 Zm00001d029083 Zm00001d015026 Zm00001d043101 Zm00001d031024 Zm00001d031128 Zm00001d034241 Zm00001d022229 Zm00001d051056 Zm00001d014944 Zm00001d018976 Zm00001d0…	zma:100279981 zma:100280321 zma:103632784 zma:100502310 zma:100278365 zma:100282888 zma:541958 zma:100194257 zma:100384690 zma:732743 zma:541650 zma:100281255 zma:541714 zma:103638081 zma:103631673 zma:100272866 zma:100501001 zma:100282933 zma:103651084 zma:100275494 zma:541942 zma:100282134 zma:107305678 zma:100283320 zma:100282503 zma:103632028 zma:100279822 zma:100282908 zma:542026 zma:1002728…	100279981 100280321 103632784 100502310 100278365 100282888 541958 100194257 100384690 732743 541650 100281255 541714 103638081 103631673 100272866 100501001 100282933 103651084 100275494 541942 100282134 107305678 100283320 100282503 103632028 100279822 100282908 542026 100272829 542026 100384690 100286299 100382364 100192912 100191816 100191283 541827 541874 100193476 100280767 100282625	acs7, GRMZM5G894619 cys1 GRMZM2G060369 IDP754, GRMZM2G461159 sat1, GRMZM2G069203 IDP664 GRMZM2G107739 spesyn, GRMZM2G047867, spds2 cgs1, GRMZM2G075153 GRMZM2G153536 TIDP2999, GRMZM2G112149 GRMZM2G003289 GRMZM2G048740 GRMZM2G051771 pco128327 csu503(met), GRMZM2G149751 GRMZM2G072744 GRMZM2G366392 cl2158_1, GRMZM2G128929 GRMZM2G333916 pco075678, GRMZM2G064163 gsh1, GRMZM2G111579 gsh1, GRMZM2G111579 …
			Lysine degradation	13	41	0.4838	0.999975	Zm00001d005650 Zm00001d052079 Zm00001d045706 Zm00001d003983 Zm00001d029416 Zm00001d025258 Zm00001d019520 Zm00001d031858 Zm00001d005818 Zm00001d003947 Zm00001d047940 Zm00001d020984 Zm00001d025240	zma:103647380 zma:541648 zma:732806 zma:100282748 zma:100282283 zma:100280624 zma:103647308 zma:100382441 zma:100282748 zma:100383579 zma:100273874 zma:100283462 zma:100383579	103647380 541648 732806 100282748 100282283 100280624 103647308 100382441 100282748 100383579 100273874 100283462 100383579	GRMZM2G300955 lkrsdh1, GRMZM2G181362 rf2, GRMZM2G058675 GRMZM2G130440 GRMZM5G866758 GRMZM2G079538 GRMZM2G025924 GRMZM2G165011 GRMZM2G130440 GRMZM2G142863 GRMZM2G147534 pco143515, GRMZM2G052266 GRMZM2G142863
			Histidine metabolism	9	28	0.492135	0.999975	Zm00001d008310 Zm00001d005818 Zm00001d045706 Zm00001d003983 Zm00001d016720 Zm00001d038142 Zm00001d034343 Zm00001d020908 Zm00001d050694	zma:100280816 zma:100282748 zma:732806 zma:100282748 zma:103627258 zma:100284229 zma:100284964 zma:100193253 zma:103653609	100280816 100282748 732806 100282748 103627258 100284229 100284964 100193253 103653609	GRMZM2G029731 GRMZM2G130440 rf2, GRMZM2G058675 GRMZM2G130440 GRMZM2G451314 pco071947(363), GRMZM2G022252 pco067414 GRMZM2G068862
			Biosynthesis of amino acids	111	371	0.529364	0.999975	Zm00001d008310 Zm00001d011610 Zm00001d049234 Zm00001d013644 Zm00001d028536 Zm00001d030859 Zm00001d023429 Zm00001d049641 Zm00001d046168 Zm00001d031809 Zm00001d024754 Zm00001d018936 Zm00001d043780 Zm00001d046962 Zm00001d014737 Zm00001d025862 Zm00001d040235 Zm00001d035443 Zm00001d027727 Zm00001d020008 Zm00001d028712 Zm00001d042117 Zm00001d018386 Zm00001d045326 Zm00001d045327 Zm00001d045340 Zm00001d0…	zma:100280816 zma:103636185 zma:100192461 zma:541714 zma:101027130 zma:100192461 zma:100273126 zma:542367 zma:100276497 zma:100284555 zma:100279822 zma:100284771 zma:100283397 zma:100279513 zma:100284089 zma:100282861 zma:100272829 zma:103629163 zma:100284817 zma:100382674 zma:100281744 zma:606449 zma:100282625 zma:100285548 zma:100502310 zma:103638081 zma:541958 zma:100191222 zma:100286146 zma:1…	100280816 103636185 100192461 541714 101027130 100192461 100273126 542367 100276497 100284555 100279822 100284771 100283397 100279513 100284089 100282861 100272829 103629163 100284817 100382674 100281744 606449 100282625 100285548 100502310 103638081 541958 100191222 100286146 100282748 100285298 100284902 542520 103647427 100279231 100280719 542286 100384793 100193705 100191657 100282849 732842 …	GRMZM2G029731 GRMZM2G077054 TIDP2999, GRMZM2G112149 GRMZM2G161337 GRMZM2G020446 GAPC, GAPC1, GPC1 GRMZM2G324297 GRMZM2G141634 pco087551, GRMZM2G456086 GRMZM2G050570 GRMZM2G033208 GRMZM2G085117 GRMZM2G043887 GRMZM2G119583 gpm584, GRMZM2G300801, psat1 GRMZM2G106950 gpm121, GRMZM2G141273 p5cr, GRMZM2G068665 GRMZM5G836910 GRMZM2G003289 sat1, GRMZM2G069203 GRMZM5G852968 CL9311_1, GRMZM2G113959, GRMZM2…
			Glycosaminoglycan degradation	5	16	0.552703	0.999975	Zm00001d038196 Zm00001d041511 Zm00001d030791 Zm00001d002046 Zm00001d028235	zma:103630365 zma:100192026 zma:103640342 zma:103639124 zma:100280178	103630365 100192026 103640342 103639124 100280178	GRMZM2G121514 cl10629_-1b, GRMZM2G098397 GRMZM2G480451 GRMZM2G033592 GRMZM2G134251
			Linoleic acid metabolism	5	16	0.552703	0.999975	Zm00001d042541 Zm00001d053675 Zm00001d033624 Zm00001d002000 Zm00001d033683	zma:541856 zma:100037809 zma:100037803 zma:100037805 zma:100191566	541856 100037809 100037803 100037805 100191566	LOX, GRMZM2G156861 lox10 LOX4, GRMZM2G109056 lox6, GRMZM2G040095
			Fatty acid metabolism	32	108	0.558289	0.999975	Zm00001d051636 Zm00001d029416 Zm00001d017841 Zm00001d049975 Zm00001d045606 Zm00001d039856 Zm00001d045817 Zm00001d047255 Zm00001d022144 Zm00001d004125 Zm00001d049363 Zm00001d018487 Zm00001d014294 Zm00001d009182 Zm00001d023238 Zm00001d053127 Zm00001d042344 Zm00001d052485 Zm00001d024998 Zm00001d018846 Zm00001d050992 Zm00001d024273 Zm00001d010536 Zm00001d046454 Zm00001d006866 Zm00001d034832 Zm00001d0…	zma:100282744 zma:100282283 zma:100381639 zma:100193519 zma:100382424 zma:100274548 zma:103638302 zma:100383498 zma:100193451 zma:542319 zma:100501714 zma:100192501 zma:542319 zma:100285945 zma:100281538 zma:100281785 zma:100191672 zma:100281546 zma:100037775 zma:103633692 zma:103653730 zma:100382139 zma:100284318 zma:100281497 zma:100193451 zma:103644323 zma:100284647 zma:100279270 zma:100383523…	100282744 100282283 100381639 100193519 100382424 100274548 103638302 100383498 100193451 542319 100501714 100192501 542319 100285945 100281538 100281785 100191672 100281546 100037775 103633692 103653730 100382139 100284318 100281497 100193451 103644323 100284647 100279270 100383523 100283843 100280714 100284999	GRMZM5G866758 GRMZM2G161792 gpm519, GRMZM2G070422 GRMZM2G052389 GRMZM2G151087 GRMZM2G465868 csu43 pco121523, GRMZM2G124335 ACC1, GRMZM5G858094 GRMZM5G848768 ACC1, GRMZM5G858094 GRMZM2G132903 GRMZM2G176546 pco146226a, GRMZM2G104847 gpm375a, GRMZM5G852502 GRMZM2G059381 acc1 GRMZM2G073929 gl8b GRMZM2G119305 cl20712_1(629), GRMZM2G035202 GRMZM2G406603 pco121523, GRMZM2G124335 GRMZM2G016774 si496011d0…
			Amino sugar and nucleotide sugar metabolism	55	186	0.563757	0.999975	Zm00001d028572 Zm00001d013751 Zm00001d028825 Zm00001d018965 Zm00001d033910 Zm00001d027525 Zm00001d047797 Zm00001d014842 Zm00001d005925 Zm00001d013428 Zm00001d039131 Zm00001d007571 Zm00001d014689 Zm00001d028952 Zm00001d029794 Zm00001d009967 Zm00001d001979 Zm00001d012433 Zm00001d018966 Zm00001d020093 Zm00001d049804 Zm00001d014840 Zm00001d050032 Zm00001d033188 Zm00001d042943 Zm00001d009908 Zm00001d0…	zma:100274383 zma:100274298 zma:100304323 zma:100280478 zma:100101531 zma:100281825 zma:100193447 zma:542243 zma:100382805 zma:542721 zma:542737 zma:103648136 zma:103626414 zma:103634588 zma:100191592 zma:100282424 zma:100285211 zma:103636518 zma:100274481 zma:100283489 zma:100284577 zma:100283208 zma:542295 zma:100285497 zma:100284854 zma:100272553 zma:100193772 zma:542358 zma:100285419 zma:1001…	100274383 100274298 100304323 100280478 100101531 100281825 100193447 542243 100382805 542721 542737 103648136 103626414 103634588 100191592 100282424 100285211 103636518 100274481 100283489 100284577 100283208 542295 100285497 100284854 100272553 100193772 542358 100285419 100191846 100279549 542761 100282677 100283489 100382378 103640332 100383496 100191620 103630365 100192075 100280178 1036514…	GRMZM2G160506 GRMZM2G087326 GRMZM2G000632 GRMZM2G328171 GRMZM2G391936 gpm140, GRMZM2G165357 GRMZM2G389582, chitinase3, uiu6(chn) GRMZM2G076075 GRMZM2G109383 AGP2, GRMZM2G027955 GRMZM2G135195 GRMZM2G098900 GRMZM2G180889 GRMZM2G099454 GRMZM2G053322 GRMZM2G173341 GRMZM2G370048 GRMZM2G162359 gpm221a, GRMZM2G138410 pco104428a, GRMZM2G064360 agpsl1, ADPG-PPase, GRMZM2G163437 GRMZM2G007404 GRMZM2G052336…
			Ether lipid metabolism	11	37	0.566882	0.999975	Zm00001d046508 Zm00001d006257 Zm00001d015029 Zm00001d005484 Zm00001d040629 Zm00001d042057 Zm00001d037643 Zm00001d008727 Zm00001d033683 Zm00001d036718 Zm00001d005770	zma:100279815 zma:103647629 zma:100285552 zma:103647321 zma:100193648 zma:100280012 zma:103630082 zma:542702 zma:100191566 zma:103634743 zma:103647433	100279815 103647629 100285552 103647321 100193648 100280012 103630082 542702 100191566 103634743 103647433	GRMZM2G108912 GRMZM2G466281 GRMZM2G145944 cl15598_1c, GRMZM2G096010, JD1 GRMZM2G479112 GRMZM2G438378 PLD1 GRMZM5G871154 GRMZM2G159125
			Flavonoid biosynthesis	13	44	0.571106	0.999975	Zm00001d047425 Zm00001d047424 Zm00001d012510 Zm00001d007403 Zm00001d016471 Zm00001d037073 Zm00001d009858 Zm00001d039833 Zm00001d005607 Zm00001d017186 Zm00001d039837 Zm00001d052842 Zm00001d038555	zma:103639113 zma:100278079 zma:103636555 zma:100282642 zma:100284998 zma:100274269 zma:100272801 zma:100279986 zma:100304329 zma:100194386 zma:100279982 zma:100286151 zma:100274274	103639113 100278079 103636555 100282642 100284998 100274269 100272801 100279986 100304329 100194386 100279982 100286151 100274274	GRMZM2G119067 GRMZM2G010468 GRMZM2G151227 GRMZM2G028677 GRMZM2G127251 GRMZM2G139874 GRMZM2G176446 gpm105, GRMZM2G035584 pco076728, GRMZM2G156816 GRMZM2G033952 GRMZM2G140817
			Fatty acid biosynthesis	20	68	0.573	0.999975	Zm00001d024273 Zm00001d049975 Zm00001d014294 Zm00001d053127 Zm00001d046454 Zm00001d034832 Zm00001d006866 Zm00001d022144 Zm00001d047255 Zm00001d023238 Zm00001d005148 Zm00001d024723 Zm00001d042344 Zm00001d052485 Zm00001d043851 Zm00001d024998 Zm00001d025170 Zm00001d004125 Zm00001d046808 Zm00001d036919	zma:100382139 zma:100193519 zma:542319 zma:100281785 zma:100281497 zma:103644323 zma:100193451 zma:100193451 zma:100383498 zma:100281538 zma:100284647 zma:100279270 zma:100191672 zma:100281546 zma:100383523 zma:100037775 zma:100283843 zma:542319 zma:100280714 zma:100284999	100382139 100193519 542319 100281785 100281497 103644323 100193451 100193451 100383498 100281538 100284647 100279270 100191672 100281546 100383523 100037775 100283843 542319 100280714 100284999	GRMZM2G119305 gpm519, GRMZM2G070422 ACC1, GRMZM5G858094 pco146226a, GRMZM2G104847 GRMZM2G406603 GRMZM2G016774 pco121523, GRMZM2G124335 pco121523, GRMZM2G124335 csu43 GRMZM2G176546 si496011d04, GRMZM2G017382 TIDP2980, GRMZM2G101875, gpm13 gpm375a, GRMZM5G852502 GRMZM2G059381 GRMZM2G152127 acc1 csu333 ACC1, GRMZM5G858094 pco142704, GRMZM2G022563 GRMZM2G079308
			Pyruvate metabolism	37	126	0.5769	0.999975	Zm00001d037961 Zm00001d015976 Zm00001d001881 Zm00001d029416 Zm00001d021070 Zm00001d037962 Zm00001d005818 Zm00001d004125 Zm00001d049049 Zm00001d045706 Zm00001d003983 Zm00001d034241 Zm00001d022229 Zm00001d053453 Zm00001d014944 Zm00001d016166 Zm00001d020426 Zm00001d004123 Zm00001d037775 Zm00001d021187 Zm00001d014294 Zm00001d031899 Zm00001d000133 Zm00001d012702 Zm00001d028471 Zm00001d024998 Zm00001d0…	zma:542331 zma:103626912 zma:100280536 zma:100282283 zma:542607 zma:542331 zma:100282748 zma:542319 zma:100191365 zma:732806 zma:100282748 zma:100282134 zma:107305678 zma:542479 zma:100282503 zma:542479 zma:100285796 zma:100280481 zma:100191237 zma:100216606 zma:542319 zma:542374 zma:103646525 zma:542393 zma:541622 zma:100037775 zma:100275430 zma:100284598 zma:103635678 zma:542233 zma:100280499 z…	542331 103626912 100280536 100282283 542607 542331 100282748 542319 100191365 732806 100282748 100282134 107305678 542479 100282503 542479 100285796 100280481 100191237 100216606 542319 542374 103646525 542393 541622 100037775 100275430 100284598 103635678 542233 100280499 100280786 100284493 100381818 542759 100191762 100280767	me2, GRMZM2G122479 GRMZM2G081268 GRMZM2G077541 GRMZM5G866758 GRMZM2G128121 me2, GRMZM2G122479 GRMZM2G130440 ACC1, GRMZM5G858094 pco109318, GRMZM2G124593 rf2, GRMZM2G058675 GRMZM2G130440 GRMZM2G072744 pep7, Ppc1C cl2158_1, GRMZM2G128929 pep7, Ppc1C GRMZM2G121200 GRMZM2G125310 AY110374, GRMZM2G120300 ACC1, GRMZM5G858094 mdh6, GRMZM2G129513 GRMZM2G157269 pep4, GRMZM2G473001, pep GRMZM2G001696 acc1 s…
			Lysine biosynthesis	8	27	0.578069	0.999975	Zm00001d047935 Zm00001d002602 Zm00001d003983 Zm00001d023429 Zm00001d005818 Zm00001d049956 Zm00001d000153 Zm00001d028810	zma:100280882 zma:100282239 zma:100282748 zma:100273126 zma:100282748 zma:100194039 zma:100273126 zma:100283445	100280882 100282239 100282748 100273126 100282748 100194039 100273126 100283445	GRMZM2G556131 GRMZM2G130440 GRMZM2G020446 GRMZM2G130440 GRMZM2G020446 GRMZM2G010328
			Phosphatidylinositol signaling system	29	99	0.580059	0.999975	Zm00001d043263 Zm00001d010649 Zm00001d008310 Zm00001d013442 Zm00001d043401 Zm00001d013393 Zm00001d005059 Zm00001d033853 Zm00001d038830 Zm00001d050219 Zm00001d043144 Zm00001d032238 Zm00001d043286 Zm00001d047447 Zm00001d014906 Zm00001d002163 Zm00001d053801 Zm00001d047618 Zm00001d029443 Zm00001d035004 Zm00001d049076 Zm00001d048913 Zm00001d033551 Zm00001d023698 Zm00001d020414 Zm00001d029209 Zm00001d0…	zma:100384658 zma:103635808 zma:100280816 zma:103625953 zma:100284438 zma:103627995 zma:103647156 zma:100194132 zma:103630655 zma:103653397 zma:100502442 zma:103643294 zma:103651148 zma:100191466 zma:103626494 zma:100127510 zma:100384405 zma:100281015 zma:103636073 zma:103628939 zma:103652867 zma:103655062 zma:103645542 zma:542492 zma:103632727 zma:103635048 zma:100281652 zma:100136826 zma:100283…	100384658 103635808 100280816 103625953 100284438 103627995 103647156 100194132 103630655 103653397 100502442 103643294 103651148 100191466 103626494 100127510 100384405 100281015 103636073 103628939 103652867 103655062 103645542 542492 103632727 103635048 100281652 100136826 100283131	GRMZM2G005557 GRMZM2G029731 GRMZM2G114162 cl9125_1, GRMZM2G452529 GRMZM2G158972 GRMZM2G103721 GRMZM2G092595 GRMZM2G114354 GRMZM2G137435 GRMZM2G106578 PCO088312 GRMZM2G033846 GRMZM2G111208 GRMZM2G040296 GRMZM2G176698 GRMZM2G022997, GRMZM2G101856 dnp1, DP1, GRMZM2G152757 GRMZM2G066876 GRMZM5G831486 cl27615_1, GRMZM2G076392 GRMZM2G087850
			Pantothenate and CoA biosynthesis	10	34	0.580712	0.999975	Zm00001d018946 Zm00001d002694 Zm00001d044985 Zm00001d045021 Zm00001d007288 Zm00001d017966 Zm00001d028303 Zm00001d017168 Zm00001d021297 Zm00001d027805	zma:100282565 zma:100192912 zma:100280926 zma:100192815 zma:100279727 zma:100274265 zma:100281255 zma:100381801 zma:103633092 zma:100194295	100282565 100192912 100280926 100192815 100279727 100274265 100281255 100381801 103633092 100194295	pco122135, GRMZM2G071294 GRMZM2G055899 cl35695_1, GRMZM5G808624 GRMZM2G077215 cl32009_1b, GRMZM2G181505 GRMZM2G153536 GRMZM2G007647 GRMZM2G104504 GRMZM2G407396
			Glycosphingolipid biosynthesis - ganglio series	2	6	0.583389	0.999975	Zm00001d038196 Zm00001d028235	zma:103630365 zma:100280178	103630365 100280178	GRMZM2G121514 GRMZM2G134251
			Lipoic acid metabolism	2	6	0.583389	0.999975	Zm00001d030944 Zm00001d043328	zma:100272694 zma:100384288	100272694 100384288	LIP1P-2, GRMZM2G101698
			Tryptophan metabolism	16	55	0.589605	0.999975	Zm00001d054044 Zm00001d025240 Zm00001d004467 Zm00001d045706 Zm00001d003983 Zm00001d027511 Zm00001d025005 Zm00001d013098 Zm00001d004287 Zm00001d005818 Zm00001d003947 Zm00001d017352 Zm00001d034387 Zm00001d004288 Zm00001d029416 Zm00001d008255	zma:542370 zma:100383579 zma:103646858 zma:732806 zma:100282748 zma:542230 zma:100281570 zma:542229 zma:103646736 zma:100282748 zma:100383579 zma:542573 zma:542228 zma:103646736 zma:100282283 zma:100282971	542370 100383579 103646858 732806 100282748 542230 100281570 542229 103646736 100282748 100383579 542573 542228 103646736 100282283 100282971	CAT3 GRMZM2G142863 GRMZM2G141383 rf2, GRMZM2G058675 GRMZM2G130440 cat2, Cat0, Ct2, GRMZM2G090568, ncr(cat2) GRMZM2G159393 cl1856_1, AO2, GRMZM2G124175, GRMZM5G899851, zmAO-2 GRMZM2G050937 GRMZM2G130440 GRMZM2G142863 NIT1, GRMZM2G178517, ZmNIT1 cl1856_2(520), AO1, GRMZM2G141535, zmAO-1 GRMZM2G050937 GRMZM5G866758 GRMZM2G019515
			alpha-Linolenic acid metabolism	16	55	0.589605	0.999975	Zm00001d018487 Zm00001d045606 Zm00001d027519 Zm00001d037182 Zm00001d035854 Zm00001d035767 Zm00001d050107 Zm00001d054067 Zm00001d040842 Zm00001d009182 Zm00001d053586 Zm00001d052827 Zm00001d033683 Zm00001d053675 Zm00001d044906 Zm00001d032049	zma:100192501 zma:100382424 zma:100274307 zma:732731 zma:101027254 zma:100191288 zma:732734 zma:542163 zma:732733 zma:100285945 zma:103654805 zma:100273465 zma:100191566 zma:100037809 zma:732822 zma:732830	100192501 100382424 100274307 732731 101027254 100191288 732734 542163 732733 100285945 103654805 100273465 100191566 100037809 732822 732830	GRMZM5G848768 GRMZM2G052389 GRMZM2G096020 opr3, GRMZM2G156712 GRMZM2G312997 opr8, GRMZM2G082087 hpl1, HPL, P450 opr6, GRMZM2G068947 GRMZM2G132903 lox10 opr2, GRMZM2G000236 pco088243a, GRMZM2G148281, OPR7
			Protein export	22	76	0.598374	0.999975	Zm00001d048028 Zm00001d012652 Zm00001d001882 Zm00001d034823 Zm00001d027293 Zm00001d008625 Zm00001d020694 Zm00001d039852 Zm00001d028272 Zm00001d042044 Zm00001d033317 Zm00001d025144 Zm00001d000350 Zm00001d038661 Zm00001d000349 Zm00001d012861 Zm00001d040686 Zm00001d023431 Zm00001d016036 Zm00001d014993 Zm00001d004707 Zm00001d052556	zma:100279882 zma:100274376 zma:100282410 zma:103625721 zma:100191673 zma:100285911 zma:100283156 zma:100284226 zma:100279882 zma:542753 zma:541788 zma:100384319 zma:542482 zma:103630576 zma:542482 zma:103625721 zma:542347 zma:100274153 zma:103626952 zma:732808 zma:103648919 zma:103654352	100279882 100274376 100282410 103625721 100191673 100285911 100283156 100284226 100279882 542753 541788 100384319 542482 103630576 542482 103625721 542347 100274153 103626952 732808 103648919 103654352	GRMZM2G093254 GRMZM2G079257 GRMZM2G167262 GRMZM2G136854 spr1, GRMZM2G060296 pco148010, GRMZM2G110063 pco112007, GRMZM2G024865 GRMZM2G093254 csr1 tha4, GRMZM2G472651, TATA csy1, GRMZM5G809546, SECY GRMZM2G060324 csy1, GRMZM5G809546, SECY GRMZM2G136854 tha1 si496035e06, GRMZM2G113093 GRMZM2G039930 bip1, BIPE2, GRMZM2G114793, b-70 GRMZM2G090020, GRMZM2G090086
			Glycosphingolipid biosynthesis - globo series	3	10	0.606691	0.999975	Zm00001d038196 Zm00001d019552 Zm00001d028235	zma:103630365 zma:100191564 zma:100280178	103630365 100191564 100280178	GRMZM2G121514 GRMZM2G146463 GRMZM2G134251
			Phenylalanine, tyrosine and tryptophan biosynthesis	21	73	0.607741	0.999975	Zm00001d014734 Zm00001d014737 Zm00001d049610 Zm00001d028536 Zm00001d003395 Zm00001d053374 Zm00001d018969 Zm00001d048736 Zm00001d016441 Zm00001d034713 Zm00001d025652 Zm00001d046168 Zm00001d034452 Zm00001d018386 Zm00001d015509 Zm00001d020008 Zm00001d006900 Zm00001d047896 Zm00001d018061 Zm00001d028712 Zm00001d052797	zma:100281038 zma:100284089 zma:732842 zma:101027130 zma:542286 zma:100194071 zma:100856952 zma:100191816 zma:100191283 zma:103625743 zma:100274566 zma:100276497 zma:103644181 zma:100282625 zma:100191856 zma:100382674 zma:103652654 zma:100272984 zma:100286040 zma:100281744 zma:100272293	100281038 100284089 732842 101027130 542286 100194071 100856952 100191816 100191283 103625743 100274566 100276497 103644181 100282625 100191856 100382674 103652654 100272984 100286040 100281744 100272293	GRMZM2G084942 GRMZM2G085117 orp1, TSB1 GRMZM2G161337 pco123247b, GRMZM2G325131 GRMZM5G841619 GRMZM2G006480 pco115235a GRMZM2G003109 GRMZM2G169516 GRMZM2G324297 GRMZM2G015436 GRMZM5G836910 GRMZM2G179454 GRMZM2G106950 pco087106a, GRMZM2G036861 GRMZM2G070218 gpm121, GRMZM2G141273 GRMZM5G828182
			Inositol phosphate metabolism	25	87	0.612427	0.999975	Zm00001d008310 Zm00001d013442 Zm00001d021310 Zm00001d035004 Zm00001d013393 Zm00001d033853 Zm00001d038830 Zm00001d050219 Zm00001d032238 Zm00001d047447 Zm00001d014906 Zm00001d023601 Zm00001d053801 Zm00001d008619 Zm00001d014292 Zm00001d029443 Zm00001d049076 Zm00001d023698 Zm00001d048201 Zm00001d042057 Zm00001d020414 Zm00001d029209 Zm00001d014911 Zm00001d036631 Zm00001d033110	zma:100280816 zma:103625953 zma:100191222 zma:103628939 zma:103627995 zma:100194132 zma:103630655 zma:103653397 zma:103643294 zma:100191466 zma:103626494 zma:100037797 zma:100384405 zma:100194114 zma:100384851 zma:103636073 zma:103652867 zma:542492 zma:100037797 zma:100280012 zma:103632727 zma:103635048 zma:100281652 zma:100136826 zma:100283131	100280816 103625953 100191222 103628939 103627995 100194132 103630655 103653397 103643294 100191466 103626494 100037797 100384405 100194114 100384851 103636073 103652867 542492 100037797 100280012 103632727 103635048 100281652 100136826 100283131	GRMZM2G029731 GRMZM2G114162 GRMZM5G852968 GRMZM2G040296 GRMZM2G158972 GRMZM2G103721 GRMZM2G092595 GRMZM2G114354 GRMZM2G137435 mips2, GRMZM2G004528 PCO088312 GRMZM2G018177 GRMZM2G111208 GRMZM2G176698 dnp1, DP1, GRMZM2G152757 mips2, GRMZM2G004528 GRMZM2G479112 GRMZM2G066876 GRMZM5G831486 cl27615_1, GRMZM2G076392 GRMZM2G087850
			Arginine biosynthesis	14	49	0.612991	0.999975	Zm00001d028260 Zm00001d033747 Zm00001d017676 Zm00001d051563 Zm00001d054079 Zm00001d051804 Zm00001d035443 Zm00001d017769 Zm00001d030557 Zm00001d032984 Zm00001d014258 Zm00001d006875 Zm00001d033328 Zm00001d018386	zma:542520 zma:542400 zma:100283456 zma:100284885 zma:100381773 zma:542401 zma:103629163 zma:100280306 zma:100193705 zma:100384793 zma:100282849 zma:100384793 zma:100191877 zma:100282625	542520 542400 100283456 100284885 100381773 542401 103629163 100280306 100193705 100384793 100282849 100384793 100191877 100282625	GLN6, GS1-1, GS122 gln2, gs1-2 pco121857a, GRMZM2G181273 gln5, gs1-4 GRMZM2G119583 GRMZM2G046748 GRMZM5G828630 GRMZM2G053939, GRMZM2G053999 uaz158(alt), GRMZM2G088064 GRMZM2G053939, GRMZM2G053999 GRMZM2G038848 GRMZM5G836910
			One carbon pool by folate	6	21	0.616336	0.999975	Zm00001d042661 Zm00001d049234 Zm00001d030859 Zm00001d012247 Zm00001d023534 Zm00001d020669	zma:100191532 zma:100192461 zma:100192461 zma:100286146 zma:100192785 zma:541944	100191532 100192461 100192461 100286146 100192785 541944	GRMZM2G452630 CL9311_1, GRMZM2G113959, GRMZM2G171116 GRMZM2G001904 GRMZM5G824944
			Base excision repair	14	50	0.638562	0.999975	Zm00001d021318 Zm00001d037258 Zm00001d005767 Zm00001d020505 Zm00001d028128 Zm00001d038855 Zm00001d012918 Zm00001d024509 Zm00001d016581 Zm00001d043835 Zm00001d036751 Zm00001d009231 Zm00001d026402 Zm00001d024423	zma:103633096 zma:107275233 zma:103649150 zma:103632764 zma:103632298 zma:732817 zma:732817 zma:100280534 zma:103627197 zma:103651343 zma:100273102 zma:103635146 zma:103642101 zma:103642510	103633096 107275233 103649150 103632764 103632298 732817 732817 100280534 103627197 103651343 100273102 103635146 103642101 103642510	GRMZM2G103458 GRMZM2G160738 FEN1, FEN-1, GRMZM2G121262, pco066214a FEN1, FEN-1, GRMZM2G121262, pco066214a GRMZM2G369260 GRMZM2G011631, GRMZM2G426847 TIDP2935, GRMZM2G169333 PARP, GRMZM2G099231, GRMZM2G124718 GRMZM2G480171
			Flavone and flavonol biosynthesis	2	7	0.651299	0.999975	Zm00001d047425 Zm00001d047424	zma:103639113 zma:100278079	103639113 100278079	GRMZM2G119067
			2-Oxocarboxylic acid metabolism	24	86	0.65989	0.999975	Zm00001d028303 Zm00001d026675 Zm00001d015497 Zm00001d032984 Zm00001d015088 Zm00001d053684 Zm00001d053960 Zm00001d024952 Zm00001d006875 Zm00001d046334 Zm00001d002880 Zm00001d035443 Zm00001d007288 Zm00001d030557 Zm00001d003083 Zm00001d014258 Zm00001d002694 Zm00001d017467 Zm00001d017676 Zm00001d023243 Zm00001d015856 Zm00001d017168 Zm00001d033328 Zm00001d018386	zma:100281255 zma:100283376 zma:103646899 zma:100384793 zma:100284902 zma:100194338 zma:100193712 zma:100281040 zma:100384793 zma:103638611 zma:100284589 zma:103629163 zma:100279727 zma:100193705 zma:100191657 zma:100282849 zma:100192912 zma:100286245 zma:100283456 zma:100280499 zma:100282691 zma:100381801 zma:100191877 zma:100282625	100281255 100283376 103646899 100384793 100284902 100194338 100193712 100281040 100384793 103638611 100284589 103629163 100279727 100193705 100191657 100282849 100192912 100286245 100283456 100280499 100282691 100381801 100191877 100282625	GRMZM2G153536 GRMZM2G104613 GRMZM2G467338 GRMZM2G053939, GRMZM2G053999 GRMZM2G370852 cl5118_1 PCO109372, GRMZM2G010044 aco2, GRMZM5G858454 GRMZM2G053939, GRMZM2G053999 GRMZM2G138248 cl362_2b, GRMZM5G803490 GRMZM2G119583 GRMZM2G077215 GRMZM5G828630 GRMZM2G082581 uaz158(alt), GRMZM2G088064 GRMZM2G055899 GRMZM5G840002 pco121857a, GRMZM2G181273 GRMZM2G130062 GRMZM2G007647 GRMZM2G038848 GRMZM5G836910
			Isoquinoline alkaloid biosynthesis	7	26	0.666666	0.999975	Zm00001d048736 Zm00001d016441 Zm00001d033024 Zm00001d046748 Zm00001d003309 Zm00001d000001 Zm00001d018386	zma:100191816 zma:100191283 zma:100274380 zma:100281477 zma:100383438 zma:103641120 zma:100282625	100191816 100191283 100274380 100281477 100383438 103641120 100282625	GRMZM2G006480 pco115235a GRMZM2G108514 GRMZM2G108103 pco118120, GRMZM2G147884 GRMZM5G851266 GRMZM5G836910
			beta-Alanine metabolism	15	55	0.673844	0.999975	Zm00001d003522 Zm00001d003309 Zm00001d015026 Zm00001d003983 Zm00001d028172 Zm00001d046112 Zm00001d017966 Zm00001d031749 Zm00001d045706 Zm00001d019467 Zm00001d005818 Zm00001d026586 Zm00001d024281 Zm00001d001883 Zm00001d005159	zma:100273302 zma:100383438 zma:100282933 zma:100282748 zma:103632562 zma:732743 zma:100274265 zma:100501579 zma:732806 zma:100272866 zma:100282748 zma:100384522 zma:541983 zma:100191603 zma:100282908	100273302 100383438 100282933 100282748 103632562 732743 100274265 100501579 732806 100272866 100282748 100384522 541983 100191603 100282908	GRMZM2G355906 pco118120, GRMZM2G147884 GRMZM2G130440 GRMZM2G153799 spesyn, GRMZM2G047867, spds2 cl32009_1b, GRMZM2G181505 rf2, GRMZM2G058675 GRMZM2G051771 GRMZM2G130440 TIDP3366, GRMZM2G150248 pao1, GRMZM2G034152, PAO, mpao1 pco077065, GRMZM2G078033 pco075678, GRMZM2G064163
			Fatty acid elongation	12	45	0.69151	0.999975	Zm00001d009354 Zm00001d017941 Zm00001d039856 Zm00001d027904 Zm00001d030343 Zm00001d010536 Zm00001d027766 Zm00001d045817 Zm00001d049363 Zm00001d018846 Zm00001d009608 Zm00001d050992	zma:100501899 zma:100279934 zma:100274548 zma:100283031 zma:103633519 zma:100284318 zma:103631752 zma:103638302 zma:100501714 zma:103633692 zma:100191621 zma:103653730	100501899 100279934 100274548 100283031 103633519 100284318 103631752 103638302 100501714 103633692 100191621 103653730	GRMZM2G151087 pco065510b, GRMZM2G445602 GRMZM2G149636 cl20712_1(629), GRMZM2G035202 GRMZM2G031790 GRMZM2G465868 GRMZM2G073929 pco084555(107), GRMZM2G393897 gl8b
			Cutin, suberine and wax biosynthesis	8	31	0.707764	0.999975	Zm00001d014055 Zm00001d042814 Zm00001d017952 Zm00001d028252 Zm00001d012326 Zm00001d000107 Zm00001d040188 Zm00001d017528	zma:100280261 zma:100192044 zma:100283710 zma:100285543 zma:100273463 zma:100285021 zma:100284056 zma:100192011	100280261 100192044 100283710 100285543 100273463 100285021 100284056 100192011	cl3929_1, CER1, GRMZM2G066578 cl308_1 GRMZM2G090505 GRMZM2G342685 GRMZM2G034360 GRMZM2G020500
			Sesquiterpenoid and triterpenoid biosynthesis	3	12	0.708203	0.999975	Zm00001d028299 Zm00001d034516 Zm00001d002351	zma:100274333 zma:100191601 zma:541974	100274333 100191601 541974	GRMZM2G091456 GRMZM2G029396 tps1, GRMZM2G049538, KS, eks1
			RNA polymerase	15	57	0.718024	0.999975	Zm00001d029055 Zm00001d041609 Zm00001d036307 Zm00001d035960 Zm00001d012557 GRMZM5G879235 Zm00001d046502 Zm00001d003203 Zm00001d046499 Zm00001d022141 Zm00001d000270 GRMZM5G877454 GRMZM5G899366 Zm00001d000362 Zm00001d054013	zma:100279825 zma:100284267 zma:845226 zma:103629391 zma:100286230 zma:845224 zma:845224 zma:103646285 zma:103626701 zma:100285329 zma:845225 zma:845225 zma:845226 zma:541967 zma:100191943	100279825 100284267 845226 103629391 100286230 845224 845224 103646285 103626701 100285329 845225 845225 845226 541967 100191943	GRMZM2G028132, GRMZM2G043456 umc1300, GRMZM2G046061 rpoC1, ZemaCp014 rpoA, ZemaCp054 rpoA, ZemaCp054 GRMZM2G080176, GRMZM2G178236 GRMZM2G144476 GRMZM5G898768 rpoB, ZemaCp013 rpoB, ZemaCp013 rpoC1, ZemaCp014 GRMZM2G044306, RPB1 si946076e12, GRMZM2G025356
			SNARE interactions in vesicular transport	13	51	0.745447	0.999975	Zm00001d018867 Zm00001d005751 Zm00001d034899 Zm00001d017772 Zm00001d033058 Zm00001d013323 Zm00001d039278 Zm00001d016077 Zm00001d031641 Zm00001d040286 Zm00001d026122 Zm00001d013996 Zm00001d008333	zma:100285646 zma:100282420 zma:103644161 zma:100282041 zma:100284137 zma:103625904 zma:103644161 zma:100283594 zma:100285634 zma:100191223 zma:100193453 zma:100191311 zma:100191223	100285646 100282420 103644161 100282041 100284137 103625904 103644161 100283594 100285634 100191223 100193453 100191311 100191223	GRMZM2G044527 GRMZM2G059106 GRMZM2G120596 GRMZM2G046244 GRMZM2G139744 GRMZM2G100478 GRMZM2G120596 pco131864(711), GRMZM2G300841 GRMZM2G436319 GRMZM2G017329 pco135291a, GRMZM2G003124 GRMZM2G162544 GRMZM2G017329
			Monobactam biosynthesis	5	21	0.750374	0.999975	Zm00001d002602 Zm00001d049956 Zm00001d033981 Zm00001d047935 Zm00001d004513	zma:100282239 zma:100194039 zma:103643994 zma:100280882 zma:100281036	100282239 100194039 103643994 100280882 100281036	GRMZM2G556131 GRMZM2G149952 GRMZM2G158147
			Tropane, piperidine and pyridine alkaloid biosynthesis	5	21	0.750374	0.999975	Zm00001d003309 Zm00001d048736 Zm00001d016441 Zm00001d007687 Zm00001d018386	zma:100383438 zma:100191816 zma:100191283 zma:100273624 zma:100282625	100383438 100191816 100191283 100273624 100282625	pco118120, GRMZM2G147884 GRMZM2G006480 pco115235a IDP610, GRMZM2G152258 GRMZM5G836910
			Brassinosteroid biosynthesis	3	13	0.750811	0.999975	Zm00001d004957 Zm00001d028325 Zm00001d052475	zma:100272666 zma:100217085 zma:100272666	100272666 100217085 100272666	umc1612 GRMZM2G107199 umc1612
			Fatty acid degradation	15	59	0.7583	0.999975	Zm00001d018487 Zm00001d018468 Zm00001d009182 Zm00001d045606 Zm00001d045706 Zm00001d003983 Zm00001d029416 Zm00001d053127 Zm00001d023238 Zm00001d027996 Zm00001d024723 Zm00001d052485 Zm00001d043851 Zm00001d005818 Zm00001d034832	zma:100192501 zma:542459 zma:100285945 zma:100382424 zma:732806 zma:100282748 zma:100282283 zma:100281785 zma:100281538 zma:100273217 zma:100279270 zma:100281546 zma:100383523 zma:100282748 zma:103644323	100192501 542459 100285945 100382424 732806 100282748 100282283 100281785 100281538 100273217 100279270 100281546 100383523 100282748 103644323	GRMZM5G848768 fdh1, GRMZM5G824600, fdh GRMZM2G132903 GRMZM2G052389 rf2, GRMZM2G058675 GRMZM2G130440 GRMZM5G866758 pco146226a, GRMZM2G104847 GRMZM2G176546 pco147721a TIDP2980, GRMZM2G101875, gpm13 GRMZM2G059381 GRMZM2G152127 GRMZM2G130440 GRMZM2G016774
			Purine metabolism	62	227	0.76636	0.999975	Zm00001d007656 Zm00001d042673 Zm00001d041609 Zm00001d037337 Zm00001d009411 Zm00001d012557 Zm00001d036307 Zm00001d021558 Zm00001d047603 Zm00001d009774 Zm00001d003203 Zm00001d023833 Zm00001d013428 Zm00001d026402 Zm00001d050533 GRMZM5G899366 Zm00001d049049 Zm00001d050150 Zm00001d038859 Zm00001d007186 GRMZM5G879235 Zm00001d046502 Zm00001d021877 Zm00001d033746 Zm00001d021526 Zm00001d022141 Zm00001d029…	zma:103649453 zma:100281060 zma:100284267 zma:100193273 zma:100383422 zma:100286230 zma:845226 zma:100217019 zma:100217081 zma:100283650 zma:103646285 zma:100283790 zma:542721 zma:103642101 zma:103655317 zma:845226 zma:100191365 zma:100382527 zma:100281518 zma:103647945 zma:845224 zma:845224 zma:100217102 zma:542358 zma:100381602 zma:100285329 zma:100384368 zma:100217102 zma:845225 zma:100502295 …	103649453 100281060 100284267 100193273 100383422 100286230 845226 100217019 100217081 100283650 103646285 100283790 542721 103642101 103655317 845226 100191365 100382527 100281518 103647945 845224 845224 100217102 542358 100381602 100285329 100384368 100217102 845225 100502295 100281242 100276991 100384174 100279825 100283207 103631588 103631988 100281175 100273583 100280534 103627197 100273769 …	umc1300, GRMZM2G046061 GRMZM2G155546 GRMZM2G003875 rpoC1, ZemaCp014 GRMZM5G895991 pco069028, GRMZM2G125893 GRMZM2G080176, GRMZM2G178236 GRMZM2G013478 GRMZM2G109383 GRMZM2G480171 rpoC1, ZemaCp014 pco109318, GRMZM2G124593 GRMZM2G088995, GRMZM5G899656 GRMZM2G003331 rpoA, ZemaCp054 rpoA, ZemaCp054 GRMZM2G327406, ak1 GRMZM2G023289 GRMZM2G134797 GRMZM5G898768 GRMZM2G050984 GRMZM2G327406, ak1 rpoB, Zema…
			Valine, leucine and isoleucine degradation	17	67	0.770152	0.999975	Zm00001d018487 Zm00001d023694 Zm00001d029083 Zm00001d009212 Zm00001d010970 Zm00001d045706 Zm00001d003983 Zm00001d029416 Zm00001d038460 Zm00001d017459 Zm00001d028303 Zm00001d038453 Zm00001d005818 Zm00001d040670 Zm00001d031013 Zm00001d050336 Zm00001d002694	zma:100192501 zma:100191513 zma:100501001 zma:100381818 zma:100382372 zma:732806 zma:100282748 zma:100282283 zma:100384690 zma:100284299 zma:100281255 zma:100384690 zma:100282748 zma:100283617 zma:100280665 zma:100281617 zma:100192912	100192501 100191513 100501001 100381818 100382372 732806 100282748 100282283 100384690 100284299 100281255 100384690 100282748 100283617 100280665 100281617 100192912	GRMZM5G848768 pco079304 GRMZM2G145595 GRMZM2G052630 rf2, GRMZM2G058675 GRMZM2G130440 GRMZM5G866758 GRMZM2G107739 GRMZM2G094655 GRMZM2G153536 GRMZM2G107739 GRMZM2G130440 GRMZM2G033644 pco103496(377) GRMZM2G055899
			Regulation of autophagy	13	53	0.785381	0.999975	Zm00001d052028 Zm00001d027415 Zm00001d021806 Zm00001d010743 Zm00001d020496 Zm00001d043389 Zm00001d007167 Zm00001d026335 Zm00001d026641 Zm00001d040567 Zm00001d029075 Zm00001d010811 Zm00001d050219	zma:103654173 zma:100217148 zma:103634395 zma:103635843 zma:100284454 zma:541785 zma:100281661 zma:100240695 zma:100240690 zma:100037796 zma:100280494 zma:100192108 zma:103653397	103654173 100217148 103634395 103635843 100284454 541785 100281661 100240695 100240690 100037796 100280494 100192108 103653397	gpm907b GRMZM2G062651 GRMZM2G096115 GRMZM2G129018 pk4, ZmPK4 GRMZM2G316136 IDP1471, Atg8b, GRMZM2G419694 Atg4a, GRMZM2G064212, GRMZM2G458441 cl63836_1, GRMZM2G044038 GRMZM2G103721
			Propanoate metabolism	10	42	0.792501	0.999975	Zm00001d023694 Zm00001d014294 Zm00001d014944 Zm00001d029416 Zm00001d000133 Zm00001d009212 Zm00001d004125 Zm00001d040670 Zm00001d024998 Zm00001d017258	zma:100191513 zma:542319 zma:100282503 zma:100282283 zma:103646525 zma:100381818 zma:542319 zma:100283617 zma:100037775 zma:100284286	100191513 542319 100282503 100282283 103646525 100381818 542319 100283617 100037775 100284286	pco079304 ACC1, GRMZM5G858094 cl2158_1, GRMZM2G128929 GRMZM5G866758 GRMZM2G157269 GRMZM2G145595 ACC1, GRMZM5G858094 GRMZM2G033644 acc1
			Taurine and hypotaurine metabolism	4	19	0.812353	0.999975	Zm00001d031749 Zm00001d003522 Zm00001d026556 Zm00001d008628	zma:100501579 zma:100273302 zma:100502253 zma:103634830	100501579 100273302 100502253 103634830	GRMZM2G355906 GRMZM2G107557 GRMZM2G139600
			Sphingolipid metabolism	12	51	0.817739	0.999975	Zm00001d019552 Zm00001d017748 Zm00001d019642 Zm00001d035537 Zm00001d009383 Zm00001d051345 Zm00001d044175 Zm00001d016993 Zm00001d042066 Zm00001d005431 Zm00001d050910 Zm00001d048988	zma:100191564 zma:100193352 zma:100384177 zma:103651320 zma:103632334 zma:100281194 zma:100279713 zma:100193560 zma:100217216 zma:103647301 zma:103653686 zma:103652830	100191564 100193352 100384177 103651320 103632334 100281194 100279713 100193560 100217216 103647301 103653686 103652830	GRMZM2G146463 GRMZM2G167431 IDP325, GRMZM2G043414 cl24314_1 GRMZM2G444643 GRMZM2G105922 GRMZM2G170868
			Fructose and mannose metabolism	24	96	0.818466	0.999975	Zm00001d045326 Zm00001d028572 Zm00001d037532 Zm00001d021310 Zm00001d053015 Zm00001d028562 Zm00001d042727 Zm00001d043563 Zm00001d005756 Zm00001d045919 Zm00001d022490 Zm00001d032172 Zm00001d031727 Zm00001d036091 Zm00001d008619 Zm00001d046942 Zm00001d017830 Zm00001d039512 Zm00001d007113 Zm00001d028045 Zm00001d039499 Zm00001d033002 Zm00001d023559 Zm00001d032386	zma:100285548 zma:100274383 zma:541911 zma:100191222 zma:100272845 zma:100284339 zma:100273700 zma:100281464 zma:103647427 zma:101027252 zma:100194128 zma:100279231 zma:100283066 zma:100282677 zma:100194114 zma:100281068 zma:100193340 zma:100192075 zma:100194385 zma:100192721 zma:100857010 zma:100280694 zma:100273196 zma:100191851	100285548 100274383 541911 100191222 100272845 100284339 100273700 100281464 103647427 101027252 100194128 100279231 100283066 100282677 100194114 100281068 100193340 100192075 100194385 100192721 100857010 100280694 100273196 100191851	GRMZM2G160506 GRMZM2G021846, pfk1 GRMZM5G852968 AY110170, GRMZM2G155253 pco073762 GRMZM5G879882 GRMZM2G127717 GRMZM2G314094 pco103489b, GRMZM2G081682 GRMZM2G139360 sdh1, GRMZM2G175423 GRMZM2G074850 GRMZM2G018177 GRMZM2G095287 pco110217, GRMZM2G123371 si946063f09, GRMZM2G104081 GRMZM2G005493 GRMZM2G064841 GRMZM2G132069 GRMZM2G009591 IDP1438 GRMZM2G450163
			Glycosylphosphatidylinositol(GPI)-anchor biosynthesis	6	28	0.830028	0.999975	Zm00001d014968 Zm00001d014973 Zm00001d005370 Zm00001d005497 Zm00001d039727 Zm00001d027485	zma:100192477 zma:103626518 zma:100193858 zma:103633205 zma:100278194 zma:100280817	100192477 103626518 100193858 103633205 100278194 100280817	GRMZM2G000937 GRMZM2G164175 GRMZM2G048762 GRMZM2G022310 si605086d03
			Biosynthesis of unsaturated fatty acids	12	52	0.834422	0.999975	Zm00001d018487 Zm00001d024273 Zm00001d010536 Zm00001d039856 Zm00001d045606 Zm00001d051636 Zm00001d017841 Zm00001d045817 Zm00001d042344 Zm00001d025170 Zm00001d018846 Zm00001d050992	zma:100192501 zma:100382139 zma:100284318 zma:100274548 zma:100382424 zma:100282744 zma:100381639 zma:103638302 zma:100191672 zma:100283843 zma:103633692 zma:103653730	100192501 100382139 100284318 100274548 100382424 100282744 100381639 103638302 100191672 100283843 103633692 103653730	GRMZM5G848768 GRMZM2G119305 cl20712_1(629), GRMZM2G035202 GRMZM2G151087 GRMZM2G052389 GRMZM2G161792 GRMZM2G465868 gpm375a, GRMZM5G852502 csu333 GRMZM2G073929 gl8b
			Glycolysis / Gluconeogenesis	50	193	0.843833	0.999975	Zm00001d045326 Zm00001d021310 Zm00001d016934 Zm00001d005925 Zm00001d053015 Zm00001d028562 Zm00001d021070 Zm00001d043563 Zm00001d005818 Zm00001d013428 Zm00001d038579 Zm00001d049049 Zm00001d018468 Zm00001d005756 Zm00001d015383 Zm00001d045919 Zm00001d045706 Zm00001d003983 Zm00001d049641 Zm00001d033746 Zm00001d032172 Zm00001d014944 Zm00001d031809 Zm00001d020426 Zm00001d050428 Zm00001d008619 Zm00001d0…	zma:100285548 zma:100191222 zma:100383712 zma:100382805 zma:100272845 zma:100284339 zma:542607 zma:100281464 zma:100282748 zma:542721 zma:100281237 zma:100191365 zma:542459 zma:103647427 zma:100282981 zma:101027252 zma:732806 zma:100282748 zma:542367 zma:542358 zma:100279231 zma:100282503 zma:100284555 zma:100285796 zma:542583 zma:100194114 zma:542578 zma:103635817 zma:103634444 zma:100281068 zma…	100285548 100191222 100383712 100382805 100272845 100284339 542607 100281464 100282748 542721 100281237 100191365 542459 103647427 100282981 101027252 732806 100282748 542367 542358 100279231 100282503 100284555 100285796 542583 100194114 542578 103635817 103634444 100281068 100193340 103646525 100192075 103644703 103651489 100282752 100194404 100280922 100857010 541919 100280694 100283171 100282…	GRMZM5G852968 GRMZM2G056629 GRMZM2G076075 AY110170, GRMZM2G155253 GRMZM2G128121 GRMZM5G879882 GRMZM2G130440 GRMZM2G109383 GRMZM2G089136 pco109318, GRMZM2G124593 fdh1, GRMZM5G824600, fdh GRMZM2G127717 pco070235b, GRMZM2G104632 GRMZM2G314094 rf2, GRMZM2G058675 GRMZM2G130440 GAPC, GAPC1, GPC1 GRMZM2G023289 GRMZM2G139360 cl2158_1, GRMZM2G128929 GRMZM2G141634 GRMZM2G121200 gpn1, GAPN GRMZM2G018177 pco…
			mRNA surveillance pathway	46	179	0.847385	0.999975	Zm00001d013485 Zm00001d026213 Zm00001d003796 Zm00001d051898 Zm00001d011885 Zm00001d011150 Zm00001d000023 Zm00001d051183 Zm00001d053565 Zm00001d037868 Zm00001d044552 Zm00001d050357 Zm00001d004779 Zm00001d017193 Zm00001d025714 Zm00001d021950 Zm00001d005502 Zm00001d022535 Zm00001d049642 Zm00001d006704 Zm00001d048336 Zm00001d044393 Zm00001d019920 Zm00001d011149 Zm00001d050266 Zm00001d009844 Zm00001d0…	zma:100283191 zma:103642014 zma:103635895 zma:542269 zma:100193201 zma:100384654 zma:100280286 zma:103627442 zma:100193694 zma:100281195 zma:100285191 zma:100280157 zma:100272317 zma:100283725 zma:100501635 zma:100279976 zma:100278146 zma:100274408 zma:100279734 zma:103647784 zma:100191189 zma:100383125 zma:100278146 zma:100384654 zma:100304199 zma:103635487 zma:100384700 zma:100280371 zma:100282…	100283191 103642014 103635895 542269 100193201 100384654 100280286 103627442 100193694 100281195 100285191 100280157 100272317 100283725 100501635 100279976 100278146 100274408 100279734 103647784 100191189 100383125 100278146 100384654 100304199 103635487 100384700 100280371 100282115 100280761 100282304 103627913 100382683 103647628 100282980 103627442 103641667 103646667 100285931 100283032 10…	GRMZM5G810275 GRMZM2G458283 GRMZM2G120178 prh1, GRMZM2G112240, PP1, ZmPP1 GRMZM2G060977 pco088497(644), GRMZM2G088218 GRMZM2G012761 GRMZM2G045720 IDP798 GRMZM2G171921 IDP601, GRMZM2G174919 gpm911, GRMZM2G052341 GRMZM2G058525 pco083367(678), GRMZM2G022313 GRMZM2G018775, pco062669 GRMZM2G470461 GRMZM2G049127 GRMZM2G014400 pco105718, GRMZM2G420926 IDP301, GRMZM2G142334 GRMZM2G018775, pco062669 pco08…
			Pentose and glucuronate interconversions	18	76	0.849004	0.999975	Zm00001d031727 Zm00001d014674 Zm00001d015328 Zm00001d045706 Zm00001d038794 Zm00001d050082 Zm00001d033188 Zm00001d008334 Zm00001d042556 Zm00001d032806 Zm00001d007113 Zm00001d022490 Zm00001d021421 Zm00001d027841 Zm00001d006929 Zm00001d022104 Zm00001d040649 Zm00001d034072	zma:100283066 zma:100382378 zma:100283618 zma:732806 zma:103630641 zma:100281178 zma:100285497 zma:100191701 zma:100273291 zma:100281581 zma:100194385 zma:100194128 zma:100191846 zma:100274365 zma:100282641 zma:103633411 zma:103650113 zma:100279549	100283066 100382378 100283618 732806 103630641 100281178 100285497 100191701 100273291 100281581 100194385 100194128 100191846 100274365 100282641 103633411 103650113 100279549	sdh1, GRMZM2G175423 GRMZM2G116586 pco073276b, GRMZM2G005562 rf2, GRMZM2G058675 GRMZM2G043943 GRMZM2G175499 GRMZM2G017555 GRMZM2G026855 GRMZM2G472060 GRMZM2G005493 pco103489b, GRMZM2G081682 csu815, GRMZM2G032003 GRMZM2G026807 GRMZM2G141510 GRMZM2G037411 TIDP3299, GRMZM2G328500
			ABC transporters	7	34	0.866399	0.999975	Zm00001d004442 Zm00001d025703 Zm00001d028671 Zm00001d019627 Zm00001d008178 Zm00001d029034 Zm00001d053706	zma:103646847 zma:103641772 zma:103644583 zma:103632317 zma:103650065 zma:103634613 zma:103654853	103646847 103641772 103644583 103632317 103650065 103634613 103654853	GRMZM2G167658 GRMZM2G111462 GRMZM2G401769 GRMZM2G077361 GRMZM2G032936, GRMZM2G317033
			Phagosome	37	149	0.870724	0.999975	Zm00001d049219 Zm00001d035004 Zm00001d029443 Zm00001d000349 Zm00001d021721 Zm00001d026623 Zm00001d033850 Zm00001d040286 Zm00001d038842 Zm00001d032238 Zm00001d050219 Zm00001d013139 Zm00001d036961 Zm00001d042969 Zm00001d005253 Zm00001d012170 Zm00001d046336 Zm00001d013612 Zm00001d000350 Zm00001d052273 Zm00001d020414 Zm00001d037911 Zm00001d033457 Zm00001d008984 Zm00001d007118 Zm00001d034899 Zm00001d0…	zma:100273000 zma:103628939 zma:103636073 zma:542482 zma:100280574 zma:100272336 zma:100037751 zma:100191223 zma:103630662 zma:103643294 zma:103653397 zma:103625832 zma:100282598 zma:103636525 zma:100282544 zma:100273288 zma:100286306 zma:100381283 zma:542482 zma:541930 zma:103632727 zma:541774 zma:542416 zma:100283666 zma:100283470 zma:103644161 zma:542094 zma:542094 zma:542017 zma:103644161 zma…	100273000 103628939 103636073 542482 100280574 100272336 100037751 100191223 103630662 103643294 103653397 103625832 100282598 103636525 100282544 100273288 100286306 100381283 542482 541930 103632727 541774 542416 100283666 100283470 103644161 542094 542094 542017 103644161 103626681 103626681 100381766 542248 542327 100193453 100191223	GRMZM2G166870 GRMZM2G040296 GRMZM2G111208 csy1, GRMZM5G809546, SECY GRMZM2G019999 magi9825, GRMZM2G042636, TIDP3158 TUA1, TUBA1 GRMZM2G017329 GRMZM2G090034 GRMZM2G092595 GRMZM2G103721 GRMZM5G853513 GRMZM2G181151 GRMZM5G801793, GRMZM5G879240 GRMZM2G124103 GRMZM2G028516 GRMZM2G094497, vpp2 csy1, GRMZM5G809546, SECY GTPase, GRMZM2G001953 GRMZM2G066876 rop3, GRMZM2G100505 tub3, GRMZM2G108766, TUBB3 G…
			Plant hormone signal transduction	94	355	0.875488	0.999975	Zm00001d048046 Zm00001d043634 Zm00001d038326 Zm00001d014682 Zm00001d008893 Zm00001d033464 Zm00001d016783 Zm00001d000408 Zm00001d015778 Zm00001d041416 Zm00001d037774 Zm00001d008957 Zm00001d036215 Zm00001d027523 Zm00001d053004 Zm00001d028552 Zm00001d042188 Zm00001d013707 Zm00001d033267 Zm00001d011588 Zm00001d048268 Zm00001d002143 Zm00001d012553 Zm00001d012128 Zm00001d013130 Zm00001d009714 Zm00001d0…	zma:541639 zma:103636232 zma:100274512 zma:103626407 zma:100193185 zma:100281007 zma:542190 zma:100281166 zma:100279520 zma:100284259 zma:100191581 zma:103649563 zma:100286386 zma:100273485 zma:103654551 zma:100281166 zma:100216611 zma:100274141 zma:100281419 zma:100284457 zma:100284541 zma:100502433 zma:542407 zma:103636390 zma:100384229 zma:100381512 zma:100127531 zma:100191257 zma:100273694 zm…	541639 103636232 100274512 103626407 100193185 100281007 542190 100281166 100279520 100284259 100191581 103649563 100286386 100273485 103654551 100281166 100216611 100274141 100281419 100284457 100284541 100502433 542407 103636390 100384229 100381512 100127531 100191257 100273694 100283151 103626666 100191211 100273108 100191986 103649560 100284319 103636232 100279991 100286212 541627 542407 1001…	RR10, GRMZM2G126834, ZmRR10 GRMZM2G048294 pco126351, GRMZM2G063961 GRMZM2G330012 GRMZM2G472625 GRMZM2G447151 GRMZM2G000278 si687013d08, GRMZM2G137582 TIDP3439 GRMZM2G147243 MPK7, GRMZM2G002100 si687013d08, GRMZM2G137582 pco137466(715), GRMZM2G128421 PIL5, GRMZM2G165042 umc2089, GRMZM2G036288 GRMZM2G131961 obf3.2, GRMZM2G125243 GRMZM2G100318 GRMZM2G065374 GRMZM2G091276 GRMZM2G024973, d9 pco137346,…
			Folate biosynthesis	4	22	0.882289	0.999975	Zm00001d048514 Zm00001d031995 Zm00001d039264 Zm00001d032529	zma:100285702 zma:100280848 zma:100192017 zma:100285702	100285702 100280848 100192017 100285702	GRMZM5G869779 cl315_1 GRMZM5G869779
			RNA transport	64	249	0.882679	0.999975	Zm00001d011149 Zm00001d048483 Zm00001d044116 Zm00001d030011 Zm00001d002166 Zm00001d022527 Zm00001d012044 Zm00001d011150 Zm00001d048023 Zm00001d007065 Zm00001d051183 Zm00001d044593 Zm00001d009868 Zm00001d015999 Zm00001d041988 Zm00001d028782 Zm00001d016627 Zm00001d038594 Zm00001d050357 Zm00001d046445 Zm00001d028262 Zm00001d015061 Zm00001d019423 Zm00001d012815 Zm00001d015754 Zm00001d024158 Zm00001d0…	zma:100384654 zma:100283954 zma:100286267 zma:100216593 zma:103646106 zma:100304359 zma:100281934 zma:100384654 zma:100384809 zma:100279429 zma:103627442 zma:101202711 zma:103635497 zma:103626926 zma:100283973 zma:100279728 zma:103628666 zma:100286322 zma:100280157 zma:100274502 zma:103632918 zma:100283402 zma:100276495 zma:103625708 zma:103626805 zma:100283675 zma:100282735 zma:100272886 zma:100…	100384654 100283954 100286267 100216593 103646106 100304359 100281934 100384654 100384809 100279429 103627442 101202711 103635497 103626926 100283973 100279728 103628666 100286322 100280157 100274502 103632918 100283402 100276495 103625708 103626805 100283675 100282735 100272886 100304252 542581 103629787 100273863 100283731 103646001 103633416 100381984 103633590 100384700 103646106 100192551 10…	pco088497(644), GRMZM2G088218 GRMZM2G180815 GRMZM2G174757 GRMZM2G084062 GRMZM2G053898 pco088497(644), GRMZM2G088218 TIDP3498, GRMZM2G058374, GRMZM2G358877 cl23032_-2, GRMZM2G059015 GRMZM2G151193 GRMZM2G418206 GRMZM2G058138 GRMZM5G861959 TIDP3683, GRMZM2G073535 GRMZM2G171921 pco119890, GRMZM2G022275 GRMZM2G144282 GRMZM2G104258 GRMZM2G022258 GRMZM2G056661 GRMZM2G063931 GRMZM2G006673 EF1-A, EF1A, GR…
			Zeatin biosynthesis	6	31	0.886269	0.999975	Zm00001d042147 Zm00001d002707 Zm00001d011890 Zm00001d019171 Zm00001d032046 Zm00001d036339	zma:542507 zma:100273251 zma:542056 zma:100158230 zma:100280446 zma:100174970	542507 100273251 542056 100158230 100280446 100174970	cko2, GRMZM2G050997 GRMZM2G120016 cko3, GRMZM2G167220 IPT4, GRMZM2G104559 CKX10, GRMZM2G348452 IPT, GRMZM2G102915
			Basal transcription factors	13	61	0.900545	0.999975	Zm00001d010476 Zm00001d036724 Zm00001d015415 Zm00001d030573 Zm00001d014337 Zm00001d006220 Zm00001d005736 Zm00001d041969 Zm00001d043797 Zm00001d046579 Zm00001d010711 Zm00001d020571 Zm00001d041766	zma:100272776 zma:100274161 zma:100193879 zma:100273074 zma:100282440 zma:100283348 zma:103634102 zma:100286346 zma:103651319 zma:103638720 zma:100216909 zma:100281967 zma:103650604	100272776 100274161 100193879 100273074 100282440 100283348 103634102 100286346 103651319 103638720 100216909 100281967 103650604	pco075430a, GRMZM2G149286 GRMZM2G005278 GRMZM2G147614 GRMZM2G045668, GRMZM2G107406 pco081507, GRMZM2G014180 GRMZM2G002828 GRMZM2G353885 umc2401, GRMZM2G470513 GRMZM2G042231, GRMZM2G343917, GRMZM2G394722 GRMZM2G060284 GRMZM2G120942
			Pyrimidine metabolism	43	176	0.904816	0.999975	Zm00001d050533 Zm00001d041609 Zm00001d051586 Zm00001d037337 Zm00001d012557 Zm00001d036307 Zm00001d046499 Zm00001d017966 Zm00001d041620 Zm00001d003203 Zm00001d023833 Zm00001d053118 Zm00001d038362 Zm00001d026402 Zm00001d009631 Zm00001d007186 Zm00001d046502 Zm00001d011192 Zm00001d022141 Zm00001d035916 Zm00001d021526 Zm00001d000270 Zm00001d039081 Zm00001d044024 Zm00001d029055 Zm00001d042005 Zm00001d0…	zma:103655317 zma:100284267 zma:100193467 zma:100193273 zma:100286230 zma:845226 zma:103626701 zma:100274265 zma:100280500 zma:103646285 zma:100283790 zma:100272704 zma:100284489 zma:103642101 zma:100382896 zma:103647945 zma:845224 zma:103636016 zma:100285329 zma:100281735 zma:100381602 zma:845225 zma:100382896 zma:100281709 zma:100279825 zma:100282859 zma:100273931 zma:103651512 zma:103631988 zm…	103655317 100284267 100193467 100193273 100286230 845226 103626701 100274265 100280500 103646285 100283790 100272704 100284489 103642101 100382896 103647945 845224 103636016 100285329 100281735 100381602 845225 100382896 100281709 100279825 100282859 100273931 103651512 103631988 100273583 100280534 103627197 100283650 845224 845225 103629391 103642510 100286008 103647945 100191943 845226 541967 …	umc1300, GRMZM2G046061 pco072185 GRMZM2G155546 rpoC1, ZemaCp014 GRMZM2G144476 cl32009_1b, GRMZM2G181505 GRMZM2G080176, GRMZM2G178236 GRMZM2G013478 GRMZM5G889769 gpm9, GRMZM2G059121 GRMZM2G480171 umc1385 GRMZM2G003331 rpoA, ZemaCp054 GRMZM2G700683 GRMZM5G898768 uck1, GRMZM2G141009 GRMZM2G134797 rpoB, ZemaCp013 umc1385 GRMZM2G132547 GRMZM2G028132, GRMZM2G043456 cl5001_1(636) GRMZM2G377761 GRMZM2G09…
			RNA degradation	43	176	0.904816	0.999975	Zm00001d045326 Zm00001d013912 Zm00001d040082 Zm00001d051678 Zm00001d048003 Zm00001d027278 Zm00001d015314 Zm00001d052307 Zm00001d043563 Zm00001d039400 Zm00001d002340 Zm00001d040311 Zm00001d005756 Zm00001d028409 Zm00001d035937 Zm00001d006036 Zm00001d045544 Zm00001d017883 Zm00001d051951 Zm00001d032172 Zm00001d043907 Zm00001d045590 Zm00001d041265 Zm00001d034013 Zm00001d018891 Zm00001d009522 Zm00001d0…	zma:100285548 zma:103628077 zma:103649879 zma:103654004 zma:103646034 zma:100383837 zma:100383871 zma:100384257 zma:100281464 zma:103649602 zma:100193338 zma:103649964 zma:103647427 zma:103633537 zma:103629384 zma:100286241 zma:542185 zma:103627664 zma:100282925 zma:100279231 zma:103651371 zma:103638180 zma:103653357 zma:103649879 zma:103631988 zma:100192964 zma:100282428 zma:100381661 zma:103653…	100285548 103628077 103649879 103654004 103646034 100383837 100383871 100384257 100281464 103649602 100193338 103649964 103647427 103633537 103629384 100286241 542185 103627664 100282925 100279231 103651371 103638180 103653357 103649879 103631988 100192964 100282428 100381661 103653357 100281429 103647171 100384536 100282437 100193137 100857010 100280694 103653357 103647171 103643788 103633568 10…	pco124991(180), GRMZM2G024882 GRMZM5G879882 Rcd1L4, GRMZM2G045331, GRMZM2G045331_T01 GRMZM2G127717 GRMZM2G042253 GRMZM2G095252, GRMZM2G133698 GRMZM2G365374 GRMZM2G083716 GRMZM2G029186 GRMZM2G139360 GRMZM2G040995 GRMZM2G377761 rph1, GRMZM2G345039 cl340_1, GRMZM2G054056 pco062058 umc1463, GRMZM2G010357 GRMZM2G146267 GRMZM5G802854 GRMZM5G886044 GRMZM2G132069 GRMZM2G009591 GRMZM2G146267 GRMZM2G340749…
			Limonene and pinene degradation	1	8	0.905815	0.999975	Zm00001d045706	zma:732806	732806	rf2, GRMZM2G058675
			Biotin metabolism	5	28	0.90699	0.999975	Zm00001d049975 Zm00001d047255 Zm00001d006866 Zm00001d026689 Zm00001d022144	zma:100193519 zma:100383498 zma:100193451 zma:100191565 zma:100193451	100193519 100383498 100193451 100191565 100193451	gpm519, GRMZM2G070422 csu43 pco121523, GRMZM2G124335 cl1004_1, GRMZM2G110932 pco121523, GRMZM2G124335
			Diterpenoid biosynthesis	5	30	0.931824	0.999975	Zm00001d032961 Zm00001d008909 Zm00001d039634 Zm00001d002349 Zm00001d017294	zma:542165 zma:100284370 zma:101202726 zma:103645955 zma:103627438	542165 100284370 101202726 103645955 103627438	an2, GRMZM2G044481 GRMZM2G152354 D1, GRMZM2G036340 GRMZM2G093603 GRMZM2G153359
			Synthesis and degradation of ketone bodies	1	10	0.944294	0.999975	Zm00001d029416	zma:100282283	100282283	GRMZM5G866758
			Plant-pathogen interaction	47	209	0.972437	0.999975	Zm00001d010649 Zm00001d017281 Zm00001d054079 Zm00001d011152 Zm00001d011392 Zm00001d005059 Zm00001d029558 Zm00001d038618 Zm00001d052653 Zm00001d051502 Zm00001d038762 Zm00001d003197 Zm00001d044411 Zm00001d042500 Zm00001d009883 Zm00001d013243 Zm00001d031332 Zm00001d007912 Zm00001d013109 Zm00001d047618 Zm00001d020722 Zm00001d009248 Zm00001d052066 Zm00001d030106 Zm00001d020609 Zm00001d010579 Zm00001d0…	zma:103635808 zma:103627435 zma:100381773 zma:103640123 zma:100286149 zma:103647156 zma:103636577 zma:100273558 zma:100136880 zma:103653932 zma:100101532 zma:100280813 zma:100381663 zma:103650887 zma:103640123 zma:100191751 zma:100384473 zma:103648263 zma:541988 zma:100281015 zma:100282485 zma:103635158 zma:100857056 zma:103640123 zma:103643238 zma:100283544 zma:100383746 zma:103625819 zma:100381…	103635808 103627435 100381773 103640123 100286149 103647156 103636577 100273558 100136880 103653932 100101532 100280813 100381663 103650887 103640123 100191751 100384473 103648263 541988 100281015 100282485 103635158 100857056 103640123 103643238 100283544 100383746 103625819 100381559 103635404 100286003 100383793 606485 542224 103654474 100273665 103655062 100502442 100383793 606408 100274717 1…	GRMZM2G005557 GRMZM2G068904 GRMZM2G025387 GRMZM2G304442 GRMZM2G078781 rbohD, p-au02f03, p-umc1051, umc1051 GRMZM2G081310 rbohC, GRMZM2G043435 GRMZM2G062673 GRMZM2G072052 GRMZM5G858887 pco153543(105), GRMZM2G024668, HSP90-1 GRMZM2G012326 cl146_1, GRMZM2G320506 GRMZM2G033846 GRMZM2G096271 GRMZM2G022547 GRMZM2G448185 GRMZM5G834697 GRMZM2G027351 GRMZM2G463464 GRMZM2G058305 pco121171 MRPR1 CDPK1, GRMZ…
			Spliceosome	61	269	0.982461	0.999975	Zm00001d034768 Zm00001d003014 Zm00001d039541 Zm00001d028804 Zm00001d051091 Zm00001d011150 Zm00001d047601 Zm00001d036301 Zm00001d037925 Zm00001d047498 Zm00001d010213 Zm00001d022243 Zm00001d029256 Zm00001d032319 Zm00001d012420 Zm00001d037602 Zm00001d028384 Zm00001d037625 Zm00001d050357 Zm00001d010529 Zm00001d017193 Zm00001d053882 Zm00001d048687 Zm00001d044510 Zm00001d051840 Zm00001d033704 Zm00001d0…	zma:100283145 zma:100280773 zma:107275236 zma:100383254 zma:100284255 zma:100384654 zma:100282531 zma:103629533 zma:100285019 zma:100217203 zma:100384862 zma:100285628 zma:100272550 zma:103643327 zma:100501536 zma:100277950 zma:100282785 zma:100383017 zma:100280157 zma:103635762 zma:100283725 zma:100277544 zma:103652717 zma:100383248 zma:103627913 zma:100286176 zma:100274600 zma:100383636 zma:100…	100283145 100280773 107275236 100383254 100284255 100384654 100282531 103629533 100285019 100217203 100384862 100285628 100272550 103643327 100501536 100277950 100282785 100383017 100280157 103635762 100283725 100277544 103652717 100383248 103627913 100286176 100274600 100383636 100193841 100384862 103642764 100286059 100384654 100284147 100281963 103638016 100281806 100274281 100384700 103635888…	GRMZM5G874478 si606066c12, GRMZM2G076399 pco088497(644), GRMZM2G088218 GRMZM2G068479 GRMZM2G433801 srp31, GRMZM2G170365, cl49267_1(600) srp32, GRMZM2G436092 GRMZM2G111596 SCL25B, GRMZM5G867185, pco120172 SCL28 GRMZM5G895175 cl6482_1b, GRMZM2G018020 GRMZM2G171921 GRMZM5G802801 gpm911, GRMZM2G052341 GRMZM2G410393 HSP70 IDP1480 GRMZM2G133764 GRMZM2G057394 GRMZM2G102447 GRMZM2G025281, si618042d11 GRM…
			Citrate cycle (TCA cycle)	18	98	0.98333	0.999975	Zm00001d035136 Zm00001d014030 Zm00001d053580 Zm00001d028471 Zm00001d003947 Zm00001d025240 Zm00001d034241 Zm00001d025258 Zm00001d003083 Zm00001d021070 Zm00001d022229 Zm00001d015497 Zm00001d015856 Zm00001d009212 Zm00001d024952 Zm00001d053684 Zm00001d020426 Zm00001d017258	zma:100502233 zma:100280767 zma:100284493 zma:541622 zma:100383579 zma:100383579 zma:100282134 zma:100280624 zma:100191657 zma:542607 zma:107305678 zma:103646899 zma:100282691 zma:100381818 zma:100281040 zma:100194338 zma:100285796 zma:100284286	100502233 100280767 100284493 541622 100383579 100383579 100282134 100280624 100191657 542607 107305678 103646899 100282691 100381818 100281040 100194338 100285796 100284286	GRMZM2G302259 dla1 GRMZM2G001696 GRMZM2G142863 GRMZM2G142863 GRMZM2G072744 GRMZM2G079538 GRMZM2G082581 GRMZM2G128121 GRMZM2G467338 GRMZM2G145595 aco2, GRMZM5G858454 cl5118_1 GRMZM2G121200
			Protein processing in endoplasmic reticulum	73	316	0.983908	0.999975	Zm00001d029304 Zm00001d015777 Zm00001d049155 Zm00001d021498 Zm00001d049099 Zm00001d034841 Zm00001d008236 Zm00001d000349 Zm00001d013111 Zm00001d003654 Zm00001d027514 Zm00001d028561 Zm00001d016060 Zm00001d027707 Zm00001d005544 Zm00001d039933 Zm00001d051619 Zm00001d030620 Zm00001d017809 Zm00001d010529 Zm00001d045665 Zm00001d004898 Zm00001d048687 Zm00001d025446 Zm00001d002388 Zm00001d042335 Zm00001d0…	zma:100283585 zma:100283886 zma:103652905 zma:103633177 zma:606409 zma:100273803 zma:100279808 zma:542482 zma:100382437 zma:606416 zma:100283983 zma:100191552 zma:100384252 zma:103639569 zma:100191694 zma:100280576 zma:100279874 zma:100282809 zma:100279899 zma:103635762 zma:100274222 zma:100217233 zma:103652717 zma:103641662 zma:100502479 zma:103652327 zma:100382771 zma:100279728 zma:103640123 zm…	100283585 100283886 103652905 103633177 606409 100273803 100279808 542482 100382437 606416 100283983 100191552 100384252 103639569 100191694 100280576 100279874 100282809 100279899 103635762 100274222 100217233 103652717 103641662 100502479 103652327 100382771 100279728 103640123 103640123 103633515 100192088 103633231 100273288 100384319 100217233 100276154 100384473 100193107 100193961 10363802…	GRMZM2G028218 GRMZM5G803365 GRMZM2G045987 GRMZM2G117612 PDIL1-1, GRMZM2G091481 GRMZM2G123901 pco088319 csy1, GRMZM5G809546, SECY GRMZM2G134917 pdi10, GRMZM2G113629, PDIL5-2 pco129593, GRMZM2G127101 pcl20249-1(711), GRMZM2G140582 GRMZM2G063060 GRMZM2G166897 GRMZM2G437100 TIDP2729, GRMZM2G035985 pco087010a, GRMZM2G044354 GRMZM2G020040 GRMZM5G802801 GRMZM2G028183 HSP70 GRMZM2G307262 GRMZM2G130889 GR…
			Ubiquitin mediated proteolysis	37	178	0.985969	0.999975	Zm00001d036679 Zm00001d013540 Zm00001d049230 Zm00001d018884 Zm00001d043613 Zm00001d014685 Zm00001d029561 Zm00001d038972 Zm00001d004898 Zm00001d007897 Zm00001d048473 Zm00001d000191 Zm00001d027427 Zm00001d052566 Zm00001d013361 Zm00001d014920 Zm00001d052138 Zm00001d009288 Zm00001d042677 Zm00001d008597 Zm00001d040036 Zm00001d052314 Zm00001d024855 Zm00001d028894 Zm00001d051091 Zm00001d009745 Zm00001d0…	zma:100384009 zma:103625986 zma:100280388 zma:100283297 zma:100280509 zma:103626410 zma:103636597 zma:103638448 zma:100217233 zma:100283297 zma:100282735 zma:103642438 zma:100283731 zma:100217233 zma:100192745 zma:100193107 zma:100286122 zma:100281541 zma:103648178 zma:100381699 zma:103651829 zma:100279472 zma:103641392 zma:103634565 zma:100284255 zma:103635427 zma:103635427 zma:103635779 zma:100…	100384009 103625986 100280388 100283297 100280509 103626410 103636597 103638448 100217233 100283297 100282735 103642438 100283731 100217233 100192745 100193107 100286122 100281541 103648178 100381699 103651829 100279472 103641392 103634565 100284255 103635427 103635427 103635779 100170243 103626521 103650429 100193750 100273625 100304346 100382860 100273625 103647788	GRMZM2G461948 GRMZM2G077307 GRMZM2G168886 GRMZM2G030805 GRMZM2G464572 GRMZM2G028183 GRMZM2G063931 GRMZM2G028183 GRMZM2G005365 GRMZM2G074282 GRMZM2G104920 GRMZM2G035999 GRMZM2G078218 GRMZM2G126956 pco090876 GRMZM2G166694 GRMZM5G824629 GRMZM2G356142, GRMZM2G430027 GRMZM2G356142, GRMZM2G430027 GRMZM2G328988 cl5847_1, GRMZM2G061624 GRMZM2G389155 gpm110 IDP475, GRMZM2G029307 GRMZM2G021299 GRMZM5G80084…
			Endocytosis	58	270	0.993248	0.999975	Zm00001d047020 Zm00001d003039 Zm00001d051676 Zm00001d040202 Zm00001d046599 Zm00001d032591 Zm00001d005484 Zm00001d012536 Zm00001d016049 Zm00001d043813 Zm00001d051187 Zm00001d012420 Zm00001d010538 Zm00001d030385 Zm00001d052308 Zm00001d005770 Zm00001d010529 Zm00001d048511 Zm00001d048687 Zm00001d012854 Zm00001d017881 Zm00001d045870 Zm00001d009205 Zm00001d021087 Zm00001d006607 Zm00001d011855 Zm00001d0…	zma:100283451 zma:103646223 zma:100272989 zma:100273036 zma:542116 zma:100383198 zma:103647321 zma:103651086 zma:100192764 zma:100273933 zma:103653236 zma:100501536 zma:103649028 zma:100284261 zma:103635525 zma:103647433 zma:103635762 zma:100384187 zma:103652717 zma:100286207 zma:100272989 zma:103638323 zma:100283490 zma:103632959 zma:100857099 zma:100381421 zma:103654268 zma:103630082 zma:100193…	100283451 103646223 100272989 100273036 542116 100383198 103647321 103651086 100192764 100273933 103653236 100501536 103649028 100284261 103635525 103647433 103635762 100384187 103652717 100286207 100272989 103638323 100283490 103632959 100857099 100381421 103654268 103630082 100193501 103638112 100382772 100279815 103635525 100285267 103637796 103632090 103635048 100280562 100191382 100283666 10…	GRMZM2G134045 ARPC2B, GRMZM2G052644 GRMZM2G126946 pco100749b, PCO100749_ov, pco100749(210) Sal1, GRMZM2G117935 GRMZM2G082529 GRMZM2G145944 IDP207, GRMZM2G109315 GRMZM2G020034 GRMZM2G172581 GRMZM2G062042 GRMZM2G159125 GRMZM5G802801 GRMZM2G092741, GRMZM2G700148 HSP70 cl8986_1, GRMZM2G112015 GRMZM2G126946 GRMZM2G047178 GRMZM2G075690 GRMZM2G059225 GRMZM2G438378 CHC2, GRMZM5G804382 GRMZM2G447455 GRMZM…
			Ribosome biogenesis in eukaryotes	21	128	0.997827	0.999975	Zm00001d041816 Zm00001d021557 Zm00001d029978 Zm00001d029046 Zm00001d012815 Zm00001d020853 Zm00001d022551 Zm00001d035913 Zm00001d029144 Zm00001d037267 Zm00001d024539 Zm00001d004502 Zm00001d028384 Zm00001d051885 Zm00001d009472 Zm00001d039091 Zm00001d039090 Zm00001d040311 Zm00001d051116 Zm00001d034125 Zm00001d034914	zma:100501283 zma:541824 zma:542628 zma:103634616 zma:103625708 zma:100191832 zma:103633590 zma:100279266 zma:100384739 zma:100193155 zma:100285001 zma:100193188 zma:100282785 zma:100282167 zma:103649964 zma:100193260 zma:100193260 zma:103649964 zma:100284497 zma:542637 zma:103625708	100501283 541824 542628 103634616 103625708 100191832 103633590 100279266 100384739 100193155 100285001 100193188 100282785 100282167 103649964 100193260 100193260 103649964 100284497 542637 103625708	GRMZM2G585025 pco084367(373), GRMZM2G161611 pco146174(472) GRMZM2G399320 GRMZM2G022258 GRMZM2G051626 GRMZM2G041527 si614021f04b, GRMZM2G475360 umc1472, GRMZM2G124576 GRMZM2G053767 GRMZM2G001551 GRMZM2G007399, GRMZM2G154799 pco102583(157) GRMZM2G354604 GRMZM2G354604 GRMZM2G133838 gpm388c, ACK2, GRMZM2G143602 GRMZM2G022258
			Nucleotide excision repair	19	125	0.999033	0.999975	Zm00001d039165 Zm00001d052113 Zm00001d043835 Zm00001d045665 Zm00001d010476 Zm00001d024423 Zm00001d008597 Zm00001d040203 Zm00001d050437 Zm00001d024509 Zm00001d016581 Zm00001d007500 Zm00001d028084 Zm00001d009745 Zm00001d043797 Zm00001d039263 Zm00001d026402 Zm00001d034399 Zm00001d053917	zma:103635427 zma:100383373 zma:103651343 zma:100274222 zma:100272776 zma:103642510 zma:100381699 zma:103649923 zma:103653487 zma:100280534 zma:103627197 zma:103648088 zma:103632168 zma:103635427 zma:103651319 zma:100280528 zma:103642101 zma:100193357 zma:100192883	103635427 100383373 103651343 100274222 100272776 103642510 100381699 103649923 103653487 100280534 103627197 103648088 103632168 103635427 103651319 100280528 103642101 100193357 100192883	GRMZM2G356142, GRMZM2G430027 pco075430a, GRMZM2G149286 GRMZM2G126956 GRMZM2G369260 GRMZM2G011631, GRMZM2G426847 GRMZM2G457381 GRMZM2G388915 GRMZM2G356142, GRMZM2G430027 GRMZM5G825437 GRMZM2G480171 pco093185f rad1
			N-Glycan biosynthesis	5	55	0.999277	0.999975	Zm00001d045555 Zm00001d042335 Zm00001d026257 Zm00001d039403 Zm00001d002388	zma:541686 zma:103652327 zma:103642037 zma:100282615 zma:100502479	541686 103652327 103642037 100282615 100502479	fdad1, dad1 GRMZM2G128914 cl19880_1, GRMZM2G051262 GRMZM2G130889
			Mismatch repair	11	94	0.999733	0.999975	Zm00001d052113 Zm00001d043835 Zm00001d001806 Zm00001d050929 Zm00001d050437 Zm00001d024509 Zm00001d007500 Zm00001d006300 Zm00001d006307 Zm00001d039263 Zm00001d034399	zma:100383373 zma:103651343 zma:103645753 zma:103653697 zma:103653487 zma:100280534 zma:103648088 zma:103647640 zma:103647640 zma:100280528 zma:100193357	100383373 103651343 103645753 103653697 103653487 100280534 103648088 103647640 103647640 100280528 100193357	GRMZM2G348956 GRMZM2G369260 GRMZM2G457381 GRMZM2G315902 GRMZM2G315902 GRMZM5G825437 pco093185f
			DNA replication	16	122	0.999817	0.999975	Zm00001d052113 Zm00001d015367 Zm00001d049190 Zm00001d024423 Zm00001d026402 Zm00001d038855 Zm00001d050437 Zm00001d012918 Zm00001d024509 Zm00001d016581 Zm00001d007500 Zm00001d043835 Zm00001d034399 Zm00001d039263 Zm00001d044540 Zm00001d018384	zma:100383373 zma:100275043 zma:100501077 zma:103642510 zma:103642101 zma:732817 zma:103653487 zma:732817 zma:100280534 zma:103627197 zma:103648088 zma:103651343 zma:100193357 zma:100280528 zma:100281587 zma:100304310	100383373 100275043 100501077 103642510 103642101 732817 103653487 732817 100280534 103627197 103648088 103651343 100193357 100280528 100281587 100304310	TIDP3662, GRMZM2G005998 GRMZM2G480171 FEN1, FEN-1, GRMZM2G121262, pco066214a FEN1, FEN-1, GRMZM2G121262, pco066214a GRMZM2G369260 GRMZM2G011631, GRMZM2G426847 GRMZM2G457381 pco093185f GRMZM5G825437
			Proteasome	11	99	0.999886	0.999975	Zm00001d002373 Zm00001d028801 Zm00001d017338 Zm00001d048403 Zm00001d037481 Zm00001d051211 Zm00001d018523 Zm00001d008284 Zm00001d015788 Zm00001d007215 Zm00001d026517	zma:103645964 zma:100279843 zma:100193683 zma:100282220 zma:100274559 zma:100193683 zma:103627906 zma:100217166 zma:100282100 zma:100501403 zma:100276453	103645964 100279843 100193683 100282220 100274559 100193683 103627906 100217166 100282100 100501403 100276453	GRMZM2G102000 GRMZM5G824831 GRMZM2G032505 GRMZM5G824831 GRMZM2G014116 GRMZM2G033626, GRMZM2G467059 GRMZM2G171604 GRMZM2G056569 GRMZM2G368908
			Homologous recombination	11	106	0.999967	0.999975	Zm00001d052113 Zm00001d024677 Zm00001d024423 Zm00001d033259 Zm00001d038113 Zm00001d042479 Zm00001d050437 Zm00001d024509 Zm00001d039263 Zm00001d026402 Zm00001d021015	zma:100383373 zma:103641317 zma:103642510 zma:100282426 zma:103630322 zma:100384162 zma:103653487 zma:100280534 zma:100280528 zma:103642101 zma:100383032	100383373 103641317 103642510 100282426 103630322 100384162 103653487 100280534 100280528 103642101 100383032	GRMZM2G393742 GRMZM2G154946, rmr1 GRMZM2G058954 GRMZM2G369260 GRMZM5G825437 GRMZM2G480171 GRMZM2G102181
			Ribosome	100	504	0.999975	0.999975	Zm00001d022463 GRMZM5G899892 Zm00001d009848 Zm00001d009579 Zm00001d038084 Zm00001d037489 Zm00001d012878 Zm00001d028240 GRMZM5G838396 Zm00001d032420 Zm00001d021445 Zm00001d011596 Zm00001d033665 Zm00001d032896 Zm00001d010614 Zm00001d015204 Zm00001d047581 GRMZM5G804776 Zm00001d006068 Zm00001d034724 Zm00001d031956 Zm00001d031957 Zm00001d050920 Zm00001d037539 GRMZM5G818111 Zm00001d025857 Zm00001d04413…	zma:100192778 zma:845215 zma:103635488 zma:100286074 zma:100283907 zma:100280771 zma:101027121 zma:100273366 zma:845237 zma:103643355 zma:100192835 zma:100286220 zma:100283244 zma:100281641 zma:100193262 zma:100193892 zma:100283777 zma:845213 zma:103636950 zma:100284921 zma:100272335 zma:100272335 zma:100191612 zma:100283221 zma:845215 zma:100192625 zma:100216899 zma:100194313 zma:542340 zma:5423…	100192778 845215 103635488 100286074 100283907 100280771 101027121 100273366 845237 103643355 100192835 100286220 100283244 100281641 100193262 100193892 100283777 845213 103636950 100284921 100272335 100272335 100191612 100283221 845215 100192625 100216899 100194313 542340 542337 100193696 100284301 103630659 845231 100382451 100283808 100282717 100283325 100280393 100274533 103633877 100282171 …	GRMZM2G063617 rpl2, ZemaCp109 pco154872, GRMZM2G113720 GRMZM2G005973 GRMZM2G166659 rps4, GRMZM2G125271 GRMZM2G164965 rps3, ZemaCp061 GRMZM2G025855 GRMZM2G140116 pco086004, GRMZM2G163988 umc1306, GRMZM2G153476 TIDP2957, GRMZM2G038833 pco064822, GRMZM5G899149 GRMZM2G109165 pco138567b, GRMZM5G862107 rpl14, ZemaCp059 GRMZM2G394122 GRMZM2G142097 pco112591, GRMZM2G008748 GRMZM2G042061 rpl2, ZemaCp109 G…

## Sheet: co_location_R
pathway_term	gene_number		Term	Sample number	Background number	P-value	Corrected P-value	UniGenes	KO	Entrez ID	Ensembl ID	Gene name
Ubiquinone and other terpenoid-quinone biosynthesis	6		Ubiquinone and other terpenoid-quinone biosynthesis	6	55	0.00377936	0.340143	Zm00001d010103 Zm00001d010101 Zm00001d019365 Zm00001d010098 Zm00001d010099 Zm00001d025819	zma:103635598 zma:103635598 zma:103633803 zma:103635598 zma:103635598 zma:100384459	103635598 103635598 103633803 103635598 103635598 100384459	GRMZM2G052418, GRMZM2G076169 GRMZM2G052418, GRMZM2G076169 GRMZM2G374213 GRMZM2G052418, GRMZM2G076169 GRMZM2G052418, GRMZM2G076169 GRMZM2G099729
Cyanoamino acid metabolism	5		Cyanoamino acid metabolism	5	57	0.0180459	0.587363	Zm00001d017352 Zm00001d037918 Zm00001d024891 Zm00001d042661 Zm00001d009738	zma:542573 zma:100279348 zma:103641409 zma:100191532 zma:103637040	542573 100279348 103641409 100191532 103637040	NIT1, GRMZM2G178517, ZmNIT1 GRMZM2G055699 GRMZM2G174699 GRMZM2G452630
One carbon pool by folate	3		One carbon pool by folate	3	21	0.0203718	0.587363	Zm00001d050448 Zm00001d042661 Zm00001d009738	zma:103653497 zma:100191532 zma:103637040	103653497 100191532 103637040	GRMZM2G452630
Oxidative phosphorylation	9		Oxidative phosphorylation	9	170	0.0331303	0.587363	GRMZM5G856027 Zm00001d021554 GRMZM5G834128 Zm00001d045148 Zm00001d014417 GRMZM5G854065 Zm00001d004821 Zm00001d044380 Zm00001d013156	zma:845187 zma:100191627 zma:845185 zma:103639746 zma:100191555 zma:845180 zma:100280656 zma:103652613 zma:100282522	845187 100191627 845185 103639746 100191555 845180 100280656 103652613 100282522	ndhH, ZemaCp092 csu657(atpd), GRMZM2G138220, atp3 ndhF, ndh5, ZemaCp083 GRMZM2G023760 pco107093, GRMZM2G173277 ndhB, ndh2, ZemaCp101 GRMZM2G028432, subunit_C
DNA replication	7		DNA replication	7	122	0.0402149	0.587363	Zm00001d030017 Zm00001d039358 Zm00001d002987 Zm00001d009392 Zm00001d034399 Zm00001d026089 Zm00001d018384	zma:100279971 zma:103646196 zma:103649263 zma:103635263 zma:100193357 zma:100282678 zma:100304310	100279971 103646196 103649263 103635263 100193357 100282678 100304310	GRMZM2G005536, GRMZM2G148626 pco093185f pco108913
Nitrogen metabolism	4		Nitrogen metabolism	4	50	0.0435025	0.587363	Zm00001d028260 Zm00001d017352 Zm00001d051804 Zm00001d022388	zma:542520 zma:542573 zma:542401 zma:542710	542520 542573 542401 542710	GLN6, GS1-1, GS122 NIT1, GRMZM2G178517, ZmNIT1 gln5, gs1-4 fgs1, GLSF, GRMZM2G036609, glutamate_synthase
Spliceosome	12		Spliceosome	12	269	0.0456838	0.587363	Zm00001d022243 Zm00001d032320 Zm00001d047191 Zm00001d039452 Zm00001d021864 Zm00001d045147 Zm00001d036331 Zm00001d032319 Zm00001d043861 Zm00001d014812 Zm00001d028898 Zm00001d023734	zma:100285628 zma:100281521 zma:103635858 zma:100274281 zma:103633324 zma:103638000 zma:103631172 zma:103643327 zma:103652539 zma:100283023 zma:103634567 zma:100284207	100285628 100281521 103635858 100274281 103633324 103638000 103631172 103643327 103652539 100283023 103634567 100284207	SCL25B, GRMZM5G867185, pco120172 GRMZM2G123459 GRMZM2G113139 cl9052_1, GRMZM2G143246 GRMZM2G046916 GRMZM2G000371, GRMZM2G023636 GRMZM2G121354, GRMZM2G121374 GRMZM5G895175 GRMZM2G152111 GRMZM2G121871 GRMZM2G009448
Glyoxylate and dicarboxylate metabolism	6		Glyoxylate and dicarboxylate metabolism	6	110	0.0666707	0.750046	Zm00001d028260 Zm00001d004564 Zm00001d042661 Zm00001d051804 Zm00001d022388 Zm00001d009738	zma:542520 zma:103646899 zma:100191532 zma:542401 zma:542710 zma:103637040	542520 103646899 100191532 542401 542710 103637040	GLN6, GS1-1, GS122 GRMZM2G467338 GRMZM2G452630 gln5, gs1-4 fgs1, GLSF, GRMZM2G036609, glutamate_synthase
Mismatch repair	5		Mismatch repair	5	94	0.0971384	0.809964	Zm00001d002987 Zm00001d026089 Zm00001d034399 Zm00001d030017 Zm00001d039358	zma:103649263 zma:100282678 zma:100193357 zma:100279971 zma:103646196	103649263 100282678 100193357 100279971 103646196	pco108913 pco093185f GRMZM2G005536, GRMZM2G148626
Folate biosynthesis	2		Folate biosynthesis	2	22	0.116904	0.809964	Zm00001d010744 Zm00001d050448	zma:100274493 zma:103653497	100274493 103653497	cl4945_1, GRMZM2G095955
Tyrosine metabolism	3		Tyrosine metabolism	3	46	0.11918	0.809964	Zm00001d010190 Zm00001d026109 Zm00001d019365	zma:100274472 zma:103641967 zma:103633803	100274472 103641967 103633803	pco075539 GRMZM2G374213
Steroid biosynthesis	3		Steroid biosynthesis	3	47	0.124607	0.809964	Zm00001d027548 Zm00001d004519 Zm00001d037139	zma:100192647 zma:100283692 zma:103636624	100192647 100283692 103636624	smt2, GRMZM2G075701 GRMZM2G149224 GRMZM2G035421
Nicotinate and nicotinamide metabolism	2		Nicotinate and nicotinamide metabolism	2	24	0.133413	0.809964	Zm00001d041077 Zm00001d052029	zma:103650090 zma:542168	103650090 542168	AY109712
Fatty acid metabolism	5		Fatty acid metabolism	5	108	0.146045	0.809964	Zm00001d017841 Zm00001d030591 Zm00001d017840 Zm00001d021059 Zm00001d045387	zma:100381639 zma:103644954 zma:100191328 zma:100284715 zma:103638097	100381639 103644954 100191328 100284715 103638097	GRMZM2G161792 GRMZM2G056252 GRMZM5G883417
Isoquinoline alkaloid biosynthesis	2		Isoquinoline alkaloid biosynthesis	2	26	0.150405	0.809964	Zm00001d010190 Zm00001d026109	zma:100274472 zma:103641967	100274472 103641967	pco075539
Alanine, aspartate and glutamate metabolism	4		Alanine, aspartate and glutamate metabolism	4	80	0.152312	0.809964	Zm00001d028260 Zm00001d048292 Zm00001d051804 Zm00001d010196	zma:542520 zma:100279870 zma:542401 zma:542435	542520 100279870 542401 542435	GLN6, GS1-1, GS122 IDP634, GRMZM2G169365 gln5, gs1-4 asn1, AS, AsnS1, GRMZM2G074589
Biosynthesis of unsaturated fatty acids	3		Biosynthesis of unsaturated fatty acids	3	52	0.152993	0.809964	Zm00001d017840 Zm00001d017841 Zm00001d021059	zma:100191328 zma:100381639 zma:100284715	100191328 100381639 100284715	GRMZM2G056252 GRMZM2G161792 GRMZM5G883417
Biotin metabolism	2		Biotin metabolism	2	28	0.167796	0.838979	Zm00001d030591 Zm00001d045886	zma:103644954 zma:100382888	103644954 100382888	si683027d02(142), GRMZM2G102156
Flavone and flavonol biosynthesis	1		Flavone and flavonol biosynthesis	1	7	0.18068	0.855852	Zm00001d017077	zma:100273383	100273383	GRMZM2G025832
Zeatin biosynthesis	2		Zeatin biosynthesis	2	31	0.194457	0.875059	Zm00001d036339 Zm00001d011618	zma:100174970 zma:103636191	100174970 103636191	IPT, GRMZM2G102915 GRMZM2G393014
			Ribosome	16	504	0.212388	0.885733	GRMZM5G877040 Zm00001d030691 Zm00001d037929 Zm00001d000121 Zm00001d045448 Zm00001d021020 Zm00001d021061 Zm00001d000120 Zm00001d022386 Zm00001d011992 Zm00001d004009 Zm00001d021018 Zm00001d028622 Zm00001d018383 Zm00001d033665 GRMZM5G861791	zma:1466374 zma:100191681 zma:100193240 zma:100383683 zma:100194044 zma:100282508 zma:100282418 zma:100216896 zma:103643027 zma:100282254 zma:100281632 zma:100193699 zma:100192516 zma:542444 zma:100283244 zma:845214	1466374 100191681 100193240 100383683 100194044 100282508 100282418 100216896 103643027 100282254 100281632 100193699 100192516 542444 100283244 845214	rps12, ZemaCp001 GRMZM2G072729 GRMZM2G078985 csu616, GRMZM2G092296 GRMZM2G115901 magi99589, GRMZM5G870752 cl25046_1a, GRMZM2G069762 GRMZM2G145280 pco139614b rpl39, GRMZM2G100467, ec2e umc1306, GRMZM2G153476 rpl16, ZemaCp060
			Nucleotide excision repair	5	125	0.216512	0.885733	Zm00001d002987 Zm00001d026089 Zm00001d034399 Zm00001d030017 Zm00001d039358	zma:103649263 zma:100282678 zma:100193357 zma:100279971 zma:103646196	103649263 100282678 100193357 100279971 103646196	pco108913 pco093185f GRMZM2G005536, GRMZM2G148626
			Fatty acid biosynthesis	3	68	0.254025	0.926464	Zm00001d030591 Zm00001d021059 Zm00001d045387	zma:103644954 zma:100284715 zma:103638097	103644954 100284715 103638097	GRMZM5G883417
			Photosynthesis	4	101	0.258742	0.926464	Zm00001d013146 Zm00001d034099 Zm00001d018779 Zm00001d044380	zma:103625835 zma:103640685 zma:100273117 zma:103652613	103625835 103640685 100273117 103652613	GRMZM2G085646 GRMZM2G047954
			Homologous recombination	4	106	0.286063	0.926464	Zm00001d002987 Zm00001d030017 Zm00001d039358 Zm00001d021015	zma:103649263 zma:100279971 zma:103646196 zma:100383032	103649263 100279971 103646196 100383032	GRMZM2G005536, GRMZM2G148626 GRMZM2G102181
			Thiamine metabolism	1	13	0.294473	0.926464	Zm00001d037916	zma:100280851	100280851	tpk1, GRMZM5G864815
			Brassinosteroid biosynthesis	1	13	0.294473	0.926464	Zm00001d039453	zma:100384722	100384722	GRMZM2G143235
			Vitamin B6 metabolism	1	14	0.311843	0.926464	Zm00001d030533	zma:100381809	100381809	GRMZM2G061988
			Aminoacyl-tRNA biosynthesis	4	111	0.313775	0.926464	Zm00001d035789 Zm00001d052032 Zm00001d024493 Zm00001d023741	zma:103635898 zma:103654174 zma:103641233 zma:103640907	103635898 103654174 103641233 103640907	GRMZM2G106974, GRMZM2G438602 GRMZM2G082271
			Phagosome	5	149	0.329036	0.926464	Zm00001d009737 Zm00001d004821 Zm00001d032238 Zm00001d042662 Zm00001d035610	zma:103642971 zma:100280656 zma:103643294 zma:103650943 zma:100280873	103642971 100280656 103643294 103650943 100280873	GRMZM2G028432, subunit_C GRMZM2G092595
			Linoleic acid metabolism	1	16	0.345313	0.926464	Zm00001d037139	zma:103636624	103636624	GRMZM2G035421
			Phenylalanine metabolism	2	48	0.349271	0.926464	Zm00001d010190 Zm00001d019365	zma:100274472 zma:103633803	100274472 103633803	pco075539 GRMZM2G374213
			Arginine biosynthesis	2	49	0.358216	0.926464	Zm00001d028260 Zm00001d051804	zma:542520 zma:542401	542520 542401	GLN6, GS1-1, GS122 gln5, gs1-4
			Arachidonic acid metabolism	1	17	0.361435	0.926464	Zm00001d037139	zma:103636624	103636624	GRMZM2G035421
			Glycerolipid metabolism	3	85	0.368407	0.926464	Zm00001d036982 Zm00001d007638 Zm00001d037139	zma:103629820 zma:732844 zma:103636624	103629820 732844 103636624	DGAT1-2, GRMZM2G169089 pls1, Agpat4, GRMZM2G037104 GRMZM2G035421
			Sphingolipid metabolism	2	51	0.375967	0.926464	Zm00001d052258 Zm00001d004560	zma:100283399 zma:100281549	100283399 100281549	GRMZM2G144985
			Inositol phosphate metabolism	3	87	0.381815	0.926464	Zm00001d013393 Zm00001d032238 Zm00001d042662	zma:103627995 zma:103643294 zma:103650943	103627995 103643294 103650943	GRMZM2G092595
			Regulation of autophagy	2	53	0.393514	0.926464	Zm00001d011984 Zm00001d010743	zma:103636340 zma:103635843	103636340 103635843	GRMZM2G027857 GRMZM2G096115
			Metabolic pathways	68	2609	0.404819	0.926464	Zm00001d021554 Zm00001d030017 Zm00001d011618 Zm00001d010103 Zm00001d004821 Zm00001d010101 Zm00001d038897 GRMZM5G854065 Zm00001d013393 Zm00001d028349 Zm00001d028348 Zm00001d028347 Zm00001d036339 Zm00001d013156 Zm00001d045503 Zm00001d028260 Zm00001d004564 GRMZM5G834128 Zm00001d045387 Zm00001d045886 Zm00001d017077 Zm00001d024891 Zm00001d030967 Zm00001d030591 Zm00001d004481 Zm00001d036820 Zm00001d036…	zma:100191627 zma:100279971 zma:103636191 zma:103635598 zma:100280656 zma:103635598 zma:100282854 zma:845180 zma:103627995 zma:100280077 zma:100192603 zma:103633271 zma:100174970 zma:100282522 zma:100193348 zma:542520 zma:103646899 zma:845185 zma:103638097 zma:100382888 zma:100273383 zma:103641409 zma:100279195 zma:103644954 zma:100280500 zma:542387 zma:542387 zma:100284145 zma:103637040 zma:5427…	100191627 100279971 103636191 103635598 100280656 103635598 100282854 845180 103627995 100280077 100192603 103633271 100174970 100282522 100193348 542520 103646899 845185 103638097 100382888 100273383 103641409 100279195 103644954 100280500 542387 542387 100284145 103637040 542727 100191532 103640685 542401 100279513 103639746 100281549 100191555 103653497 103629820 100384722 103650090 100283399 …	csu657(atpd), GRMZM2G138220, atp3 GRMZM2G005536, GRMZM2G148626 GRMZM2G393014 GRMZM2G052418, GRMZM2G076169 GRMZM2G028432, subunit_C GRMZM2G052418, GRMZM2G076169 GRMZM2G109743 ndhB, ndh2, ZemaCp101 GRMZM2G116823 IPT, GRMZM2G102915 GLN6, GS1-1, GS122 GRMZM2G467338 ndhF, ndh5, ZemaCp083 si683027d02(142), GRMZM2G102156 GRMZM2G025832 GRMZM2G174699 GRMZM2G130034 pgl1, GRMZM2G418644, PG14, PG2, PG3, PG6 …
			Phenylpropanoid biosynthesis	7	242	0.414072	0.926464	Zm00001d015513 Zm00001d024891 Zm00001d028349 Zm00001d028348 Zm00001d028347 Zm00001d045101 Zm00001d037918	zma:100285564 zma:103641409 zma:100280077 zma:100192603 zma:103633271 zma:100382657 zma:100279348	100285564 103641409 100280077 100192603 103633271 100382657 100279348	GRMZM2G057328 GRMZM2G174699 GRMZM2G116823 GRMZM2G055699
			Tropane, piperidine and pyridine alkaloid biosynthesis	1	21	0.422056	0.926464	Zm00001d010190	zma:100274472	100274472	pco075539
			RNA transport	7	249	0.442206	0.928583	Zm00001d047191 Zm00001d014327 Zm00001d029511 Zm00001d034299 Zm00001d043861 Zm00001d041988 Zm00001d041973	zma:103635858 zma:100192551 zma:103636314 zma:103634826 zma:103652539 zma:100283973 zma:100283214	103635858 100192551 103636314 103634826 103652539 100283973 100283214	GRMZM2G113139 GRMZM2G052148
			Stilbenoid, diarylheptanoid and gingerol biosynthesis	1	23	0.450179	0.928583	Zm00001d021562	zma:100272924	100272924	GRMZM2G175812
			Phosphatidylinositol signaling system	3	99	0.460503	0.928583	Zm00001d013393 Zm00001d032238 Zm00001d042662	zma:103627995 zma:103643294 zma:103650943	103627995 103643294 103650943	GRMZM2G092595
			Glutathione metabolism	4	139	0.468996	0.928583	Zm00001d027540 Zm00001d041977 Zm00001d027542 Zm00001d022383	zma:541830 zma:103631005 zma:541828 zma:103637520	541830 103631005 541828 103637520	gst12, GRMZM2G096269 gst10, GRMZM2G096153
			mRNA surveillance pathway	5	179	0.474609	0.928583	Zm00001d047191 Zm00001d036977 Zm00001d049412 Zm00001d020677 Zm00001d044377	zma:103635858 zma:100382126 zma:103643458 zma:103643458 zma:103641974	103635858 100382126 103643458 103643458 103641974	GRMZM2G113139 GRMZM2G109009 GRMZM2G148323 GRMZM2G148323
			Plant hormone signal transduction	9	355	0.541257	0.952615	Zm00001d051911 Zm00001d034161 Zm00001d051802 Zm00001d024160 Zm00001d021062 Zm00001d013142 Zm00001d002982 Zm00001d004277 Zm00001d050723	zma:100273242 zma:100283283 zma:100381449 zma:100192658 zma:100284388 zma:103625834 zma:541629 zma:100284433 zma:100216941	100273242 100283283 100381449 100192658 100284388 103625834 541629 100284433 100216941	AUX27, GRMZM2G142768, GRMZM2G142768_T01 GRMZM2G138861 bZIP107, GRMZM2G094352, GRMZM2G094352_T01 GRMZM2G430052 GRMZM2G130675 abph1, GRMZM2G035688, RR3, ZmRR3 ZIM4, GRMZM2G036351_T01 GRMZM2G130018
			Protein processing in endoplasmic reticulum	8	316	0.545896	0.952615	Zm00001d035610 Zm00001d028894 Zm00001d022378 Zm00001d012361 Zm00001d047550 Zm00001d047553 Zm00001d050725 Zm00001d013148	zma:100280873 zma:103634565 zma:103633515 zma:100283523 zma:100382437 zma:542293 zma:606414 zma:103625837	100280873 103634565 103633515 100283523 100382437 542293 606414 103625837	GRMZM5G824629 GRMZM2G152963 pco111461, GRMZM5G897988 GRMZM2G134917 hsp18a, GRMZM2G404249, HSP18 pdi7, GRMZM2G159369, PDIL2-2
			Photosynthesis - antenna proteins	1	31	0.549665	0.952615	Zm00001d040012	zma:542321	542321	lhcb6, CP24, GRMZM2G092427, Lhcb6-1
			Cutin, suberine and wax biosynthesis	1	31	0.549665	0.952615	Zm00001d017528	zma:100192011	100192011	GRMZM2G020500
			Phenylalanine, tyrosine and tryptophan biosynthesis	2	73	0.554015	0.952615	Zm00001d010190 Zm00001d045450	zma:100274472 zma:542727	100274472 542727	pco075539 eps1, GRMZM5G877500, epsp-s
			Protein export	2	76	0.575378	0.952615	Zm00001d034823 Zm00001d035610	zma:103625721 zma:100280873	103625721 100280873	GRMZM2G136854
			Pentose and glucuronate interconversions	2	76	0.575378	0.952615	Zm00001d036820 Zm00001d036823	zma:542387 zma:542387	542387 542387	pgl1, GRMZM2G418644, PG14, PG2, PG3, PG6 pgl1, GRMZM2G418644, PG14, PG2, PG3, PG6
			ABC transporters	1	34	0.582154	0.952615	Zm00001d025043	zma:100381832	100381832	NA
			Pantothenate and CoA biosynthesis	1	34	0.582154	0.952615	Zm00001d039450	zma:100284145	100284145	NA
			Ether lipid metabolism	1	37	0.612304	0.979218	Zm00001d037139	zma:103636624	103636624	GRMZM2G035421
			Pyrimidine metabolism	4	176	0.649848	0.979218	Zm00001d004481 Zm00001d030017 Zm00001d052029 Zm00001d050448	zma:100280500 zma:100279971 zma:542168 zma:103653497	100280500 100279971 542168 103653497	GRMZM2G005536, GRMZM2G148626 AY109712
			Flavonoid biosynthesis	1	44	0.674484	0.979218	Zm00001d017077	zma:100273383	100273383	GRMZM2G025832
			Fatty acid elongation	1	45	0.682515	0.979218	Zm00001d016438	zma:100285225	100285225	GRMZM2G569948
			Citrate cycle (TCA cycle)	2	98	0.709149	0.979218	Zm00001d004564 Zm00001d045148	zma:103646899 zma:103639746	103646899 103639746	GRMZM2G467338 GRMZM2G023760
			Biosynthesis of amino acids	8	371	0.718794	0.979218	Zm00001d028260 Zm00001d010190 Zm00001d042661 Zm00001d004564 Zm00001d045450 Zm00001d045451 Zm00001d051804 Zm00001d009738	zma:542520 zma:100274472 zma:100191532 zma:103646899 zma:542727 zma:100279513 zma:542401 zma:103637040	542520 100274472 100191532 103646899 542727 100279513 542401 103637040	GLN6, GS1-1, GS122 pco075539 GRMZM2G452630 GRMZM2G467338 eps1, GRMZM5G877500, epsp-s GRMZM2G033208 gln5, gs1-4
			Base excision repair	1	50	0.719798	0.979218	Zm00001d030017	zma:100279971	100279971	GRMZM2G005536, GRMZM2G148626
			Tryptophan metabolism	1	55	0.752714	0.979218	Zm00001d017352	zma:542573	542573	NIT1, GRMZM2G178517, ZmNIT1
			alpha-Linolenic acid metabolism	1	55	0.752714	0.979218	Zm00001d037139	zma:103636624	103636624	GRMZM2G035421
			Starch and sucrose metabolism	5	251	0.758506	0.979218	Zm00001d037918 Zm00001d036820 Zm00001d024891 Zm00001d036823 Zm00001d029516	zma:100279348 zma:542387 zma:103641409 zma:542387 zma:100281481	100279348 542387 103641409 542387 100281481	GRMZM2G055699 pgl1, GRMZM2G418644, PG14, PG2, PG3, PG6 GRMZM2G174699 pgl1, GRMZM2G418644, PG14, PG2, PG3, PG6
			Ascorbate and aldarate metabolism	1	57	0.764774	0.979218	Zm00001d022383	zma:103637520	103637520	NA
			Glycine, serine and threonine metabolism	2	111	0.770347	0.979218	Zm00001d042661 Zm00001d009738	zma:100191532 zma:103637040	100191532 103637040	GRMZM2G452630
			Plant-pathogen interaction	4	209	0.772492	0.979218	Zm00001d033655 Zm00001d023923 Zm00001d043609 Zm00001d030016	zma:100279294 zma:103640983 zma:542356 zma:606485	100279294 103640983 542356 606485	GRMZM2G044557 mek1, GRMZM2G167856 MRPR1
			Basal transcription factors	1	61	0.787162	0.979218	Zm00001d034314	zma:103644121	103644121	GRMZM2G454830
			Biosynthesis of secondary metabolites	33	1481	0.794513	0.979218	Zm00001d011618 Zm00001d042661 Zm00001d010103 Zm00001d010101 Zm00001d016438 Zm00001d028349 Zm00001d028348 Zm00001d028347 Zm00001d009738 Zm00001d004564 Zm00001d015513 Zm00001d017077 Zm00001d024891 Zm00001d045450 Zm00001d021562 Zm00001d034824 Zm00001d045148 Zm00001d039453 Zm00001d045451 Zm00001d027548 Zm00001d010098 Zm00001d010099 Zm00001d013140 Zm00001d036339 Zm00001d045101 Zm00001d037918 Zm00001d0…	zma:103636191 zma:100191532 zma:103635598 zma:103635598 zma:100285225 zma:100280077 zma:100192603 zma:103633271 zma:103637040 zma:103646899 zma:100285564 zma:100273383 zma:103641409 zma:542727 zma:100272924 zma:100272618 zma:103639746 zma:100384722 zma:100279513 zma:100192647 zma:103635598 zma:103635598 zma:103644011 zma:100174970 zma:100382657 zma:100279348 zma:100274472 zma:542435 zma:103636624…	103636191 100191532 103635598 103635598 100285225 100280077 100192603 103633271 103637040 103646899 100285564 100273383 103641409 542727 100272924 100272618 103639746 100384722 100279513 100192647 103635598 103635598 103644011 100174970 100382657 100279348 100274472 542435 103636624 541874 103641967 732844 100384459	GRMZM2G393014 GRMZM2G452630 GRMZM2G052418, GRMZM2G076169 GRMZM2G052418, GRMZM2G076169 GRMZM2G569948 GRMZM2G116823 GRMZM2G467338 GRMZM2G057328 GRMZM2G025832 GRMZM2G174699 eps1, GRMZM5G877500, epsp-s GRMZM2G175812 GRMZM5G898915 GRMZM2G023760 GRMZM2G143235 GRMZM2G033208 smt2, GRMZM2G075701 GRMZM2G052418, GRMZM2G076169 GRMZM2G052418, GRMZM2G076169 GRMZM2G100084 IPT, GRMZM2G102915 GRMZM2G055699 pco075…
			Porphyrin and chlorophyll metabolism	1	64	0.802547	0.979218	Zm00001d011876	zma:542164	542164	elm1, GRMZM5G861678, Hy2
			RNA degradation	3	176	0.820409	0.979218	Zm00001d052031 Zm00001d034013 Zm00001d018378	zma:100216888 zma:103649879 zma:100216888	100216888 103649879 100216888	cl704_1a cl704_1a
			Purine metabolism	4	227	0.823665	0.979218	Zm00001d023922 Zm00001d013140 Zm00001d030017 Zm00001d030967	zma:100284281 zma:103644011 zma:100279971 zma:100279195	100284281 103644011 100279971 100279195	cl30467_1, GRMZM2G084463 GRMZM2G100084 GRMZM2G005536, GRMZM2G148626 GRMZM2G130034
			Circadian rhythm - plant	1	69	0.825762	0.979218	Zm00001d034105	zma:541825	541825	GRMZM5G845755
			Ubiquitin mediated proteolysis	3	178	0.826151	0.979218	Zm00001d043613 Zm00001d028894 Zm00001d009007	zma:100280509 zma:103634565 zma:100502472	100280509 103634565 100502472	GRMZM2G077307 GRMZM5G824629 GRMZM2G123519
			Ribosome biogenesis in eukaryotes	2	128	0.833264	0.979218	Zm00001d034105 Zm00001d052952	zma:541825 zma:103643026	541825 103643026	GRMZM5G845755
			Glycerophospholipid metabolism	2	130	0.839545	0.979218	Zm00001d007638 Zm00001d037139	zma:732844 zma:103636624	732844 103636624	pls1, Agpat4, GRMZM2G037104 GRMZM2G035421
			Arginine and proline metabolism	1	78	0.860904	0.979218	Zm00001d045503	zma:100193348	100193348	NA
			Galactose metabolism	1	80	0.867697	0.979218	Zm00001d034824	zma:100272618	100272618	GRMZM5G898915
			Pentose phosphate pathway	1	83	0.877272	0.979218	Zm00001d045451	zma:100279513	100279513	GRMZM2G033208
			2-Oxocarboxylic acid metabolism	1	86	0.886156	0.979218	Zm00001d004564	zma:103646899	103646899	GRMZM2G467338
			Endocytosis	4	270	0.908413	0.979218	Zm00001d007763 Zm00001d050122 Zm00001d006602 Zm00001d022251	zma:100282517 zma:100284688 zma:100279757 zma:100193344	100282517 100284688 100279757 100193344	pco128668, GRMZM2G149847 GRMZM2G129354 TIDP3283, GRMZM2G335738
			Proteasome	1	99	0.917809	0.979218	Zm00001d016439	zma:100273032	100273032	GRMZM2G137528
			Carbon fixation in photosynthetic organisms	1	113	0.942148	0.979218	Zm00001d045451	zma:100279513	100279513	GRMZM2G033208
			Amino sugar and nucleotide sugar metabolism	2	186	0.947838	0.979218	Zm00001d039361 Zm00001d029516	zma:103649574 zma:100281481	103649574 100281481	NA
			Peroxisome	1	122	0.953847	0.979218	Zm00001d038897	zma:100282854	100282854	GRMZM2G109743
			Carbon metabolism	5	372	0.957305	0.979218	Zm00001d004564 Zm00001d045451 Zm00001d045148 Zm00001d042661 Zm00001d009738	zma:103646899 zma:100279513 zma:103639746 zma:100191532 zma:103637040	103646899 100279513 103639746 100191532 103637040	GRMZM2G467338 GRMZM2G033208 GRMZM2G023760 GRMZM2G452630
			Pyruvate metabolism	1	126	0.958258	0.979218	Zm00001d030240	zma:100216606	100216606	AY110374, GRMZM2G120300
			Cysteine and methionine metabolism	1	137	0.968338	0.979218	Zm00001d031019	zma:541874	541874	HMT-2, GRMZM2G117240
			Glycolysis / Gluconeogenesis	1	193	0.992272	0.992272	Zm00001d034824	zma:100272618	100272618	GRMZM5G898915

## Sheet: co_location_L
pathway_term	gene_number		Term	Sample number	Background number	P-value	Corrected P-value	UniGenes	KO	Entrez ID	Ensembl ID	Gene name
Cysteine and methionine metabolism	17		Cysteine and methionine metabolism	17	137	0.00417504	0.47178	Zm00001d008379 Zm00001d020543 Zm00001d032695 Zm00001d020544 Zm00001d045347 Zm00001d039487 Zm00001d046112 Zm00001d052136 Zm00001d031019 Zm00001d032925 Zm00001d045344 Zm00001d045350 Zm00001d045340 Zm00001d045341 Zm00001d033480 Zm00001d007917 Zm00001d048060	zma:100280321 zma:103632784 zma:542598 zma:100282888 zma:103638081 zma:107521951 zma:732743 zma:542137 zma:541874 zma:100285340 zma:103638081 zma:103638081 zma:103638081 zma:103638079 zma:100286153 zma:103648899 zma:541873	100280321 103632784 542598 100282888 103638081 107521951 732743 542137 541874 100285340 103638081 103638081 103638081 103638079 100286153 103648899 541873	cys1 GRMZM2G060369 mdh5, GRMZM2G415359, mdh4 IDP754, GRMZM2G461159 GRMZM2G003289 spesyn, GRMZM2G047867, spds2 acco20, ACO20, GRMZM2G126732, ZmACO20 HMT-2, GRMZM2G117240 GRMZM2G003289 GRMZM2G003289 GRMZM2G003289 GRMZM2G104237 TIDP3524, GRMZM2G165747 GRMZM2G111909 hmt1, HMT-1
SNARE interactions in vesicular transport	8		SNARE interactions in vesicular transport	8	51	0.0138252	0.538124	Zm00001d050146 Zm00001d053607 Zm00001d013114 Zm00001d013115 Zm00001d034406 Zm00001d021913 Zm00001d005751 Zm00001d026122	zma:100217094 zma:103654811 zma:100284409 zma:100284409 zma:103644161 zma:100276126 zma:100282420 zma:100193453	100217094 103654811 100284409 100284409 103644161 100276126 100282420 100193453	GRMZM2G414540 GRMZM2G414540 GRMZM2G120596 pco146901, GRMZM2G063420 GRMZM2G059106 pco135291a, GRMZM2G003124
Sulfur relay system	4		Sulfur relay system	4	14	0.0142865	0.538124	Zm00001d053887 Zm00001d002755 Zm00001d051608 Zm00001d016866	zma:100284923 zma:100280109 zma:100191959 zma:100272516	100284923 100280109 100191959 100272516	umc2551 GRMZM2G347027 MOCS3-2, UBA4-2 GRMZM2G135816
Arachidonic acid metabolism	4		Arachidonic acid metabolism	4	17	0.0245734	0.640186	Zm00001d037079 Zm00001d047448 Zm00001d037139 Zm00001d013014	zma:100272844 zma:100283257 zma:103636624 zma:100382466	100272844 100283257 103636624 100382466	GRMZM2G012479 pco114914, GRMZM2G329144 GRMZM2G035421 AY110479
Sulfur metabolism	7		Sulfur metabolism	7	48	0.0283268	0.640186	Zm00001d008379 Zm00001d045341 Zm00001d045347 Zm00001d045344 Zm00001d045350 Zm00001d045340 Zm00001d004513	zma:100280321 zma:103638079 zma:103638081 zma:103638081 zma:103638081 zma:103638081 zma:100281036	100280321 103638079 103638081 103638081 103638081 103638081 100281036	cys1 GRMZM2G104237 GRMZM2G003289 GRMZM2G003289 GRMZM2G003289 GRMZM2G003289 GRMZM2G158147
Folate biosynthesis	4		Folate biosynthesis	4	22	0.0496453	0.934987	Zm00001d053887 Zm00001d021338 Zm00001d016866 Zm00001d050448	zma:100284923 zma:100280079 zma:100272516 zma:103653497	100284923 100280079 100272516 103653497	umc2551 GRMZM2G095806 GRMZM2G135816
Steroid biosynthesis	6		Steroid biosynthesis	6	47	0.0659934	0.963907	Zm00001d004197 Zm00001d037139 Zm00001d053889 Zm00001d013014 Zm00001d040979 Zm00001d004519	zma:103648785 zma:103636624 zma:103654926 zma:100382466 zma:100217119 zma:100283692	103648785 103636624 103654926 100382466 100217119 100283692	GRMZM2G057136 GRMZM2G035421 GRMZM2G065494 AY110479 GRMZM2G062531 GRMZM2G149224
Histidine metabolism	4		Histidine metabolism	4	28	0.0928765	0.963907	Zm00001d034412 Zm00001d050495 Zm00001d045706 Zm00001d047084	zma:103645686 zma:103646581 zma:732806 zma:103640234	103645686 103646581 732806 103640234	GRMZM2G017299 rf2, GRMZM2G058675
beta-Alanine metabolism	6		beta-Alanine metabolism	6	55	0.111972	0.963907	Zm00001d030059 Zm00001d045706 Zm00001d003522 Zm00001d046112 Zm00001d050495 Zm00001d021506	zma:100283686 zma:732806 zma:100273302 zma:732743 zma:103646581 zma:100283449	100283686 732806 100273302 732743 103646581 100283449	rf2, GRMZM2G058675 GRMZM2G355906 spesyn, GRMZM2G047867, spds2 bas1, GRMZM2G077673, upb1
Tryptophan metabolism	6		Tryptophan metabolism	6	55	0.111972	0.963907	Zm00001d045706 Zm00001d039323 Zm00001d013098 Zm00001d044069 Zm00001d050495 Zm00001d041402	zma:732806 zma:103649553 zma:542229 zma:100280444 zma:103646581 zma:100283420	732806 103649553 542229 100280444 103646581 100283420	rf2, GRMZM2G058675 cl1856_1, AO2, GRMZM2G124175, GRMZM5G899851, zmAO-2 spi1 GRMZM2G328780
Zeatin biosynthesis	4		Zeatin biosynthesis	4	31	0.119433	0.963907	Zm00001d036339 Zm00001d003869 Zm00001d040810 Zm00001d006529	zma:100174970 zma:103646537 zma:103651988 zma:542056	100174970 103646537 103651988 542056	IPT, GRMZM2G102915 GRMZM2G084462, IPT2 IPT7 cko3, GRMZM2G167220
Glycosphingolipid biosynthesis - globo series	2		Glycosphingolipid biosynthesis - globo series	2	10	0.135373	0.963907	Zm00001d025912 Zm00001d019552	zma:100283564 zma:100191564	100283564 100191564	GRMZM2G399048 GRMZM2G146463
RNA transport	19		RNA transport	19	249	0.141164	0.963907	Zm00001d036151 Zm00001d002839 Zm00001d028794 Zm00001d022198 Zm00001d044054 Zm00001d029048 Zm00001d014065 Zm00001d029511 Zm00001d021788 Zm00001d031680 Zm00001d012314 Zm00001d043861 Zm00001d018450 Zm00001d025193 Zm00001d053701 Zm00001d041988 Zm00001d020895 Zm00001d040295 Zm00001d024955	zma:100273317 zma:103648481 zma:103633283 zma:100502129 zma:100282843 zma:100282096 zma:541708 zma:103636314 zma:100502553 zma:103645182 zma:100382780 zma:103652539 zma:100272405 zma:100272851 zma:103640102 zma:100283973 zma:103639423 zma:103636269 zma:103652231	100273317 103648481 103633283 100502129 100282843 100282096 541708 103636314 100502553 103645182 100382780 103652539 100272405 100272851 103640102 100283973 103639423 103636269 103652231	IDP121, GRMZM2G476555 GRMZM2G153162 GRMZM2G427408 TIDP3014 GRMZM2G056462 eif7, eIFiso-4E IDP257, GRMZM2G061043, GRMZM2G162329 GRMZM5G806257, pco145392 GRMZM2G028945 SR45_2, GRMZM2G133926
Pentose and glucuronate interconversions	7		Pentose and glucuronate interconversions	7	76	0.163193	0.963907	Zm00001d028351 Zm00001d022460 Zm00001d022567 Zm00001d002124 Zm00001d045706 Zm00001d032806 Zm00001d022104	zma:103640441 zma:103633554 zma:100284955 zma:103645866 zma:732806 zma:100281581 zma:103633411	103640441 103633554 100284955 103645866 732806 100281581 103633411	GRMZM2G025182 GRMZM2G112984 GRMZM2G352359 rf2, GRMZM2G058675 GRMZM2G472060 GRMZM2G037411
Arginine and proline metabolism	7		Arginine and proline metabolism	7	78	0.17756	0.963907	Zm00001d020543 Zm00001d020544 Zm00001d045706 Zm00001d046112 Zm00001d013053 Zm00001d050495 Zm00001d034124	zma:103632784 zma:100282888 zma:732806 zma:732743 zma:100857083 zma:103646581 zma:100283657	103632784 100282888 732806 732743 100857083 103646581 100283657	GRMZM2G060369 IDP754, GRMZM2G461159 rf2, GRMZM2G058675 spesyn, GRMZM2G047867, spds2 P4H6 cl32377_1(260), GRMZM2G348578
Peroxisome	10		Peroxisome	10	122	0.179652	0.963907	Zm00001d001208 Zm00001d032773 Zm00001d009134 Zm00001d010908 Zm00001d023765 Zm00001d034358 Zm00001d021772 Zm00001d012317 Zm00001d031327 Zm00001d023538	zma:542764 zma:103643490 zma:103635090 zma:100383425 zma:103635236 zma:100283272 zma:103633296 zma:100285661 zma:100191477 zma:103640823	542764 103643490 103635090 100383425 103635236 100283272 103633296 100285661 100191477 103640823	sod3, GRMZM2G059991, SODA.4 GRMZM2G428628 GRMZM2G013450 GRMZM2G364369 pco138129, GRMZM2G395354 GRMZM2G080775 GRMZM2G118286
Ether lipid metabolism	4		Ether lipid metabolism	4	37	0.180705	0.963907	Zm00001d034875 Zm00001d013014 Zm00001d037139 Zm00001d040629	zma:103644330 zma:100382466 zma:103636624 zma:100193648	103644330 100382466 103636624 100193648	GRMZM2G422670 AY110479 GRMZM2G035421 cl15598_1c, GRMZM2G096010, JD1
Sphingolipid metabolism	5		Sphingolipid metabolism	5	51	0.186056	0.963907	Zm00001d016993 Zm00001d012318 Zm00001d021787 Zm00001d019552 Zm00001d003934	zma:100193560 zma:100383275 zma:100284895 zma:100191564 zma:103648713	100193560 100383275 100284895 100191564 103648713	GRMZM2G444643 GRMZM2G057475 GRMZM2G146463 GRMZM2G055854
Mismatch repair	8		Mismatch repair	8	94	0.188698	0.963907	Zm00001d022028 Zm00001d028000 Zm00001d012722 Zm00001d050611 Zm00001d034399 Zm00001d015995 Zm00001d026089 Zm00001d014584	zma:100279876 zma:103639334 zma:100194011 zma:100279971 zma:100193357 zma:103647640 zma:100282678 zma:100285903	100279876 103639334 100194011 100279971 100193357 103647640 100282678 100285903	mus1, GRMZM2G056075 GRMZM2G180539 GRMZM2G005536, GRMZM2G148626 pco093185f GRMZM2G315902 pco108913 GRMZM2G061485
Glycerolipid metabolism	7		Glycerolipid metabolism	7	85	0.231664	0.963907	Zm00001d019552 Zm00001d045706 Zm00001d049024 Zm00001d037139 Zm00001d013014 Zm00001d050495 Zm00001d004642	zma:100191564 zma:732806 zma:100283803 zma:103636624 zma:100382466 zma:103646581 zma:100286172	100191564 732806 100283803 103636624 100382466 103646581 100286172	GRMZM2G146463 rf2, GRMZM2G058675 GRMZM2G035421 AY110479 GRMZM2G092588
			Phenylpropanoid biosynthesis	17	242	0.241899	0.963907	Zm00001d044339 Zm00001d022458 Zm00001d009140 Zm00001d022457 Zm00001d047066 Zm00001d050572 Zm00001d015513 Zm00001d047064 Zm00001d028349 Zm00001d028348 Zm00001d028347 Zm00001d045101 Zm00001d010218 Zm00001d024753 Zm00001d050490 Zm00001d044340 Zm00001d009138	zma:541913 zma:100125639 zma:100285056 zma:100383323 zma:103638909 zma:103653548 zma:100285564 zma:103640218 zma:100280077 zma:100192603 zma:103633271 zma:100382657 zma:103635633 zma:100281950 zma:100502335 zma:541914 zma:100273061	541913 100125639 100285056 100383323 103638909 103653548 100285564 103640218 100280077 100192603 103633271 100382657 103635633 100281950 100502335 541914 100273061	rf2c PER70, GRMZM2G025441, POX2B, PRX70, pmPOX2b GRMZM2G061088 GRMZM2G427815 GRMZM2G103169 GRMZM2G057328 GRMZM2G116452 GRMZM2G116823 GRMZM2G117365 GRMZM2G177792 GRMZM2G108133 aldh5, GRMZM2G097706, rf2d
			Linoleic acid metabolism	2	16	0.255154	0.963907	Zm00001d037139 Zm00001d013014	zma:103636624 zma:100382466	103636624 100382466	GRMZM2G035421 AY110479
			Cutin, suberine and wax biosynthesis	3	31	0.279885	0.963907	Zm00001d017528 Zm00001d017952 Zm00001d017953	zma:100192011 zma:100283710 zma:100282316	100192011 100283710 100282316	GRMZM2G020500 GRMZM2G090505 GRMZM2G090609
			Glutathione metabolism	10	139	0.289641	0.963907	Zm00001d002426 Zm00001d037079 Zm00001d021772 Zm00001d046112 Zm00001d048558 Zm00001d048560 Zm00001d047379 Zm00001d041939 Zm00001d048559 Zm00001d047448	zma:100272974 zma:100272844 zma:103633296 zma:732743 zma:541838 zma:103639633 zma:541831 zma:542476 zma:542491 zma:100283257	100272974 100272844 103633296 732743 541838 103639633 541831 542476 542491 100283257	GRMZM2G156227 GRMZM2G012479 spesyn, GRMZM2G047867, spds2 GRMZM2G161905 GRMZM2G161827 gst13, GRMZM2G126781 apx2, GRMZM2G140667, apx gst35 pco114914, GRMZM2G329144
			Nucleotide excision repair	9	125	0.303145	0.963907	Zm00001d028000 Zm00001d013116 Zm00001d012722 Zm00001d050611 Zm00001d028084 Zm00001d034361 Zm00001d034399 Zm00001d026089 Zm00001d014584	zma:103639334 zma:103625822 zma:100194011 zma:100279971 zma:103632168 zma:103625822 zma:100193357 zma:100282678 zma:100285903	103639334 103625822 100194011 100279971 103632168 103625822 100193357 100282678 100285903	GRMZM2G180539 GRMZM2G005536, GRMZM2G148626 GRMZM2G388915 pco093185f pco108913 GRMZM2G061485
			Glyoxylate and dicarboxylate metabolism	8	110	0.309816	0.963907	Zm00001d032695 Zm00001d011367 Zm00001d047085 Zm00001d035405 Zm00001d011368 Zm00001d037514 Zm00001d000279 Zm00001d009738	zma:542598 zma:103636074 zma:103638939 zma:541946 zma:103636074 zma:845212 zma:845212 zma:103637040	542598 103636074 103638939 541946 103636074 845212 845212 103637040	mdh5, GRMZM2G415359, mdh4 GRMZM2G147714 GRMZM2G104310 GRMZM2G147714 rbcL, ZemaCp032 rbcL, ZemaCp032
			Butanoate metabolism	3	33	0.310017	0.963907	Zm00001d037507 Zm00001d003522 Zm00001d053776	zma:103631410 zma:100273302 zma:100284047	103631410 100273302 100284047	GRMZM2G355906
			Carotenoid biosynthesis	4	48	0.311313	0.963907	Zm00001d051556 Zm00001d013015 Zm00001d033377 Zm00001d051554	zma:103627610 zma:100282128 zma:100383768 zma:100383693	103627610 100282128 100383768 100383693	GRMZM2G150363 sca1 GRMZM2G179147
			ABC transporters	3	34	0.325129	0.963907	Zm00001d053706 Zm00001d045097 Zm00001d025703	zma:103654853 zma:103637972 zma:103641772	103654853 103637972 103641772	GRMZM2G081573 GRMZM2G111462
			Proteasome	7	99	0.352137	0.963907	Zm00001d018456 Zm00001d011021 Zm00001d042228 Zm00001d018403 Zm00001d022573 Zm00001d039483 Zm00001d053616	zma:103628822 zma:103637312 zma:100217091 zma:100217091 zma:100501403 zma:100282470 zma:100273032	103628822 103637312 100217091 100217091 100501403 100282470 100273032	GRMZM2G056569 GRMZM2G073077 GRMZM2G137528
			One carbon pool by folate	2	21	0.356939	0.963907	Zm00001d009738 Zm00001d050448	zma:103637040 zma:103653497	103637040 103653497	NA
			Flavone and flavonol biosynthesis	1	7	0.359954	0.963907	Zm00001d017077	zma:100273383	100273383	GRMZM2G025832
			Biosynthesis of unsaturated fatty acids	4	52	0.361299	0.963907	Zm00001d012221 Zm00001d017840 Zm00001d017841 Zm00001d012317	zma:100273826 zma:100191328 zma:100381639 zma:100285661	100273826 100191328 100381639 100285661	cl27608_1, GRMZM2G316362 GRMZM2G056252 GRMZM2G161792
			Protein processing in endoplasmic reticulum	20	316	0.366219	0.963907	Zm00001d033906 Zm00001d035244 Zm00001d004639 Zm00001d053606 Zm00001d048687 Zm00001d034411 Zm00001d013111 Zm00001d051607 Zm00001d027707 Zm00001d005248 Zm00001d030429 Zm00001d042922 Zm00001d021498 Zm00001d047550 Zm00001d047553 Zm00001d028555 Zm00001d004640 Zm00001d009912 Zm00001d031325 Zm00001d047525	zma:100282141 zma:100382688 zma:103652905 zma:103639061 zma:103652717 zma:100279874 zma:100382437 zma:100279899 zma:103639569 zma:100191802 zma:100286003 zma:103651028 zma:103633177 zma:100382437 zma:542293 zma:100274593 zma:100191508 zma:103635523 zma:100281798 zma:732809	100282141 100382688 103652905 103639061 103652717 100279874 100382437 100279899 103639569 100191802 100286003 103651028 103633177 100382437 542293 100274593 100191508 103635523 100281798 732809	pco144169, GRMZM2G158489 GRMZM2G045987 GRMZM2G075104 HSP70 TIDP2729, GRMZM2G035985 GRMZM2G134917 GRMZM2G020040 GRMZM2G063060 GRMZM2G051367 pco121171 GRMZM2G117612 GRMZM2G134917 hsp18a, GRMZM2G404249, HSP18 IDPC175 GRMZM2G056695 GRMZM2G351775 GRMZM2G080724 bip2, BIPE3
			Photosynthesis	7	101	0.370048	0.963907	Zm00001d034760 Zm00001d029049 Zm00001d000282 Zm00001d000272 Zm00001d000260 Zm00001d000277 Zm00001d034099	zma:542276 zma:100282043 zma:845200 zma:845195 zma:845202 zma:845170 zma:103640685	542276 100282043 845200 845195 845202 845170 103640685	fdx3 GRMZM2G056424 psbB, ZemaCp048 psaA, ZemaCp023 psbD, ZemaCp007 atpB, ZemaCp031
			Regulation of autophagy	4	53	0.373808	0.963907	Zm00001d011984 Zm00001d052638 Zm00001d035245 Zm00001d017403	zma:103636340 zma:103627860 zma:100240690 zma:100278308	103636340 103627860 100240690 100278308	GRMZM2G027857 GRMZM2G179662 Atg4a, GRMZM2G064212, GRMZM2G458441
			Biosynthesis of amino acids	23	371	0.388094	0.963907	Zm00001d008379 Zm00001d046676 Zm00001d003953 Zm00001d029025 Zm00001d045347 Zm00001d045344 Zm00001d045340 Zm00001d045341 Zm00001d050495 Zm00001d009738 Zm00001d034412 Zm00001d042685 Zm00001d034471 Zm00001d033480 Zm00001d003968 Zm00001d021772 Zm00001d008615 Zm00001d030557 Zm00001d027380 Zm00001d045350 Zm00001d028554 Zm00001d047084 Zm00001d006900	zma:100280321 zma:732803 zma:103648719 zma:103634611 zma:103638081 zma:103638081 zma:103638081 zma:103638079 zma:103646581 zma:103637040 zma:103645686 zma:100276531 zma:100193695 zma:100286153 zma:103644539 zma:103633296 zma:100283445 zma:100193705 zma:100284885 zma:103638081 zma:100383381 zma:103640234 zma:103652654	100280321 732803 103648719 103634611 103638081 103638081 103638081 103638079 103646581 103637040 103645686 100276531 100193695 100286153 103644539 103633296 100283445 100193705 100284885 103638081 100383381 103640234 103652654	cys1 orp2, GRMZM2G005024, TSB2 GRMZM2G050077 GRMZM2G003289 GRMZM2G003289 GRMZM2G003289 GRMZM2G104237 GRMZM2G017299 GRMZM2G400604 GRMZM2G004382 TIDP3524, GRMZM2G165747 GRMZM2G010328 GRMZM5G828630 GRMZM2G003289 GRMZM2G481529
			Limonene and pinene degradation	1	8	0.394686	0.963907	Zm00001d045706	zma:732806	732806	rf2, GRMZM2G058675
			Nicotinate and nicotinamide metabolism	2	24	0.4157	0.963907	Zm00001d041077 Zm00001d051927	zma:103650090 zma:100284011	103650090 100284011	NA
			Ascorbate and aldarate metabolism	4	57	0.423524	0.963907	Zm00001d041939 Zm00001d002426 Zm00001d045706 Zm00001d050495	zma:542476 zma:100272974 zma:732806 zma:103646581	542476 100272974 732806 103646581	apx2, GRMZM2G140667, apx GRMZM2G156227 rf2, GRMZM2G058675
			Non-homologous end-joining	1	9	0.427536	0.963907	Zm00001d050612	zma:103653563	103653563	NA
			Lysine degradation	3	41	0.429676	0.963907	Zm00001d045706 Zm00001d050495 Zm00001d009134	zma:732806 zma:103646581 zma:103635090	732806 103646581 103635090	rf2, GRMZM2G058675 GRMZM2G428628
			Fatty acid metabolism	7	108	0.432905	0.963907	Zm00001d045387 Zm00001d017840 Zm00001d017841 Zm00001d012221 Zm00001d012317 Zm00001d019926 Zm00001d023538	zma:103638097 zma:100191328 zma:100381639 zma:100273826 zma:100285661 zma:100192829 zma:103640823	103638097 100191328 100381639 100273826 100285661 100192829 103640823	GRMZM2G056252 GRMZM2G161792 cl27608_1, GRMZM2G316362 GRMZM2G079256 GRMZM2G118286
			Fatty acid degradation	4	59	0.448035	0.963907	Zm00001d045706 Zm00001d050495 Zm00001d023538 Zm00001d012317	zma:732806 zma:103646581 zma:103640823 zma:100285661	732806 103646581 103640823 100285661	rf2, GRMZM2G058675 GRMZM2G118286
			Isoquinoline alkaloid biosynthesis	2	26	0.453344	0.963907	Zm00001d026109 Zm00001d042685	zma:103641967 zma:100276531	103641967 100276531	GRMZM2G400604
			Glycine, serine and threonine metabolism	7	111	0.459648	0.963907	Zm00001d046676 Zm00001d047085 Zm00001d035405 Zm00001d009134 Zm00001d029025 Zm00001d050495 Zm00001d009738	zma:732803 zma:103638939 zma:541946 zma:103635090 zma:103634611 zma:103646581 zma:103637040	732803 103638939 541946 103635090 103634611 103646581 103637040	orp2, GRMZM2G005024, TSB2 GRMZM2G104310 GRMZM2G428628 GRMZM2G050077
			Lysine biosynthesis	2	27	0.471639	0.963907	Zm00001d050495 Zm00001d008615	zma:103646581 zma:100283445	103646581 100283445	GRMZM2G010328
			Selenocompound metabolism	2	27	0.471639	0.963907	Zm00001d033480 Zm00001d004513	zma:100286153 zma:100281036	100286153 100281036	TIDP3524, GRMZM2G165747 GRMZM2G158147
			Glycerophospholipid metabolism	8	130	0.475396	0.963907	Zm00001d034875 Zm00001d028795 Zm00001d046972 Zm00001d037139 Zm00001d040629 Zm00001d020000 Zm00001d013014 Zm00001d009726	zma:103644330 zma:100284438 zma:542548 zma:103636624 zma:100193648 zma:100284438 zma:100382466 zma:103635415	103644330 100284438 542548 103636624 100193648 100284438 100382466 103635415	GRMZM2G422670 cl9125_1, GRMZM2G452529 PIS, GRMZM2G110646 GRMZM2G035421 cl15598_1c, GRMZM2G096010, JD1 cl9125_1, GRMZM2G452529 AY110479 GRMZM2G015692
			Carbon metabolism	22	372	0.475572	0.963907	Zm00001d008379 Zm00001d030059 Zm00001d037514 Zm00001d003953 Zm00001d029025 Zm00001d045347 Zm00001d045344 Zm00001d045340 Zm00001d045341 Zm00001d009738 Zm00001d032695 Zm00001d000279 Zm00001d003968 Zm00001d021772 Zm00001d035405 Zm00001d030557 Zm00001d045350 Zm00001d028554 Zm00001d011367 Zm00001d011368 Zm00001d037294 Zm00001d021908	zma:100280321 zma:100283686 zma:845212 zma:103648719 zma:103634611 zma:103638081 zma:103638081 zma:103638081 zma:103638079 zma:103637040 zma:542598 zma:845212 zma:103644539 zma:103633296 zma:541946 zma:100193705 zma:103638081 zma:100383381 zma:103636074 zma:103636074 zma:542479 zma:100216609	100280321 100283686 845212 103648719 103634611 103638081 103638081 103638081 103638079 103637040 542598 845212 103644539 103633296 541946 100193705 103638081 100383381 103636074 103636074 542479 100216609	cys1 rbcL, ZemaCp032 GRMZM2G050077 GRMZM2G003289 GRMZM2G003289 GRMZM2G003289 GRMZM2G104237 mdh5, GRMZM2G415359, mdh4 rbcL, ZemaCp032 GRMZM2G104310 GRMZM5G828630 GRMZM2G003289 GRMZM2G481529 GRMZM2G147714 GRMZM2G147714 pep7, Ppc1C GRMZM2G072054
			Carbon fixation in photosynthetic organisms	7	113	0.477326	0.963907	Zm00001d003968 Zm00001d030557 Zm00001d032695 Zm00001d037514 Zm00001d037294 Zm00001d003953 Zm00001d000279	zma:103644539 zma:100193705 zma:542598 zma:845212 zma:542479 zma:103648719 zma:845212	103644539 100193705 542598 845212 542479 103648719 845212	GRMZM5G828630 mdh5, GRMZM2G415359, mdh4 rbcL, ZemaCp032 pep7, Ppc1C rbcL, ZemaCp032
			Spliceosome	16	269	0.480373	0.963907	Zm00001d022198 Zm00001d018127 Zm00001d053882 Zm00001d048687 Zm00001d046662 Zm00001d050574 Zm00001d050573 Zm00001d048655 Zm00001d036331 Zm00001d009821 Zm00001d032807 Zm00001d043861 Zm00001d042922 Zm00001d020954 Zm00001d007784 Zm00001d040294	zma:100502129 zma:103627768 zma:100277544 zma:103652717 zma:103640122 zma:103632389 zma:103653151 zma:100192903 zma:103631172 zma:103637060 zma:100501457 zma:103652539 zma:103651028 zma:100272749 zma:100191858 zma:100384520	100502129 103627768 100277544 103652717 103640122 103632389 103653151 100192903 103631172 103637060 100501457 103652539 103651028 100272749 100191858 100384520	GRMZM2G427408 GRMZM2G410393 HSP70 GRMZM2G005737 GRMZM2G057450 GRMZM2G121354, GRMZM2G121374 GRMZM2G390729 GRMZM2G170699 umc2567, GRMZM2G177229 GRMZM2G020928 GRMZM2G038606
			Phagosome	9	149	0.488979	0.963907	Zm00001d046336 Zm00001d023542 Zm00001d027295 Zm00001d016749 Zm00001d009737 Zm00001d004821 Zm00001d034406 Zm00001d048065 Zm00001d026122	zma:100286306 zma:100280656 zma:100273658 zma:103644537 zma:103642971 zma:100280656 zma:103644161 zma:542248 zma:100193453	100286306 100280656 100273658 103644537 103642971 100280656 103644161 542248 100193453	GRMZM2G094497, vpp2 GRMZM2G028432, subunit_C GRMZM2G164696 GRMZM2G028432, subunit_C GRMZM2G120596 tua5, GRMZM2G099167, TUBA5 pco135291a, GRMZM2G003124
			Alanine, aspartate and glutamate metabolism	5	80	0.492155	0.963907	Zm00001d030557 Zm00001d003522 Zm00001d037507 Zm00001d003953 Zm00001d053776	zma:100193705 zma:100273302 zma:103631410 zma:103648719 zma:100284047	100193705 100273302 103631410 103648719 100284047	GRMZM5G828630 GRMZM2G355906
			Metabolic pathways	150	2609	0.501691	0.963907	Zm00001d046972 Zm00001d022460 Zm00001d047064 Zm00001d037514 Zm00001d047066 Zm00001d046112 Zm00001d050572 Zm00001d003953 Zm00001d013013 Zm00001d013015 Zm00001d013014 Zm00001d021338 Zm00001d010218 Zm00001d045387 Zm00001d034412 Zm00001d042685 Zm00001d004642 Zm00001d007917 Zm00001d024753 Zm00001d034099 Zm00001d003968 Zm00001d002124 Zm00001d041531 Zm00001d037507 Zm00001d025199 Zm00001d050611 Zm00001d0…	zma:542548 zma:103633554 zma:103640218 zma:845212 zma:103638909 zma:732743 zma:103653548 zma:103648719 zma:103625782 zma:100282128 zma:100382466 zma:100280079 zma:103635633 zma:103638097 zma:103645686 zma:100276531 zma:100286172 zma:103648899 zma:100281950 zma:103640685 zma:103644539 zma:103645866 zma:103632227 zma:103631410 zma:100383770 zma:100279971 zma:100285661 zma:100281036 zma:100383275 zm…	542548 103633554 103640218 845212 103638909 732743 103653548 103648719 103625782 100282128 100382466 100280079 103635633 103638097 103645686 100276531 100286172 103648899 100281950 103640685 103644539 103645866 103632227 103631410 100383770 100279971 100285661 100281036 100383275 100283692 100383381 100284438 100285004 542479 100284438 100284154 100284895 100285417 100283420 100285056 100037797 1…	PIS, GRMZM2G110646 GRMZM2G025182 GRMZM2G116452 rbcL, ZemaCp032 GRMZM2G103169 spesyn, GRMZM2G047867, spds2 GRMZM2G043453 sca1 AY110479 GRMZM2G095806 GRMZM2G117365 GRMZM2G017299 GRMZM2G400604 GRMZM2G092588 GRMZM2G111909 GRMZM2G177792 GRMZM2G352359 GRMZM2G080547 GRMZM2G090441 GRMZM2G005536, GRMZM2G148626 GRMZM2G158147 GRMZM2G057475 GRMZM2G149224 GRMZM2G481529 cl9125_1, GRMZM2G452529 pco092707, GRMZM…
			Porphyrin and chlorophyll metabolism	4	64	0.507688	0.963907	Zm00001d030549 Zm00001d013013 Zm00001d044186 Zm00001d026115	zma:100272914 zma:103625782 zma:100383208 zma:100383787	100272914 103625782 100383208 100383787	GRMZM2G043453
			Phosphatidylinositol signaling system	6	99	0.507798	0.963907	Zm00001d028795 Zm00001d046972 Zm00001d008278 Zm00001d020000 Zm00001d047447 Zm00001d047618	zma:100284438 zma:542548 zma:100381297 zma:100284438 zma:100191466 zma:100281015	100284438 542548 100381297 100284438 100191466 100281015	cl9125_1, GRMZM2G452529 PIS, GRMZM2G110646 cl9125_1, GRMZM2G452529 GRMZM2G114354 GRMZM2G033846
			Photosynthesis - antenna proteins	2	31	0.54096	0.963907	Zm00001d021906 Zm00001d021784	zma:100282512 zma:100284154	100282512 100284154	GRMZM2G072280 GRMZM2G057281
			Arginine biosynthesis	3	49	0.541126	0.963907	Zm00001d030557 Zm00001d027380 Zm00001d003953	zma:100193705 zma:100284885 zma:103648719	100193705 100284885 103648719	GRMZM5G828630
			Valine, leucine and isoleucine degradation	4	67	0.542056	0.963907	Zm00001d045706 Zm00001d050495 Zm00001d040296 Zm00001d030059	zma:732806 zma:103646581 zma:100280665 zma:100283686	732806 103646581 100280665 100283686	rf2, GRMZM2G058675
			Brassinosteroid biosynthesis	1	13	0.542066	0.963907	Zm00001d053617	zma:103654817	103654817	NA
			Fatty acid biosynthesis	4	68	0.553236	0.963907	Zm00001d012221 Zm00001d019926 Zm00001d045387 Zm00001d023538	zma:100273826 zma:100192829 zma:103638097 zma:103640823	100273826 100192829 103638097 103640823	cl27608_1, GRMZM2G316362 GRMZM2G079256 GRMZM2G118286
			2-Oxocarboxylic acid metabolism	5	86	0.553259	0.963907	Zm00001d030557 Zm00001d034471 Zm00001d046334 Zm00001d021772 Zm00001d003953	zma:100193705 zma:100193695 zma:103638611 zma:103633296 zma:103648719	100193705 100193695 103638611 103633296 103648719	GRMZM5G828630 GRMZM2G004382 GRMZM2G138248
			Pantothenate and CoA biosynthesis	2	34	0.588657	0.963907	Zm00001d034471 Zm00001d021506	zma:100193695 zma:100283449	100193695 100283449	GRMZM2G004382 bas1, GRMZM2G077673, upb1
			Ribosome biogenesis in eukaryotes	7	128	0.603134	0.963907	Zm00001d029046 Zm00001d044054 Zm00001d038475 Zm00001d034105 Zm00001d013058 Zm00001d034125 Zm00001d024955	zma:103634616 zma:100282843 zma:103630487 zma:541825 zma:103625805 zma:542637 zma:103652231	103634616 100282843 103630487 541825 103625805 542637 103652231	GRMZM2G399320 TIDP3014 GRMZM2G405052, GRMZM5G807823 GRMZM5G845755 GRMZM5G872217 gpm388c, ACK2, GRMZM2G143602
			Glycosaminoglycan degradation	1	16	0.612674	0.963907	Zm00001d018404	zma:100501670	100501670	GRMZM2G083812
			alpha-Linolenic acid metabolism	3	55	0.615923	0.963907	Zm00001d037139 Zm00001d012317 Zm00001d013014	zma:103636624 zma:100285661 zma:100382466	103636624 100285661 100382466	GRMZM2G035421 AY110479
			Ubiquinone and other terpenoid-quinone biosynthesis	3	55	0.615923	0.963907	Zm00001d043249 Zm00001d025358 Zm00001d025819	zma:100283201 zma:100194079 zma:100384459	100283201 100194079 100384459	csu690, GRMZM2G138800 GRMZM2G099729
			AGE-RAGE signaling pathway in diabetic complications	1	17	0.633705	0.963907	Zm00001d047447	zma:100191466	100191466	GRMZM2G114354
			Protein export	4	76	0.637068	0.963907	Zm00001d033479 Zm00001d037422 Zm00001d047525 Zm00001d027293	zma:100280989 zma:100285791 zma:732809 zma:100191673	100280989 100285791 732809 100191673	umc2510, GRMZM2G154151 bip2, BIPE3 spr1, GRMZM2G060296
			Cyanoamino acid metabolism	3	57	0.638946	0.963907	Zm00001d046334 Zm00001d050490 Zm00001d009738	zma:103638611 zma:100502335 zma:103637040	103638611 100502335 103637040	GRMZM2G138248 GRMZM2G108133
			Oxidative phosphorylation	9	170	0.640284	0.963907	Zm00001d046336 Zm00001d021554 Zm00001d022024 Zm00001d023542 Zm00001d004821 Zm00001d048204 Zm00001d007775 Zm00001d000277 Zm00001d009727	zma:100286306 zma:100191627 zma:100382609 zma:100280656 zma:100280656 zma:100285417 zma:542303 zma:845170 zma:103651601	100286306 100191627 100382609 100280656 100280656 100285417 542303 845170 103651601	GRMZM2G094497, vpp2 csu657(atpd), GRMZM2G138220, atp3 cl3071_3, GRMZM2G064896 GRMZM2G028432, subunit_C GRMZM2G028432, subunit_C mha1, GRMZM2G144821, Zmpma1, pma1 atpB, ZemaCp031
			Plant-pathogen interaction	11	209	0.652822	0.963907	Zm00001d013109 Zm00001d047618 Zm00001d024003 Zm00001d008278 Zm00001d035848 Zm00001d013105 Zm00001d029028 Zm00001d041165 Zm00001d030429 Zm00001d045359 Zm00001d050575	zma:541988 zma:100281015 zma:103641008 zma:100381297 zma:100283544 zma:103625819 zma:100382070 zma:103641008 zma:100286003 zma:542356 zma:100283091	541988 100281015 103641008 100381297 100283544 103625819 100382070 103641008 100286003 542356 100283091	cl146_1, GRMZM2G320506 GRMZM2G033846 GRMZM2G003059, GRMZM2G341379 GRMZM2G027351 IDP554, GRMZM2G312661 GRMZM2G003059, GRMZM2G341379 pco121171 mek1, GRMZM2G167856 si606018d05, GRMZM2G140095
			Taurine and hypotaurine metabolism	1	19	0.672406	0.963907	Zm00001d003522	zma:100273302	100273302	GRMZM2G355906
			RNA degradation	9	176	0.678709	0.963907	Zm00001d047086 Zm00001d050145 Zm00001d034013 Zm00001d015314 Zm00001d046017 Zm00001d020956 Zm00001d033842 Zm00001d028554 Zm00001d040294	zma:100383837 zma:103653357 zma:103649879 zma:100383871 zma:103653357 zma:100286241 zma:100384304 zma:100383381 zma:100384520	100383837 103653357 103649879 100383871 103653357 100286241 100384304 100383381 100384520	pco124991(180), GRMZM2G024882 GRMZM2G365374 cl22768_2 GRMZM2G481529 GRMZM2G038606
			Endocytosis	14	270	0.682348	0.963907	Zm00001d016049 Zm00001d048687 Zm00001d050122 Zm00001d028003 Zm00001d022465 Zm00001d016749 Zm00001d045870 Zm00001d013059 Zm00001d037415 Zm00001d030385 Zm00001d037417 Zm00001d009915 Zm00001d042922 Zm00001d028002	zma:100192764 zma:103652717 zma:100284688 zma:100284701 zma:100273564 zma:103644537 zma:103638323 zma:100279276 zma:100276474 zma:100284261 zma:100276474 zma:103636553 zma:103651028 zma:100285194	100192764 103652717 100284688 100284701 100273564 103644537 103638323 100279276 100276474 100284261 100276474 103636553 103651028 100285194	IDP207, GRMZM2G109315 HSP70 GRMZM2G174246 GRMZM2G047178 pco085879, GRMZM5G844195 umc2756 GRMZM2G172581 umc2756
			mRNA surveillance pathway	9	179	0.696961	0.963907	Zm00001d034876 Zm00001d053702 Zm00001d015665 Zm00001d033370 Zm00001d022198 Zm00001d025100 Zm00001d042133 Zm00001d007772 Zm00001d040295	zma:100279987 zma:100384234 zma:100384234 zma:100280472 zma:100502129 zma:100384492 zma:100285224 zma:103632085 zma:103636269	100279987 100384234 100384234 100280472 100502129 100384492 100285224 103632085 103636269	AY109916, GRMZM2G422649 GRMZM2G040094 GRMZM2G040094 TIDP3263, GRMZM2G003607 GRMZM2G427408 GRMZM5G801457, GRMZM5G850607 GRMZM2G030902 GRMZM2G013065 SR45_2, GRMZM2G133926
			Propanoate metabolism	2	42	0.69748	0.963907	Zm00001d021908 Zm00001d030059	zma:100216609 zma:100283686	100216609 100283686	GRMZM2G072054
			DNA replication	6	122	0.699951	0.963907	Zm00001d028000 Zm00001d012722 Zm00001d050611 Zm00001d034399 Zm00001d026089 Zm00001d014584	zma:103639334 zma:100194011 zma:100279971 zma:100193357 zma:100282678 zma:100285903	103639334 100194011 100279971 100193357 100282678 100285903	GRMZM2G180539 GRMZM2G005536, GRMZM2G148626 pco093185f pco108913 GRMZM2G061485
			Monobactam biosynthesis	1	21	0.707022	0.963907	Zm00001d004513	zma:100281036	100281036	GRMZM2G158147
			Tropane, piperidine and pyridine alkaloid biosynthesis	1	21	0.707022	0.963907	Zm00001d042685	zma:100276531	100276531	GRMZM2G400604
			Homologous recombination	5	106	0.726101	0.963907	Zm00001d050612 Zm00001d028000 Zm00001d012722 Zm00001d050611 Zm00001d014584	zma:103653563 zma:103639334 zma:100194011 zma:100279971 zma:100285903	103653563 103639334 100194011 100279971 100285903	GRMZM2G180539 GRMZM2G005536, GRMZM2G148626 GRMZM2G061485
			Ribosome	26	504	0.73138	0.963907	Zm00001d037929 Zm00001d022462 Zm00001d022463 Zm00001d000121 Zm00001d000120 Zm00001d045364 Zm00001d045367 Zm00001d013730 Zm00001d035087 Zm00001d050199 Zm00001d022197 Zm00001d032139 Zm00001d005753 Zm00001d035838 Zm00001d021508 Zm00001d016333 Zm00001d046109 Zm00001d009343 Zm00001d051929 Zm00001d031575 Zm00001d004641 Zm00001d006899 Zm00001d019999 Zm00001d005247 Zm00001d003683 Zm00001d011992	zma:100193240 zma:100192878 zma:100192778 zma:100383683 zma:100216896 zma:103639719 zma:100284007 zma:100283916 zma:542719 zma:100283101 zma:100283458 zma:100194399 zma:103649148 zma:103654171 zma:100284349 zma:103633018 zma:100272919 zma:103636950 zma:100282990 zma:103652281 zma:103625731 zma:542640 zma:103633877 zma:103633877 zma:101027258 zma:100282254	100193240 100192878 100192778 100383683 100216896 103639719 100284007 100283916 542719 100283101 100283458 100194399 103649148 103654171 100284349 103633018 100272919 103636950 100282990 103652281 103625731 542640 103633877 103633877 101027258 100282254	GRMZM2G078985 pco085865, GRMZM2G322413 GRMZM2G063617 cl25046_1a, GRMZM2G069762 GRMZM2G008923 GRMZM2G065956 pco090715, GRMZM2G067306 arpp1a, GRMZM2G032315, rpp1a pco155588b GRMZM2G171501 GRMZM2G108008 GRMZM2G470608 GRMZM2G084757 GRMZM2G170420 pco134753 GRMZM2G394122 GRMZM2G125300 rps6-2, GRMZM5G851698 GRMZM2G135727 GRMZM2G145280
			Fatty acid elongation	2	45	0.731669	0.963907	Zm00001d018455 Zm00001d048061	zma:100286138 zma:103639429	100286138 103639429	GRMZM5G854500
			Inositol phosphate metabolism	4	87	0.734388	0.963907	Zm00001d034875 Zm00001d047447 Zm00001d048201 Zm00001d046972	zma:103644330 zma:100191466 zma:100037797 zma:542548	103644330 100191466 100037797 542548	GRMZM2G422670 GRMZM2G114354 mips2, GRMZM2G004528 PIS, GRMZM2G110646
			Stilbenoid, diarylheptanoid and gingerol biosynthesis	1	23	0.737985	0.963907	Zm00001d021562	zma:100272924	100272924	GRMZM2G175812
			Tyrosine metabolism	2	46	0.742313	0.963907	Zm00001d026109 Zm00001d042685	zma:103641967 zma:100276531	103641967 100276531	GRMZM2G400604
			Circadian rhythm - plant	3	69	0.756454	0.963907	Zm00001d034105 Zm00001d046402 Zm00001d034125	zma:541825 zma:103638645 zma:542637	541825 103638645 542637	GRMZM5G845755 GRMZM2G140355 gpm388c, ACK2, GRMZM2G143602
			Starch and sucrose metabolism	12	251	0.771083	0.963907	Zm00001d028351 Zm00001d012748 Zm00001d028243 Zm00001d022460 Zm00001d022567 Zm00001d002124 Zm00001d048979 Zm00001d021903 Zm00001d048980 Zm00001d022104 Zm00001d050490 Zm00001d031577	zma:103640441 zma:103636651 zma:100191471 zma:103633554 zma:100284955 zma:103645866 zma:100501516 zma:100282931 zma:100281927 zma:103633411 zma:100502335 zma:103642738	103640441 103636651 100191471 103633554 100284955 103645866 100501516 100282931 100281927 103633411 100502335 103642738	GRMZM2G118462 GRMZM2G111324 GRMZM2G025182 GRMZM2G112984 GRMZM2G352359 GRMZM2G008507 GRMZM2G072526 gpm600, GRMZM2G122231 GRMZM2G037411 GRMZM2G108133 GRMZM2G161233
			Base excision repair	2	50	0.781334	0.963907	Zm00001d012722 Zm00001d050611	zma:100194011 zma:100279971	100194011 100279971	GRMZM2G005536, GRMZM2G148626
			Phenylalanine, tyrosine and tryptophan biosynthesis	3	73	0.788046	0.963907	Zm00001d006900 Zm00001d042685 Zm00001d046676	zma:103652654 zma:100276531 zma:732803	103652654 100276531 732803	GRMZM2G400604 orp2, GRMZM2G005024, TSB2
			Plant hormone signal transduction	17	355	0.800487	0.963907	Zm00001d053884 Zm00001d019555 Zm00001d009461 Zm00001d037295 Zm00001d052126 Zm00001d003074 Zm00001d004578 Zm00001d009462 Zm00001d041418 Zm00001d051911 Zm00001d047445 Zm00001d047563 Zm00001d028552 Zm00001d051889 Zm00001d037316 Zm00001d037317 Zm00001d011202	zma:103654922 zma:100283359 zma:100281419 zma:100281166 zma:100127531 zma:103635987 zma:103643117 zma:100281419 zma:100192924 zma:100273242 zma:100216611 zma:100279789 zma:100281166 zma:103654108 zma:107403067 zma:107403067 zma:100281468	103654922 100283359 100281419 100281166 100127531 103635987 103643117 100281419 100192924 100273242 100216611 100279789 100281166 103654108 107403067 107403067 100281468	Orphan120, GRMZM2G148056, GRMZM2G148056_T01 PIL5, GRMZM2G165042 si687013d08, GRMZM2G137582 GRMZM2G024973, d9 GRMZM2G001243, GRMZM2G437575 PIL5, GRMZM2G165042 umc1527, AUX35, GRMZM2G167794, GRMZM2G167794_T01 AUX27, GRMZM2G142768, GRMZM2G142768_T01 umc1357, GRMZM2G317584 si687013d08, GRMZM2G137582 magi100654
			Glycosylphosphatidylinositol(GPI)-anchor biosynthesis	1	28	0.801834	0.963907	Zm00001d016990	zma:103627347	103627347	GRMZM5G884270
			Biotin metabolism	1	28	0.801834	0.963907	Zm00001d019926	zma:100192829	100192829	GRMZM2G079256
			Valine, leucine and isoleucine biosynthesis	1	29	0.812602	0.966569	Zm00001d034471	zma:100193695	100193695	GRMZM2G004382
			N-Glycan biosynthesis	2	55	0.822747	0.968441	Zm00001d005248 Zm00001d018457	zma:100191802 zma:103627887	100191802 103627887	GRMZM2G051367
			RNA polymerase	2	57	0.837241	0.974322	Zm00001d000270 Zm00001d019553	zma:845225 zma:100285004	845225 100285004	rpoB, ZemaCp013 pco092707, GRMZM2G146331
			Pyruvate metabolism	5	126	0.844987	0.974322	Zm00001d045706 Zm00001d050495 Zm00001d032695 Zm00001d037294 Zm00001d030240	zma:732806 zma:103646581 zma:542598 zma:542479 zma:100216606	732806 103646581 542598 542479 100216606	rf2, GRMZM2G058675 mdh5, GRMZM2G415359, mdh4 pep7, Ppc1C AY110374, GRMZM2G120300
			Biosynthesis of secondary metabolites	76	1481	0.854812	0.975251	Zm00001d043249 Zm00001d008379 Zm00001d045340 Zm00001d046676 Zm00001d008370 Zm00001d047064 Zm00001d022458 Zm00001d028348 Zm00001d031019 Zm00001d029025 Zm00001d030549 Zm00001d013013 Zm00001d021772 Zm00001d013015 Zm00001d013014 Zm00001d028349 Zm00001d045341 Zm00001d028347 Zm00001d050495 Zm00001d010218 Zm00001d050490 Zm00001d009738 Zm00001d050150 Zm00001d032695 Zm00001d047143 Zm00001d015513 Zm00001d0…	zma:100283201 zma:100280321 zma:103638081 zma:732803 zma:100502524 zma:103640218 zma:100125639 zma:100192603 zma:541874 zma:103634611 zma:100272914 zma:103625782 zma:103633296 zma:100282128 zma:100382466 zma:100280077 zma:103638079 zma:103633271 zma:103646581 zma:103635633 zma:100502335 zma:103637040 zma:100382527 zma:542598 zma:103638967 zma:100285564 zma:100193695 zma:103645686 zma:107521951 zm…	100283201 100280321 103638081 732803 100502524 103640218 100125639 100192603 541874 103634611 100272914 103625782 103633296 100282128 100382466 100280077 103638079 103633271 103646581 103635633 100502335 103637040 100382527 542598 103638967 100285564 100193695 103645686 107521951 100276531 100273383 100383768 103654926 103650282 100383787 100286153 100281950 103651988 103644539 103644330 10027292…	csu690, GRMZM2G138800 cys1 GRMZM2G003289 orp2, GRMZM2G005024, TSB2 GRMZM2G058404 GRMZM2G116452 PER70, GRMZM2G025441, POX2B, PRX70, pmPOX2b HMT-2, GRMZM2G117240 GRMZM2G050077 GRMZM2G043453 sca1 AY110479 GRMZM2G104237 GRMZM2G116823 GRMZM2G117365 GRMZM2G108133 mdh5, GRMZM2G415359, mdh4 GRMZM2G057328 GRMZM2G004382 GRMZM2G017299 GRMZM2G400604 GRMZM2G025832 GRMZM2G065494 TIDP3524, GRMZM2G165747 GRMZM2G…
			Basal transcription factors	2	61	0.863054	0.975251	Zm00001d020896 Zm00001d041530	zma:100384748 zma:103650604	100384748 103650604	si660063f11
			Ubiquitin mediated proteolysis	7	178	0.880361	0.984958	Zm00001d053606 Zm00001d013116 Zm00001d043251 Zm00001d034404 Zm00001d033374 Zm00001d032810 Zm00001d034361	zma:103639061 zma:103625822 zma:100283953 zma:100192052 zma:100280549 zma:100192978 zma:103625822	103639061 103625822 100283953 100192052 100280549 100192978 103625822	GRMZM2G075104 GRMZM2G120674 GRMZM2G007381 IDP190, GRMZM2G144782
			Amino sugar and nucleotide sugar metabolism	7	186	0.904482	0.987663	Zm00001d053886 Zm00001d041531 Zm00001d003970 Zm00001d018402 Zm00001d025199 Zm00001d029794 Zm00001d031577	zma:103654924 zma:103632227 zma:100383496 zma:103644815 zma:100383770 zma:100191592 zma:103642738	103654924 103632227 100383496 103644815 100383770 100191592 103642738	GRMZM2G080547 GRMZM2G155729 GRMZM2G090441 GRMZM2G099454 GRMZM2G161233
			Citrate cycle (TCA cycle)	3	98	0.916891	0.987663	Zm00001d032695 Zm00001d021772 Zm00001d021908	zma:542598 zma:103633296 zma:100216609	542598 103633296 100216609	mdh5, GRMZM2G415359, mdh4 GRMZM2G072054
			Flavonoid biosynthesis	1	44	0.918978	0.987663	Zm00001d017077	zma:100273383	100273383	GRMZM2G025832
			Terpenoid backbone biosynthesis	2	75	0.926546	0.987663	Zm00001d004576 Zm00001d008370	zma:103635372 zma:100502524	103635372 100502524	GRMZM2G058404
			Pyrimidine metabolism	6	176	0.934341	0.987663	Zm00001d019553 Zm00001d050448 Zm00001d012722 Zm00001d050611 Zm00001d000270 Zm00001d021506	zma:100285004 zma:103653497 zma:100194011 zma:100279971 zma:845225 zma:100283449	100285004 103653497 100194011 100279971 845225 100283449	pco092707, GRMZM2G146331 GRMZM2G005536, GRMZM2G148626 rpoB, ZemaCp013 bas1, GRMZM2G077673, upb1
			Phenylalanine metabolism	1	48	0.935221	0.987663	Zm00001d042685	zma:100276531	100276531	GRMZM2G400604
			Aminoacyl-tRNA biosynthesis	3	111	0.950762	0.990878	Zm00001d035789 Zm00001d026115 Zm00001d021507	zma:103635898 zma:100383787 zma:103633183	103635898 100383787 103633183	GRMZM2G455085
			Fructose and mannose metabolism	2	96	0.972311	0.990878	Zm00001d003968 Zm00001d037532	zma:103644539 zma:541911	103644539 541911	GRMZM2G021846, pfk1
			Glycolysis / Gluconeogenesis	5	193	0.984626	0.990878	Zm00001d003968 Zm00001d029025 Zm00001d045706 Zm00001d028554 Zm00001d050495	zma:103644539 zma:103634611 zma:732806 zma:100383381 zma:103646581	103644539 103634611 732806 100383381 103646581	GRMZM2G050077 rf2, GRMZM2G058675 GRMZM2G481529
			Purine metabolism	6	227	0.988637	0.990878	Zm00001d050150 Zm00001d019553 Zm00001d012722 Zm00001d050611 Zm00001d004513 Zm00001d000270	zma:100382527 zma:100285004 zma:100194011 zma:100279971 zma:100281036 zma:845225	100382527 100285004 100194011 100279971 100281036 845225	pco092707, GRMZM2G146331 GRMZM2G005536, GRMZM2G148626 GRMZM2G158147 rpoB, ZemaCp013
			Galactose metabolism	1	80	0.989207	0.990878	Zm00001d019552	zma:100191564	100191564	GRMZM2G146463
			Pentose phosphate pathway	1	83	0.990878	0.990878	Zm00001d003968	zma:103644539	103644539	NA
