# Supplementary material for: Transcriptomic and Genome-wide Association Study Reveal Long Noncoding RNAs&nbsp;Responding to Nitrogen Deficiency in Maize
Source: Research Square preprint supplement (doi:10.21203/rs.3.rs-104831/v1), 2020-11-13
Supplement: Supplementary file 5 [file acd93a9e00382dece5d2d550.xlsx]

## Sheet: Sheet1
	Supporting Table 10. The information of primer sequences used in this study

## Sheet: lncRNA
	lncRNA	F	R
RT-qPCR	LNC_002923	GGAAGAAGGTGGATAAGAA	AAAGAGAGGGAATAGACAAA
	LNC_004850	GAACTCAGCCTCGTCAGA	TATCCATCCATCATCCGTCAA
	LNC_000761	CCAGGTCATCAGGGTCAA	GGCATAATCCGCACTCAG
	LNC_003032	GTGGTTCTAATGCGGTAT	TCTGCCTTTGTTTATGAGT
	LNC_000852	GTCGTTCCATCCGTCGTC	CACCACCTCTGCTCTACAT
	LNC_000497	GAGAATCCCATTACGACG	GACGAGCCTATCCAAATC
	LNC_001940	TACATAACACTCTCATTGG	ATGGTTCGTTCTTAGTTG
	LNC_002398	AAGTGGTATCAGAGGAAT	GAGTAAGGTAAGTAGGTAAG
	LNC_000859	GTCCTATTACCAGCGTTA	GAATCTAAGAACCTCACTCA
	LNC_003272	ACACAGTTGAACCATTAGATAG	CAGAGTCGCAGGAGATAA
cDNA amplify	LNC_002923	GTTCACTGATTTTTCTACCGCCGAG	CAGTGATTTCTACACGCGTGGATCT
	LNC_003272	GAAAAATCCAGCCGCCTTTGTTTTTGATTT	ATGGGGATCGAGAGGAACGTGCACAGAGAA
	LNC_002923mut	aatagcttgttgcctcgcgCTCCCACCTCCCATGGTTG	cgaggcaacaagctattagGTCGGGCTGGGGGCTGGG
	LNC_003272mut	aatctattcggaggcgtaaCCGAATCTCGCGCGCCCT	acgcctccgaatagattacGCGGCCAGGGAAGCTCCA

## Sheet: mRNA
	Gene ID	F	R
RT-qPCR	Zm00001d015521	AAGTATCGGCTGTATCTG	AATGGTTAGTGGTTGGAA
	Zm00001d023434	CGTAGTCCAAGAAGAACA	CTGCCATCTGAGTCATAT
	Zm00001d041472	GATTGGTTGCGTATATTATGG	TTCTACTCCTTGCCTCAT
	Zm00001d003414	CGATGAGCCTACGACTAC	ACACGAGCAAATAATGGAAC
	Zm00001d014564	GAGGAATCGTGTATGTAA	AGAAAGAAGAAACCCAAA
	Zm00001d048736	GCAAGCAGTACAAGTA	GAGAGTGAAGGAAGAC
	Zm00001d048907	CTACTTGCTACCTCCTG	TCTCCTTCTCCTGTCA
	Zm00001d048998	GGTATCGTCGTCTTCT	CGTAGCCATAGTCTCC
	Zm00001d049016	CGATGTGACGAGCAAGAG	CGGACGCAACGGAGAAC
	Zm00001d049380	TGATGAGACAGAAGAAGA	TGGAGGAAGGATAACAC
	Zm00001d049400	AGGATTAGCGATGAGTAG	CACAGACGAACACAAC
	Zm00001d050043	GGCGGCTATTCGTAATG	AAGGTGATGCTGTCTGTA
	Zm00001d050259	GAGGTAGTGGAGGTGGAA	GCAGTGTTGTTGTTATAGGTAG
	Zm00001d051586	TCTGTCCGTCGCCAAGT	CGCTCCATCATCCGCAAT
	Zm00001d051634	GTTGGTAGTTCGTTCA	AGATGGTATGTGTATGTG
	Zm00001d051684	GCTCTCACACGATACAAG	CGCATTCAAGGCTCAG
	Zm00001d051804	AATCCTCCTCCAATAATAG	AATCTGACATCGCATC
cDNA amplify	Zm00001d003414	CTTGAATCCGTGCCTGCTCTAATAG	CATTTAACCATGGAGATATTCCACC
	Zm00001d015521	GAAAGCGTAATAAAAGGAAAACGAAAGGAG	GGCTCATAACCATGCTGTATATATCACGAT
	Zm00001d023434	GACGAATGATGGTGCCATACTGCCA	AAGCAAGCAGTTCGGGGGGTGCTAT
	Zm00001d041472	ACACATGGCACAAGCACACAG	TAACCAATCTGAAATTCTCCTGATC

## Sheet: miRNA
	miRNA ID
RT-qPCR	zma-miR156d-3p	GCTCACTTCTCTTTCTGTCAGC
	zma-miR156d-5p	TGACAGAAGAGAGTGAGCAC
	zma-miR159c-5p	GAGCTCCCTTCGATCCAATCC
	zma-miR166l-3p	TCGGACCAGGCTTCATTCCTC
	zma-miR167a-5p	TGAAGCTGCCAGCATGATCTA
	zma-miR395a-5p	GTTCTCCTCAAACCACTTCAGTT
	zma-miR395b-3p	GTGAAGTGTTTGGGGGAACTC
	zma-miR395b-5p	GTTCCCTACAAGCACTTCACAA
	zma-miR398a-3p	TGTGTTCTCAGGTCGCCCCCG
	zma-miR159c-3p	CTTGGATTGAAGGGAGCTCCT
	zma-miR164a-5p	TGGAGAAGCAGGGCACGTGCA
	preMut_miR159c	CTTGTATGTGCTGGAGCTCCG
precursor amplify	Pre-miR164a_F	CCTGAGGGCTCCAACCTTCTTCGT
	Pre-miR164a_R	GGGGGTGCATACCTTTTGATTATC
	Pre-miR159c-3p_F	ATCAAATCAAGGCAAGGCGTGTTG
	Pre-miR159c-3p_R	ACGGGAAGGAAAGGGAGAGAGAGA
	PreMut_miR164a_F	taatagtagcacgtgcgTGCGCATACCATATAGCTAGACG
	PreMut_miR164a_R	cgcacgtgctactattatccaGCGTGGTCCTTGTCACTGATACA
	PreMut_miR159c_F	tgtatgtgctggagctccgCTCTGTCTGTCTGTCTCTCTCTCTCTCT
	PreMut_miR159c_R	gagctccagcacatacaagCACGAGGGAAAGATGATGGC
