# Supplementary material for: Transcriptomic and Genome-wide Association Study Reveal Long Noncoding RNAs&nbsp;Responding to Nitrogen Deficiency in Maize
Source: Research Square preprint supplement (doi:10.21203/rs.3.rs-104831/v1), 2020-11-13
Supplement: Supplementary file 6 [file b0ab7bd7cb05161b3b56bc04.xlsx]

## Sheet: Sheet1
	Known miRNAs and novel miRNAs identified from RNA-Seq.

## Sheet: novel miRNA
>novel_101*
aaauuuccuuaggcgugguaaacu
>novel_101
guuugucacgucuaagggaaucuu
>novel_103
agcugauuuggugauuagggaucu
>novel_103*
aucccuaaucaccaaaucaguccu
>novel_109*
uuuguuucgauaguguaugau
>novel_109
acuguaguuacuauugagacgagu
>novel_110*
uagccaaggaugacuugccuaca
>novel_110
ugggcggucuccuuggcuagc
>novel_113
aauuccggaacaaacgaacacacc
>novel_113*
ugcguucguuuguucaggauuggg
>novel_119*
gguucucgguguuguuguugu
>novel_119
uucgacugcaccgagcgcugc
>novel_138*
aucucacuuggucuguuggauau
>novel_138
aucuaacggaucaaaagacauguu
>novel_139*
aguucgcggcggcugugg
>novel_139
gcggucguggcggaauugc
>novel_145*
ucucagaauaacuaauuagaucuc
>novel_145
aauauaauuggcuacucugagagu
>novel_151
gugaucucuguccaccaaaucagg
>novel_151*
ugauuugguguauagggauuuuga
>novel_153*
ucgauuuugaaucuagcuuuagcg
>novel_153
aaaagaccggucgauaugaacuau
>novel_155
auugcaucuacgacuaggcugacu
>novel_155*
uuggccuagucguagaugcaaugg
>novel_156*
cuauggacccagaugacacaacca
>novel_156
ugugugucaucugugucucuacac
>novel_160
aggacucaaugguuugucgccaug
>novel_160*
uagcgcaugaucaagaguaccaga
>novel_170*
gcagccggcugcaaaucagaaugc
>novel_170
acauucugauuugcagccggcugc
>novel_173*
uucacugguuaucaaaucaguccuu
>novel_173
agacuaguuugcugaucagaaauu
>novel_176*
aacaaguuuauggacccaaau
>novel_176
cuggaucucuaaacuuguuuu
>novel_178
accgguacuaaagaaaggaucuuu
>novel_178*
agauucuuucuuuaauacugguuc
>novel_179*
cgagugaauggcggcggcgguggu
>novel_179
aacggcugcuccguucucuacggc
>novel_18*
ugaagcugccagcaugaucug
>novel_18
agaucauguugcagcuucacu
>novel_180*
cgucgcggucgauuuuauaugauag
>novel_180
guuauauugaauggaucagacggc
>novel_192
gaucugauuccuccggcuaagagu
>novel_192*
ucuguauuggagggaccaggcucu
>novel_196
gcuuaaaccggaugucgacguggc
>novel_196*
cacaucgguauucgguuugaacaa
>novel_202*
guugguuuucaccagaugcguucc
>novel_202
aacguaucuagugcaaaccaacca
>novel_204
aaccgauacuauagagagaccuuu
>novel_204*
aggucucuccauaguaccgguucu
>novel_209
aucugugguuuaaaaguauggcgc
>novel_209*
gccacacuuuuaagcuacacaugu
>novel_211*
uuuccaaacuagcacuuaauagaca
>novel_211
auaauuagggcuaguuuggaaacu
>novel_217*
acgaaucgugcaugcaguucugua
>novel_217
aagaucuguuugcgcuguucgugc
>novel_220*
acuugaacuuagccucgcgucuac
>novel_220
agacguguaucuagcuucgagugc
>novel_221
aggucucuauuacguucuaacagg
>novel_221*
uuaggacgcaauagagacu
>novel_227
acuauuagggcuaguuugaaaacu
>novel_227*
uuuuuaaauuaggccuuaaggucc
>novel_233*
uuuauuaucgauccuaauccaccu
>novel_233
auggauugaggucaauauuagagu
>novel_234
auauugauccuguagcaacguacg
>novel_234*
ugcguugcuacgaaauuaauauga
>novel_243*
ugaagggagaaccuuuu
>novel_243
aagugggcuucuuucaag
>novel_244
aaacgaacuaggccuaagagagcu
>novel_244*
aucccuaaggccucguucguuugu
>novel_249
uagccaaggaugagcugccug
>novel_249*
ggcagccuccuuggcuagu
>novel_251
auuuggugcagucggcugcaaacc
>novel_251*
uuugcagccagcugcaccaaauuu
>novel_252*
gaguccgaaaacuggaggggauua
>novel_252
aucucuuccgguuuuguggcuccu
>novel_256*
aaucaucuuggccaucugag
>novel_256
uagccaagcaugauuugcccgu
>novel_257*
gagcggcggauagacuacaaauau
>novel_257
acguguggucuguugguuagcccu
>novel_259
agcugauuuggugauuagggauca
>novel_259*
acccccuuaucaccaaaucaaucc
>novel_3
ucggaccaggcuucauucccc
>novel_3*
gaauguugucuggcucgaggu
>novel_35
ucgauaaaccucugcauccagc
>novel_35*
ugggcgcagugguuuaucgauc
>novel_36*
acugggcauguuaauuucuuac
>novel_36
auguaagagacgacuaugacaguu
>novel_57*
agguauuggcgcgccucaauc
>novel_57
uugagccgcgucaauaucucc
>novel_66
ccguggcuccugcuccugaug
>novel_66*
uuaggcucggggacuacggug
>novel_71
gcugauuuggugacuggggauccc
>novel_71*
aucccuaaucaccaaaucaguccu
>novel_74
acucacgugguaguuaacucugug
>novel_74*
cggaguuaacuaccacgugggu
>novel_78
ugaaguguuugggggaacuc
>novel_78*
aguucucuucaagcacuucacg
>novel_89*
ugguaguauacagucucugaaaga
>novel_89
cagagagacgugucugacuuagcc
>novel_93
uggcgaugagagugguagcucugg
>novel_93*
ugacucacucuuaccgcccaug
>novel_94
ugauuuuugaguugauucuug
>novel_94*
agaaucaacucaacaaucauaacaa
>novel_99
agauuuaaagugcucguauga
>novel_99*
uaugagcacuuuaaaucuggu

## Sheet: known miRNA
>zma-miR1432-5p
CUCAGGAGAGAUGACACCGAC
>zma-miR1432-3p
GGGUGUCAUCUCGCCUGAAGCA
>zma-miR156a-3p
GCUCACUUCUCUCUCUGUCAGU
>zma-miR156d-3p
GCUCACUUCUCUUUCUGUCAGC
>zma-miR156d-5p
UGACAGAAGAGAGUGAGCAC
>zma-miR156e-3p
GCUCACUGCUCUCUCUGUCAUC
>zma-miR156h-3p
GCUCACUGCUCUUUCUGUCAUC
>zma-miR156i-3p
GCUCACUGCUCUAUCUGUCAUC
>zma-miR156j-3p
UGCUCUCUGCUCUCACUGUCAUC
>zma-miR156j-5p
UGACAGAAGAGAGAGAGCACA
>zma-miR156k-5p
UGACAGAAGAGAGCGAGCAC
>zma-miR156k-3p
GCUCGCUUCUCUUUCUGUCAGC
>zma-miR156l-3p
GCUCACUGCUCUAUCUGUCACC
>zma-miR159a-5p
GAGCUCCUAUCAUUCCAAUGA
>zma-miR159a-3p
UUUGGAUUGAAGGGAGCUCUG
>zma-miR159c-5p
GAGCUCCCUUCGAUCCAAUCC
>zma-miR159c-3p
CUUGGAUUGAAGGGAGCUCCU
>zma-miR159e-3p
AUUGGUUUGAAGGGAGCUCCA
>zma-miR159f-5p
GAGCUCCUCUCAUUCCAAUGA
>zma-miR159h-3p
UUUGGAGUGAAGGGAGCUCUG
>zma-miR160b-3p
GCGUGCAAGGAGCCAAGCAUG
>zma-miR160f-5p
UGCCUGGCUCCCUGUAUGCCG
>zma-miR162-5p
GGGCGCAGUGGUUUAUCGAUC
>zma-miR162-3p
UCGAUAAACCUCUGCAUCCA
>zma-miR164a-5p
UGGAGAAGCAGGGCACGUGCA
>zma-miR164b-3p
AUGUGCCCAUCUUCUCCACC
>zma-miR164c-3p
CAUGUGCCCUUCUUCUCCAUC
>zma-miR164d-3p
CACGUGGUCUCCUUCUCCAU
>zma-miR164e-3p
CAUGUGUCCGCCCUCUCCACC
>zma-miR164e-5p
UGGAGAAGCAGGACACGUGAG
>zma-miR164f-5p
UGGAGAAGCAGGGCACGUGCU
>zma-miR164f-3p
CACGUGCGCUCCUUCUCCAAC
>zma-miR164g-3p
CACGUGCUCCCCUUCUCCACC
>zma-miR164h-5p
UGGAGAAGCAGGGCACGUGUG
>zma-miR166a-5p
GGAAUGUUGUCUGGCUCGGGG
>zma-miR166a-3p
UCGGACCAGGCUUCAUUCCCC
>zma-miR166c-5p
GGAAUGUUGUCUGGCUCGAGG
>zma-miR166h-5p
GGAAUGACGUCCGGUCCGAAC
>zma-miR166h-3p
UCGGACCAGGCUUCAUUCCC
>zma-miR166i-5p
GGAAUGUCGUCUGGCGCGAGA
>zma-miR166k-5p
GGAUUGUUGUCUGGCUCGGGG
>zma-miR166k-3p
UCGGACCAGGCUUCAAUCCCU
>zma-miR166l-3p
UCGGACCAGGCUUCAUUCCUC
>zma-miR166m-5p
GGAAUGUUGGCUGGCUCGAGG
>zma-miR167a-3p
GAUCAUGCAUGACAGCCUCAUU
>zma-miR167a-5p
UGAAGCUGCCAGCAUGAUCUA
>zma-miR167b-3p
GAUCAUGCUGUGACAGUUUCACU
>zma-miR167c-3p
GAUCAUGCUGUGGCAGCCUCACU
>zma-miR167d-3p
GGUCAUGCUGCUGCAGCCUCACU
>zma-miR167e-3p
GAUCAUGCUGUGCAGUUUCAUC
>zma-miR167e-5p
UGAAGCUGCCAGCAUGAUCUG
>zma-miR167f-3p
GAUCGUGCUGCGCAGUUUCACC
>zma-miR167g-3p
GGUCAUGCUGUAGUUUCAUC
>zma-miR167h-3p
GAUCAUGUUGCAGCUUCAC
>zma-miR167j-3p
GAUCAUGUGGCAGUUUCAUU
>zma-miR168a-3p
CCCGCCUUGCACCAAGUGAA
>zma-miR168a-5p
UCGCUUGGUGCAGAUCGGGAC
>zma-miR168b-3p
CCCGCCUUGCAUCAAGUGAA
>zma-miR169a-5p
CAGCCAAGGAUGACUUGCCGA
>zma-miR169a-3p
GGCAAGUUGUUCUUGGCUACA
>zma-miR169c-3p
GGCAAGUCUGUCCUUGGCUACA
>zma-miR169c-5p
CAGCCAAGGAUGACUUGCCGG
>zma-miR169d
UAGCCAAGGAGACUGCCUAUG
>zma-miR169e
UAGCCAAGGAGACUGCCUACG
>zma-miR169f-5p
UAGCCAAGGAUGACUUGCCUA
>zma-miR169i-5p
UAGCCAAGGAUGACUUGCCUG
>zma-miR169i-3p
GGCAGUCUCCUUGGCUAG
>zma-miR169l-5p
UAGCCAGGGAUGAUUUGCCUG
>zma-miR169l-3p
GGCAAAUCAUCCCUGCUACC
>zma-miR169m-3p
GGCAUCCAUUCUUGGCUAAG
>zma-miR169n-3p
GGCAGGCCUUCUUGGCUAAG
>zma-miR169p-5p
UAGCCAAGGAUGACUUGCCGG
>zma-miR171a-3p
UGAUUGAGCCGCGCCAAUAU
>zma-miR171b-3p
UUGAGCCGUGCCAAUAUCAC
>zma-miR171c-3p
UGACUGAGCCGUGCCAAUAUC
>zma-miR171d-5p
UGUUGGCUCGGCUCACUCAGA
>zma-miR171d-3p
UGAUUGAGCCGUGCCAAUAUC
>zma-miR171f-5p
CGAUGUUGGCAUGGCUCAAUC
>zma-miR171g-3p
GAGGUGAGCCGAGCCAAUAUC
>zma-miR171i-5p
UGUUGGCACGGUUCAAUCAAA
>zma-miR171j-5p
UAUUGACGCGGUUCAAUUCGA
>zma-miR171k-3p
GUGAGCCGAACCAAUAUCACU
>zma-miR171k-5p
UGGUAUUGUUUCGGCUCAUGU
>zma-miR171l-3p
GGAUUGAGCCGCGUCAAUAUC
>zma-miR171l-5p
UAUUGGCGUGCCUCAAUCCGA
>zma-miR171m-5p
UAUUGGCGCGCCUCAAUCCGA
>zma-miR172c-5p
CAGCACCACCAAGAUUCACA
>zma-miR172d-5p
CAGCACCAUCAAGAUUCACA
>zma-miR172e
GGAAUCUUGAUGAUGCUGCAU
>zma-miR2118b
UUCCCGAUGCCUCCCAUUCCUA
>zma-miR2118c
UUCCUAAUGCCUCCCAUUCCUA
>zma-miR2118d
UUCCUGAUGCCUCCCAUGCCUA
>zma-miR2275a-5p
AGAGUUGGAGGAAAGCAAACC
>zma-miR2275a-3p
UUUGUUUUCCUCCAAUAUCUCA
>zma-miR2275b-5p
AGGAUUAGAGGCAACUGAACC
>zma-miR2275b-3p
UUCAGUUUCCUCUAAUAUCUCA
>zma-miR319a-5p
GAGCUCUCUUCAGUCCACUC
>zma-miR319a-3p
UUGGACUGAAGGGUGCUCCC
>zma-miR319b-5p
AGAGCGUCCUUCAGUCCACUC
>zma-miR390a-5p
AAGCUCAGGAGGGAUAGCGCC
>zma-miR390a-3p
CGCUAUCUAUCCUGAGCUCCA
>zma-miR393a-3p
AUCAGUGCAAUCCCUUUGGAAU
>zma-miR393a-5p
UCCAAAGGGAUCGCAUUGAUCU
>zma-miR393b-5p
UCCAAAGGGAUCGCAUUGAUCC
>zma-miR393b-3p
AUCAAUGCGAUCCUUUUGGAGG
>zma-miR393c-3p
GUCAGUGCAAUCCCUUUGGAAU
>zma-miR394a-5p
UUGGCAUUCUGUCCACCUCC
>zma-miR395a-5p
GUUCUCCUCAAACCACUUCAGUU
>zma-miR395b-5p
GUUCCCUACAAGCACUUCACAA
>zma-miR395b-3p
GUGAAGUGUUUGGGGGAACUC
>zma-miR395c-5p
GUUCCCUGCAAACACUUCACCA
>zma-miR395c-3p
GUGAAGUGUUUGGAGGAACUC
>zma-miR395e-5p
GUUCCCUUCAAGCACUUCACAU
>zma-miR395i-5p
GUUCCCUACAAGCACUUCACGA
>zma-miR395n-5p
GUUCUCUACAAGCACUUCACGA
>zma-miR396b-5p
UUCCACAGCUUUCUUGAACUG
>zma-miR396b-3p
GUUCAAUAAAGCUGUGGGAAA
>zma-miR396c
UUCCACAGGCUUUCUUGAACUG
>zma-miR396e-5p
UUCCACAGCUUUCUUGAACUU
>zma-miR396f-3p
GGUCAAGAAAGCUGUGGGAAG
>zma-miR396g-5p
UCCCACAGCUUUAUUGAACUG
>zma-miR396g-3p
GUUCAAGAAAGCUGUGGAAGA
>zma-miR397a-5p
UCAUUGAGCGCAGCGUUGAUG
>zma-miR397b-3p
CCAGCGCUGCACUCAAUUACG
>zma-miR398a-5p
GGGGCGAACUGAGAACACAUG
>zma-miR398a-3p
UGUGUUCUCAGGUCGCCCCCG
>zma-miR398b-5p
GGGGCGGACUGGGAACACAUG
>zma-miR399a-3p
UGCCAAAGGAGAAUUGCCCUG
>zma-miR399d-3p
UGCCAAAGGAGAGCUGCCCUG
>zma-miR399e-3p
UGCCAAAGGAGAGUUGCCCUG
>zma-miR399f-5p
GGGCAACUUCUCCUUUGGCAGA
>zma-miR399j-5p
AGGCAGCUCUCCUCUGGCAGG
>zma-miR408a
CUGCACUGCCUCUUCCCUGGC
>zma-miR408b-5p
CAGGGACGAGGCAGAGCAUGG
>zma-miR444a
UGCAGUUGUUGUCUCAAGCUU
>zma-miR528a-5p
UGGAAGGGGCAUGCAGAGGAG
>zma-miR528a-3p
CCUGUGCCUGCCUCUUCCAUU
>zma-miR529-5p
AGAAGAGAGAGAGUACAGCCU
>zma-miR827-3p
UUAGAUGACCAUCAGCAAACA
>zma-miR827-5p
UUUGUUGGUGGUCAUUUAACC
