# Supplementary material for: Transcriptomic and Genome-wide Association Study Reveal Long Noncoding RNAs&nbsp;Responding to Nitrogen Deficiency in Maize
Source: Research Square preprint supplement (doi:10.21203/rs.3.rs-104831/v1), 2020-11-13
Supplement: Supplementary file 7 [file f860ddcff943c1e5cbc85ed1.xlsx]

## Sheet: Sheet1
Supporitng Table 4. LncRNA-mRNA pairs of trans-acting

## Sheet: L_lncRNA-mRNA
lncRNA_id	gene_id
LNC_006179	Zm00001d054093
LNC_006178	Zm00001d054093
LNC_006152	Zm00001d054093
LNC_006137	Zm00001d054093
LNC_006129	Zm00001d054093
LNC_006127	Zm00001d054093
LNC_006118	Zm00001d054093
LNC_006043	Zm00001d054093
LNC_006010	Zm00001d054093
LNC_005750	Zm00001d054093
LNC_005695	Zm00001d054093
LNC_005637	Zm00001d054093
LNC_005569	Zm00001d054093
LNC_005420	Zm00001d054093
LNC_005368	Zm00001d054093
LNC_005354	Zm00001d054093
LNC_005287	Zm00001d054093
LNC_005212	Zm00001d054093
LNC_005058	Zm00001d054093
LNC_004991	Zm00001d054093
LNC_004950	Zm00001d054093
LNC_004932	Zm00001d054093
LNC_004900	Zm00001d054093
LNC_004854	Zm00001d054093
LNC_004754	Zm00001d054093
LNC_004707	Zm00001d054093
LNC_004594	Zm00001d054093
LNC_004554	Zm00001d054093
LNC_004429	Zm00001d054093
LNC_004363	Zm00001d054093
LNC_004229	Zm00001d054093
LNC_004158	Zm00001d054093
LNC_003970	Zm00001d054093
LNC_003937	Zm00001d054093
LNC_003790	Zm00001d054093
LNC_003769	Zm00001d054093
LNC_003768	Zm00001d054093
LNC_003724	Zm00001d054093
LNC_003690	Zm00001d054093
LNC_003623	Zm00001d054093
LNC_003426	Zm00001d054093
LNC_003404	Zm00001d054093
LNC_003272	Zm00001d054093
LNC_003264	Zm00001d054093
LNC_003248	Zm00001d054093
LNC_003233	Zm00001d054093
LNC_003178	Zm00001d054093
LNC_003109	Zm00001d054093
LNC_002949	Zm00001d054093
LNC_002930	Zm00001d054093
LNC_002874	Zm00001d054093
LNC_002731	Zm00001d054093
LNC_002561	Zm00001d054093
LNC_002526	Zm00001d054093
LNC_002440	Zm00001d054093
LNC_002369	Zm00001d054093
LNC_002317	Zm00001d054093
LNC_002227	Zm00001d054093
LNC_002202	Zm00001d054093
LNC_002190	Zm00001d054093
LNC_001952	Zm00001d054093
LNC_001937	Zm00001d054093
LNC_001933	Zm00001d054093
LNC_001920	Zm00001d054093
LNC_001573	Zm00001d054093
LNC_001548	Zm00001d054093
LNC_001535	Zm00001d054093
LNC_001460	Zm00001d054093
LNC_001425	Zm00001d054093
LNC_001418	Zm00001d054093
LNC_001411	Zm00001d054093
LNC_001264	Zm00001d054093
LNC_001248	Zm00001d054093
LNC_001238	Zm00001d054093
LNC_001183	Zm00001d054093
LNC_001030	Zm00001d054093
LNC_000937	Zm00001d054093
LNC_000920	Zm00001d054093
LNC_000843	Zm00001d054093
LNC_000654	Zm00001d054093
LNC_000612	Zm00001d054093
LNC_000608	Zm00001d054093
LNC_000574	Zm00001d054093
LNC_000569	Zm00001d054093
LNC_000491	Zm00001d054093
LNC_000430	Zm00001d054093
LNC_000316	Zm00001d054093
LNC_000192	Zm00001d054093
LNC_006179	Zm00001d054087
LNC_006178	Zm00001d054087
LNC_006129	Zm00001d054087
LNC_006029	Zm00001d054087
LNC_005750	Zm00001d054087
LNC_005636	Zm00001d054087
LNC_005420	Zm00001d054087
LNC_005368	Zm00001d054087
LNC_003556	Zm00001d054087
LNC_003462	Zm00001d054087
LNC_003272	Zm00001d054087
LNC_003205	Zm00001d054087
LNC_002907	Zm00001d054087
LNC_002861	Zm00001d054087
LNC_002241	Zm00001d054087
LNC_002202	Zm00001d054087
LNC_001937	Zm00001d054087
LNC_001418	Zm00001d054087
LNC_001264	Zm00001d054087
LNC_000738	Zm00001d054087
LNC_000316	Zm00001d054087
LNC_005354	Zm00001d054079
LNC_004922	Zm00001d054079
LNC_004854	Zm00001d054079
LNC_003242	Zm00001d054079
LNC_002907	Zm00001d054079
LNC_002568	Zm00001d054079
LNC_002314	Zm00001d054079
LNC_002241	Zm00001d054079
LNC_001937	Zm00001d054079
LNC_001900	Zm00001d054079
LNC_001873	Zm00001d054079
LNC_001576	Zm00001d054079
LNC_001411	Zm00001d054079
LNC_001264	Zm00001d054079
LNC_000738	Zm00001d054079
LNC_000316	Zm00001d054079
LNC_006152	Zm00001d054067
LNC_006064	Zm00001d054067
LNC_005839	Zm00001d054067
LNC_005637	Zm00001d054067
LNC_005354	Zm00001d054067
LNC_005212	Zm00001d054067
LNC_005011	Zm00001d054067
LNC_004950	Zm00001d054067
LNC_004922	Zm00001d054067
LNC_004900	Zm00001d054067
LNC_004854	Zm00001d054067
LNC_004707	Zm00001d054067
LNC_004594	Zm00001d054067
LNC_004554	Zm00001d054067
LNC_004429	Zm00001d054067
LNC_004229	Zm00001d054067
LNC_004218	Zm00001d054067
LNC_003790	Zm00001d054067
LNC_003769	Zm00001d054067
LNC_003768	Zm00001d054067
LNC_003724	Zm00001d054067
LNC_003690	Zm00001d054067
LNC_003623	Zm00001d054067
LNC_003455	Zm00001d054067
LNC_003272	Zm00001d054067
LNC_003264	Zm00001d054067
LNC_003248	Zm00001d054067
LNC_003242	Zm00001d054067
LNC_003109	Zm00001d054067
LNC_002941	Zm00001d054067
LNC_002930	Zm00001d054067
LNC_002923	Zm00001d054067
LNC_002907	Zm00001d054067
LNC_002731	Zm00001d054067
LNC_002369	Zm00001d054067
LNC_002317	Zm00001d054067
LNC_002314	Zm00001d054067
LNC_001937	Zm00001d054067
LNC_001933	Zm00001d054067
LNC_001920	Zm00001d054067
LNC_001900	Zm00001d054067
LNC_001873	Zm00001d054067
LNC_001792	Zm00001d054067
LNC_001685	Zm00001d054067
LNC_001577	Zm00001d054067
LNC_001576	Zm00001d054067
LNC_001460	Zm00001d054067
LNC_001425	Zm00001d054067
LNC_001411	Zm00001d054067
LNC_001264	Zm00001d054067
LNC_001248	Zm00001d054067
LNC_001183	Zm00001d054067
LNC_000937	Zm00001d054067
LNC_000920	Zm00001d054067
LNC_000738	Zm00001d054067
LNC_000608	Zm00001d054067
LNC_000574	Zm00001d054067
LNC_000491	Zm00001d054067
LNC_000316	Zm00001d054067
LNC_002700	Zm00001d054066
LNC_001948	Zm00001d054066
LNC_005354	Zm00001d054062
LNC_005212	Zm00001d054062
LNC_004922	Zm00001d054062
LNC_004900	Zm00001d054062
LNC_004854	Zm00001d054062
LNC_004429	Zm00001d054062
LNC_003803	Zm00001d054062
LNC_003724	Zm00001d054062
LNC_003242	Zm00001d054062
LNC_002914	Zm00001d054062
LNC_002874	Zm00001d054062
LNC_002568	Zm00001d054062
LNC_002314	Zm00001d054062
LNC_001937	Zm00001d054062
LNC_001933	Zm00001d054062
LNC_001920	Zm00001d054062
LNC_001873	Zm00001d054062
LNC_001577	Zm00001d054062
LNC_001576	Zm00001d054062
LNC_001460	Zm00001d054062
LNC_001411	Zm00001d054062
LNC_000937	Zm00001d054062
LNC_000738	Zm00001d054062
LNC_000574	Zm00001d054062
LNC_001003	Zm00001d054044
LNC_006179	Zm00001d054015
LNC_006178	Zm00001d054015
LNC_006118	Zm00001d054015
LNC_006064	Zm00001d054015
LNC_006029	Zm00001d054015
LNC_006010	Zm00001d054015
LNC_005863	Zm00001d054015
LNC_005788	Zm00001d054015
LNC_005750	Zm00001d054015
LNC_005695	Zm00001d054015
LNC_005637	Zm00001d054015
LNC_005636	Zm00001d054015
LNC_005586	Zm00001d054015
LNC_005569	Zm00001d054015
LNC_005420	Zm00001d054015
LNC_005368	Zm00001d054015
LNC_005354	Zm00001d054015
LNC_005177	Zm00001d054015
LNC_005079	Zm00001d054015
LNC_005058	Zm00001d054015
LNC_004900	Zm00001d054015
LNC_004871	Zm00001d054015
LNC_004714	Zm00001d054015
LNC_004594	Zm00001d054015
LNC_004363	Zm00001d054015
LNC_004218	Zm00001d054015
LNC_003970	Zm00001d054015
LNC_003937	Zm00001d054015
LNC_003769	Zm00001d054015
LNC_003768	Zm00001d054015
LNC_003623	Zm00001d054015
LNC_003556	Zm00001d054015
LNC_003426	Zm00001d054015
LNC_003404	Zm00001d054015
LNC_003272	Zm00001d054015
LNC_003233	Zm00001d054015
LNC_003178	Zm00001d054015
LNC_002949	Zm00001d054015
LNC_002930	Zm00001d054015
LNC_002609	Zm00001d054015
LNC_002502	Zm00001d054015
LNC_002440	Zm00001d054015
LNC_002317	Zm00001d054015
LNC_002227	Zm00001d054015
LNC_002202	Zm00001d054015
LNC_002190	Zm00001d054015
LNC_001937	Zm00001d054015
LNC_001916	Zm00001d054015
LNC_001705	Zm00001d054015
LNC_001704	Zm00001d054015
LNC_001647	Zm00001d054015
LNC_001578	Zm00001d054015
LNC_001535	Zm00001d054015
LNC_001418	Zm00001d054015
LNC_001411	Zm00001d054015
LNC_001264	Zm00001d054015
LNC_001248	Zm00001d054015
LNC_001186	Zm00001d054015
LNC_001030	Zm00001d054015
LNC_000937	Zm00001d054015
LNC_000654	Zm00001d054015
LNC_000608	Zm00001d054015
LNC_000316	Zm00001d054015
LNC_000192	Zm00001d054015
LNC_000159	Zm00001d054015
LNC_006179	Zm00001d054006
LNC_006178	Zm00001d054006
LNC_006129	Zm00001d054006
LNC_005420	Zm00001d054006
LNC_005368	Zm00001d054006
LNC_004932	Zm00001d054006
LNC_004922	Zm00001d054006
LNC_003556	Zm00001d054006
LNC_003404	Zm00001d054006
LNC_003272	Zm00001d054006
LNC_002907	Zm00001d054006
LNC_002861	Zm00001d054006
LNC_002568	Zm00001d054006
LNC_002440	Zm00001d054006
LNC_002241	Zm00001d054006
LNC_001937	Zm00001d054006
LNC_001576	Zm00001d054006
LNC_001418	Zm00001d054006
LNC_001264	Zm00001d054006
LNC_000738	Zm00001d054006
LNC_000430	Zm00001d054006
LNC_000316	Zm00001d054006
LNC_000192	Zm00001d054006
LNC_002887	Zm00001d054000
LNC_005788	Zm00001d053986
LNC_003318	Zm00001d053986
LNC_001647	Zm00001d053986
LNC_001186	Zm00001d053986
LNC_000181	Zm00001d053986
LNC_006179	Zm00001d053978
LNC_006178	Zm00001d053978
LNC_006129	Zm00001d053978
LNC_006118	Zm00001d053978
LNC_006064	Zm00001d053978
LNC_006029	Zm00001d053978
LNC_006010	Zm00001d053978
LNC_005863	Zm00001d053978
LNC_005779	Zm00001d053978
LNC_005750	Zm00001d053978
LNC_005695	Zm00001d053978
LNC_005637	Zm00001d053978
LNC_005636	Zm00001d053978
LNC_005569	Zm00001d053978
LNC_005420	Zm00001d053978
LNC_005368	Zm00001d053978
LNC_005354	Zm00001d053978
LNC_005177	Zm00001d053978
LNC_005079	Zm00001d053978
LNC_005058	Zm00001d053978
LNC_004932	Zm00001d053978
LNC_004922	Zm00001d053978
LNC_004900	Zm00001d053978
LNC_004594	Zm00001d053978
LNC_004363	Zm00001d053978
LNC_004218	Zm00001d053978
LNC_003970	Zm00001d053978
LNC_003937	Zm00001d053978
LNC_003769	Zm00001d053978
LNC_003768	Zm00001d053978
LNC_003623	Zm00001d053978
LNC_003556	Zm00001d053978
LNC_003455	Zm00001d053978
LNC_003426	Zm00001d053978
LNC_003404	Zm00001d053978
LNC_003272	Zm00001d053978
LNC_003233	Zm00001d053978
LNC_003205	Zm00001d053978
LNC_002949	Zm00001d053978
LNC_002907	Zm00001d053978
LNC_002861	Zm00001d053978
LNC_002609	Zm00001d053978
LNC_002568	Zm00001d053978
LNC_002440	Zm00001d053978
LNC_002317	Zm00001d053978
LNC_002241	Zm00001d053978
LNC_002227	Zm00001d053978
LNC_002202	Zm00001d053978
LNC_002190	Zm00001d053978
LNC_001937	Zm00001d053978
LNC_001933	Zm00001d053978
LNC_001900	Zm00001d053978
LNC_001685	Zm00001d053978
LNC_001647	Zm00001d053978
LNC_001576	Zm00001d053978
LNC_001545	Zm00001d053978
LNC_001535	Zm00001d053978
LNC_001418	Zm00001d053978
LNC_001411	Zm00001d053978
LNC_001264	Zm00001d053978
LNC_001248	Zm00001d053978
LNC_001186	Zm00001d053978
LNC_001030	Zm00001d053978
LNC_000937	Zm00001d053978
LNC_000738	Zm00001d053978
LNC_000654	Zm00001d053978
LNC_000430	Zm00001d053978
LNC_000316	Zm00001d053978
LNC_000192	Zm00001d053978
LNC_006179	Zm00001d053974
LNC_006178	Zm00001d053974
LNC_006129	Zm00001d053974
LNC_006118	Zm00001d053974
LNC_006064	Zm00001d053974
LNC_006029	Zm00001d053974
LNC_005863	Zm00001d053974
LNC_005750	Zm00001d053974
LNC_005695	Zm00001d053974
LNC_005637	Zm00001d053974
LNC_005636	Zm00001d053974
LNC_005586	Zm00001d053974
LNC_005569	Zm00001d053974
LNC_005420	Zm00001d053974
LNC_005368	Zm00001d053974
LNC_005177	Zm00001d053974
LNC_005079	Zm00001d053974
LNC_005058	Zm00001d053974
LNC_004932	Zm00001d053974
LNC_004900	Zm00001d053974
LNC_004834	Zm00001d053974
LNC_004714	Zm00001d053974
LNC_004363	Zm00001d053974
LNC_004218	Zm00001d053974
LNC_003970	Zm00001d053974
LNC_003937	Zm00001d053974
LNC_003769	Zm00001d053974
LNC_003556	Zm00001d053974
LNC_003462	Zm00001d053974
LNC_003426	Zm00001d053974
LNC_003404	Zm00001d053974
LNC_003272	Zm00001d053974
LNC_003233	Zm00001d053974
LNC_003205	Zm00001d053974
LNC_002949	Zm00001d053974
LNC_002907	Zm00001d053974
LNC_002861	Zm00001d053974
LNC_002609	Zm00001d053974
LNC_002440	Zm00001d053974
LNC_002317	Zm00001d053974
LNC_002241	Zm00001d053974
LNC_002227	Zm00001d053974
LNC_002202	Zm00001d053974
LNC_002190	Zm00001d053974
LNC_001647	Zm00001d053974
LNC_001576	Zm00001d053974
LNC_001535	Zm00001d053974
LNC_001418	Zm00001d053974
LNC_001411	Zm00001d053974
LNC_001264	Zm00001d053974
LNC_001186	Zm00001d053974
LNC_001030	Zm00001d053974
LNC_000654	Zm00001d053974
LNC_000430	Zm00001d053974
LNC_000316	Zm00001d053974
LNC_000192	Zm00001d053974
LNC_005015	Zm00001d053960
LNC_000844	Zm00001d053960
LNC_000647	Zm00001d053960
LNC_005973	Zm00001d053925
LNC_005972	Zm00001d053925
LNC_005679	Zm00001d053925
LNC_004944	Zm00001d053925
LNC_004918	Zm00001d053925
LNC_004916	Zm00001d053925
LNC_004685	Zm00001d053925
LNC_004565	Zm00001d053925
LNC_003893	Zm00001d053925
LNC_003650	Zm00001d053925
LNC_003538	Zm00001d053925
LNC_003346	Zm00001d053925
LNC_003219	Zm00001d053925
LNC_003189	Zm00001d053925
LNC_002398	Zm00001d053925
LNC_002178	Zm00001d053925
LNC_002156	Zm00001d053925
LNC_002092	Zm00001d053925
LNC_001939	Zm00001d053925
LNC_001901	Zm00001d053925
LNC_001823	Zm00001d053925
LNC_001509	Zm00001d053925
LNC_001488	Zm00001d053925
LNC_001190	Zm00001d053925
LNC_001045	Zm00001d053925
LNC_000947	Zm00001d053925
LNC_000940	Zm00001d053925
LNC_000427	Zm00001d053925
LNC_000206	Zm00001d053925
LNC_006179	Zm00001d053916
LNC_006178	Zm00001d053916
LNC_006129	Zm00001d053916
LNC_006064	Zm00001d053916
LNC_006029	Zm00001d053916
LNC_006010	Zm00001d053916
LNC_005863	Zm00001d053916
LNC_005750	Zm00001d053916
LNC_005637	Zm00001d053916
LNC_005636	Zm00001d053916
LNC_005569	Zm00001d053916
LNC_005420	Zm00001d053916
LNC_005368	Zm00001d053916
LNC_005354	Zm00001d053916
LNC_005058	Zm00001d053916
LNC_004950	Zm00001d053916
LNC_004932	Zm00001d053916
LNC_004922	Zm00001d053916
LNC_004900	Zm00001d053916
LNC_004854	Zm00001d053916
LNC_004707	Zm00001d053916
LNC_004594	Zm00001d053916
LNC_004429	Zm00001d053916
LNC_004363	Zm00001d053916
LNC_004218	Zm00001d053916
LNC_004158	Zm00001d053916
LNC_003970	Zm00001d053916
LNC_003937	Zm00001d053916
LNC_003769	Zm00001d053916
LNC_003768	Zm00001d053916
LNC_003724	Zm00001d053916
LNC_003623	Zm00001d053916
LNC_003556	Zm00001d053916
LNC_003462	Zm00001d053916
LNC_003426	Zm00001d053916
LNC_003404	Zm00001d053916
LNC_003272	Zm00001d053916
LNC_003264	Zm00001d053916
LNC_003233	Zm00001d053916
LNC_003109	Zm00001d053916
LNC_002949	Zm00001d053916
LNC_002907	Zm00001d053916
LNC_002861	Zm00001d053916
LNC_002568	Zm00001d053916
LNC_002440	Zm00001d053916
LNC_002317	Zm00001d053916
LNC_002241	Zm00001d053916
LNC_002227	Zm00001d053916
LNC_002202	Zm00001d053916
LNC_002190	Zm00001d053916
LNC_001937	Zm00001d053916
LNC_001933	Zm00001d053916
LNC_001900	Zm00001d053916
LNC_001873	Zm00001d053916
LNC_001576	Zm00001d053916
LNC_001535	Zm00001d053916
LNC_001460	Zm00001d053916
LNC_001425	Zm00001d053916
LNC_001418	Zm00001d053916
LNC_001411	Zm00001d053916
LNC_001264	Zm00001d053916
LNC_001248	Zm00001d053916
LNC_001183	Zm00001d053916
LNC_001030	Zm00001d053916
LNC_000937	Zm00001d053916
LNC_000920	Zm00001d053916
LNC_000738	Zm00001d053916
LNC_000654	Zm00001d053916
LNC_000612	Zm00001d053916
LNC_000608	Zm00001d053916
LNC_000430	Zm00001d053916
LNC_000316	Zm00001d053916
LNC_000192	Zm00001d053916
LNC_005839	Zm00001d053911
LNC_005354	Zm00001d053911
LNC_005212	Zm00001d053911
LNC_004922	Zm00001d053911
LNC_004900	Zm00001d053911
LNC_004429	Zm00001d053911
LNC_003803	Zm00001d053911
LNC_003724	Zm00001d053911
LNC_003455	Zm00001d053911
LNC_003242	Zm00001d053911
LNC_002914	Zm00001d053911
LNC_002568	Zm00001d053911
LNC_002314	Zm00001d053911
LNC_001933	Zm00001d053911
LNC_001873	Zm00001d053911
LNC_001577	Zm00001d053911
LNC_001460	Zm00001d053911
LNC_000937	Zm00001d053911
LNC_000574	Zm00001d053911
LNC_000844	Zm00001d053900
LNC_006179	Zm00001d053880
LNC_006178	Zm00001d053880
LNC_006129	Zm00001d053880
LNC_006118	Zm00001d053880
LNC_006029	Zm00001d053880
LNC_005863	Zm00001d053880
LNC_005750	Zm00001d053880
LNC_005637	Zm00001d053880
LNC_005569	Zm00001d053880
LNC_005420	Zm00001d053880
LNC_005368	Zm00001d053880
LNC_005058	Zm00001d053880
LNC_004932	Zm00001d053880
LNC_004714	Zm00001d053880
LNC_004363	Zm00001d053880
LNC_004347	Zm00001d053880
LNC_003970	Zm00001d053880
LNC_003937	Zm00001d053880
LNC_003556	Zm00001d053880
LNC_003426	Zm00001d053880
LNC_003404	Zm00001d053880
LNC_003272	Zm00001d053880
LNC_003233	Zm00001d053880
LNC_002949	Zm00001d053880
LNC_002861	Zm00001d053880
LNC_002440	Zm00001d053880
LNC_002241	Zm00001d053880
LNC_002227	Zm00001d053880
LNC_002202	Zm00001d053880
LNC_002190	Zm00001d053880
LNC_001535	Zm00001d053880
LNC_001418	Zm00001d053880
LNC_001264	Zm00001d053880
LNC_001030	Zm00001d053880
LNC_000654	Zm00001d053880
LNC_000430	Zm00001d053880
LNC_000192	Zm00001d053880
LNC_006179	Zm00001d053868
LNC_006178	Zm00001d053868
LNC_006129	Zm00001d053868
LNC_006064	Zm00001d053868
LNC_006029	Zm00001d053868
LNC_005750	Zm00001d053868
LNC_005637	Zm00001d053868
LNC_005636	Zm00001d053868
LNC_005420	Zm00001d053868
LNC_005368	Zm00001d053868
LNC_005354	Zm00001d053868
LNC_005058	Zm00001d053868
LNC_004932	Zm00001d053868
LNC_004922	Zm00001d053868
LNC_004900	Zm00001d053868
LNC_004594	Zm00001d053868
LNC_004363	Zm00001d053868
LNC_004218	Zm00001d053868
LNC_003970	Zm00001d053868
LNC_003937	Zm00001d053868
LNC_003769	Zm00001d053868
LNC_003556	Zm00001d053868
LNC_003462	Zm00001d053868
LNC_003404	Zm00001d053868
LNC_003272	Zm00001d053868
LNC_003242	Zm00001d053868
LNC_003233	Zm00001d053868
LNC_003205	Zm00001d053868
LNC_002949	Zm00001d053868
LNC_002907	Zm00001d053868
LNC_002861	Zm00001d053868
LNC_002568	Zm00001d053868
LNC_002440	Zm00001d053868
LNC_002317	Zm00001d053868
LNC_002241	Zm00001d053868
LNC_002227	Zm00001d053868
LNC_002202	Zm00001d053868
LNC_002190	Zm00001d053868
LNC_001937	Zm00001d053868
LNC_001900	Zm00001d053868
LNC_001576	Zm00001d053868
LNC_001535	Zm00001d053868
LNC_001418	Zm00001d053868
LNC_001411	Zm00001d053868
LNC_001264	Zm00001d053868
LNC_000937	Zm00001d053868
LNC_000738	Zm00001d053868
LNC_000430	Zm00001d053868
LNC_000316	Zm00001d053868
LNC_000192	Zm00001d053868
LNC_004024	Zm00001d053843
LNC_002609	Zm00001d053843
LNC_006179	Zm00001d053807
LNC_006178	Zm00001d053807
LNC_006129	Zm00001d053807
LNC_006064	Zm00001d053807
LNC_005750	Zm00001d053807
LNC_005637	Zm00001d053807
LNC_005636	Zm00001d053807
LNC_005420	Zm00001d053807
LNC_005354	Zm00001d053807
LNC_005215	Zm00001d053807
LNC_005058	Zm00001d053807
LNC_004922	Zm00001d053807
LNC_004900	Zm00001d053807
LNC_004854	Zm00001d053807
LNC_004594	Zm00001d053807
LNC_004429	Zm00001d053807
LNC_004218	Zm00001d053807
LNC_003803	Zm00001d053807
LNC_003769	Zm00001d053807
LNC_003724	Zm00001d053807
LNC_003556	Zm00001d053807
LNC_003455	Zm00001d053807
LNC_003404	Zm00001d053807
LNC_003272	Zm00001d053807
LNC_003242	Zm00001d053807
LNC_002907	Zm00001d053807
LNC_002861	Zm00001d053807
LNC_002860	Zm00001d053807
LNC_002568	Zm00001d053807
LNC_002440	Zm00001d053807
LNC_002317	Zm00001d053807
LNC_002314	Zm00001d053807
LNC_002241	Zm00001d053807
LNC_001937	Zm00001d053807
LNC_001933	Zm00001d053807
LNC_001900	Zm00001d053807
LNC_001873	Zm00001d053807
LNC_001577	Zm00001d053807
LNC_001576	Zm00001d053807
LNC_001460	Zm00001d053807
LNC_001411	Zm00001d053807
LNC_001264	Zm00001d053807
LNC_000937	Zm00001d053807
LNC_000738	Zm00001d053807
LNC_000430	Zm00001d053807
LNC_000316	Zm00001d053807
LNC_006179	Zm00001d053805
LNC_006178	Zm00001d053805
LNC_006029	Zm00001d053805
LNC_005949	Zm00001d053805
LNC_005788	Zm00001d053805
LNC_005695	Zm00001d053805
LNC_005636	Zm00001d053805
LNC_004540	Zm00001d053805
LNC_004363	Zm00001d053805
LNC_003556	Zm00001d053805
LNC_003462	Zm00001d053805
LNC_003103	Zm00001d053805
LNC_003004	Zm00001d053805
LNC_002648	Zm00001d053805
LNC_002116	Zm00001d053805
LNC_001647	Zm00001d053805
LNC_001186	Zm00001d053805
LNC_001090	Zm00001d053805
LNC_000181	Zm00001d053805
LNC_006179	Zm00001d053801
LNC_006178	Zm00001d053801
LNC_006064	Zm00001d053801
LNC_006029	Zm00001d053801
LNC_005637	Zm00001d053801
LNC_005636	Zm00001d053801
LNC_005368	Zm00001d053801
LNC_005354	Zm00001d053801
LNC_004363	Zm00001d053801
LNC_004218	Zm00001d053801
LNC_003556	Zm00001d053801
LNC_003462	Zm00001d053801
LNC_003272	Zm00001d053801
LNC_002907	Zm00001d053801
LNC_002861	Zm00001d053801
LNC_002440	Zm00001d053801
LNC_002317	Zm00001d053801
LNC_001411	Zm00001d053801
LNC_001264	Zm00001d053801
LNC_000738	Zm00001d053801
LNC_000316	Zm00001d053801
LNC_006179	Zm00001d053782
LNC_006178	Zm00001d053782
LNC_006129	Zm00001d053782
LNC_006064	Zm00001d053782
LNC_005636	Zm00001d053782
LNC_005420	Zm00001d053782
LNC_005368	Zm00001d053782
LNC_005354	Zm00001d053782
LNC_004932	Zm00001d053782
LNC_004925	Zm00001d053782
LNC_004922	Zm00001d053782
LNC_004900	Zm00001d053782
LNC_004594	Zm00001d053782
LNC_004218	Zm00001d053782
LNC_003803	Zm00001d053782
LNC_003556	Zm00001d053782
LNC_003462	Zm00001d053782
LNC_003404	Zm00001d053782
LNC_003272	Zm00001d053782
LNC_003242	Zm00001d053782
LNC_002907	Zm00001d053782
LNC_002861	Zm00001d053782
LNC_002568	Zm00001d053782
LNC_002440	Zm00001d053782
LNC_002241	Zm00001d053782
LNC_001937	Zm00001d053782
LNC_001900	Zm00001d053782
LNC_001873	Zm00001d053782
LNC_001576	Zm00001d053782
LNC_001418	Zm00001d053782
LNC_001411	Zm00001d053782
LNC_001264	Zm00001d053782
LNC_000738	Zm00001d053782
LNC_000430	Zm00001d053782
LNC_000316	Zm00001d053782
LNC_000805	Zm00001d053778
LNC_004335	Zm00001d053776
LNC_002488	Zm00001d053776
LNC_000058	Zm00001d053776
LNC_006179	Zm00001d053743
LNC_006178	Zm00001d053743
LNC_006129	Zm00001d053743
LNC_006064	Zm00001d053743
LNC_006029	Zm00001d053743
LNC_005750	Zm00001d053743
LNC_005636	Zm00001d053743
LNC_005420	Zm00001d053743
LNC_005368	Zm00001d053743
LNC_005354	Zm00001d053743
LNC_005058	Zm00001d053743
LNC_004932	Zm00001d053743
LNC_004922	Zm00001d053743
LNC_004540	Zm00001d053743
LNC_004429	Zm00001d053743
LNC_004363	Zm00001d053743
LNC_004218	Zm00001d053743
LNC_003970	Zm00001d053743
LNC_003937	Zm00001d053743
LNC_003556	Zm00001d053743
LNC_003462	Zm00001d053743
LNC_003455	Zm00001d053743
LNC_003426	Zm00001d053743
LNC_003404	Zm00001d053743
LNC_003272	Zm00001d053743
LNC_003242	Zm00001d053743
LNC_003233	Zm00001d053743
LNC_003205	Zm00001d053743
LNC_002907	Zm00001d053743
LNC_002861	Zm00001d053743
LNC_002568	Zm00001d053743
LNC_002440	Zm00001d053743
LNC_002317	Zm00001d053743
LNC_002314	Zm00001d053743
LNC_002241	Zm00001d053743
LNC_002227	Zm00001d053743
LNC_002190	Zm00001d053743
LNC_001937	Zm00001d053743
LNC_001900	Zm00001d053743
LNC_001873	Zm00001d053743
LNC_001792	Zm00001d053743
LNC_001577	Zm00001d053743
LNC_001576	Zm00001d053743
LNC_001535	Zm00001d053743
LNC_001418	Zm00001d053743
LNC_001411	Zm00001d053743
LNC_001264	Zm00001d053743
LNC_000738	Zm00001d053743
LNC_000316	Zm00001d053743
LNC_000192	Zm00001d053743
LNC_006112	Zm00001d053725
LNC_002994	Zm00001d053725
LNC_001948	Zm00001d053725
LNC_006179	Zm00001d053713
LNC_006178	Zm00001d053713
LNC_006129	Zm00001d053713
LNC_006064	Zm00001d053713
LNC_006029	Zm00001d053713
LNC_005863	Zm00001d053713
LNC_005750	Zm00001d053713
LNC_005695	Zm00001d053713
LNC_005637	Zm00001d053713
LNC_005636	Zm00001d053713
LNC_005569	Zm00001d053713
LNC_005420	Zm00001d053713
LNC_005368	Zm00001d053713
LNC_005354	Zm00001d053713
LNC_005079	Zm00001d053713
LNC_005058	Zm00001d053713
LNC_004950	Zm00001d053713
LNC_004932	Zm00001d053713
LNC_004900	Zm00001d053713
LNC_004594	Zm00001d053713
LNC_004363	Zm00001d053713
LNC_004218	Zm00001d053713
LNC_003970	Zm00001d053713
LNC_003937	Zm00001d053713
LNC_003769	Zm00001d053713
LNC_003768	Zm00001d053713
LNC_003556	Zm00001d053713
LNC_003462	Zm00001d053713
LNC_003426	Zm00001d053713
LNC_003404	Zm00001d053713
LNC_003272	Zm00001d053713
LNC_003233	Zm00001d053713
LNC_003205	Zm00001d053713
LNC_003109	Zm00001d053713
LNC_002949	Zm00001d053713
LNC_002907	Zm00001d053713
LNC_002861	Zm00001d053713
LNC_002568	Zm00001d053713
LNC_002440	Zm00001d053713
LNC_002317	Zm00001d053713
LNC_002241	Zm00001d053713
LNC_002227	Zm00001d053713
LNC_002202	Zm00001d053713
LNC_002190	Zm00001d053713
LNC_001937	Zm00001d053713
LNC_001900	Zm00001d053713
LNC_001685	Zm00001d053713
LNC_001647	Zm00001d053713
LNC_001576	Zm00001d053713
LNC_001535	Zm00001d053713
LNC_001418	Zm00001d053713
LNC_001411	Zm00001d053713
LNC_001264	Zm00001d053713
LNC_001248	Zm00001d053713
LNC_001030	Zm00001d053713
LNC_000937	Zm00001d053713
LNC_000738	Zm00001d053713
LNC_000654	Zm00001d053713
LNC_000430	Zm00001d053713
LNC_000316	Zm00001d053713
LNC_000192	Zm00001d053713
LNC_003974	Zm00001d053706
LNC_000433	Zm00001d053672
LNC_006179	Zm00001d053652
LNC_006178	Zm00001d053652
LNC_006129	Zm00001d053652
LNC_006064	Zm00001d053652
LNC_006029	Zm00001d053652
LNC_005750	Zm00001d053652
LNC_005695	Zm00001d053652
LNC_005636	Zm00001d053652
LNC_005420	Zm00001d053652
LNC_005368	Zm00001d053652
LNC_005354	Zm00001d053652
LNC_005079	Zm00001d053652
LNC_004594	Zm00001d053652
LNC_004540	Zm00001d053652
LNC_004363	Zm00001d053652
LNC_004218	Zm00001d053652
LNC_003937	Zm00001d053652
LNC_003556	Zm00001d053652
LNC_003462	Zm00001d053652
LNC_003426	Zm00001d053652
LNC_003404	Zm00001d053652
LNC_003272	Zm00001d053652
LNC_003233	Zm00001d053652
LNC_003205	Zm00001d053652
LNC_002907	Zm00001d053652
LNC_002861	Zm00001d053652
LNC_002440	Zm00001d053652
LNC_002317	Zm00001d053652
LNC_002241	Zm00001d053652
LNC_002202	Zm00001d053652
LNC_002190	Zm00001d053652
LNC_001937	Zm00001d053652
LNC_001900	Zm00001d053652
LNC_001685	Zm00001d053652
LNC_001418	Zm00001d053652
LNC_001411	Zm00001d053652
LNC_001264	Zm00001d053652
LNC_000738	Zm00001d053652
LNC_000316	Zm00001d053652
LNC_001900	Zm00001d053640
LNC_001685	Zm00001d053640
LNC_000738	Zm00001d053640
LNC_004944	Zm00001d053626
LNC_004850	Zm00001d053626
LNC_003538	Zm00001d053626
LNC_002499	Zm00001d053626
LNC_001976	Zm00001d053626
LNC_001509	Zm00001d053626
LNC_001215	Zm00001d053626
LNC_000748	Zm00001d053626
LNC_000324	Zm00001d053626
LNC_006152	Zm00001d053568
LNC_006137	Zm00001d053568
LNC_006049	Zm00001d053568
LNC_005863	Zm00001d053568
LNC_005695	Zm00001d053568
LNC_005470	Zm00001d053568
LNC_005177	Zm00001d053568
LNC_005079	Zm00001d053568
LNC_004950	Zm00001d053568
LNC_003983	Zm00001d053568
LNC_003790	Zm00001d053568
LNC_003748	Zm00001d053568
LNC_003623	Zm00001d053568
LNC_003578	Zm00001d053568
LNC_003264	Zm00001d053568
LNC_003230	Zm00001d053568
LNC_003178	Zm00001d053568
LNC_003109	Zm00001d053568
LNC_003004	Zm00001d053568
LNC_002941	Zm00001d053568
LNC_002930	Zm00001d053568
LNC_002909	Zm00001d053568
LNC_002666	Zm00001d053568
LNC_002505	Zm00001d053568
LNC_002502	Zm00001d053568
LNC_002317	Zm00001d053568
LNC_001916	Zm00001d053568
LNC_001785	Zm00001d053568
LNC_001705	Zm00001d053568
LNC_001704	Zm00001d053568
LNC_001614	Zm00001d053568
LNC_000671	Zm00001d053568
LNC_000613	Zm00001d053568
LNC_000608	Zm00001d053568
LNC_000064	Zm00001d053568
LNC_000047	Zm00001d053568
LNC_005497	Zm00001d053554
LNC_002793	Zm00001d053554
LNC_002358	Zm00001d053554
LNC_001188	Zm00001d053554
LNC_000231	Zm00001d053554
LNC_000228	Zm00001d053554
LNC_006179	Zm00001d053545
LNC_006178	Zm00001d053545
LNC_006137	Zm00001d053545
LNC_006129	Zm00001d053545
LNC_006064	Zm00001d053545
LNC_006049	Zm00001d053545
LNC_006030	Zm00001d053545
LNC_006029	Zm00001d053545
LNC_005750	Zm00001d053545
LNC_005695	Zm00001d053545
LNC_005637	Zm00001d053545
LNC_005636	Zm00001d053545
LNC_005569	Zm00001d053545
LNC_005420	Zm00001d053545
LNC_005368	Zm00001d053545
LNC_005354	Zm00001d053545
LNC_005215	Zm00001d053545
LNC_005079	Zm00001d053545
LNC_005058	Zm00001d053545
LNC_004991	Zm00001d053545
LNC_004950	Zm00001d053545
LNC_004922	Zm00001d053545
LNC_004900	Zm00001d053545
LNC_004871	Zm00001d053545
LNC_004854	Zm00001d053545
LNC_004754	Zm00001d053545
LNC_004594	Zm00001d053545
LNC_004429	Zm00001d053545
LNC_004363	Zm00001d053545
LNC_004218	Zm00001d053545
LNC_003790	Zm00001d053545
LNC_003769	Zm00001d053545
LNC_003768	Zm00001d053545
LNC_003748	Zm00001d053545
LNC_003724	Zm00001d053545
LNC_003578	Zm00001d053545
LNC_003556	Zm00001d053545
LNC_003462	Zm00001d053545
LNC_003455	Zm00001d053545
LNC_003404	Zm00001d053545
LNC_003272	Zm00001d053545
LNC_003242	Zm00001d053545
LNC_003233	Zm00001d053545
LNC_003178	Zm00001d053545
LNC_003109	Zm00001d053545
LNC_002930	Zm00001d053545
LNC_002909	Zm00001d053545
LNC_002907	Zm00001d053545
LNC_002861	Zm00001d053545
LNC_002666	Zm00001d053545
LNC_002568	Zm00001d053545
LNC_002561	Zm00001d053545
LNC_002502	Zm00001d053545
LNC_002440	Zm00001d053545
LNC_002317	Zm00001d053545
LNC_002314	Zm00001d053545
LNC_002241	Zm00001d053545
LNC_002202	Zm00001d053545
LNC_002190	Zm00001d053545
LNC_001937	Zm00001d053545
LNC_001933	Zm00001d053545
LNC_001900	Zm00001d053545
LNC_001873	Zm00001d053545
LNC_001685	Zm00001d053545
LNC_001577	Zm00001d053545
LNC_001576	Zm00001d053545
LNC_001573	Zm00001d053545
LNC_001535	Zm00001d053545
LNC_001460	Zm00001d053545
LNC_001411	Zm00001d053545
LNC_001264	Zm00001d053545
LNC_000937	Zm00001d053545
LNC_000738	Zm00001d053545
LNC_000613	Zm00001d053545
LNC_000608	Zm00001d053545
LNC_000569	Zm00001d053545
LNC_000316	Zm00001d053545
LNC_000047	Zm00001d053545
LNC_003689	Zm00001d053533
LNC_005973	Zm00001d053513
LNC_005972	Zm00001d053513
LNC_005679	Zm00001d053513
LNC_004918	Zm00001d053513
LNC_004916	Zm00001d053513
LNC_004565	Zm00001d053513
LNC_003893	Zm00001d053513
LNC_003650	Zm00001d053513
LNC_003346	Zm00001d053513
LNC_002398	Zm00001d053513
LNC_002208	Zm00001d053513
LNC_002178	Zm00001d053513
LNC_002092	Zm00001d053513
LNC_001939	Zm00001d053513
LNC_001901	Zm00001d053513
LNC_001823	Zm00001d053513
LNC_001488	Zm00001d053513
LNC_001212	Zm00001d053513
LNC_001190	Zm00001d053513
LNC_000947	Zm00001d053513
LNC_000940	Zm00001d053513
LNC_000427	Zm00001d053513
LNC_000257	Zm00001d053513
LNC_006178	Zm00001d053452
LNC_006118	Zm00001d053452
LNC_005863	Zm00001d053452
LNC_005788	Zm00001d053452
LNC_005695	Zm00001d053452
LNC_005586	Zm00001d053452
LNC_005569	Zm00001d053452
LNC_005368	Zm00001d053452
LNC_005177	Zm00001d053452
LNC_005079	Zm00001d053452
LNC_004871	Zm00001d053452
LNC_004714	Zm00001d053452
LNC_004363	Zm00001d053452
LNC_004347	Zm00001d053452
LNC_004024	Zm00001d053452
LNC_003937	Zm00001d053452
LNC_003437	Zm00001d053452
LNC_003426	Zm00001d053452
LNC_003318	Zm00001d053452
LNC_003233	Zm00001d053452
LNC_003004	Zm00001d053452
LNC_002609	Zm00001d053452
LNC_002317	Zm00001d053452
LNC_002227	Zm00001d053452
LNC_002190	Zm00001d053452
LNC_001916	Zm00001d053452
LNC_001704	Zm00001d053452
LNC_001647	Zm00001d053452
LNC_001599	Zm00001d053452
LNC_001578	Zm00001d053452
LNC_001535	Zm00001d053452
LNC_001186	Zm00001d053452
LNC_000654	Zm00001d053452
LNC_000323	Zm00001d053452
LNC_000159	Zm00001d053452
LNC_006064	Zm00001d053446
LNC_006000	Zm00001d053446
LNC_005839	Zm00001d053446
LNC_005637	Zm00001d053446
LNC_005354	Zm00001d053446
LNC_005215	Zm00001d053446
LNC_004900	Zm00001d053446
LNC_004594	Zm00001d053446
LNC_004554	Zm00001d053446
LNC_004429	Zm00001d053446
LNC_004218	Zm00001d053446
LNC_003790	Zm00001d053446
LNC_003769	Zm00001d053446
LNC_003768	Zm00001d053446
LNC_003724	Zm00001d053446
LNC_003690	Zm00001d053446
LNC_003623	Zm00001d053446
LNC_003455	Zm00001d053446
LNC_003264	Zm00001d053446
LNC_003248	Zm00001d053446
LNC_003242	Zm00001d053446
LNC_003230	Zm00001d053446
LNC_003109	Zm00001d053446
LNC_002941	Zm00001d053446
LNC_002930	Zm00001d053446
LNC_002923	Zm00001d053446
LNC_002731	Zm00001d053446
LNC_002505	Zm00001d053446
LNC_002369	Zm00001d053446
LNC_002317	Zm00001d053446
LNC_002314	Zm00001d053446
LNC_002059	Zm00001d053446
LNC_001933	Zm00001d053446
LNC_001900	Zm00001d053446
LNC_001873	Zm00001d053446
LNC_001792	Zm00001d053446
LNC_001705	Zm00001d053446
LNC_001577	Zm00001d053446
LNC_001545	Zm00001d053446
LNC_001460	Zm00001d053446
LNC_001431	Zm00001d053446
LNC_001411	Zm00001d053446
LNC_000937	Zm00001d053446
LNC_000608	Zm00001d053446
LNC_000574	Zm00001d053446
LNC_000491	Zm00001d053446
LNC_000316	Zm00001d053446
LNC_006179	Zm00001d053432
LNC_006178	Zm00001d053432
LNC_006129	Zm00001d053432
LNC_006064	Zm00001d053432
LNC_006029	Zm00001d053432
LNC_005863	Zm00001d053432
LNC_005750	Zm00001d053432
LNC_005695	Zm00001d053432
LNC_005637	Zm00001d053432
LNC_005636	Zm00001d053432
LNC_005569	Zm00001d053432
LNC_005420	Zm00001d053432
LNC_005368	Zm00001d053432
LNC_005354	Zm00001d053432
LNC_005215	Zm00001d053432
LNC_005079	Zm00001d053432
LNC_005058	Zm00001d053432
LNC_004950	Zm00001d053432
LNC_004922	Zm00001d053432
LNC_004900	Zm00001d053432
LNC_004594	Zm00001d053432
LNC_004540	Zm00001d053432
LNC_004363	Zm00001d053432
LNC_004218	Zm00001d053432
LNC_003937	Zm00001d053432
LNC_003769	Zm00001d053432
LNC_003556	Zm00001d053432
LNC_003462	Zm00001d053432
LNC_003455	Zm00001d053432
LNC_003404	Zm00001d053432
LNC_003272	Zm00001d053432
LNC_003242	Zm00001d053432
LNC_003233	Zm00001d053432
LNC_003205	Zm00001d053432
LNC_003109	Zm00001d053432
LNC_002907	Zm00001d053432
LNC_002861	Zm00001d053432
LNC_002568	Zm00001d053432
LNC_002440	Zm00001d053432
LNC_002317	Zm00001d053432
LNC_002314	Zm00001d053432
LNC_002241	Zm00001d053432
LNC_002202	Zm00001d053432
LNC_002190	Zm00001d053432
LNC_001937	Zm00001d053432
LNC_001933	Zm00001d053432
LNC_001900	Zm00001d053432
LNC_001873	Zm00001d053432
LNC_001685	Zm00001d053432
LNC_001576	Zm00001d053432
LNC_001535	Zm00001d053432
LNC_001418	Zm00001d053432
LNC_001411	Zm00001d053432
LNC_001264	Zm00001d053432
LNC_000937	Zm00001d053432
LNC_000738	Zm00001d053432
LNC_000316	Zm00001d053432
LNC_006179	Zm00001d053412
LNC_006178	Zm00001d053412
LNC_006129	Zm00001d053412
LNC_006064	Zm00001d053412
LNC_006029	Zm00001d053412
LNC_005750	Zm00001d053412
LNC_005636	Zm00001d053412
LNC_005368	Zm00001d053412
LNC_005354	Zm00001d053412
LNC_005215	Zm00001d053412
LNC_004922	Zm00001d053412
LNC_004900	Zm00001d053412
LNC_004594	Zm00001d053412
LNC_004218	Zm00001d053412
LNC_003556	Zm00001d053412
LNC_003462	Zm00001d053412
LNC_003455	Zm00001d053412
LNC_003272	Zm00001d053412
LNC_003242	Zm00001d053412
LNC_002907	Zm00001d053412
LNC_002861	Zm00001d053412
LNC_002568	Zm00001d053412
LNC_002440	Zm00001d053412
LNC_002317	Zm00001d053412
LNC_002314	Zm00001d053412
LNC_002241	Zm00001d053412
LNC_001937	Zm00001d053412
LNC_001900	Zm00001d053412
LNC_001873	Zm00001d053412
LNC_001792	Zm00001d053412
LNC_001685	Zm00001d053412
LNC_001577	Zm00001d053412
LNC_001576	Zm00001d053412
LNC_001411	Zm00001d053412
LNC_001264	Zm00001d053412
LNC_000738	Zm00001d053412
LNC_000316	Zm00001d053412
LNC_006099	Zm00001d053394
LNC_006179	Zm00001d053377
LNC_006178	Zm00001d053377
LNC_006129	Zm00001d053377
LNC_006064	Zm00001d053377
LNC_006029	Zm00001d053377
LNC_005750	Zm00001d053377
LNC_005420	Zm00001d053377
LNC_005368	Zm00001d053377
LNC_004932	Zm00001d053377
LNC_004540	Zm00001d053377
LNC_004363	Zm00001d053377
LNC_003970	Zm00001d053377
LNC_003556	Zm00001d053377
LNC_003462	Zm00001d053377
LNC_003426	Zm00001d053377
LNC_003404	Zm00001d053377
LNC_003272	Zm00001d053377
LNC_002907	Zm00001d053377
LNC_002861	Zm00001d053377
LNC_002440	Zm00001d053377
LNC_002317	Zm00001d053377
LNC_002241	Zm00001d053377
LNC_002202	Zm00001d053377
LNC_001937	Zm00001d053377
LNC_001418	Zm00001d053377
LNC_001264	Zm00001d053377
LNC_006179	Zm00001d053374
LNC_006178	Zm00001d053374
LNC_006129	Zm00001d053374
LNC_006064	Zm00001d053374
LNC_006029	Zm00001d053374
LNC_005750	Zm00001d053374
LNC_005695	Zm00001d053374
LNC_005637	Zm00001d053374
LNC_005636	Zm00001d053374
LNC_005420	Zm00001d053374
LNC_005368	Zm00001d053374
LNC_005354	Zm00001d053374
LNC_004900	Zm00001d053374
LNC_004594	Zm00001d053374
LNC_004540	Zm00001d053374
LNC_004363	Zm00001d053374
LNC_004218	Zm00001d053374
LNC_003937	Zm00001d053374
LNC_003556	Zm00001d053374
LNC_003462	Zm00001d053374
LNC_003426	Zm00001d053374
LNC_003404	Zm00001d053374
LNC_003272	Zm00001d053374
LNC_003205	Zm00001d053374
LNC_002907	Zm00001d053374
LNC_002861	Zm00001d053374
LNC_002568	Zm00001d053374
LNC_002440	Zm00001d053374
LNC_002317	Zm00001d053374
LNC_002241	Zm00001d053374
LNC_002190	Zm00001d053374
LNC_001937	Zm00001d053374
LNC_001900	Zm00001d053374
LNC_001685	Zm00001d053374
LNC_001576	Zm00001d053374
LNC_001535	Zm00001d053374
LNC_001418	Zm00001d053374
LNC_001411	Zm00001d053374
LNC_001264	Zm00001d053374
LNC_000738	Zm00001d053374
LNC_000316	Zm00001d053374
LNC_006179	Zm00001d053358
LNC_006178	Zm00001d053358
LNC_006118	Zm00001d053358
LNC_006064	Zm00001d053358
LNC_006029	Zm00001d053358
LNC_005863	Zm00001d053358
LNC_005750	Zm00001d053358
LNC_005637	Zm00001d053358
LNC_005569	Zm00001d053358
LNC_005420	Zm00001d053358
LNC_005368	Zm00001d053358
LNC_005058	Zm00001d053358
LNC_004714	Zm00001d053358
LNC_004363	Zm00001d053358
LNC_003970	Zm00001d053358
LNC_003937	Zm00001d053358
LNC_003556	Zm00001d053358
LNC_003426	Zm00001d053358
LNC_003404	Zm00001d053358
LNC_003272	Zm00001d053358
LNC_003233	Zm00001d053358
LNC_002949	Zm00001d053358
LNC_002861	Zm00001d053358
LNC_002440	Zm00001d053358
LNC_002317	Zm00001d053358
LNC_002227	Zm00001d053358
LNC_002202	Zm00001d053358
LNC_002190	Zm00001d053358
LNC_001647	Zm00001d053358
LNC_001535	Zm00001d053358
LNC_001418	Zm00001d053358
LNC_001030	Zm00001d053358
LNC_000654	Zm00001d053358
LNC_000192	Zm00001d053358
LNC_006179	Zm00001d053342
LNC_006178	Zm00001d053342
LNC_006129	Zm00001d053342
LNC_006064	Zm00001d053342
LNC_006029	Zm00001d053342
LNC_005750	Zm00001d053342
LNC_005636	Zm00001d053342
LNC_005368	Zm00001d053342
LNC_005354	Zm00001d053342
LNC_004922	Zm00001d053342
LNC_004900	Zm00001d053342
LNC_004594	Zm00001d053342
LNC_004218	Zm00001d053342
LNC_003556	Zm00001d053342
LNC_003462	Zm00001d053342
LNC_003272	Zm00001d053342
LNC_003242	Zm00001d053342
LNC_002907	Zm00001d053342
LNC_002861	Zm00001d053342
LNC_002568	Zm00001d053342
LNC_002440	Zm00001d053342
LNC_002317	Zm00001d053342
LNC_002314	Zm00001d053342
LNC_002241	Zm00001d053342
LNC_001937	Zm00001d053342
LNC_001900	Zm00001d053342
LNC_001873	Zm00001d053342
LNC_001685	Zm00001d053342
LNC_001576	Zm00001d053342
LNC_001411	Zm00001d053342
LNC_001264	Zm00001d053342
LNC_000738	Zm00001d053342
LNC_000316	Zm00001d053342
LNC_005497	Zm00001d053236
LNC_006179	Zm00001d053223
LNC_006129	Zm00001d053223
LNC_006064	Zm00001d053223
LNC_005750	Zm00001d053223
LNC_005637	Zm00001d053223
LNC_005354	Zm00001d053223
LNC_004950	Zm00001d053223
LNC_004900	Zm00001d053223
LNC_004854	Zm00001d053223
LNC_004594	Zm00001d053223
LNC_004218	Zm00001d053223
LNC_003724	Zm00001d053223
LNC_003404	Zm00001d053223
LNC_003272	Zm00001d053223
LNC_003109	Zm00001d053223
LNC_002907	Zm00001d053223
LNC_002861	Zm00001d053223
LNC_002568	Zm00001d053223
LNC_002440	Zm00001d053223
LNC_002317	Zm00001d053223
LNC_002202	Zm00001d053223
LNC_001937	Zm00001d053223
LNC_001933	Zm00001d053223
LNC_001900	Zm00001d053223
LNC_001873	Zm00001d053223
LNC_001411	Zm00001d053223
LNC_001264	Zm00001d053223
LNC_000738	Zm00001d053223
LNC_000316	Zm00001d053223
LNC_000685	Zm00001d053220
LNC_006112	Zm00001d053215
LNC_002994	Zm00001d053215
LNC_001948	Zm00001d053215
LNC_006064	Zm00001d053202
LNC_005839	Zm00001d053202
LNC_005354	Zm00001d053202
LNC_004900	Zm00001d053202
LNC_004218	Zm00001d053202
LNC_003790	Zm00001d053202
LNC_003455	Zm00001d053202
LNC_002314	Zm00001d053202
LNC_001900	Zm00001d053202
LNC_001792	Zm00001d053202
LNC_001705	Zm00001d053202
LNC_001577	Zm00001d053202
LNC_000316	Zm00001d053202
LNC_000748	Zm00001d053133
LNC_001599	Zm00001d053117
LNC_000159	Zm00001d053117
LNC_006179	Zm00001d053103
LNC_006178	Zm00001d053103
LNC_006129	Zm00001d053103
LNC_006118	Zm00001d053103
LNC_006064	Zm00001d053103
LNC_006029	Zm00001d053103
LNC_005863	Zm00001d053103
LNC_005750	Zm00001d053103
LNC_005637	Zm00001d053103
LNC_005636	Zm00001d053103
LNC_005569	Zm00001d053103
LNC_005420	Zm00001d053103
LNC_005368	Zm00001d053103
LNC_005354	Zm00001d053103
LNC_005058	Zm00001d053103
LNC_004932	Zm00001d053103
LNC_004900	Zm00001d053103
LNC_004594	Zm00001d053103
LNC_004363	Zm00001d053103
LNC_004218	Zm00001d053103
LNC_003970	Zm00001d053103
LNC_003937	Zm00001d053103
LNC_003769	Zm00001d053103
LNC_003556	Zm00001d053103
LNC_003462	Zm00001d053103
LNC_003426	Zm00001d053103
LNC_003404	Zm00001d053103
LNC_003272	Zm00001d053103
LNC_003233	Zm00001d053103
LNC_003205	Zm00001d053103
LNC_002949	Zm00001d053103
LNC_002907	Zm00001d053103
LNC_002861	Zm00001d053103
LNC_002440	Zm00001d053103
LNC_002317	Zm00001d053103
LNC_002241	Zm00001d053103
LNC_002227	Zm00001d053103
LNC_002202	Zm00001d053103
LNC_002190	Zm00001d053103
LNC_001937	Zm00001d053103
LNC_001647	Zm00001d053103
LNC_001576	Zm00001d053103
LNC_001535	Zm00001d053103
LNC_001418	Zm00001d053103
LNC_001411	Zm00001d053103
LNC_001264	Zm00001d053103
LNC_001248	Zm00001d053103
LNC_001030	Zm00001d053103
LNC_000937	Zm00001d053103
LNC_000654	Zm00001d053103
LNC_000430	Zm00001d053103
LNC_000316	Zm00001d053103
LNC_000192	Zm00001d053103
LNC_005679	Zm00001d053102
LNC_004944	Zm00001d053102
LNC_004916	Zm00001d053102
LNC_004850	Zm00001d053102
LNC_003538	Zm00001d053102
LNC_002974	Zm00001d053102
LNC_002156	Zm00001d053102
LNC_001509	Zm00001d053102
LNC_001488	Zm00001d053102
LNC_001190	Zm00001d053102
LNC_001045	Zm00001d053102
LNC_000940	Zm00001d053102
LNC_004944	Zm00001d053066
LNC_004916	Zm00001d053066
LNC_002974	Zm00001d053066
LNC_001509	Zm00001d053066
LNC_001488	Zm00001d053066
LNC_001045	Zm00001d053066
LNC_000940	Zm00001d053066
LNC_000206	Zm00001d053066
LNC_006179	Zm00001d053035
LNC_006178	Zm00001d053035
LNC_006129	Zm00001d053035
LNC_006118	Zm00001d053035
LNC_006029	Zm00001d053035
LNC_005636	Zm00001d053035
LNC_005420	Zm00001d053035
LNC_005368	Zm00001d053035
LNC_005058	Zm00001d053035
LNC_004932	Zm00001d053035
LNC_004363	Zm00001d053035
LNC_003970	Zm00001d053035
LNC_003937	Zm00001d053035
LNC_003556	Zm00001d053035
LNC_003426	Zm00001d053035
LNC_003404	Zm00001d053035
LNC_003272	Zm00001d053035
LNC_003233	Zm00001d053035
LNC_003205	Zm00001d053035
LNC_002949	Zm00001d053035
LNC_002861	Zm00001d053035
LNC_002440	Zm00001d053035
LNC_002241	Zm00001d053035
LNC_002227	Zm00001d053035
LNC_002190	Zm00001d053035
LNC_001576	Zm00001d053035
LNC_001535	Zm00001d053035
LNC_001418	Zm00001d053035
LNC_001264	Zm00001d053035
LNC_001030	Zm00001d053035
LNC_000654	Zm00001d053035
LNC_000430	Zm00001d053035
LNC_000192	Zm00001d053035
LNC_006179	Zm00001d053015
LNC_006178	Zm00001d053015
LNC_006129	Zm00001d053015
LNC_006118	Zm00001d053015
LNC_006029	Zm00001d053015
LNC_005863	Zm00001d053015
LNC_005750	Zm00001d053015
LNC_005637	Zm00001d053015
LNC_005586	Zm00001d053015
LNC_005569	Zm00001d053015
LNC_005420	Zm00001d053015
LNC_005368	Zm00001d053015
LNC_005058	Zm00001d053015
LNC_004932	Zm00001d053015
LNC_004834	Zm00001d053015
LNC_004714	Zm00001d053015
LNC_004363	Zm00001d053015
LNC_003970	Zm00001d053015
LNC_003937	Zm00001d053015
LNC_003556	Zm00001d053015
LNC_003426	Zm00001d053015
LNC_003404	Zm00001d053015
LNC_003272	Zm00001d053015
LNC_003233	Zm00001d053015
LNC_002949	Zm00001d053015
LNC_002861	Zm00001d053015
LNC_002609	Zm00001d053015
LNC_002440	Zm00001d053015
LNC_002317	Zm00001d053015
LNC_002241	Zm00001d053015
LNC_002227	Zm00001d053015
LNC_002202	Zm00001d053015
LNC_002190	Zm00001d053015
LNC_002116	Zm00001d053015
LNC_001647	Zm00001d053015
LNC_001599	Zm00001d053015
LNC_001535	Zm00001d053015
LNC_001418	Zm00001d053015
LNC_001264	Zm00001d053015
LNC_001030	Zm00001d053015
LNC_000654	Zm00001d053015
LNC_000430	Zm00001d053015
LNC_000192	Zm00001d053015
LNC_005788	Zm00001d053007
LNC_005586	Zm00001d053007
LNC_004834	Zm00001d053007
LNC_004714	Zm00001d053007
LNC_003881	Zm00001d053007
LNC_003426	Zm00001d053007
LNC_002609	Zm00001d053007
LNC_002116	Zm00001d053007
LNC_001599	Zm00001d053007
LNC_000323	Zm00001d053007
LNC_000181	Zm00001d053007
LNC_005972	Zm00001d052875
LNC_005679	Zm00001d052875
LNC_004944	Zm00001d052875
LNC_004685	Zm00001d052875
LNC_004565	Zm00001d052875
LNC_004501	Zm00001d052875
LNC_004137	Zm00001d052875
LNC_003893	Zm00001d052875
LNC_003650	Zm00001d052875
LNC_003346	Zm00001d052875
LNC_002398	Zm00001d052875
LNC_002178	Zm00001d052875
LNC_002156	Zm00001d052875
LNC_002092	Zm00001d052875
LNC_001509	Zm00001d052875
LNC_001488	Zm00001d052875
LNC_001190	Zm00001d052875
LNC_000947	Zm00001d052875
LNC_000940	Zm00001d052875
LNC_000427	Zm00001d052875
LNC_006178	Zm00001d052840
LNC_006029	Zm00001d052840
LNC_005863	Zm00001d052840
LNC_005788	Zm00001d052840
LNC_005636	Zm00001d052840
LNC_005586	Zm00001d052840
LNC_005368	Zm00001d052840
LNC_004834	Zm00001d052840
LNC_004714	Zm00001d052840
LNC_004540	Zm00001d052840
LNC_004363	Zm00001d052840
LNC_003970	Zm00001d052840
LNC_003937	Zm00001d052840
LNC_003881	Zm00001d052840
LNC_003665	Zm00001d052840
LNC_003556	Zm00001d052840
LNC_003426	Zm00001d052840
LNC_002994	Zm00001d052840
LNC_002907	Zm00001d052840
LNC_002861	Zm00001d052840
LNC_002609	Zm00001d052840
LNC_002568	Zm00001d052840
LNC_002453	Zm00001d052840
LNC_002227	Zm00001d052840
LNC_002190	Zm00001d052840
LNC_002116	Zm00001d052840
LNC_001647	Zm00001d052840
LNC_001604	Zm00001d052840
LNC_001599	Zm00001d052840
LNC_001535	Zm00001d052840
LNC_001418	Zm00001d052840
LNC_001264	Zm00001d052840
LNC_001186	Zm00001d052840
LNC_000738	Zm00001d052840
LNC_000654	Zm00001d052840
LNC_000514	Zm00001d052840
LNC_000323	Zm00001d052840
LNC_000181	Zm00001d052840
LNC_006010	Zm00001d052827
LNC_005750	Zm00001d052827
LNC_005637	Zm00001d052827
LNC_005569	Zm00001d052827
LNC_005058	Zm00001d052827
LNC_004158	Zm00001d052827
LNC_003769	Zm00001d052827
LNC_003768	Zm00001d052827
LNC_003724	Zm00001d052827
LNC_003623	Zm00001d052827
LNC_003404	Zm00001d052827
LNC_003233	Zm00001d052827
LNC_002949	Zm00001d052827
LNC_002874	Zm00001d052827
LNC_002687	Zm00001d052827
LNC_002440	Zm00001d052827
LNC_002202	Zm00001d052827
LNC_001425	Zm00001d052827
LNC_001308	Zm00001d052827
LNC_001248	Zm00001d052827
LNC_001183	Zm00001d052827
LNC_001030	Zm00001d052827
LNC_000937	Zm00001d052827
LNC_000920	Zm00001d052827
LNC_000612	Zm00001d052827
LNC_000608	Zm00001d052827
LNC_000430	Zm00001d052827
LNC_000192	Zm00001d052827
LNC_002994	Zm00001d052810
LNC_006112	Zm00001d052792
LNC_002994	Zm00001d052792
LNC_001948	Zm00001d052792
LNC_005064	Zm00001d052779
LNC_006179	Zm00001d052760
LNC_006178	Zm00001d052760
LNC_006129	Zm00001d052760
LNC_006029	Zm00001d052760
LNC_005636	Zm00001d052760
LNC_005368	Zm00001d052760
LNC_004540	Zm00001d052760
LNC_004363	Zm00001d052760
LNC_004218	Zm00001d052760
LNC_003556	Zm00001d052760
LNC_003462	Zm00001d052760
LNC_003272	Zm00001d052760
LNC_002907	Zm00001d052760
LNC_002861	Zm00001d052760
LNC_002241	Zm00001d052760
LNC_001937	Zm00001d052760
LNC_001264	Zm00001d052760
LNC_000738	Zm00001d052760
LNC_001948	Zm00001d052738
LNC_002909	Zm00001d052717
LNC_006179	Zm00001d052682
LNC_006178	Zm00001d052682
LNC_006118	Zm00001d052682
LNC_006064	Zm00001d052682
LNC_006029	Zm00001d052682
LNC_006010	Zm00001d052682
LNC_005863	Zm00001d052682
LNC_005750	Zm00001d052682
LNC_005695	Zm00001d052682
LNC_005637	Zm00001d052682
LNC_005569	Zm00001d052682
LNC_005420	Zm00001d052682
LNC_005368	Zm00001d052682
LNC_005354	Zm00001d052682
LNC_005177	Zm00001d052682
LNC_005079	Zm00001d052682
LNC_005058	Zm00001d052682
LNC_004950	Zm00001d052682
LNC_004900	Zm00001d052682
LNC_004363	Zm00001d052682
LNC_004218	Zm00001d052682
LNC_003970	Zm00001d052682
LNC_003937	Zm00001d052682
LNC_003769	Zm00001d052682
LNC_003768	Zm00001d052682
LNC_003623	Zm00001d052682
LNC_003556	Zm00001d052682
LNC_003404	Zm00001d052682
LNC_003272	Zm00001d052682
LNC_003233	Zm00001d052682
LNC_003178	Zm00001d052682
LNC_003109	Zm00001d052682
LNC_002949	Zm00001d052682
LNC_002907	Zm00001d052682
LNC_002440	Zm00001d052682
LNC_002317	Zm00001d052682
LNC_002227	Zm00001d052682
LNC_002202	Zm00001d052682
LNC_002190	Zm00001d052682
LNC_001937	Zm00001d052682
LNC_001900	Zm00001d052682
LNC_001578	Zm00001d052682
LNC_001535	Zm00001d052682
LNC_001425	Zm00001d052682
LNC_001418	Zm00001d052682
LNC_001411	Zm00001d052682
LNC_001264	Zm00001d052682
LNC_001248	Zm00001d052682
LNC_001030	Zm00001d052682
LNC_000937	Zm00001d052682
LNC_000654	Zm00001d052682
LNC_000608	Zm00001d052682
LNC_000430	Zm00001d052682
LNC_000316	Zm00001d052682
LNC_000192	Zm00001d052682
LNC_006112	Zm00001d052661
LNC_001948	Zm00001d052661
LNC_006179	Zm00001d052657
LNC_006064	Zm00001d052657
LNC_005839	Zm00001d052657
LNC_005637	Zm00001d052657
LNC_005354	Zm00001d052657
LNC_005215	Zm00001d052657
LNC_004900	Zm00001d052657
LNC_004594	Zm00001d052657
LNC_004429	Zm00001d052657
LNC_004218	Zm00001d052657
LNC_003790	Zm00001d052657
LNC_003455	Zm00001d052657
LNC_003248	Zm00001d052657
LNC_003242	Zm00001d052657
LNC_003109	Zm00001d052657
LNC_002941	Zm00001d052657
LNC_002930	Zm00001d052657
LNC_002907	Zm00001d052657
LNC_002568	Zm00001d052657
LNC_002505	Zm00001d052657
LNC_002317	Zm00001d052657
LNC_002314	Zm00001d052657
LNC_002059	Zm00001d052657
LNC_001937	Zm00001d052657
LNC_001933	Zm00001d052657
LNC_001900	Zm00001d052657
LNC_001873	Zm00001d052657
LNC_001792	Zm00001d052657
LNC_001705	Zm00001d052657
LNC_001685	Zm00001d052657
LNC_001577	Zm00001d052657
LNC_001545	Zm00001d052657
LNC_001460	Zm00001d052657
LNC_001411	Zm00001d052657
LNC_000738	Zm00001d052657
LNC_000574	Zm00001d052657
LNC_000316	Zm00001d052657
LNC_006179	Zm00001d052622
LNC_006178	Zm00001d052622
LNC_006129	Zm00001d052622
LNC_006064	Zm00001d052622
LNC_006029	Zm00001d052622
LNC_005750	Zm00001d052622
LNC_005637	Zm00001d052622
LNC_005636	Zm00001d052622
LNC_005420	Zm00001d052622
LNC_005368	Zm00001d052622
LNC_005354	Zm00001d052622
LNC_005058	Zm00001d052622
LNC_004922	Zm00001d052622
LNC_004900	Zm00001d052622
LNC_004854	Zm00001d052622
LNC_004594	Zm00001d052622
LNC_004429	Zm00001d052622
LNC_004363	Zm00001d052622
LNC_004218	Zm00001d052622
LNC_003970	Zm00001d052622
LNC_003937	Zm00001d052622
LNC_003769	Zm00001d052622
LNC_003724	Zm00001d052622
LNC_003556	Zm00001d052622
LNC_003455	Zm00001d052622
LNC_003404	Zm00001d052622
LNC_003272	Zm00001d052622
LNC_003242	Zm00001d052622
LNC_002907	Zm00001d052622
LNC_002861	Zm00001d052622
LNC_002568	Zm00001d052622
LNC_002440	Zm00001d052622
LNC_002317	Zm00001d052622
LNC_002314	Zm00001d052622
LNC_002241	Zm00001d052622
LNC_002227	Zm00001d052622
LNC_002190	Zm00001d052622
LNC_001937	Zm00001d052622
LNC_001933	Zm00001d052622
LNC_001900	Zm00001d052622
LNC_001873	Zm00001d052622
LNC_001685	Zm00001d052622
LNC_001647	Zm00001d052622
LNC_001577	Zm00001d052622
LNC_001576	Zm00001d052622
LNC_001535	Zm00001d052622
LNC_001460	Zm00001d052622
LNC_001418	Zm00001d052622
LNC_001411	Zm00001d052622
LNC_001264	Zm00001d052622
LNC_000937	Zm00001d052622
LNC_000738	Zm00001d052622
LNC_000430	Zm00001d052622
LNC_000316	Zm00001d052622
LNC_000050	Zm00001d052622
LNC_006179	Zm00001d052621
LNC_006178	Zm00001d052621
LNC_006129	Zm00001d052621
LNC_006064	Zm00001d052621
LNC_006029	Zm00001d052621
LNC_006010	Zm00001d052621
LNC_005863	Zm00001d052621
LNC_005779	Zm00001d052621
LNC_005695	Zm00001d052621
LNC_005637	Zm00001d052621
LNC_005636	Zm00001d052621
LNC_005569	Zm00001d052621
LNC_005420	Zm00001d052621
LNC_005368	Zm00001d052621
LNC_005354	Zm00001d052621
LNC_005215	Zm00001d052621
LNC_005058	Zm00001d052621
LNC_004950	Zm00001d052621
LNC_004932	Zm00001d052621
LNC_004922	Zm00001d052621
LNC_004900	Zm00001d052621
LNC_004594	Zm00001d052621
LNC_004363	Zm00001d052621
LNC_004218	Zm00001d052621
LNC_003970	Zm00001d052621
LNC_003937	Zm00001d052621
LNC_003769	Zm00001d052621
LNC_003768	Zm00001d052621
LNC_003623	Zm00001d052621
LNC_003556	Zm00001d052621
LNC_003462	Zm00001d052621
LNC_003455	Zm00001d052621
LNC_003404	Zm00001d052621
LNC_003272	Zm00001d052621
LNC_003242	Zm00001d052621
LNC_003233	Zm00001d052621
LNC_002949	Zm00001d052621
LNC_002930	Zm00001d052621
LNC_002907	Zm00001d052621
LNC_002861	Zm00001d052621
LNC_002568	Zm00001d052621
LNC_002440	Zm00001d052621
LNC_002317	Zm00001d052621
LNC_002227	Zm00001d052621
LNC_002190	Zm00001d052621
LNC_002059	Zm00001d052621
LNC_001937	Zm00001d052621
LNC_001933	Zm00001d052621
LNC_001900	Zm00001d052621
LNC_001647	Zm00001d052621
LNC_001577	Zm00001d052621
LNC_001576	Zm00001d052621
LNC_001545	Zm00001d052621
LNC_001535	Zm00001d052621
LNC_001418	Zm00001d052621
LNC_001411	Zm00001d052621
LNC_001264	Zm00001d052621
LNC_001248	Zm00001d052621
LNC_001030	Zm00001d052621
LNC_000937	Zm00001d052621
LNC_000608	Zm00001d052621
LNC_000430	Zm00001d052621
LNC_000316	Zm00001d052621
LNC_000192	Zm00001d052621
LNC_006112	Zm00001d052612
LNC_002994	Zm00001d052612
LNC_002700	Zm00001d052612
LNC_001948	Zm00001d052612
LNC_006178	Zm00001d052595
LNC_006118	Zm00001d052595
LNC_005586	Zm00001d052595
LNC_004932	Zm00001d052595
LNC_004834	Zm00001d052595
LNC_004714	Zm00001d052595
LNC_004363	Zm00001d052595
LNC_003970	Zm00001d052595
LNC_003937	Zm00001d052595
LNC_003881	Zm00001d052595
LNC_003426	Zm00001d052595
LNC_002609	Zm00001d052595
LNC_002395	Zm00001d052595
LNC_002227	Zm00001d052595
LNC_002116	Zm00001d052595
LNC_001647	Zm00001d052595
LNC_001599	Zm00001d052595
LNC_001535	Zm00001d052595
LNC_001418	Zm00001d052595
LNC_000654	Zm00001d052595
LNC_000323	Zm00001d052595
LNC_000181	Zm00001d052595
LNC_006179	Zm00001d052556
LNC_006129	Zm00001d052556
LNC_006064	Zm00001d052556
LNC_005750	Zm00001d052556
LNC_005636	Zm00001d052556
LNC_005420	Zm00001d052556
LNC_005368	Zm00001d052556
LNC_005354	Zm00001d052556
LNC_004922	Zm00001d052556
LNC_004900	Zm00001d052556
LNC_004854	Zm00001d052556
LNC_004218	Zm00001d052556
LNC_003272	Zm00001d052556
LNC_003242	Zm00001d052556
LNC_002907	Zm00001d052556
LNC_002861	Zm00001d052556
LNC_002568	Zm00001d052556
LNC_002440	Zm00001d052556
LNC_002241	Zm00001d052556
LNC_001937	Zm00001d052556
LNC_001900	Zm00001d052556
LNC_001873	Zm00001d052556
LNC_001576	Zm00001d052556
LNC_001411	Zm00001d052556
LNC_001264	Zm00001d052556
LNC_000738	Zm00001d052556
LNC_000316	Zm00001d052556
LNC_005497	Zm00001d052478
LNC_002793	Zm00001d052478
LNC_002358	Zm00001d052478
LNC_001188	Zm00001d052478
LNC_000231	Zm00001d052478
LNC_000228	Zm00001d052478
LNC_001488	Zm00001d052409
LNC_001045	Zm00001d052409
LNC_000940	Zm00001d052409
LNC_004925	Zm00001d052391
LNC_002700	Zm00001d052324
LNC_003842	Zm00001d052316
LNC_003784	Zm00001d052316
LNC_003538	Zm00001d052316
LNC_001976	Zm00001d052316
LNC_001215	Zm00001d052316
LNC_000686	Zm00001d052316
LNC_006179	Zm00001d052295
LNC_006178	Zm00001d052295
LNC_006029	Zm00001d052295
LNC_005788	Zm00001d052295
[truncated: 57,578 more rows]

## Sheet: R_lncRNA-mRNA
lncRNA_id	gene_id
LNC_006127	Zm00001d054093
LNC_004754	Zm00001d054093
LNC_003272	Zm00001d054093
LNC_001952	Zm00001d054093
LNC_001573	Zm00001d054093
LNC_000843	Zm00001d054093
LNC_005707	Zm00001d054085
LNC_005514	Zm00001d054085
LNC_004592	Zm00001d054085
LNC_003032	Zm00001d054085
LNC_002994	Zm00001d054085
LNC_001763	Zm00001d054085
LNC_000923	Zm00001d054085
LNC_000852	Zm00001d054085
LNC_000019	Zm00001d054085
LNC_005902	Zm00001d054084
LNC_001077	Zm00001d054084
LNC_000348	Zm00001d054084
LNC_005707	Zm00001d054071
LNC_005514	Zm00001d054071
LNC_003047	Zm00001d054071
LNC_003046	Zm00001d054071
LNC_003032	Zm00001d054071
LNC_001769	Zm00001d054071
LNC_000914	Zm00001d054071
LNC_000196	Zm00001d054071
LNC_005707	Zm00001d054066
LNC_005514	Zm00001d054066
LNC_003738	Zm00001d054066
LNC_003046	Zm00001d054066
LNC_002700	Zm00001d054066
LNC_001278	Zm00001d054066
LNC_000196	Zm00001d054066
LNC_004922	Zm00001d054062
LNC_002568	Zm00001d054062
LNC_001879	Zm00001d054062
LNC_001789	Zm00001d054062
LNC_005902	Zm00001d054060
LNC_005435	Zm00001d054060
LNC_005275	Zm00001d054060
LNC_005183	Zm00001d054060
LNC_004383	Zm00001d054060
LNC_004282	Zm00001d054060
LNC_003854	Zm00001d054060
LNC_003497	Zm00001d054060
LNC_001605	Zm00001d054060
LNC_005902	Zm00001d054057
LNC_005435	Zm00001d054057
LNC_005275	Zm00001d054057
LNC_004383	Zm00001d054057
LNC_004282	Zm00001d054057
LNC_003854	Zm00001d054057
LNC_003497	Zm00001d054057
LNC_002107	Zm00001d054057
LNC_003272	Zm00001d054015
LNC_006112	Zm00001d054012
LNC_005707	Zm00001d054012
LNC_005512	Zm00001d054012
LNC_002994	Zm00001d054012
LNC_002596	Zm00001d054012
LNC_001763	Zm00001d054012
LNC_000923	Zm00001d054012
LNC_005707	Zm00001d054010
LNC_006260	Zm00001d054000
LNC_004776	Zm00001d054000
LNC_002887	Zm00001d054000
LNC_000019	Zm00001d054000
LNC_003738	Zm00001d053996
LNC_003046	Zm00001d053996
LNC_001769	Zm00001d053996
LNC_000914	Zm00001d053996
LNC_000196	Zm00001d053996
LNC_005143	Zm00001d053989
LNC_005707	Zm00001d053899
LNC_002994	Zm00001d053899
LNC_000196	Zm00001d053899
LNC_005707	Zm00001d053884
LNC_005514	Zm00001d053884
LNC_004592	Zm00001d053884
LNC_003032	Zm00001d053884
LNC_001763	Zm00001d053884
LNC_000852	Zm00001d053884
LNC_005902	Zm00001d053857
LNC_005707	Zm00001d053856
LNC_005514	Zm00001d053856
LNC_004592	Zm00001d053856
LNC_003047	Zm00001d053856
LNC_003046	Zm00001d053856
LNC_003032	Zm00001d053856
LNC_000852	Zm00001d053856
LNC_005707	Zm00001d053852
LNC_003738	Zm00001d053852
LNC_003046	Zm00001d053852
LNC_003032	Zm00001d053852
LNC_002994	Zm00001d053852
LNC_002700	Zm00001d053852
LNC_002596	Zm00001d053852
LNC_000914	Zm00001d053852
LNC_000196	Zm00001d053852
LNC_005707	Zm00001d053839
LNC_005514	Zm00001d053839
LNC_004592	Zm00001d053839
LNC_003032	Zm00001d053839
LNC_002994	Zm00001d053839
LNC_001763	Zm00001d053839
LNC_000852	Zm00001d053839
LNC_000019	Zm00001d053839
LNC_000839	Zm00001d053838
LNC_005707	Zm00001d053830
LNC_003738	Zm00001d053830
LNC_003046	Zm00001d053830
LNC_002994	Zm00001d053830
LNC_002700	Zm00001d053830
LNC_002596	Zm00001d053830
LNC_000914	Zm00001d053830
LNC_000196	Zm00001d053830
LNC_006109	Zm00001d053819
LNC_005902	Zm00001d053819
LNC_005143	Zm00001d053819
LNC_003966	Zm00001d053819
LNC_003564	Zm00001d053819
LNC_001242	Zm00001d053819
LNC_000976	Zm00001d053819
LNC_003272	Zm00001d053801
LNC_006112	Zm00001d053766
LNC_005707	Zm00001d053766
LNC_005514	Zm00001d053766
LNC_003738	Zm00001d053766
LNC_003047	Zm00001d053766
LNC_003046	Zm00001d053766
LNC_003032	Zm00001d053766
LNC_002994	Zm00001d053766
LNC_002596	Zm00001d053766
LNC_001769	Zm00001d053766
LNC_001763	Zm00001d053766
LNC_001278	Zm00001d053766
LNC_000914	Zm00001d053766
LNC_000196	Zm00001d053766
LNC_004526	Zm00001d053761
LNC_004063	Zm00001d053761
LNC_001793	Zm00001d053761
LNC_001092	Zm00001d053761
LNC_000786	Zm00001d053761
LNC_005539	Zm00001d053759
LNC_005330	Zm00001d053759
LNC_002994	Zm00001d053759
LNC_001763	Zm00001d053759
LNC_000923	Zm00001d053759
LNC_002933	Zm00001d053754
LNC_000188	Zm00001d053754
LNC_006112	Zm00001d053725
LNC_005707	Zm00001d053725
LNC_005539	Zm00001d053725
LNC_005330	Zm00001d053725
LNC_004592	Zm00001d053725
LNC_002994	Zm00001d053725
LNC_001763	Zm00001d053725
LNC_000948	Zm00001d053725
LNC_000923	Zm00001d053725
LNC_000852	Zm00001d053725
LNC_000914	Zm00001d053715
LNC_000839	Zm00001d053715
LNC_005707	Zm00001d053706
LNC_005285	Zm00001d053706
LNC_005055	Zm00001d053706
LNC_004790	Zm00001d053706
LNC_003974	Zm00001d053706
LNC_003047	Zm00001d053706
LNC_003032	Zm00001d053706
LNC_002495	Zm00001d053706
LNC_001947	Zm00001d053706
LNC_001913	Zm00001d053706
LNC_001763	Zm00001d053706
LNC_001749	Zm00001d053706
LNC_001693	Zm00001d053706
LNC_000497	Zm00001d053706
LNC_000399	Zm00001d053706
LNC_000187	Zm00001d053706
LNC_005707	Zm00001d053699
LNC_005514	Zm00001d053699
LNC_004592	Zm00001d053699
LNC_003047	Zm00001d053699
LNC_003032	Zm00001d053699
LNC_001763	Zm00001d053699
LNC_000852	Zm00001d053699
LNC_004538	Zm00001d053675
LNC_002199	Zm00001d053675
LNC_001952	Zm00001d053675
LNC_001749	Zm00001d053672
LNC_000348	Zm00001d053672
LNC_005285	Zm00001d053619
LNC_003492	Zm00001d053619
LNC_000761	Zm00001d053619
LNC_000156	Zm00001d053619
LNC_005707	Zm00001d053586
LNC_005514	Zm00001d053586
LNC_003738	Zm00001d053586
LNC_003047	Zm00001d053586
LNC_003046	Zm00001d053586
LNC_003032	Zm00001d053586
LNC_002700	Zm00001d053586
LNC_001769	Zm00001d053586
LNC_000914	Zm00001d053586
LNC_000196	Zm00001d053586
LNC_004243	Zm00001d053579
LNC_003954	Zm00001d053579
LNC_003854	Zm00001d053579
LNC_002848	Zm00001d053579
LNC_000941	Zm00001d053579
LNC_005951	Zm00001d053547
LNC_004526	Zm00001d053547
LNC_001793	Zm00001d053547
LNC_001092	Zm00001d053547
LNC_000976	Zm00001d053547
LNC_004592	Zm00001d053544
LNC_000852	Zm00001d053544
LNC_005861	Zm00001d053453
LNC_004790	Zm00001d053453
LNC_004093	Zm00001d053453
LNC_003353	Zm00001d053453
LNC_002676	Zm00001d053453
LNC_002450	Zm00001d053453
LNC_001568	Zm00001d053453
LNC_001524	Zm00001d053453
LNC_001165	Zm00001d053453
LNC_001010	Zm00001d053453
LNC_000298	Zm00001d053453
LNC_000135	Zm00001d053453
LNC_005215	Zm00001d053432
LNC_004922	Zm00001d053432
LNC_004877	Zm00001d053432
LNC_003499	Zm00001d053432
LNC_003272	Zm00001d053432
LNC_002568	Zm00001d053432
LNC_002476	Zm00001d053432
LNC_001879	Zm00001d053432
LNC_005707	Zm00001d053425
LNC_005514	Zm00001d053425
LNC_003738	Zm00001d053425
LNC_003046	Zm00001d053425
LNC_002994	Zm00001d053425
LNC_002700	Zm00001d053425
LNC_001278	Zm00001d053425
LNC_000948	Zm00001d053425
LNC_000914	Zm00001d053425
LNC_000196	Zm00001d053425
LNC_005701	Zm00001d053412
LNC_005215	Zm00001d053412
LNC_004941	Zm00001d053412
LNC_004922	Zm00001d053412
LNC_004877	Zm00001d053412
LNC_004482	Zm00001d053412
LNC_003832	Zm00001d053412
LNC_003499	Zm00001d053412
LNC_003272	Zm00001d053412
LNC_002568	Zm00001d053412
LNC_002548	Zm00001d053412
LNC_002476	Zm00001d053412
LNC_001879	Zm00001d053412
LNC_006112	Zm00001d053382
LNC_005707	Zm00001d053382
LNC_005512	Zm00001d053382
LNC_004781	Zm00001d053382
LNC_002994	Zm00001d053382
LNC_002596	Zm00001d053382
LNC_000923	Zm00001d053382
LNC_005902	Zm00001d053369
LNC_003954	Zm00001d053369
LNC_003565	Zm00001d053369
LNC_003564	Zm00001d053369
LNC_002107	Zm00001d053369
LNC_001492	Zm00001d053369
LNC_006260	Zm00001d053322
LNC_005055	Zm00001d053322
LNC_004790	Zm00001d053322
LNC_004776	Zm00001d053322
LNC_004592	Zm00001d053322
LNC_002711	Zm00001d053322
LNC_001524	Zm00001d053322
LNC_000852	Zm00001d053322
LNC_000187	Zm00001d053322
LNC_000019	Zm00001d053322
LNC_002107	Zm00001d053293
LNC_005902	Zm00001d053281
LNC_005435	Zm00001d053281
LNC_005275	Zm00001d053281
LNC_005183	Zm00001d053281
LNC_004383	Zm00001d053281
LNC_004282	Zm00001d053281
LNC_004243	Zm00001d053281
LNC_003854	Zm00001d053281
LNC_003497	Zm00001d053281
LNC_001605	Zm00001d053281
LNC_001077	Zm00001d053281
LNC_000941	Zm00001d053281
LNC_000074	Zm00001d053281
LNC_000685	Zm00001d053220
LNC_006112	Zm00001d053215
LNC_005707	Zm00001d053215
LNC_002994	Zm00001d053215
LNC_002596	Zm00001d053215
LNC_005514	Zm00001d053181
LNC_003738	Zm00001d053181
LNC_003047	Zm00001d053181
LNC_003046	Zm00001d053181
LNC_003032	Zm00001d053181
LNC_001769	Zm00001d053181
LNC_000914	Zm00001d053181
LNC_000196	Zm00001d053181
LNC_003974	Zm00001d053163
LNC_003393	Zm00001d053163
LNC_002495	Zm00001d053163
LNC_001749	Zm00001d053163
LNC_001693	Zm00001d053163
LNC_001607	Zm00001d053163
LNC_000497	Zm00001d053163
LNC_000399	Zm00001d053163
LNC_000295	Zm00001d053163
LNC_005707	Zm00001d053162
LNC_005514	Zm00001d053162
LNC_005055	Zm00001d053162
LNC_004592	Zm00001d053162
LNC_001763	Zm00001d053162
LNC_001278	Zm00001d053162
LNC_000852	Zm00001d053162
LNC_000019	Zm00001d053162
LNC_005707	Zm00001d053156
LNC_005514	Zm00001d053156
LNC_004592	Zm00001d053156
LNC_003047	Zm00001d053156
LNC_003046	Zm00001d053156
LNC_003032	Zm00001d053156
LNC_001763	Zm00001d053156
LNC_001278	Zm00001d053156
LNC_000914	Zm00001d053156
LNC_000852	Zm00001d053156
LNC_000196	Zm00001d053156
LNC_004941	Zm00001d053149
LNC_004922	Zm00001d053149
LNC_003832	Zm00001d053149
LNC_002568	Zm00001d053149
LNC_002476	Zm00001d053149
LNC_001879	Zm00001d053149
LNC_001789	Zm00001d053149
LNC_005707	Zm00001d053139
LNC_005514	Zm00001d053139
LNC_003738	Zm00001d053139
LNC_003047	Zm00001d053139
LNC_003046	Zm00001d053139
LNC_003032	Zm00001d053139
LNC_002994	Zm00001d053139
LNC_002700	Zm00001d053139
LNC_002596	Zm00001d053139
LNC_001769	Zm00001d053139
LNC_000914	Zm00001d053139
LNC_000196	Zm00001d053139
LNC_006260	Zm00001d053118
LNC_005285	Zm00001d053118
LNC_005055	Zm00001d053118
LNC_004790	Zm00001d053118
LNC_004776	Zm00001d053118
LNC_004764	Zm00001d053118
LNC_004651	Zm00001d053118
LNC_002711	Zm00001d053118
LNC_001913	Zm00001d053118
LNC_000761	Zm00001d053118
LNC_000187	Zm00001d053118
LNC_005679	Zm00001d053102
LNC_005285	Zm00001d053094
LNC_005055	Zm00001d053094
LNC_004592	Zm00001d053094
LNC_003032	Zm00001d053094
LNC_002088	Zm00001d053094
LNC_001913	Zm00001d053094
LNC_000852	Zm00001d053094
LNC_000839	Zm00001d053094
LNC_000761	Zm00001d053094
LNC_002966	Zm00001d053062
LNC_002107	Zm00001d053062
LNC_005707	Zm00001d053060
LNC_005514	Zm00001d053060
LNC_004592	Zm00001d053060
LNC_003738	Zm00001d053060
LNC_003047	Zm00001d053060
LNC_003046	Zm00001d053060
LNC_003032	Zm00001d053060
LNC_001769	Zm00001d053060
LNC_000914	Zm00001d053060
LNC_000196	Zm00001d053060
LNC_005707	Zm00001d053055
LNC_004781	Zm00001d053055
LNC_001278	Zm00001d053055
LNC_005514	Zm00001d053050
LNC_003738	Zm00001d053050
LNC_003047	Zm00001d053050
LNC_003046	Zm00001d053050
LNC_003032	Zm00001d053050
LNC_001769	Zm00001d053050
LNC_000914	Zm00001d053050
LNC_000839	Zm00001d053050
LNC_000196	Zm00001d053050
LNC_005707	Zm00001d053049
LNC_005514	Zm00001d053049
LNC_003047	Zm00001d053049
LNC_003046	Zm00001d053049
LNC_003032	Zm00001d053049
LNC_001769	Zm00001d053049
LNC_000914	Zm00001d053049
LNC_000839	Zm00001d053049
LNC_000196	Zm00001d053049
LNC_006112	Zm00001d053020
LNC_005707	Zm00001d053020
LNC_005514	Zm00001d053020
LNC_003738	Zm00001d053020
LNC_003047	Zm00001d053020
LNC_003046	Zm00001d053020
LNC_003032	Zm00001d053020
LNC_002994	Zm00001d053020
LNC_002700	Zm00001d053020
LNC_002596	Zm00001d053020
LNC_001769	Zm00001d053020
LNC_001278	Zm00001d053020
LNC_000914	Zm00001d053020
LNC_000196	Zm00001d053020
LNC_005055	Zm00001d053008
LNC_004790	Zm00001d053008
LNC_004592	Zm00001d053008
LNC_001947	Zm00001d053008
LNC_001913	Zm00001d053008
LNC_000852	Zm00001d053008
LNC_000187	Zm00001d053008
LNC_000019	Zm00001d053008
LNC_005707	Zm00001d053004
LNC_002700	Zm00001d053004
LNC_002107	Zm00001d052999
LNC_006112	Zm00001d052978
LNC_005707	Zm00001d052978
LNC_005514	Zm00001d052978
LNC_004592	Zm00001d052978
LNC_003738	Zm00001d052978
LNC_003046	Zm00001d052978
LNC_003032	Zm00001d052978
LNC_002994	Zm00001d052978
LNC_000914	Zm00001d052978
LNC_000196	Zm00001d052978
LNC_006112	Zm00001d052974
LNC_005707	Zm00001d052974
LNC_005539	Zm00001d052974
LNC_005512	Zm00001d052974
LNC_005330	Zm00001d052974
LNC_002994	Zm00001d052974
LNC_001763	Zm00001d052974
LNC_000923	Zm00001d052974
LNC_005707	Zm00001d052967
LNC_005512	Zm00001d052967
LNC_002994	Zm00001d052967
LNC_005938	Zm00001d052963
LNC_004813	Zm00001d052963
LNC_003142	Zm00001d052963
LNC_005707	Zm00001d052953
LNC_002994	Zm00001d052953
LNC_001763	Zm00001d052953
LNC_001278	Zm00001d052953
LNC_005539	Zm00001d052944
LNC_005330	Zm00001d052944
LNC_004526	Zm00001d052939
LNC_001092	Zm00001d052939
LNC_005902	Zm00001d052938
LNC_004282	Zm00001d052938
LNC_001941	Zm00001d052935
LNC_000348	Zm00001d052935
LNC_004941	Zm00001d052932
LNC_002568	Zm00001d052932
LNC_002476	Zm00001d052932
LNC_003974	Zm00001d052923
LNC_002495	Zm00001d052923
LNC_001749	Zm00001d052923
LNC_001693	Zm00001d052923
LNC_000560	Zm00001d052923
LNC_000497	Zm00001d052923
LNC_000399	Zm00001d052923
LNC_000295	Zm00001d052923
LNC_006112	Zm00001d052903
LNC_005707	Zm00001d052903
LNC_005514	Zm00001d052903
LNC_004592	Zm00001d052903
LNC_003046	Zm00001d052903
LNC_003032	Zm00001d052903
LNC_002994	Zm00001d052903
LNC_002596	Zm00001d052903
LNC_001763	Zm00001d052903
LNC_001278	Zm00001d052903
LNC_000923	Zm00001d052903
LNC_000914	Zm00001d052903
LNC_000852	Zm00001d052903
LNC_000196	Zm00001d052903
LNC_006096	Zm00001d052898
LNC_000948	Zm00001d052898
LNC_004063	Zm00001d052885
LNC_001793	Zm00001d052885
LNC_001077	Zm00001d052885
LNC_003738	Zm00001d052864
LNC_003046	Zm00001d052864
LNC_001941	Zm00001d052864
LNC_000914	Zm00001d052864
LNC_000196	Zm00001d052864
LNC_004790	Zm00001d052842
LNC_004764	Zm00001d052842
LNC_004651	Zm00001d052842
LNC_003974	Zm00001d052842
LNC_001693	Zm00001d052842
LNC_001607	Zm00001d052842
LNC_001524	Zm00001d052842
LNC_000399	Zm00001d052842
LNC_000295	Zm00001d052842
LNC_006112	Zm00001d052841
LNC_005707	Zm00001d052841
LNC_005514	Zm00001d052841
LNC_003738	Zm00001d052841
LNC_003047	Zm00001d052841
LNC_003046	Zm00001d052841
LNC_003032	Zm00001d052841
LNC_002994	Zm00001d052841
LNC_002700	Zm00001d052841
LNC_002596	Zm00001d052841
LNC_001769	Zm00001d052841
LNC_001763	Zm00001d052841
LNC_001278	Zm00001d052841
LNC_000914	Zm00001d052841
LNC_000196	Zm00001d052841
LNC_006112	Zm00001d052835
LNC_005512	Zm00001d052835
LNC_004781	Zm00001d052835
LNC_002994	Zm00001d052835
LNC_005707	Zm00001d052810
LNC_002994	Zm00001d052810
LNC_001763	Zm00001d052810
LNC_003047	Zm00001d052793
LNC_002088	Zm00001d052793
LNC_006112	Zm00001d052792
LNC_005707	Zm00001d052792
LNC_005514	Zm00001d052792
LNC_004592	Zm00001d052792
LNC_003046	Zm00001d052792
LNC_003032	Zm00001d052792
LNC_002994	Zm00001d052792
LNC_002596	Zm00001d052792
LNC_001763	Zm00001d052792
LNC_000923	Zm00001d052792
LNC_000914	Zm00001d052792
LNC_000196	Zm00001d052792
LNC_005707	Zm00001d052783
LNC_005514	Zm00001d052783
LNC_003913	Zm00001d052783
LNC_003738	Zm00001d052783
LNC_003047	Zm00001d052783
LNC_003046	Zm00001d052783
LNC_003032	Zm00001d052783
LNC_002700	Zm00001d052783
LNC_001769	Zm00001d052783
LNC_000914	Zm00001d052783
LNC_000196	Zm00001d052783
LNC_005539	Zm00001d052775
LNC_005330	Zm00001d052775
LNC_005055	Zm00001d052775
LNC_004790	Zm00001d052775
LNC_004776	Zm00001d052775
LNC_004592	Zm00001d052775
LNC_002711	Zm00001d052775
LNC_001913	Zm00001d052775
LNC_001524	Zm00001d052775
LNC_000852	Zm00001d052775
LNC_000187	Zm00001d052775
LNC_000019	Zm00001d052775
LNC_001763	Zm00001d052748
LNC_001278	Zm00001d052748
LNC_005707	Zm00001d052733
LNC_005707	Zm00001d052726
LNC_005539	Zm00001d052726
LNC_005514	Zm00001d052726
LNC_005512	Zm00001d052726
LNC_005330	Zm00001d052726
LNC_005285	Zm00001d052726
LNC_005055	Zm00001d052726
LNC_004790	Zm00001d052726
LNC_004776	Zm00001d052726
LNC_004764	Zm00001d052726
LNC_004592	Zm00001d052726
LNC_003974	Zm00001d052726
LNC_003913	Zm00001d052726
LNC_003047	Zm00001d052726
LNC_003032	Zm00001d052726
LNC_002994	Zm00001d052726
LNC_002711	Zm00001d052726
LNC_002495	Zm00001d052726
LNC_001947	Zm00001d052726
LNC_001913	Zm00001d052726
LNC_001763	Zm00001d052726
LNC_001749	Zm00001d052726
LNC_001693	Zm00001d052726
LNC_001524	Zm00001d052726
LNC_001162	Zm00001d052726
LNC_000923	Zm00001d052726
LNC_000852	Zm00001d052726
LNC_000839	Zm00001d052726
LNC_000786	Zm00001d052726
LNC_000761	Zm00001d052726
LNC_000399	Zm00001d052726
LNC_000295	Zm00001d052726
LNC_000187	Zm00001d052726
LNC_000019	Zm00001d052726
LNC_006112	Zm00001d052725
LNC_005512	Zm00001d052725
LNC_004781	Zm00001d052725
LNC_002994	Zm00001d052725
LNC_003272	Zm00001d052682
LNC_003738	Zm00001d052673
LNC_003047	Zm00001d052673
LNC_003046	Zm00001d052673
LNC_001769	Zm00001d052673
LNC_000914	Zm00001d052673
LNC_000839	Zm00001d052673
LNC_000196	Zm00001d052673
LNC_006112	Zm00001d052661
LNC_005512	Zm00001d052661
LNC_002596	Zm00001d052661
LNC_001941	Zm00001d052661
LNC_000196	Zm00001d052661
LNC_002700	Zm00001d052651
LNC_006112	Zm00001d052639
LNC_005539	Zm00001d052639
LNC_005330	Zm00001d052639
LNC_004781	Zm00001d052639
LNC_002994	Zm00001d052639
LNC_002887	Zm00001d052639
LNC_005707	Zm00001d052636
LNC_005514	Zm00001d052636
LNC_003738	Zm00001d052636
LNC_003047	Zm00001d052636
LNC_003046	Zm00001d052636
LNC_003032	Zm00001d052636
LNC_002700	Zm00001d052636
LNC_002596	Zm00001d052636
LNC_001769	Zm00001d052636
LNC_000914	Zm00001d052636
LNC_000196	Zm00001d052636
LNC_005330	Zm00001d052616
LNC_005055	Zm00001d052616
LNC_004790	Zm00001d052616
LNC_004776	Zm00001d052616
LNC_004592	Zm00001d052616
LNC_002711	Zm00001d052616
LNC_001913	Zm00001d052616
LNC_001763	Zm00001d052616
LNC_001524	Zm00001d052616
LNC_000852	Zm00001d052616
LNC_000187	Zm00001d052616
LNC_000019	Zm00001d052616
LNC_006112	Zm00001d052612
LNC_005707	Zm00001d052612
LNC_005514	Zm00001d052612
LNC_004592	Zm00001d052612
LNC_003738	Zm00001d052612
LNC_003046	Zm00001d052612
LNC_003032	Zm00001d052612
LNC_002994	Zm00001d052612
LNC_002700	Zm00001d052612
LNC_002596	Zm00001d052612
LNC_001763	Zm00001d052612
LNC_001278	Zm00001d052612
LNC_000914	Zm00001d052612
LNC_000196	Zm00001d052612
LNC_004776	Zm00001d052609
LNC_006112	Zm00001d052533
LNC_005707	Zm00001d052533
LNC_002994	Zm00001d052533
LNC_002596	Zm00001d052533
LNC_000196	Zm00001d052533
LNC_004063	Zm00001d052527
LNC_002966	Zm00001d052527
LNC_001793	Zm00001d052527
LNC_005902	Zm00001d052513
LNC_005806	Zm00001d052513
LNC_004243	Zm00001d052513
LNC_004144	Zm00001d052513
LNC_003966	Zm00001d052513
LNC_003954	Zm00001d052513
LNC_003564	Zm00001d052513
LNC_002848	Zm00001d052513
LNC_002107	Zm00001d052513
LNC_001699	Zm00001d052513
LNC_001499	Zm00001d052513
LNC_001492	Zm00001d052513
LNC_000941	Zm00001d052513
LNC_000615	Zm00001d052513
LNC_005806	Zm00001d052509
LNC_004243	Zm00001d052509
LNC_003954	Zm00001d052509
LNC_003565	Zm00001d052509
LNC_002848	Zm00001d052509
LNC_002107	Zm00001d052509
LNC_001499	Zm00001d052509
LNC_001492	Zm00001d052509
LNC_000941	Zm00001d052509
LNC_000615	Zm00001d052509
LNC_005539	Zm00001d052483
LNC_005330	Zm00001d052483
LNC_004776	Zm00001d052483
LNC_004592	Zm00001d052483
LNC_000852	Zm00001d052483
LNC_003032	Zm00001d052458
LNC_003565	Zm00001d052457
LNC_002107	Zm00001d052457
LNC_003738	Zm00001d052442
LNC_003046	Zm00001d052442
LNC_001769	Zm00001d052442
LNC_000914	Zm00001d052442
LNC_000196	Zm00001d052442
LNC_005707	Zm00001d052433
LNC_005514	Zm00001d052433
LNC_004592	Zm00001d052433
LNC_003047	Zm00001d052433
LNC_003046	Zm00001d052433
LNC_003032	Zm00001d052433
LNC_001763	Zm00001d052433
LNC_001278	Zm00001d052433
LNC_000923	Zm00001d052433
LNC_000914	Zm00001d052433
LNC_000852	Zm00001d052433
LNC_000196	Zm00001d052433
LNC_004790	Zm00001d052405
LNC_004764	Zm00001d052405
LNC_004651	Zm00001d052405
LNC_003974	Zm00001d052405
LNC_003393	Zm00001d052405
LNC_002711	Zm00001d052405
LNC_001749	Zm00001d052405
LNC_001693	Zm00001d052405
LNC_001524	Zm00001d052405
LNC_000295	Zm00001d052405
LNC_000187	Zm00001d052405
LNC_003738	Zm00001d052395
LNC_003046	Zm00001d052395
LNC_001769	Zm00001d052395
LNC_000914	Zm00001d052395
LNC_000196	Zm00001d052395
LNC_004063	Zm00001d052390
LNC_002966	Zm00001d052390
LNC_002107	Zm00001d052390
LNC_005902	Zm00001d052387
LNC_005806	Zm00001d052387
LNC_005183	Zm00001d052387
LNC_004144	Zm00001d052387
LNC_003966	Zm00001d052387
LNC_003564	Zm00001d052387
LNC_002107	Zm00001d052387
LNC_001699	Zm00001d052387
LNC_001499	Zm00001d052387
LNC_000941	Zm00001d052387
LNC_000615	Zm00001d052387
LNC_001242	Zm00001d052386
LNC_000976	Zm00001d052386
LNC_006112	Zm00001d052385
LNC_005707	Zm00001d052385
LNC_005512	Zm00001d052385
LNC_003046	Zm00001d052385
LNC_003032	Zm00001d052385
LNC_002994	Zm00001d052385
LNC_002596	Zm00001d052385
LNC_001763	Zm00001d052385
LNC_000923	Zm00001d052385
LNC_000914	Zm00001d052385
LNC_000196	Zm00001d052385
LNC_005707	Zm00001d052324
LNC_003738	Zm00001d052324
LNC_003047	Zm00001d052324
LNC_003046	Zm00001d052324
LNC_003032	Zm00001d052324
LNC_002700	Zm00001d052324
LNC_001769	Zm00001d052324
LNC_000914	Zm00001d052324
LNC_000348	Zm00001d052324
LNC_000196	Zm00001d052324
LNC_005707	Zm00001d052322
LNC_003738	Zm00001d052322
LNC_003046	Zm00001d052322
LNC_002994	Zm00001d052322
LNC_002596	Zm00001d052322
LNC_000914	Zm00001d052322
LNC_000196	Zm00001d052322
LNC_003842	Zm00001d052316
LNC_000686	Zm00001d052316
LNC_006112	Zm00001d052292
LNC_005707	Zm00001d052292
LNC_005514	Zm00001d052292
LNC_003738	Zm00001d052292
LNC_003046	Zm00001d052292
LNC_003032	Zm00001d052292
LNC_002596	Zm00001d052292
LNC_001769	Zm00001d052292
LNC_000914	Zm00001d052292
LNC_000196	Zm00001d052292
LNC_005055	Zm00001d052277
LNC_001913	Zm00001d052277
LNC_006112	Zm00001d052269
LNC_005512	Zm00001d052269
LNC_002994	Zm00001d052269
LNC_002596	Zm00001d052269
LNC_005707	Zm00001d052268
LNC_005514	Zm00001d052268
LNC_004592	Zm00001d052268
LNC_001763	Zm00001d052268
LNC_001278	Zm00001d052268
LNC_000948	Zm00001d052268
LNC_000852	Zm00001d052268
LNC_003272	Zm00001d052263
LNC_002568	Zm00001d052263
LNC_005275	Zm00001d052261
LNC_004282	Zm00001d052261
LNC_003854	Zm00001d052261
LNC_003497	Zm00001d052261
LNC_002107	Zm00001d052261
LNC_005707	Zm00001d052252
LNC_005539	Zm00001d052252
LNC_005330	Zm00001d052252
LNC_004592	Zm00001d052252
LNC_002994	Zm00001d052252
LNC_001763	Zm00001d052252
LNC_000948	Zm00001d052252
LNC_000852	Zm00001d052252
LNC_000019	Zm00001d052252
LNC_005938	Zm00001d052243
LNC_004813	Zm00001d052243
LNC_003142	Zm00001d052243
LNC_004922	Zm00001d052242
LNC_004877	Zm00001d052242
LNC_003832	Zm00001d052242
LNC_003499	Zm00001d052242
LNC_003272	Zm00001d052242
LNC_002568	Zm00001d052242
LNC_002476	Zm00001d052242
LNC_001879	Zm00001d052242
LNC_005707	Zm00001d052234
LNC_005514	Zm00001d052234
LNC_005055	Zm00001d052234
LNC_004776	Zm00001d052234
LNC_004592	Zm00001d052234
LNC_003032	Zm00001d052234
LNC_001913	Zm00001d052234
LNC_001763	Zm00001d052234
LNC_000923	Zm00001d052234
LNC_000852	Zm00001d052234
LNC_000019	Zm00001d052234
LNC_005902	Zm00001d052231
LNC_004063	Zm00001d052231
LNC_002966	Zm00001d052231
LNC_002107	Zm00001d052231
LNC_006109	Zm00001d052229
LNC_004144	Zm00001d052229
LNC_003564	Zm00001d052229
LNC_006109	Zm00001d052227
LNC_004144	Zm00001d052227
LNC_003966	Zm00001d052227
LNC_003564	Zm00001d052227
LNC_001242	Zm00001d052227
LNC_005707	Zm00001d052223
LNC_003738	Zm00001d052223
LNC_002994	Zm00001d052223
LNC_002700	Zm00001d052223
LNC_000196	Zm00001d052223
LNC_006112	Zm00001d052210
LNC_005707	Zm00001d052210
LNC_003954	Zm00001d052206
LNC_003564	Zm00001d052206
LNC_001492	Zm00001d052206
LNC_006112	Zm00001d052192
LNC_005707	Zm00001d052192
LNC_005539	Zm00001d052192
LNC_005330	Zm00001d052192
LNC_003032	Zm00001d052192
LNC_002994	Zm00001d052192
LNC_001763	Zm00001d052192
LNC_000923	Zm00001d052192
LNC_002933	Zm00001d052189
LNC_005902	Zm00001d052185
LNC_004526	Zm00001d052185
LNC_004063	Zm00001d052185
LNC_006112	Zm00001d052173
LNC_005707	Zm00001d052173
LNC_005539	Zm00001d052173
LNC_005514	Zm00001d052173
LNC_004592	Zm00001d052173
LNC_003046	Zm00001d052173
LNC_003032	Zm00001d052173
LNC_002994	Zm00001d052173
LNC_002596	Zm00001d052173
LNC_001763	Zm00001d052173
LNC_001278	Zm00001d052173
LNC_000948	Zm00001d052173
LNC_000923	Zm00001d052173
LNC_000852	Zm00001d052173
LNC_000196	Zm00001d052173
LNC_006260	Zm00001d052170
LNC_004790	Zm00001d052170
LNC_004776	Zm00001d052170
LNC_004764	Zm00001d052170
LNC_003974	Zm00001d052170
LNC_002711	Zm00001d052170
LNC_000187	Zm00001d052170
LNC_005806	Zm00001d052164
LNC_005609	Zm00001d052164
LNC_005183	Zm00001d052164
LNC_004383	Zm00001d052164
LNC_004243	Zm00001d052164
LNC_004145	Zm00001d052164
LNC_004144	Zm00001d052164
LNC_004102	Zm00001d052164
LNC_003966	Zm00001d052164
LNC_002957	Zm00001d052164
LNC_002848	Zm00001d052164
LNC_002836	Zm00001d052164
LNC_001699	Zm00001d052164
LNC_001605	Zm00001d052164
LNC_001499	Zm00001d052164
LNC_001276	Zm00001d052164
LNC_000941	Zm00001d052164
LNC_000835	Zm00001d052164
LNC_000615	Zm00001d052164
LNC_000377	Zm00001d052164
LNC_000059	Zm00001d052164
LNC_001092	Zm00001d052124
LNC_000976	Zm00001d052124
LNC_006112	Zm00001d052066
LNC_005707	Zm00001d052066
LNC_005512	Zm00001d052066
LNC_004781	Zm00001d052066
LNC_003046	Zm00001d052066
LNC_002994	Zm00001d052066
LNC_002596	Zm00001d052066
LNC_001941	Zm00001d052066
LNC_000914	Zm00001d052066
LNC_000196	Zm00001d052066
LNC_005143	Zm00001d052060
LNC_004144	Zm00001d052060
LNC_002957	Zm00001d052060
LNC_005055	Zm00001d052042
LNC_004790	Zm00001d052042
LNC_004776	Zm00001d052042
LNC_004592	Zm00001d052042
LNC_002711	Zm00001d052042
LNC_002495	Zm00001d052042
LNC_001947	Zm00001d052042
LNC_001913	Zm00001d052042
LNC_001524	Zm00001d052042
LNC_000852	Zm00001d052042
LNC_000399	Zm00001d052042
LNC_000187	Zm00001d052042
LNC_000019	Zm00001d052042
LNC_005707	Zm00001d052041
LNC_005514	Zm00001d052041
LNC_004592	Zm00001d052041
LNC_003047	Zm00001d052041
LNC_003046	Zm00001d052041
LNC_003032	Zm00001d052041
LNC_002088	Zm00001d052041
LNC_001278	Zm00001d052041
LNC_000923	Zm00001d052041
LNC_000914	Zm00001d052041
LNC_000852	Zm00001d052041
LNC_000839	Zm00001d052041
LNC_000196	Zm00001d052041
LNC_005539	Zm00001d052026
LNC_005707	Zm00001d051981
LNC_005514	Zm00001d051981
LNC_004592	Zm00001d051981
LNC_003046	Zm00001d051981
LNC_001941	Zm00001d051981
LNC_000852	Zm00001d051981
LNC_000348	Zm00001d051981
LNC_000196	Zm00001d051981
LNC_006112	Zm00001d051977
LNC_005512	Zm00001d051977
LNC_002994	Zm00001d051977
LNC_002596	Zm00001d051977
LNC_005707	Zm00001d051956
LNC_005514	Zm00001d051956
LNC_004592	Zm00001d051956
LNC_003047	Zm00001d051956
LNC_003046	Zm00001d051956
LNC_003032	Zm00001d051956
LNC_002088	Zm00001d051956
LNC_001769	Zm00001d051956
LNC_001763	Zm00001d051956
LNC_000923	Zm00001d051956
LNC_000914	Zm00001d051956
LNC_000852	Zm00001d051956
LNC_000839	Zm00001d051956
LNC_000196	Zm00001d051956
LNC_004592	Zm00001d051952
LNC_000923	Zm00001d051952
LNC_000852	Zm00001d051952
LNC_005707	Zm00001d051945
LNC_005514	Zm00001d051945
LNC_003738	Zm00001d051945
LNC_003047	Zm00001d051945
LNC_003046	Zm00001d051945
LNC_003032	Zm00001d051945
LNC_002596	Zm00001d051945
LNC_001941	Zm00001d051945
LNC_001769	Zm00001d051945
LNC_000914	Zm00001d051945
LNC_000839	Zm00001d051945
LNC_000348	Zm00001d051945
LNC_000196	Zm00001d051945
LNC_001092	Zm00001d051936
LNC_005143	Zm00001d051912
LNC_003738	Zm00001d051912
LNC_005055	Zm00001d051894
LNC_004790	Zm00001d051894
LNC_002943	Zm00001d051894
LNC_002495	Zm00001d051894
LNC_001947	Zm00001d051894
LNC_001913	Zm00001d051894
LNC_000852	Zm00001d051894
LNC_000399	Zm00001d051894
LNC_000187	Zm00001d051894
LNC_000019	Zm00001d051894
LNC_005707	Zm00001d051892
LNC_001278	Zm00001d051892
LNC_000196	Zm00001d051892
LNC_000835	Zm00001d051885
LNC_004922	Zm00001d051883
LNC_002476	Zm00001d051883
LNC_002966	Zm00001d051875
LNC_003954	Zm00001d051872
LNC_003565	Zm00001d051872
LNC_001492	Zm00001d051872
LNC_006112	Zm00001d051837
LNC_005707	Zm00001d051837
LNC_005514	Zm00001d051837
LNC_003738	Zm00001d051837
LNC_003047	Zm00001d051837
LNC_003046	Zm00001d051837
LNC_003032	Zm00001d051837
LNC_002994	Zm00001d051837
LNC_002596	Zm00001d051837
LNC_001769	Zm00001d051837
LNC_000914	Zm00001d051837
LNC_000196	Zm00001d051837
LNC_005707	Zm00001d051833
LNC_003032	Zm00001d051833
LNC_002994	Zm00001d051833
LNC_002700	Zm00001d051833
LNC_005539	Zm00001d051829
LNC_005330	Zm00001d051829
LNC_002994	Zm00001d051829
LNC_001789	Zm00001d051829
LNC_005707	Zm00001d051814
LNC_005514	Zm00001d051814
LNC_004592	Zm00001d051814
LNC_003047	Zm00001d051814
LNC_003046	Zm00001d051814
LNC_003032	Zm00001d051814
LNC_001763	Zm00001d051814
LNC_001278	Zm00001d051814
LNC_000852	Zm00001d051814
LNC_005707	Zm00001d051804
LNC_005514	Zm00001d051804
LNC_004776	Zm00001d051804
LNC_004592	Zm00001d051804
LNC_003046	Zm00001d051804
LNC_003032	Zm00001d051804
LNC_000923	Zm00001d051804
LNC_000914	Zm00001d051804
LNC_000852	Zm00001d051804
LNC_000196	Zm00001d051804
LNC_005285	Zm00001d051791
LNC_005055	Zm00001d051791
LNC_004790	Zm00001d051791
LNC_004764	Zm00001d051791
LNC_003974	Zm00001d051791
LNC_002711	Zm00001d051791
LNC_002495	Zm00001d051791
LNC_001947	Zm00001d051791
LNC_001913	Zm00001d051791
LNC_001749	Zm00001d051791
LNC_001693	Zm00001d051791
LNC_001524	Zm00001d051791
LNC_000399	Zm00001d051791
LNC_000295	Zm00001d051791
LNC_000187	Zm00001d051791
LNC_005707	Zm00001d051736
LNC_001763	Zm00001d051736
LNC_005055	Zm00001d051704
LNC_004790	Zm00001d051704
LNC_004776	Zm00001d051704
LNC_004592	Zm00001d051704
LNC_003974	Zm00001d051704
LNC_002711	Zm00001d051704
LNC_002495	Zm00001d051704
LNC_001947	Zm00001d051704
LNC_001913	Zm00001d051704
LNC_001749	Zm00001d051704
LNC_001693	Zm00001d051704
LNC_001524	Zm00001d051704
LNC_000852	Zm00001d051704
LNC_000399	Zm00001d051704
LNC_000187	Zm00001d051704
LNC_000019	Zm00001d051704
LNC_006260	Zm00001d051693
LNC_004790	Zm00001d051693
LNC_004776	Zm00001d051693
LNC_002711	Zm00001d051693
LNC_001524	Zm00001d051693
LNC_000761	Zm00001d051693
LNC_000187	Zm00001d051693
LNC_000156	Zm00001d051693
LNC_005861	Zm00001d051684
LNC_004093	Zm00001d051684
LNC_003353	Zm00001d051684
LNC_002676	Zm00001d051684
LNC_002450	Zm00001d051684
LNC_001568	Zm00001d051684
LNC_001165	Zm00001d051684
LNC_001010	Zm00001d051684
LNC_000298	Zm00001d051684
LNC_000135	Zm00001d051684
LNC_005539	Zm00001d051675
LNC_005330	Zm00001d051675
LNC_004781	Zm00001d051675
LNC_000948	Zm00001d051675
LNC_003832	Zm00001d051666
LNC_005707	Zm00001d051653
LNC_005514	Zm00001d051653
LNC_004592	Zm00001d051653
LNC_003738	Zm00001d051653
LNC_003046	Zm00001d051653
LNC_002700	Zm00001d051653
LNC_001278	Zm00001d051653
LNC_000914	Zm00001d051653
LNC_000196	Zm00001d051653
LNC_000074	Zm00001d051634
LNC_005707	Zm00001d051606
LNC_005514	Zm00001d051606
LNC_003738	Zm00001d051606
LNC_003047	Zm00001d051606
LNC_003046	Zm00001d051606
LNC_003032	Zm00001d051606
LNC_002700	Zm00001d051606
LNC_002596	Zm00001d051606
LNC_001769	Zm00001d051606
LNC_000914	Zm00001d051606
LNC_000196	Zm00001d051606
LNC_003913	Zm00001d051598
LNC_005707	Zm00001d051589
LNC_004781	Zm00001d051589
LNC_002994	Zm00001d051589
LNC_000948	Zm00001d051589
LNC_000196	Zm00001d051589
LNC_004482	Zm00001d051586
LNC_002924	Zm00001d051586
LNC_002476	Zm00001d051586
LNC_001879	Zm00001d051586
LNC_001789	Zm00001d051586
LNC_004105	Zm00001d051564
LNC_003842	Zm00001d051564
LNC_000686	Zm00001d051564
LNC_004941	Zm00001d051556
LNC_004482	Zm00001d051556
LNC_001789	Zm00001d051556
LNC_005938	Zm00001d051525
LNC_004813	Zm00001d051525
LNC_003142	Zm00001d051525
LNC_005707	Zm00001d051520
LNC_005514	Zm00001d051520
LNC_005055	Zm00001d051520
LNC_004776	Zm00001d051520
LNC_004592	Zm00001d051520
LNC_003047	Zm00001d051520
LNC_003046	Zm00001d051520
LNC_003032	Zm00001d051520
LNC_001763	Zm00001d051520
LNC_001278	Zm00001d051520
LNC_000923	Zm00001d051520
LNC_000852	Zm00001d051520
LNC_000196	Zm00001d051520
LNC_005707	Zm00001d051505
LNC_005514	Zm00001d051505
LNC_004592	Zm00001d051505
LNC_003046	Zm00001d051505
LNC_003032	Zm00001d051505
LNC_001763	Zm00001d051505
LNC_001278	Zm00001d051505
LNC_000914	Zm00001d051505
LNC_000852	Zm00001d051505
LNC_000196	Zm00001d051505
LNC_005285	Zm00001d051480
LNC_005055	Zm00001d051480
LNC_004790	Zm00001d051480
LNC_004776	Zm00001d051480
LNC_004592	Zm00001d051480
LNC_000852	Zm00001d051480
LNC_000761	Zm00001d051480
LNC_000187	Zm00001d051480
LNC_006112	Zm00001d051461
LNC_005707	Zm00001d051461
LNC_005514	Zm00001d051461
LNC_004776	Zm00001d051461
LNC_004592	Zm00001d051461
LNC_003046	Zm00001d051461
LNC_003032	Zm00001d051461
LNC_002994	Zm00001d051461
LNC_002596	Zm00001d051461
LNC_001763	Zm00001d051461
LNC_000923	Zm00001d051461
LNC_000914	Zm00001d051461
LNC_000852	Zm00001d051461
LNC_000196	Zm00001d051461
LNC_004877	Zm00001d051429
LNC_003832	Zm00001d051429
LNC_003499	Zm00001d051429
LNC_003272	Zm00001d051429
LNC_002568	Zm00001d051429
LNC_002476	Zm00001d051429
LNC_005902	Zm00001d051420
LNC_003954	Zm00001d051420
LNC_000941	Zm00001d051420
LNC_006112	Zm00001d051419
LNC_005539	Zm00001d051419
LNC_005512	Zm00001d051419
LNC_002994	Zm00001d051419
LNC_005285	Zm00001d051418
LNC_004790	Zm00001d051418
LNC_000761	Zm00001d051418
LNC_000187	Zm00001d051418
LNC_000156	Zm00001d051418
LNC_005055	Zm00001d051389
LNC_004790	Zm00001d051389
LNC_004776	Zm00001d051389
LNC_004592	Zm00001d051389
LNC_001947	Zm00001d051389
LNC_001913	Zm00001d051389
LNC_001763	Zm00001d051389
LNC_001524	Zm00001d051389
LNC_000852	Zm00001d051389
LNC_000187	Zm00001d051389
LNC_000019	Zm00001d051389
LNC_005539	Zm00001d051384
LNC_002994	Zm00001d051384
LNC_001763	Zm00001d051384
LNC_005707	Zm00001d051343
LNC_005514	Zm00001d051343
LNC_003032	Zm00001d051343
LNC_002994	Zm00001d051343
LNC_001763	Zm00001d051343
LNC_005707	Zm00001d051333
LNC_005539	Zm00001d051333
LNC_005514	Zm00001d051333
LNC_005330	Zm00001d051333
LNC_004592	Zm00001d051333
LNC_002994	Zm00001d051333
LNC_001763	Zm00001d051333
LNC_000948	Zm00001d051333
LNC_000852	Zm00001d051333
LNC_005707	Zm00001d051316
LNC_005514	Zm00001d051316
LNC_004592	Zm00001d051316
LNC_003047	Zm00001d051316
LNC_003046	Zm00001d051316
LNC_003032	Zm00001d051316
LNC_002994	Zm00001d051316
LNC_002700	Zm00001d051316
LNC_001763	Zm00001d051316
LNC_000914	Zm00001d051316
LNC_000196	Zm00001d051316
LNC_006112	Zm00001d051314
LNC_005707	Zm00001d051314
LNC_005512	Zm00001d051314
LNC_003046	Zm00001d051314
LNC_002596	Zm00001d051314
LNC_001941	Zm00001d051314
LNC_000914	Zm00001d051314
LNC_000196	Zm00001d051314
LNC_006112	Zm00001d051313
LNC_005707	Zm00001d051313
LNC_005512	Zm00001d051313
LNC_002994	Zm00001d051313
LNC_002596	Zm00001d051313
LNC_001763	Zm00001d051313
LNC_005902	Zm00001d051302
LNC_003966	Zm00001d051302
LNC_002107	Zm00001d051302
LNC_005055	Zm00001d051267
LNC_004790	Zm00001d051267
LNC_003974	Zm00001d051267
LNC_001947	Zm00001d051267
LNC_001524	Zm00001d051267
LNC_000852	Zm00001d051267
LNC_000399	Zm00001d051267
LNC_000019	Zm00001d051267
LNC_005902	Zm00001d051239
LNC_002107	Zm00001d051239
LNC_004941	Zm00001d051203
LNC_004922	Zm00001d051203
LNC_004482	Zm00001d051203
LNC_002476	Zm00001d051203
LNC_001879	Zm00001d051203
LNC_001789	Zm00001d051203
LNC_004282	Zm00001d051174
LNC_005707	Zm00001d051163
LNC_005539	Zm00001d051163
LNC_005514	Zm00001d051163
LNC_005330	Zm00001d051163
LNC_004781	Zm00001d051163
LNC_003046	Zm00001d051163
LNC_000196	Zm00001d051163
LNC_005707	Zm00001d051161
LNC_005514	Zm00001d051161
LNC_005512	Zm00001d051161
LNC_002994	Zm00001d051161
LNC_001941	Zm00001d051161
LNC_001763	Zm00001d051161
LNC_001278	Zm00001d051161
LNC_000948	Zm00001d051161
LNC_000196	Zm00001d051161
LNC_001793	Zm00001d051156
LNC_001092	Zm00001d051156
LNC_001242	Zm00001d051149
LNC_001092	Zm00001d051149
LNC_000976	Zm00001d051149
LNC_005707	Zm00001d051140
LNC_005514	Zm00001d051140
LNC_003047	Zm00001d051140
LNC_003046	Zm00001d051140
LNC_003032	Zm00001d051140
LNC_002994	Zm00001d051140
LNC_002700	Zm00001d051140
LNC_001763	Zm00001d051140
LNC_000196	Zm00001d051140
LNC_003832	Zm00001d051053
LNC_003499	Zm00001d051053
LNC_002476	Zm00001d051053
LNC_006112	Zm00001d050992
LNC_005707	Zm00001d050992
LNC_005514	Zm00001d050992
LNC_005330	Zm00001d050992
LNC_004781	Zm00001d050992
LNC_004776	Zm00001d050992
LNC_004592	Zm00001d050992
LNC_003032	Zm00001d050992
LNC_002994	Zm00001d050992
LNC_001763	Zm00001d050992
LNC_000923	Zm00001d050992
LNC_000852	Zm00001d050992
LNC_000019	Zm00001d050992
LNC_005707	Zm00001d050985
LNC_005539	Zm00001d050985
LNC_005330	Zm00001d050985
LNC_004776	Zm00001d050985
LNC_004592	Zm00001d050985
LNC_003032	Zm00001d050985
LNC_002994	Zm00001d050985
LNC_001763	Zm00001d050985
LNC_000923	Zm00001d050985
LNC_000852	Zm00001d050985
LNC_006112	Zm00001d050981
LNC_005707	Zm00001d050981
LNC_005514	Zm00001d050981
LNC_004781	Zm00001d050981
LNC_004592	Zm00001d050981
LNC_003046	Zm00001d050981
LNC_002994	Zm00001d050981
LNC_002596	Zm00001d050981
LNC_001278	Zm00001d050981
LNC_000914	Zm00001d050981
LNC_000852	Zm00001d050981
LNC_000196	Zm00001d050981
LNC_005215	Zm00001d050916
LNC_002505	Zm00001d050916
LNC_001092	Zm00001d050899
LNC_006112	Zm00001d050893
LNC_005707	Zm00001d050893
LNC_005539	Zm00001d050893
LNC_005330	Zm00001d050893
LNC_004592	Zm00001d050893
LNC_002994	Zm00001d050893
LNC_001763	Zm00001d050893
LNC_000923	Zm00001d050893
LNC_000852	Zm00001d050893
LNC_004063	Zm00001d050850
LNC_002924	Zm00001d050850
LNC_005847	Zm00001d050840
LNC_000156	Zm00001d050840
LNC_002966	Zm00001d050824
LNC_002107	Zm00001d050824
LNC_001793	Zm00001d050824
LNC_006112	Zm00001d050714
LNC_005707	Zm00001d050714
LNC_005514	Zm00001d050714
LNC_004592	Zm00001d050714
LNC_003738	Zm00001d050714
LNC_003047	Zm00001d050714
LNC_003046	Zm00001d050714
LNC_003032	Zm00001d050714
LNC_002994	Zm00001d050714
LNC_002700	Zm00001d050714
LNC_002596	Zm00001d050714
LNC_001763	Zm00001d050714
LNC_001278	Zm00001d050714
LNC_000914	Zm00001d050714
LNC_000196	Zm00001d050714
LNC_001941	Zm00001d050697
LNC_001941	Zm00001d050649
LNC_004941	Zm00001d050635
LNC_004482	Zm00001d050635
LNC_003832	Zm00001d050635
LNC_002476	Zm00001d050635
LNC_001879	Zm00001d050635
LNC_001789	Zm00001d050635
LNC_006112	Zm00001d050493
LNC_005707	Zm00001d050493
LNC_005512	Zm00001d050493
LNC_002994	Zm00001d050493
LNC_002596	Zm00001d050493
LNC_000914	Zm00001d050493
LNC_000196	Zm00001d050493
LNC_005679	Zm00001d050457
LNC_003893	Zm00001d050457
LNC_002398	Zm00001d050457
LNC_005055	Zm00001d050417
LNC_004790	Zm00001d050417
LNC_003974	Zm00001d050417
LNC_002495	Zm00001d050417
LNC_001947	Zm00001d050417
LNC_001913	Zm00001d050417
LNC_001749	Zm00001d050417
LNC_001693	Zm00001d050417
LNC_001524	Zm00001d050417
LNC_000399	Zm00001d050417
LNC_000187	Zm00001d050417
LNC_000019	Zm00001d050417
LNC_005707	Zm00001d050394
LNC_001242	Zm00001d050371
LNC_000976	Zm00001d050371
LNC_001276	Zm00001d050336
LNC_000059	Zm00001d050336
LNC_005707	Zm00001d050277
LNC_005514	Zm00001d050277
LNC_003738	Zm00001d050277
LNC_003047	Zm00001d050277
LNC_003046	Zm00001d050277
LNC_003032	Zm00001d050277
LNC_002700	Zm00001d050277
LNC_001769	Zm00001d050277
LNC_000914	Zm00001d050277
LNC_000196	Zm00001d050277
LNC_005679	Zm00001d050266
LNC_005707	Zm00001d050241
LNC_002994	Zm00001d050241
LNC_002700	Zm00001d050241
LNC_000196	Zm00001d050241
LNC_004776	Zm00001d050224
LNC_004592	Zm00001d050224
LNC_000852	Zm00001d050224
LNC_000187	Zm00001d050224
LNC_000019	Zm00001d050224
LNC_006109	Zm00001d050211
LNC_004526	Zm00001d050211
LNC_003564	Zm00001d050211
LNC_001242	Zm00001d050211
LNC_001092	Zm00001d050211
LNC_004526	Zm00001d050195
LNC_004063	Zm00001d050195
LNC_001793	Zm00001d050195
LNC_001092	Zm00001d050195
LNC_006112	Zm00001d050191
LNC_005707	Zm00001d050191
LNC_005539	Zm00001d050191
LNC_002994	Zm00001d050191
LNC_001763	Zm00001d050191
LNC_000948	Zm00001d050191
LNC_005539	Zm00001d050153
LNC_005330	Zm00001d050153
LNC_002994	Zm00001d050153
LNC_000948	Zm00001d050153
LNC_006112	Zm00001d050148
LNC_005707	Zm00001d050148
LNC_003032	Zm00001d050148
LNC_002994	Zm00001d050148
LNC_001763	Zm00001d050148
LNC_006112	Zm00001d050107
LNC_005707	Zm00001d050107
LNC_003046	Zm00001d050107
LNC_003032	Zm00001d050107
LNC_002994	Zm00001d050107
LNC_002596	Zm00001d050107
LNC_000923	Zm00001d050107
LNC_000914	Zm00001d050107
LNC_000196	Zm00001d050107
LNC_005707	Zm00001d050092
LNC_002994	Zm00001d050092
LNC_004754	Zm00001d050043
LNC_002666	Zm00001d050043
LNC_000535	Zm00001d050043
LNC_005707	Zm00001d050039
LNC_005512	Zm00001d050039
LNC_002596	Zm00001d050039
LNC_001941	Zm00001d050039
LNC_000914	Zm00001d050039
LNC_000196	Zm00001d050039
LNC_001941	Zm00001d050026
LNC_001769	Zm00001d050026
LNC_000914	Zm00001d050026
LNC_000348	Zm00001d050026
LNC_004754	Zm00001d049995
LNC_000843	Zm00001d049995
LNC_000535	Zm00001d049995
LNC_005330	Zm00001d049990
LNC_005055	Zm00001d049990
LNC_004790	Zm00001d049990
LNC_004776	Zm00001d049990
LNC_003974	Zm00001d049990
LNC_002711	Zm00001d049990
LNC_001913	Zm00001d049990
LNC_001524	Zm00001d049990
LNC_000852	Zm00001d049990
LNC_000399	Zm00001d049990
LNC_000187	Zm00001d049990
LNC_000019	Zm00001d049990
LNC_005707	Zm00001d049925
LNC_005514	Zm00001d049925
LNC_003738	Zm00001d049925
LNC_003047	Zm00001d049925
LNC_003046	Zm00001d049925
LNC_002700	Zm00001d049925
LNC_001769	Zm00001d049925
LNC_000914	Zm00001d049925
LNC_000196	Zm00001d049925
LNC_005707	Zm00001d049916
LNC_005514	Zm00001d049916
LNC_003032	Zm00001d049916
LNC_002994	Zm00001d049916
LNC_001763	Zm00001d049916
LNC_003832	Zm00001d049910
LNC_003499	Zm00001d049910
LNC_002568	Zm00001d049910
LNC_002476	Zm00001d049910
LNC_001879	Zm00001d049910
LNC_005055	Zm00001d049906
LNC_004790	Zm00001d049906
LNC_003974	Zm00001d049906
LNC_002711	Zm00001d049906
LNC_002495	Zm00001d049906
LNC_001947	Zm00001d049906
LNC_001913	Zm00001d049906
LNC_001524	Zm00001d049906
LNC_000852	Zm00001d049906
LNC_000399	Zm00001d049906
LNC_000187	Zm00001d049906
LNC_000019	Zm00001d049906
LNC_005938	Zm00001d049831
LNC_004813	Zm00001d049831
LNC_001276	Zm00001d049815
LNC_000059	Zm00001d049815
LNC_005707	Zm00001d049805
LNC_003032	Zm00001d049805
LNC_002994	Zm00001d049805
LNC_001763	Zm00001d049805
LNC_005707	Zm00001d049804
LNC_002994	Zm00001d049804
LNC_006112	Zm00001d049793
LNC_005707	Zm00001d049793
LNC_005514	Zm00001d049793
LNC_004592	Zm00001d049793
LNC_002994	Zm00001d049793
LNC_002596	Zm00001d049793
LNC_001763	Zm00001d049793
LNC_001278	Zm00001d049793
LNC_000923	Zm00001d049793
LNC_000852	Zm00001d049793
LNC_001276	Zm00001d049790
LNC_000976	Zm00001d049790
LNC_000059	Zm00001d049790
LNC_004776	Zm00001d049769
LNC_004592	Zm00001d049769
LNC_003046	Zm00001d049769
LNC_000839	Zm00001d049769
LNC_000761	Zm00001d049769
LNC_003032	Zm00001d049750
LNC_005902	Zm00001d049716
LNC_004526	Zm00001d049716
LNC_004063	Zm00001d049716
LNC_002107	Zm00001d049716
LNC_005707	Zm00001d049715
LNC_005514	Zm00001d049715
LNC_004776	Zm00001d049715
LNC_004592	Zm00001d049715
LNC_003046	Zm00001d049715
LNC_003032	Zm00001d049715
LNC_000852	Zm00001d049715
LNC_006112	Zm00001d049713
LNC_005707	Zm00001d049713
LNC_005514	Zm00001d049713
LNC_004781	Zm00001d049713
LNC_004592	Zm00001d049713
LNC_003046	Zm00001d049713
LNC_003032	Zm00001d049713
LNC_002994	Zm00001d049713
LNC_002596	Zm00001d049713
LNC_001763	Zm00001d049713
LNC_001278	Zm00001d049713
LNC_000914	Zm00001d049713
LNC_000852	Zm00001d049713
LNC_000196	Zm00001d049713
LNC_005707	Zm00001d049692
LNC_005514	Zm00001d049692
LNC_004592	Zm00001d049692
LNC_003047	Zm00001d049692
LNC_003046	Zm00001d049692
LNC_003032	Zm00001d049692
LNC_002994	Zm00001d049692
LNC_001763	Zm00001d049692
LNC_000948	Zm00001d049692
LNC_000914	Zm00001d049692
LNC_000196	Zm00001d049692
LNC_005707	Zm00001d049690
LNC_005330	Zm00001d049690
LNC_005055	Zm00001d049690
LNC_004790	Zm00001d049690
LNC_004776	Zm00001d049690
LNC_004592	Zm00001d049690
LNC_000852	Zm00001d049690
LNC_000187	Zm00001d049690
LNC_005707	Zm00001d049678
LNC_003738	Zm00001d049678
LNC_002700	Zm00001d049678
LNC_005514	Zm00001d049677
LNC_004592	Zm00001d049677
LNC_003047	Zm00001d049677
LNC_003032	Zm00001d049677
LNC_002088	Zm00001d049677
LNC_000852	Zm00001d049677
LNC_003738	Zm00001d049665
LNC_001941	Zm00001d049665
LNC_001769	Zm00001d049665
LNC_000914	Zm00001d049665
LNC_000348	Zm00001d049665
LNC_000196	Zm00001d049665
LNC_005938	Zm00001d049649
LNC_005514	Zm00001d049649
LNC_004813	Zm00001d049649
LNC_005707	Zm00001d049648
LNC_005514	Zm00001d049648
LNC_004592	Zm00001d049648
LNC_003047	Zm00001d049648
LNC_003046	Zm00001d049648
LNC_003032	Zm00001d049648
LNC_001769	Zm00001d049648
LNC_001763	Zm00001d049648
LNC_000914	Zm00001d049648
LNC_000852	Zm00001d049648
LNC_000196	Zm00001d049648
LNC_006112	Zm00001d049643
LNC_005707	Zm00001d049643
LNC_002994	Zm00001d049643
LNC_002887	Zm00001d049636
LNC_005707	Zm00001d049616
LNC_005514	Zm00001d049616
LNC_004592	Zm00001d049616
LNC_003738	Zm00001d049616
LNC_003047	Zm00001d049616
LNC_003046	Zm00001d049616
LNC_003032	Zm00001d049616
LNC_001769	Zm00001d049616
LNC_001763	Zm00001d049616
LNC_000914	Zm00001d049616
LNC_000852	Zm00001d049616
LNC_000196	Zm00001d049616
LNC_005707	Zm00001d049606
LNC_005514	Zm00001d049606
LNC_003738	Zm00001d049606
LNC_003047	Zm00001d049606
LNC_003046	Zm00001d049606
LNC_003032	Zm00001d049606
LNC_002700	Zm00001d049606
LNC_002596	Zm00001d049606
LNC_001815	Zm00001d049606
LNC_001769	Zm00001d049606
LNC_000914	Zm00001d049606
LNC_000196	Zm00001d049606
LNC_005707	Zm00001d049595
LNC_005514	Zm00001d049595
LNC_004592	Zm00001d049595
LNC_003047	Zm00001d049595
LNC_003032	Zm00001d049595
LNC_001763	Zm00001d049595
LNC_000852	Zm00001d049595
LNC_005707	Zm00001d049584
LNC_003047	Zm00001d049584
LNC_003046	Zm00001d049584
LNC_003032	Zm00001d049584
LNC_000914	Zm00001d049584
LNC_000196	Zm00001d049584
LNC_003832	Zm00001d049554
LNC_005514	Zm00001d049551
LNC_004592	Zm00001d049551
LNC_001763	Zm00001d049551
LNC_000852	Zm00001d049551
LNC_005707	Zm00001d049545
LNC_005514	Zm00001d049545
LNC_003738	Zm00001d049545
LNC_003047	Zm00001d049545
LNC_003046	Zm00001d049545
LNC_003032	Zm00001d049545
LNC_002700	Zm00001d049545
LNC_001769	Zm00001d049545
LNC_000914	Zm00001d049545
LNC_000196	Zm00001d049545
LNC_006112	Zm00001d049541
LNC_005707	Zm00001d049541
LNC_005514	Zm00001d049541
LNC_004781	Zm00001d049541
LNC_003046	Zm00001d049541
LNC_002994	Zm00001d049541
LNC_001763	Zm00001d049541
LNC_001278	Zm00001d049541
LNC_000948	Zm00001d049541
LNC_000196	Zm00001d049541
LNC_005707	Zm00001d049510
LNC_005514	Zm00001d049510
LNC_003738	Zm00001d049510
LNC_003047	Zm00001d049510
LNC_003046	Zm00001d049510
LNC_003032	Zm00001d049510
LNC_002700	Zm00001d049510
LNC_001947	Zm00001d049510
LNC_001941	Zm00001d049510
LNC_001769	Zm00001d049510
LNC_000914	Zm00001d049510
LNC_000399	Zm00001d049510
LNC_000196	Zm00001d049510
LNC_005539	Zm00001d049502
LNC_005330	Zm00001d049502
LNC_004781	Zm00001d049502
LNC_002994	Zm00001d049502
LNC_002860	Zm00001d049502
LNC_001763	Zm00001d049464
LNC_005938	Zm00001d049421
LNC_004813	Zm00001d049421
LNC_003142	Zm00001d049421
LNC_005938	Zm00001d049418
LNC_004813	Zm00001d049418
LNC_003142	Zm00001d049418
LNC_000847	Zm00001d049288
LNC_005707	Zm00001d049265
LNC_005514	Zm00001d049265
LNC_003738	Zm00001d049265
LNC_003046	Zm00001d049265
LNC_002700	Zm00001d049265
LNC_001278	Zm00001d049265
LNC_000914	Zm00001d049265
LNC_000196	Zm00001d049265
LNC_006112	Zm00001d049258
LNC_005707	Zm00001d049258
LNC_005514	Zm00001d049258
LNC_002994	Zm00001d049258
LNC_001763	Zm00001d049258
LNC_001278	Zm00001d049258
LNC_005707	Zm00001d049252
LNC_005514	Zm00001d049252
LNC_004592	Zm00001d049252
LNC_003047	Zm00001d049252
LNC_003046	Zm00001d049252
LNC_003032	Zm00001d049252
LNC_001769	Zm00001d049252
LNC_001763	Zm00001d049252
LNC_000914	Zm00001d049252
LNC_000852	Zm00001d049252
LNC_000196	Zm00001d049252
LNC_005707	Zm00001d049234
LNC_005514	Zm00001d049234
LNC_003738	Zm00001d049234
LNC_003047	Zm00001d049234
LNC_003046	Zm00001d049234
LNC_002700	Zm00001d049234
LNC_001278	Zm00001d049234
LNC_000914	Zm00001d049234
LNC_000196	Zm00001d049234
LNC_005707	Zm00001d049228
LNC_005514	Zm00001d049228
LNC_003738	Zm00001d049228
LNC_003046	Zm00001d049228
LNC_003032	Zm00001d049228
LNC_002994	Zm00001d049228
LNC_002700	Zm00001d049228
LNC_000914	Zm00001d049228
LNC_000196	Zm00001d049228
LNC_003272	Zm00001d049225
LNC_004592	Zm00001d049218
LNC_000852	Zm00001d049218
LNC_005275	Zm00001d049204
LNC_003854	Zm00001d049204
LNC_002107	Zm00001d049204
LNC_003497	Zm00001d049191
LNC_005902	Zm00001d049187
LNC_003966	Zm00001d049187
LNC_001242	Zm00001d049187
LNC_001077	Zm00001d049187
LNC_005938	Zm00001d049179
LNC_004813	Zm00001d049179
LNC_002711	Zm00001d049178
LNC_001524	Zm00001d049178
LNC_001162	Zm00001d049178
LNC_005707	Zm00001d049158
LNC_005514	Zm00001d049158
LNC_004592	Zm00001d049158
LNC_003046	Zm00001d049158
LNC_003032	Zm00001d049158
LNC_002994	Zm00001d049158
LNC_001763	Zm00001d049158
LNC_001278	Zm00001d049158
LNC_000948	Zm00001d049158
LNC_000852	Zm00001d049158
LNC_005707	Zm00001d049145
LNC_005514	Zm00001d049145
LNC_004592	Zm00001d049145
LNC_003738	Zm00001d049145
LNC_003047	Zm00001d049145
LNC_003046	Zm00001d049145
LNC_003032	Zm00001d049145
LNC_001769	Zm00001d049145
LNC_001763	Zm00001d049145
LNC_001278	Zm00001d049145
LNC_000923	Zm00001d049145
LNC_000914	Zm00001d049145
LNC_000852	Zm00001d049145
LNC_000196	Zm00001d049145
LNC_006112	Zm00001d049134
LNC_005512	Zm00001d049134
LNC_005707	Zm00001d049121
LNC_005514	Zm00001d049121
LNC_003738	Zm00001d049121
LNC_003047	Zm00001d049121
LNC_003046	Zm00001d049121
LNC_003032	Zm00001d049121
LNC_001769	Zm00001d049121
LNC_000914	Zm00001d049121
LNC_000196	Zm00001d049121
LNC_005512	Zm00001d049120
LNC_002994	Zm00001d049120
LNC_002835	Zm00001d049099
LNC_005275	Zm00001d049042
LNC_004282	Zm00001d049042
LNC_003497	Zm00001d049042
LNC_000074	Zm00001d049042
LNC_005707	Zm00001d049020
LNC_005514	Zm00001d049020
LNC_004592	Zm00001d049020
LNC_003046	Zm00001d049020
LNC_001763	Zm00001d049020
LNC_001278	Zm00001d049020
LNC_000852	Zm00001d049020
LNC_001242	Zm00001d049002
LNC_000976	Zm00001d049002
LNC_002994	Zm00001d048993
LNC_005707	Zm00001d048985
LNC_005514	Zm00001d048985
LNC_005055	Zm00001d048985
LNC_004592	Zm00001d048985
LNC_003047	Zm00001d048985
LNC_003046	Zm00001d048985
LNC_003032	Zm00001d048985
LNC_001763	Zm00001d048985
LNC_001278	Zm00001d048985
LNC_000852	Zm00001d048985
LNC_004063	Zm00001d048979
LNC_003832	Zm00001d048979
LNC_005707	Zm00001d048968
LNC_003738	Zm00001d048968
LNC_003047	Zm00001d048968
LNC_003046	Zm00001d048968
LNC_003032	Zm00001d048968
LNC_002700	Zm00001d048968
LNC_001769	Zm00001d048968
LNC_000914	Zm00001d048968
LNC_000196	Zm00001d048968
LNC_005539	Zm00001d048962
LNC_005330	Zm00001d048962
LNC_002994	Zm00001d048962
LNC_001763	Zm00001d048962
LNC_000923	Zm00001d048962
LNC_005707	Zm00001d048960
LNC_005514	Zm00001d048960
LNC_004592	Zm00001d048960
LNC_003047	Zm00001d048960
LNC_003046	Zm00001d048960
LNC_003032	Zm00001d048960
LNC_001769	Zm00001d048960
LNC_001763	Zm00001d048960
LNC_001278	Zm00001d048960
LNC_000923	Zm00001d048960
LNC_000914	Zm00001d048960
LNC_000852	Zm00001d048960
LNC_000839	Zm00001d048960
LNC_000196	Zm00001d048960
LNC_005539	Zm00001d048907
LNC_005330	Zm00001d048907
LNC_001763	Zm00001d048907
LNC_000852	Zm00001d048907
LNC_000019	Zm00001d048907
LNC_005806	Zm00001d048903
LNC_004144	Zm00001d048903
LNC_003954	Zm00001d048903
LNC_003565	Zm00001d048903
LNC_003564	Zm00001d048903
LNC_001492	Zm00001d048903
LNC_000615	Zm00001d048903
LNC_002107	Zm00001d048887
LNC_004482	Zm00001d048877
LNC_002924	Zm00001d048877
LNC_001879	Zm00001d048877
LNC_001789	Zm00001d048868
LNC_001078	Zm00001d048868
LNC_004651	Zm00001d048866
LNC_006112	Zm00001d048843
LNC_005707	Zm00001d048843
LNC_005514	Zm00001d048843
LNC_003738	Zm00001d048843
LNC_003047	Zm00001d048843
LNC_003046	Zm00001d048843
LNC_003032	Zm00001d048843
LNC_002994	Zm00001d048843
LNC_002700	Zm00001d048843
LNC_002596	Zm00001d048843
LNC_001941	Zm00001d048843
LNC_001769	Zm00001d048843
LNC_001278	Zm00001d048843
LNC_000914	Zm00001d048843
LNC_000196	Zm00001d048843
LNC_003032	Zm00001d048837
LNC_001763	Zm00001d048837
LNC_006112	Zm00001d048796
LNC_004776	Zm00001d048796
LNC_004592	Zm00001d048796
LNC_000923	Zm00001d048796
LNC_000852	Zm00001d048796
LNC_000188	Zm00001d048796
LNC_005707	Zm00001d048795
LNC_003738	Zm00001d048795
LNC_003047	Zm00001d048795
LNC_003046	Zm00001d048795
LNC_002596	Zm00001d048795
LNC_001769	Zm00001d048795
LNC_000914	Zm00001d048795
LNC_000196	Zm00001d048795
LNC_005707	Zm00001d048771
LNC_002994	Zm00001d048771
LNC_001763	Zm00001d048771
LNC_005707	Zm00001d048760
LNC_002994	Zm00001d048760
LNC_001763	Zm00001d048760
LNC_001278	Zm00001d048718
LNC_004754	Zm00001d048703
LNC_002666	Zm00001d048703
LNC_003738	Zm00001d048696
LNC_003046	Zm00001d048696
LNC_002700	Zm00001d048696
LNC_001941	Zm00001d048696
LNC_000914	Zm00001d048696
LNC_000196	Zm00001d048696
LNC_004764	Zm00001d048651
LNC_003974	Zm00001d048651
LNC_002495	Zm00001d048651
LNC_001693	Zm00001d048651
LNC_000295	Zm00001d048651
LNC_005707	Zm00001d048631
LNC_005514	Zm00001d048631
LNC_003032	Zm00001d048631
LNC_002994	Zm00001d048631
LNC_001763	Zm00001d048631
LNC_005707	Zm00001d048625
LNC_002994	Zm00001d048625
LNC_001763	Zm00001d048625
LNC_004877	Zm00001d048621
LNC_003832	Zm00001d048621
LNC_003499	Zm00001d048621
LNC_002568	Zm00001d048621
LNC_002476	Zm00001d048621
LNC_001879	Zm00001d048621
LNC_006112	Zm00001d048602
LNC_005707	Zm00001d048602
LNC_004781	Zm00001d048602
LNC_004592	Zm00001d048602
LNC_002994	Zm00001d048602
LNC_001763	Zm00001d048602
LNC_001278	Zm00001d048602
LNC_000852	Zm00001d048602
LNC_006112	Zm00001d048601
LNC_005707	Zm00001d048601
[truncated: 20,228 more rows]
